# Supplementary material for: Adaptation dynamics between copy-number and point mutations
Source: eLife journal article supplement (doi:10.7554/elife.82240), 2022-12-22
Supplement: supp [file 20190109_H5r_DOGr_IT028.xls]

## Sheet: Plate 1 - Sheet1
Software Version	2012-01-02
Experiment File Path:	C:\Users\Public\Documents\Experiments\Bella\test_experiments\20190109_H5r_DOGr_IT028.xpt
Protocol File Path:	C:\Users\Public\Documents\Protocols\Bella\test_experiment.prt
Plate Number	Plate 1
Date	2019-01-09
Time	1899-12-31 10:54:37
Reader Type:	Synergy H1
Reader Serial Number:	266878
Reading Type	Reader
Procedure Details
Plate Type	96 WELL PLATE (Use plate lid)
Discontinuous Kinetics	Runtime 2:00:00 (D:HH:MM), Interval 1:00:00, 3 Reads
Set Temperature	Setpoint 37°C
	Preheat before moving to next step
Start Kinetic	Runtime 48:00:00 (HH:MM:SS), Interval 0:10:00, 289 Reads
Shake	Double Orbital: Continuous
	Frequency: 365 cpm (2 mm)
Read	Absorbance Endpoint
	Full Plate
	Wavelengths: 600
	Read Speed: Sweep, Delay: 0 msec, Measurements/Data Point: 1
Read	Fluorescence Endpoint
	Full Plate
	Filter Set 1
	Excitation: 515, Emission: 545
	Optics: Top, Gain: 100
	Light Source: Xenon Flash, Lamp Energy: High
	Read Speed: Normal, Delay: 100 msec, Measurements/Data Point: 10
	Read Height: 7 mm
Read	Fluorescence Endpoint
	Full Plate
	Filter Set 1
	Excitation: 425, Emission: 475
	Optics: Top, Gain: 100
	Light Source: Xenon Flash, Lamp Energy: High
	Read Speed: Normal, Delay: 100 msec, Measurements/Data Point: 10
	Read Height: 7 mm
End Kinetic
Layout
		1	2	3	4	5	6	7	8	9	10	11	12
	A	SPL1	SPL2	SPL3	SPL4	SPL5	SPL6	SPL7	SPL8	SPL9	SPL10	SPL11	SPL12	Well ID
	B	SPL1	SPL8	SPL15	SPL22	SPL29	SPL36	SPL43	SPL50	SPL57	SPL64	SPL71	SPL78	Well ID
	C	SPL2	SPL9	SPL16	SPL23	SPL30	SPL37	SPL44	SPL51	SPL58	SPL65	SPL72	SPL79	Well ID
	D	SPL3	SPL10	SPL17	SPL24	SPL31	SPL38	SPL45	SPL52	SPL59	SPL66	SPL73	SPL80	Well ID
	E	SPL4	SPL11	SPL18	SPL25	SPL32	SPL39	SPL46	SPL53	SPL60	SPL67	SPL74	SPL81	Well ID
	F	SPL5	SPL12	SPL19	SPL26	SPL33	SPL40	SPL47	SPL54	SPL61	SPL68	SPL75	SPL82	Well ID
	G	SPL6	SPL13	SPL20	SPL27	SPL34	SPL41	SPL48	SPL55	SPL62	SPL69	SPL76	SPL83	Well ID
	H	BLK	BLK	BLK	BLK	BLK	SPL42	SPL49	SPL56	SPL63	SPL70	SPL77	SPL84	Well ID
Read 1:600
	Time	T° Read 1:600	A1	A2	A3	A4	A5	A6	A7	A8	A9	A10	A11	A12	B1	B2	B3	B4	B5	B6	B7	B8	B9	B10	B11	B12	C1	C2	C3	C4	C5	C6	C7	C8	C9	C10	C11	C12	D1	D2	D3	D4	D5	D6	D7	D8	D9	D10	D11
	1899-12-31 00:08:27	37	0.084	0.084	0.083	0.084	0.085	0.084	0.084	0.084	0.084	0.088	0.083	0.085	0.084	0.083	0.082	0.086	0.084	0.083	0.084	0.084	0.083	0.085	0.085	0.084	0.084	0.083	0.083	0.084	0.083	0.083	0.084	0.083	0.084	0.083	0.084	0.089	0.084	0.084	0.083	0.084	0.083	0.083	0.084	0.084	0.083	0.083	0.083
	1899-12-31 00:18:27	37	0.084	0.084	0.083	0.084	0.085	0.083	0.083	0.083	0.084	0.087	0.083	0.085	0.084	0.083	0.083	0.085	0.083	0.083	0.083	0.084	0.082	0.085	0.085	0.083	0.084	0.083	0.083	0.083	0.083	0.084	0.083	0.083	0.083	0.083	0.083	0.088	0.083	0.084	0.083	0.084	0.083	0.082	0.084	0.083	0.083	0.083	0.084
	1899-12-31 00:28:27	37	0.084	0.084	0.083	0.083	0.084	0.083	0.083	0.082	0.083	0.087	0.083	0.085	0.083	0.083	0.082	0.085	0.083	0.083	0.083	0.084	0.083	0.083	0.085	0.083	0.084	0.082	0.083	0.083	0.083	0.083	0.083	0.083	0.083	0.083	0.082	0.088	0.084	0.084	0.083	0.083	0.082	0.082	0.083	0.083	0.084	0.082	0.083
	1899-12-31 00:38:27	37	0.084	0.083	0.083	0.084	0.084	0.084	0.083	0.083	0.083	0.087	0.083	0.085	0.083	0.083	0.082	0.085	0.082	0.083	0.083	0.083	0.083	0.083	0.084	0.083	0.083	0.082	0.083	0.083	0.082	0.084	0.084	0.082	0.082	0.083	0.082	0.088	0.083	0.083	0.082	0.083	0.083	0.082	0.083	0.083	0.083	0.082	0.083
	1899-12-31 00:48:27	37.1	0.083	0.083	0.082	0.083	0.084	0.084	0.083	0.083	0.082	0.087	0.082	0.085	0.083	0.082	0.082	0.085	0.082	0.083	0.083	0.083	0.083	0.082	0.083	0.083	0.083	0.082	0.083	0.083	0.082	0.084	0.083	0.082	0.082	0.083	0.083	0.088	0.083	0.083	0.082	0.083	0.082	0.082	0.083	0.083	0.083	0.082	0.082
	1899-12-31 00:58:27	37.1	0.083	0.083	0.082	0.083	0.084	0.084	0.082	0.083	0.082	0.087	0.083	0.085	0.082	0.082	0.082	0.084	0.082	0.082	0.083	0.082	0.082	0.083	0.083	0.083	0.083	0.082	0.082	0.082	0.082	0.083	0.083	0.082	0.082	0.083	0.082	0.088	0.083	0.083	0.082	0.083	0.082	0.081	0.083	0.083	0.082	0.082	0.082
	1899-12-31 01:08:27	37.1	0.083	0.083	0.082	0.083	0.084	0.084	0.083	0.083	0.082	0.087	0.082	0.084	0.083	0.083	0.082	0.084	0.082	0.082	0.083	0.083	0.082	0.083	0.083	0.083	0.083	0.082	0.082	0.082	0.082	0.083	0.083	0.082	0.082	0.083	0.083	0.088	0.083	0.083	0.082	0.083	0.083	0.082	0.083	0.083	0.083	0.083	0.082
	1899-12-31 01:18:27	37	0.084	0.084	0.083	0.083	0.084	0.085	0.083	0.083	0.083	0.088	0.083	0.085	0.083	0.083	0.083	0.085	0.083	0.083	0.083	0.083	0.083	0.083	0.083	0.083	0.083	0.083	0.083	0.083	0.083	0.084	0.084	0.083	0.083	0.085	0.083	0.088	0.083	0.084	0.082	0.083	0.083	0.082	0.084	0.083	0.083	0.083	0.083
	1899-12-31 01:28:27	37	0.084	0.084	0.083	0.083	0.084	0.085	0.083	0.083	0.083	0.087	0.083	0.085	0.083	0.083	0.082	0.085	0.083	0.083	0.083	0.083	0.083	0.083	0.083	0.083	0.084	0.082	0.083	0.083	0.083	0.084	0.084	0.082	0.083	0.083	0.084	0.089	0.083	0.084	0.082	0.083	0.083	0.082	0.084	0.083	0.083	0.083	0.083
	1899-12-31 01:38:27	37	0.084	0.083	0.083	0.083	0.084	0.085	0.083	0.083	0.083	0.087	0.083	0.085	0.083	0.083	0.082	0.085	0.083	0.083	0.084	0.083	0.083	0.083	0.084	0.083	0.084	0.083	0.083	0.083	0.082	0.083	0.083	0.082	0.083	0.083	0.083	0.089	0.083	0.083	0.082	0.083	0.083	0.082	0.084	0.083	0.083	0.083	0.082
	1899-12-31 01:48:27	37.1	0.083	0.083	0.082	0.083	0.084	0.085	0.083	0.083	0.083	0.087	0.083	0.085	0.083	0.083	0.082	0.085	0.083	0.083	0.083	0.083	0.083	0.083	0.083	0.083	0.083	0.082	0.082	0.083	0.083	0.083	0.083	0.082	0.083	0.083	0.083	0.088	0.083	0.083	0.082	0.083	0.082	0.082	0.084	0.083	0.083	0.083	0.082
	1899-12-31 01:58:27	37	0.083	0.083	0.082	0.083	0.084	0.085	0.083	0.083	0.083	0.087	0.083	0.085	0.083	0.083	0.082	0.084	0.083	0.083	0.083	0.083	0.082	0.082	0.084	0.083	0.084	0.082	0.082	0.083	0.083	0.083	0.084	0.082	0.082	0.083	0.083	0.088	0.083	0.083	0.082	0.083	0.082	0.082	0.083	0.083	0.083	0.083	0.082
	1899-12-31 02:08:27	37	0.084	0.083	0.083	0.083	0.084	0.085	0.083	0.083	0.083	0.087	0.083	0.085	0.083	0.083	0.082	0.085	0.083	0.083	0.083	0.083	0.083	0.083	0.084	0.083	0.083	0.082	0.083	0.083	0.082	0.083	0.084	0.082	0.082	0.083	0.083	0.088	0.083	0.083	0.082	0.083	0.083	0.082	0.084	0.083	0.083	0.083	0.082
	1899-12-31 02:18:27	37	0.084	0.083	0.083	0.084	0.084	0.086	0.084	0.083	0.083	0.087	0.083	0.086	0.083	0.083	0.083	0.085	0.083	0.084	0.084	0.083	0.083	0.083	0.084	0.083	0.084	0.083	0.083	0.083	0.083	0.084	0.084	0.083	0.083	0.084	0.084	0.089	0.084	0.084	0.082	0.083	0.083	0.083	0.084	0.084	0.084	0.083	0.083
	1899-12-31 02:28:27	37	0.084	0.083	0.083	0.084	0.084	0.086	0.084	0.083	0.083	0.087	0.083	0.085	0.083	0.083	0.082	0.085	0.083	0.084	0.084	0.083	0.083	0.083	0.084	0.083	0.084	0.083	0.083	0.083	0.083	0.084	0.084	0.082	0.083	0.084	0.083	0.089	0.084	0.083	0.083	0.083	0.083	0.083	0.085	0.083	0.084	0.084	0.083
	1899-12-31 02:38:27	37	0.084	0.084	0.083	0.083	0.084	0.085	0.084	0.083	0.083	0.087	0.083	0.085	0.083	0.083	0.082	0.085	0.083	0.084	0.084	0.083	0.083	0.083	0.083	0.083	0.084	0.082	0.083	0.083	0.083	0.084	0.084	0.082	0.083	0.083	0.083	0.089	0.084	0.084	0.082	0.083	0.083	0.083	0.084	0.083	0.083	0.084	0.083
	1899-12-31 02:48:27	37.1	0.084	0.083	0.082	0.083	0.084	0.085	0.084	0.083	0.083	0.087	0.083	0.085	0.083	0.083	0.082	0.085	0.083	0.083	0.084	0.083	0.083	0.083	0.083	0.083	0.083	0.082	0.082	0.083	0.083	0.083	0.084	0.082	0.083	0.083	0.083	0.089	0.084	0.084	0.082	0.083	0.082	0.083	0.084	0.083	0.084	0.083	0.082
	1899-12-31 02:58:27	37.1	0.083	0.083	0.082	0.083	0.086	0.085	0.083	0.083	0.083	0.087	0.083	0.085	0.083	0.083	0.082	0.085	0.083	0.083	0.084	0.083	0.082	0.083	0.083	0.083	0.083	0.082	0.082	0.082	0.083	0.083	0.084	0.082	0.082	0.083	0.083	0.089	0.084	0.083	0.082	0.083	0.083	0.083	0.084	0.083	0.084	0.083	0.083
	1899-12-31 03:08:27	37	0.083	0.083	0.083	0.084	0.086	0.086	0.084	0.083	0.083	0.088	0.083	0.086	0.083	0.083	0.082	0.085	0.083	0.084	0.084	0.083	0.083	0.083	0.084	0.083	0.084	0.083	0.083	0.083	0.083	0.084	0.084	0.082	0.083	0.083	0.083	0.089	0.084	0.084	0.082	0.083	0.083	0.083	0.084	0.083	0.084	0.084	0.083
	1899-12-31 03:18:27	37	0.084	0.084	0.083	0.084	0.087	0.086	0.084	0.083	0.083	0.088	0.084	0.086	0.084	0.083	0.083	0.085	0.083	0.084	0.084	0.083	0.083	0.083	0.084	0.084	0.084	0.083	0.083	0.083	0.083	0.085	0.085	0.083	0.083	0.084	0.083	0.09	0.084	0.084	0.083	0.083	0.083	0.084	0.085	0.083	0.084	0.084	0.083
	1899-12-31 03:28:27	37	0.084	0.084	0.083	0.084	0.086	0.086	0.084	0.084	0.083	0.087	0.083	0.086	0.083	0.084	0.083	0.085	0.083	0.085	0.085	0.083	0.083	0.083	0.084	0.084	0.083	0.083	0.083	0.083	0.083	0.084	0.085	0.082	0.083	0.083	0.083	0.089	0.084	0.084	0.082	0.083	0.083	0.083	0.085	0.083	0.084	0.084	0.084
	1899-12-31 03:38:27	37	0.084	0.084	0.083	0.084	0.086	0.086	0.084	0.083	0.083	0.087	0.083	0.086	0.083	0.083	0.082	0.085	0.083	0.084	0.085	0.084	0.083	0.083	0.084	0.084	0.084	0.083	0.083	0.083	0.083	0.084	0.084	0.082	0.083	0.083	0.083	0.089	0.084	0.084	0.082	0.083	0.083	0.083	0.085	0.083	0.084	0.084	0.084
	1899-12-31 03:48:27	37.1	0.083	0.084	0.083	0.084	0.086	0.086	0.084	0.083	0.083	0.087	0.083	0.086	0.083	0.083	0.082	0.085	0.083	0.084	0.084	0.083	0.083	0.083	0.084	0.084	0.083	0.083	0.083	0.083	0.083	0.084	0.084	0.082	0.083	0.083	0.083	0.089	0.084	0.084	0.082	0.083	0.083	0.083	0.085	0.083	0.084	0.084	0.083
	1899-12-31 03:58:27	37.1	0.083	0.084	0.082	0.083	0.085	0.086	0.085	0.083	0.083	0.087	0.083	0.086	0.083	0.083	0.082	0.085	0.083	0.084	0.084	0.083	0.082	0.083	0.084	0.084	0.083	0.083	0.083	0.083	0.083	0.084	0.085	0.082	0.083	0.083	0.083	0.089	0.084	0.083	0.082	0.083	0.083	0.084	0.085	0.083	0.084	0.084	0.083
	1899-12-31 04:08:27	37	0.084	0.084	0.083	0.084	0.085	0.087	0.085	0.083	0.083	0.087	0.083	0.087	0.084	0.084	0.083	0.085	0.084	0.085	0.085	0.084	0.083	0.083	0.084	0.084	0.084	0.083	0.083	0.083	0.084	0.085	0.085	0.082	0.083	0.084	0.083	0.09	0.085	0.084	0.083	0.083	0.083	0.084	0.085	0.083	0.085	0.084	0.084
	1899-12-31 04:18:27	37	0.084	0.084	0.083	0.084	0.085	0.087	0.085	0.084	0.083	0.088	0.083	0.087	0.084	0.084	0.083	0.085	0.084	0.085	0.085	0.083	0.083	0.083	0.084	0.085	0.084	0.083	0.083	0.084	0.083	0.085	0.085	0.083	0.083	0.084	0.084	0.09	0.085	0.084	0.083	0.083	0.083	0.084	0.086	0.083	0.085	0.085	0.084
	1899-12-31 04:28:27	37	0.084	0.084	0.083	0.084	0.085	0.087	0.086	0.083	0.083	0.088	0.083	0.086	0.084	0.084	0.083	0.085	0.084	0.085	0.085	0.083	0.083	0.083	0.084	0.085	0.084	0.083	0.083	0.083	0.083	0.085	0.085	0.082	0.083	0.083	0.083	0.09	0.085	0.084	0.082	0.083	0.083	0.084	0.086	0.083	0.085	0.085	0.084
	1899-12-31 04:38:27	37.1	0.084	0.084	0.083	0.084	0.085	0.087	0.086	0.083	0.083	0.087	0.083	0.087	0.084	0.084	0.082	0.085	0.084	0.085	0.085	0.083	0.083	0.083	0.084	0.085	0.083	0.083	0.083	0.083	0.084	0.085	0.085	0.082	0.083	0.083	0.083	0.09	0.085	0.084	0.082	0.083	0.083	0.084	0.085	0.083	0.085	0.085	0.084
	1899-12-31 04:48:27	37.1	0.084	0.084	0.083	0.084	0.085	0.087	0.086	0.083	0.083	0.087	0.083	0.087	0.084	0.084	0.082	0.085	0.084	0.085	0.085	0.083	0.083	0.083	0.084	0.085	0.083	0.083	0.083	0.083	0.083	0.085	0.085	0.082	0.082	0.083	0.083	0.09	0.085	0.083	0.082	0.083	0.083	0.084	0.086	0.083	0.084	0.085	0.084
	1899-12-31 04:58:27	37.1	0.084	0.084	0.083	0.084	0.085	0.087	0.086	0.083	0.083	0.087	0.083	0.087	0.084	0.084	0.082	0.085	0.084	0.085	0.085	0.083	0.082	0.083	0.084	0.085	0.083	0.083	0.083	0.083	0.083	0.085	0.085	0.082	0.082	0.083	0.083	0.09	0.085	0.084	0.082	0.083	0.082	0.084	0.086	0.083	0.084	0.085	0.084
	1899-12-31 05:08:27	37	0.084	0.085	0.084	0.084	0.086	0.087	0.086	0.084	0.083	0.087	0.084	0.087	0.084	0.084	0.083	0.085	0.084	0.086	0.086	0.083	0.083	0.083	0.084	0.086	0.084	0.083	0.083	0.083	0.084	0.086	0.086	0.082	0.083	0.083	0.083	0.091	0.086	0.084	0.083	0.083	0.083	0.085	0.086	0.083	0.085	0.085	0.084
	1899-12-31 05:18:27	37	0.084	0.085	0.083	0.084	0.086	0.088	0.086	0.084	0.083	0.088	0.084	0.088	0.084	0.084	0.083	0.086	0.085	0.086	0.086	0.083	0.083	0.083	0.085	0.086	0.084	0.083	0.083	0.084	0.084	0.086	0.086	0.082	0.083	0.085	0.083	0.091	0.086	0.084	0.082	0.083	0.083	0.085	0.087	0.083	0.085	0.086	0.085
	1899-12-31 05:28:27	37	0.084	0.085	0.084	0.084	0.086	0.088	0.086	0.083	0.083	0.087	0.084	0.088	0.084	0.084	0.083	0.085	0.085	0.086	0.086	0.083	0.083	0.083	0.084	0.086	0.084	0.083	0.083	0.084	0.084	0.086	0.086	0.082	0.083	0.083	0.083	0.091	0.086	0.084	0.082	0.083	0.083	0.085	0.086	0.083	0.085	0.086	0.085
	1899-12-31 05:38:27	37.1	0.084	0.085	0.083	0.084	0.086	0.088	0.086	0.084	0.083	0.087	0.084	0.088	0.085	0.084	0.083	0.085	0.084	0.086	0.086	0.083	0.083	0.083	0.084	0.086	0.084	0.084	0.083	0.083	0.084	0.086	0.086	0.082	0.082	0.083	0.083	0.091	0.086	0.084	0.082	0.083	0.083	0.085	0.087	0.083	0.086	0.086	0.085
	1899-12-31 05:48:27	37.1	0.084	0.084	0.083	0.084	0.086	0.088	0.086	0.083	0.083	0.087	0.084	0.088	0.084	0.084	0.083	0.085	0.084	0.086	0.086	0.083	0.082	0.083	0.084	0.086	0.084	0.084	0.083	0.083	0.084	0.086	0.086	0.082	0.082	0.084	0.083	0.091	0.086	0.084	0.082	0.083	0.082	0.085	0.087	0.083	0.086	0.086	0.085
	1899-12-31 05:58:27	37	0.084	0.085	0.083	0.084	0.086	0.089	0.087	0.083	0.083	0.087	0.083	0.088	0.084	0.084	0.083	0.085	0.084	0.086	0.087	0.083	0.082	0.083	0.084	0.086	0.084	0.084	0.083	0.083	0.084	0.086	0.086	0.082	0.082	0.083	0.083	0.092	0.086	0.084	0.082	0.083	0.082	0.086	0.087	0.083	0.085	0.086	0.085
	1899-12-31 06:08:27	37	0.085	0.085	0.083	0.085	0.086	0.089	0.088	0.084	0.083	0.088	0.084	0.089	0.085	0.085	0.083	0.086	0.085	0.087	0.087	0.083	0.083	0.083	0.084	0.087	0.085	0.084	0.084	0.084	0.084	0.087	0.087	0.082	0.083	0.084	0.084	0.092	0.087	0.084	0.083	0.083	0.083	0.086	0.088	0.083	0.086	0.086	0.086
	1899-12-31 06:18:27	37	0.085	0.085	0.084	0.085	0.087	0.09	0.088	0.084	0.083	0.088	0.084	0.089	0.086	0.085	0.083	0.086	0.085	0.088	0.088	0.084	0.083	0.083	0.084	0.087	0.085	0.085	0.083	0.084	0.085	0.087	0.087	0.082	0.083	0.083	0.084	0.093	0.087	0.084	0.083	0.083	0.083	0.087	0.088	0.083	0.086	0.087	0.086
	1899-12-31 06:28:27	37	0.085	0.086	0.084	0.085	0.087	0.09	0.088	0.084	0.083	0.087	0.084	0.089	0.085	0.085	0.083	0.086	0.085	0.088	0.088	0.083	0.083	0.083	0.084	0.088	0.085	0.085	0.083	0.084	0.085	0.087	0.088	0.082	0.083	0.083	0.083	0.093	0.087	0.085	0.082	0.083	0.083	0.087	0.088	0.083	0.086	0.087	0.086
	1899-12-31 06:38:27	37	0.086	0.086	0.084	0.084	0.087	0.09	0.088	0.084	0.083	0.088	0.084	0.089	0.085	0.085	0.083	0.086	0.085	0.088	0.088	0.083	0.083	0.083	0.084	0.087	0.085	0.085	0.084	0.084	0.085	0.087	0.088	0.082	0.083	0.083	0.084	0.093	0.087	0.084	0.083	0.083	0.083	0.088	0.088	0.083	0.086	0.087	0.086
	1899-12-31 06:48:27	37	0.086	0.086	0.083	0.084	0.087	0.09	0.088	0.083	0.083	0.087	0.083	0.089	0.086	0.086	0.083	0.086	0.085	0.088	0.088	0.083	0.082	0.083	0.084	0.088	0.085	0.085	0.084	0.084	0.085	0.088	0.088	0.082	0.083	0.083	0.083	0.093	0.088	0.084	0.082	0.083	0.082	0.088	0.089	0.083	0.087	0.088	0.087
	1899-12-31 06:58:27	37.1	0.086	0.086	0.083	0.084	0.087	0.09	0.088	0.083	0.083	0.087	0.083	0.089	0.085	0.085	0.083	0.086	0.085	0.089	0.089	0.083	0.082	0.082	0.084	0.088	0.085	0.085	0.083	0.084	0.085	0.088	0.088	0.082	0.083	0.083	0.083	0.093	0.088	0.084	0.082	0.083	0.083	0.088	0.089	0.083	0.087	0.088	0.087
	1899-12-31 07:08:27	37	0.086	0.087	0.084	0.085	0.087	0.091	0.089	0.084	0.083	0.087	0.084	0.09	0.086	0.086	0.084	0.086	0.086	0.089	0.09	0.083	0.083	0.083	0.084	0.089	0.086	0.085	0.084	0.085	0.085	0.089	0.089	0.083	0.083	0.084	0.084	0.094	0.089	0.085	0.082	0.083	0.083	0.089	0.09	0.083	0.087	0.088	0.088
	1899-12-31 07:18:27	37	0.087	0.087	0.084	0.085	0.088	0.092	0.09	0.084	0.084	0.088	0.084	0.091	0.086	0.087	0.084	0.086	0.086	0.09	0.09	0.084	0.083	0.083	0.085	0.089	0.086	0.086	0.084	0.085	0.086	0.089	0.09	0.083	0.083	0.083	0.083	0.095	0.09	0.085	0.083	0.083	0.083	0.089	0.091	0.083	0.088	0.089	0.088
	1899-12-31 07:28:27	37	0.087	0.087	0.084	0.085	0.088	0.092	0.091	0.084	0.083	0.088	0.084	0.091	0.087	0.087	0.084	0.087	0.086	0.09	0.091	0.083	0.083	0.083	0.084	0.09	0.086	0.087	0.084	0.085	0.086	0.09	0.09	0.082	0.083	0.083	0.084	0.096	0.09	0.085	0.083	0.083	0.083	0.09	0.091	0.083	0.088	0.09	0.089
	1899-12-31 07:38:27	37.1	0.087	0.088	0.084	0.085	0.088	0.093	0.091	0.083	0.083	0.087	0.084	0.091	0.087	0.087	0.084	0.086	0.086	0.091	0.091	0.083	0.083	0.083	0.085	0.09	0.087	0.087	0.084	0.085	0.085	0.09	0.091	0.083	0.083	0.083	0.083	0.096	0.09	0.085	0.082	0.083	0.083	0.091	0.092	0.083	0.088	0.09	0.089
	1899-12-31 07:48:27	37.1	0.087	0.088	0.084	0.085	0.088	0.094	0.091	0.083	0.083	0.087	0.084	0.092	0.087	0.087	0.084	0.086	0.086	0.092	0.091	0.083	0.083	0.083	0.084	0.091	0.087	0.087	0.084	0.085	0.085	0.09	0.091	0.082	0.083	0.083	0.083	0.096	0.091	0.085	0.082	0.083	0.083	0.092	0.093	0.083	0.088	0.091	0.09
	1899-12-31 07:58:27	37	0.088	0.088	0.084	0.085	0.087	0.094	0.092	0.083	0.083	0.087	0.084	0.093	0.087	0.088	0.084	0.086	0.086	0.092	0.092	0.083	0.082	0.083	0.084	0.091	0.087	0.087	0.085	0.085	0.085	0.091	0.091	0.082	0.082	0.083	0.083	0.097	0.091	0.085	0.082	0.083	0.083	0.092	0.094	0.083	0.088	0.091	0.091
	1899-12-31 08:08:27	37	0.088	0.089	0.085	0.086	0.088	0.095	0.093	0.083	0.083	0.088	0.084	0.094	0.088	0.089	0.085	0.087	0.086	0.094	0.094	0.083	0.083	0.083	0.084	0.092	0.088	0.088	0.085	0.086	0.086	0.092	0.092	0.082	0.082	0.083	0.084	0.098	0.092	0.085	0.082	0.083	0.083	0.094	0.095	0.083	0.089	0.092	0.092
	1899-12-31 08:18:27	37	0.089	0.09	0.085	0.086	0.088	0.096	0.095	0.084	0.084	0.088	0.084	0.095	0.089	0.089	0.085	0.088	0.087	0.095	0.095	0.083	0.083	0.083	0.085	0.093	0.089	0.089	0.086	0.086	0.086	0.093	0.093	0.083	0.083	0.084	0.084	0.099	0.093	0.086	0.083	0.083	0.083	0.095	0.096	0.083	0.09	0.093	0.093
	1899-12-31 08:28:27	37	0.09	0.091	0.085	0.087	0.088	0.097	0.096	0.084	0.084	0.088	0.084	0.095	0.09	0.09	0.085	0.088	0.086	0.095	0.096	0.084	0.083	0.083	0.084	0.094	0.089	0.09	0.086	0.086	0.086	0.094	0.094	0.082	0.083	0.083	0.084	0.099	0.093	0.086	0.082	0.083	0.083	0.097	0.098	0.083	0.09	0.094	0.095
	1899-12-31 08:38:27	37	0.091	0.091	0.086	0.087	0.088	0.098	0.097	0.083	0.084	0.088	0.084	0.096	0.09	0.09	0.086	0.088	0.087	0.096	0.097	0.083	0.083	0.083	0.084	0.094	0.09	0.09	0.086	0.087	0.086	0.095	0.095	0.083	0.083	0.083	0.084	0.101	0.094	0.086	0.083	0.083	0.083	0.098	0.1	0.083	0.09	0.095	0.096
	1899-12-31 08:48:27	37	0.091	0.092	0.086	0.087	0.088	0.1	0.098	0.084	0.084	0.087	0.083	0.097	0.091	0.092	0.086	0.088	0.086	0.097	0.097	0.083	0.083	0.083	0.085	0.095	0.09	0.091	0.086	0.087	0.085	0.096	0.096	0.082	0.083	0.083	0.083	0.101	0.095	0.086	0.082	0.083	0.083	0.1	0.102	0.082	0.09	0.096	0.097
	1899-12-31 08:58:27	37.1	0.092	0.093	0.086	0.087	0.088	0.101	0.099	0.083	0.083	0.087	0.084	0.098	0.092	0.092	0.086	0.088	0.086	0.098	0.098	0.083	0.083	0.083	0.084	0.096	0.091	0.092	0.087	0.087	0.085	0.096	0.097	0.082	0.082	0.083	0.083	0.103	0.096	0.086	0.082	0.083	0.083	0.102	0.103	0.083	0.091	0.098	0.098
	1899-12-31 09:08:27	37.1	0.093	0.094	0.086	0.088	0.088	0.103	0.101	0.083	0.083	0.087	0.083	0.1	0.092	0.093	0.086	0.089	0.086	0.1	0.1	0.083	0.083	0.083	0.084	0.098	0.092	0.094	0.087	0.088	0.086	0.099	0.098	0.082	0.082	0.083	0.083	0.104	0.097	0.086	0.082	0.083	0.083	0.103	0.105	0.083	0.091	0.099	0.099
	1899-12-31 09:18:27	37	0.094	0.095	0.087	0.088	0.088	0.104	0.103	0.083	0.084	0.088	0.084	0.102	0.094	0.095	0.087	0.09	0.087	0.102	0.102	0.083	0.083	0.083	0.085	0.1	0.094	0.095	0.088	0.089	0.086	0.1	0.1	0.082	0.083	0.083	0.084	0.106	0.099	0.087	0.083	0.083	0.083	0.105	0.107	0.083	0.093	0.101	0.101
	1899-12-31 09:28:27	37	0.095	0.097	0.088	0.089	0.088	0.106	0.106	0.084	0.084	0.087	0.084	0.105	0.095	0.096	0.088	0.09	0.086	0.103	0.103	0.083	0.083	0.083	0.085	0.101	0.095	0.096	0.089	0.09	0.086	0.102	0.101	0.082	0.083	0.083	0.084	0.108	0.1	0.087	0.083	0.083	0.083	0.107	0.11	0.083	0.094	0.101	0.102
	1899-12-31 09:38:27	37	0.097	0.098	0.088	0.089	0.088	0.108	0.108	0.083	0.084	0.088	0.084	0.106	0.096	0.097	0.089	0.091	0.087	0.104	0.104	0.084	0.083	0.083	0.085	0.103	0.095	0.098	0.09	0.09	0.086	0.105	0.103	0.082	0.083	0.084	0.084	0.111	0.101	0.087	0.082	0.083	0.083	0.109	0.111	0.083	0.094	0.102	0.105
	1899-12-31 09:48:27	37.1	0.098	0.1	0.088	0.09	0.088	0.111	0.11	0.083	0.084	0.087	0.084	0.108	0.098	0.098	0.089	0.091	0.086	0.105	0.106	0.083	0.083	0.083	0.085	0.105	0.097	0.099	0.09	0.091	0.086	0.104	0.104	0.082	0.083	0.083	0.084	0.113	0.103	0.087	0.082	0.083	0.083	0.112	0.114	0.083	0.095	0.104	0.105
	1899-12-31 09:58:27	37	0.1	0.101	0.089	0.091	0.088	0.114	0.113	0.083	0.083	0.087	0.084	0.111	0.099	0.099	0.09	0.092	0.086	0.107	0.107	0.083	0.082	0.083	0.085	0.108	0.099	0.1	0.091	0.092	0.086	0.108	0.107	0.082	0.083	0.083	0.083	0.117	0.104	0.087	0.082	0.083	0.083	0.114	0.118	0.083	0.096	0.106	0.107
	1899-12-31 10:08:27	37.1	0.101	0.103	0.089	0.091	0.088	0.117	0.116	0.083	0.083	0.087	0.083	0.113	0.1	0.101	0.091	0.093	0.086	0.108	0.109	0.083	0.082	0.083	0.085	0.11	0.1	0.102	0.092	0.092	0.085	0.109	0.109	0.082	0.083	0.083	0.084	0.118	0.105	0.087	0.082	0.083	0.082	0.117	0.118	0.083	0.097	0.11	0.108
	1899-12-31 10:18:27	37	0.103	0.105	0.091	0.092	0.088	0.12	0.119	0.083	0.083	0.087	0.084	0.115	0.102	0.103	0.092	0.094	0.087	0.11	0.111	0.083	0.083	0.083	0.085	0.113	0.102	0.104	0.093	0.094	0.086	0.111	0.112	0.083	0.083	0.083	0.084	0.122	0.108	0.088	0.083	0.083	0.083	0.122	0.123	0.083	0.098	0.112	0.111
	1899-12-31 10:28:27	37	0.105	0.108	0.091	0.094	0.088	0.119	0.121	0.083	0.084	0.087	0.084	0.118	0.104	0.105	0.093	0.095	0.087	0.113	0.113	0.083	0.083	0.083	0.085	0.116	0.104	0.107	0.094	0.096	0.086	0.114	0.114	0.082	0.083	0.084	0.084	0.125	0.11	0.089	0.083	0.083	0.083	0.126	0.127	0.083	0.099	0.115	0.115
	1899-12-31 10:38:27	37	0.107	0.111	0.093	0.095	0.088	0.12	0.122	0.083	0.083	0.087	0.084	0.12	0.106	0.107	0.094	0.096	0.087	0.116	0.114	0.083	0.083	0.084	0.085	0.118	0.107	0.109	0.095	0.096	0.086	0.115	0.116	0.082	0.083	0.083	0.084	0.128	0.112	0.089	0.083	0.083	0.083	0.128	0.13	0.083	0.1	0.116	0.121
	1899-12-31 10:48:27	37	0.111	0.114	0.094	0.096	0.088	0.122	0.124	0.083	0.083	0.087	0.084	0.122	0.109	0.11	0.095	0.097	0.086	0.118	0.116	0.083	0.083	0.083	0.085	0.121	0.11	0.113	0.096	0.097	0.086	0.117	0.118	0.082	0.083	0.083	0.084	0.13	0.114	0.09	0.082	0.083	0.083	0.134	0.136	0.083	0.101	0.122	0.127
	1899-12-31 10:58:27	37.1	0.114	0.117	0.095	0.097	0.088	0.124	0.124	0.083	0.084	0.087	0.083	0.124	0.111	0.113	0.096	0.098	0.086	0.12	0.12	0.083	0.082	0.083	0.085	0.122	0.113	0.116	0.097	0.097	0.086	0.12	0.12	0.082	0.083	0.083	0.084	0.131	0.117	0.09	0.082	0.083	0.083	0.141	0.141	0.083	0.103	0.127	0.133
	1899-12-31 11:08:27	37.1	0.117	0.12	0.095	0.097	0.088	0.126	0.127	0.083	0.083	0.087	0.083	0.125	0.115	0.116	0.097	0.099	0.086	0.123	0.123	0.083	0.082	0.083	0.085	0.123	0.117	0.121	0.099	0.098	0.085	0.123	0.122	0.082	0.083	0.084	0.083	0.133	0.119	0.09	0.082	0.083	0.083	0.15	0.151	0.083	0.103	0.135	0.141
	1899-12-31 11:18:27	37	0.12	0.125	0.097	0.099	0.088	0.13	0.13	0.083	0.083	0.087	0.083	0.127	0.118	0.121	0.098	0.1	0.086	0.128	0.127	0.083	0.083	0.083	0.085	0.126	0.121	0.125	0.101	0.099	0.085	0.126	0.126	0.082	0.083	0.083	0.084	0.133	0.123	0.091	0.082	0.083	0.083	0.156	0.157	0.083	0.105	0.142	0.148
	1899-12-31 11:28:27	37	0.124	0.131	0.099	0.1	0.089	0.135	0.135	0.083	0.083	0.087	0.084	0.131	0.123	0.126	0.1	0.101	0.087	0.134	0.132	0.083	0.083	0.083	0.085	0.13	0.127	0.13	0.103	0.099	0.086	0.128	0.127	0.083	0.083	0.083	0.084	0.136	0.127	0.092	0.083	0.083	0.083	0.162	0.162	0.084	0.105	0.151	0.158
	1899-12-31 11:38:27	37	0.128	0.133	0.101	0.1	0.088	0.139	0.139	0.083	0.083	0.088	0.084	0.135	0.127	0.131	0.102	0.101	0.087	0.138	0.137	0.084	0.083	0.083	0.085	0.136	0.132	0.135	0.105	0.1	0.086	0.131	0.131	0.083	0.083	0.084	0.084	0.14	0.13	0.092	0.083	0.083	0.083	0.169	0.169	0.083	0.108	0.16	0.165
	1899-12-31 11:48:27	37	0.132	0.14	0.102	0.1	0.088	0.145	0.145	0.083	0.083	0.087	0.084	0.139	0.132	0.137	0.104	0.102	0.086	0.144	0.142	0.083	0.083	0.083	0.085	0.141	0.138	0.141	0.107	0.1	0.086	0.136	0.135	0.083	0.083	0.083	0.084	0.146	0.132	0.093	0.083	0.083	0.083	0.171	0.172	0.083	0.109	0.169	0.167
	1899-12-31 11:58:27	37.1	0.138	0.146	0.104	0.101	0.088	0.151	0.15	0.083	0.083	0.087	0.084	0.144	0.137	0.142	0.107	0.102	0.086	0.149	0.148	0.083	0.083	0.083	0.085	0.146	0.143	0.147	0.11	0.1	0.086	0.141	0.141	0.082	0.083	0.084	0.084	0.151	0.137	0.093	0.083	0.083	0.083	0.177	0.177	0.083	0.109	0.177	0.17
	1899-12-31 12:08:27	37.1	0.143	0.152	0.106	0.101	0.088	0.159	0.156	0.083	0.083	0.087	0.084	0.149	0.143	0.148	0.109	0.102	0.086	0.155	0.153	0.083	0.083	0.083	0.085	0.15	0.15	0.155	0.113	0.1	0.086	0.147	0.147	0.082	0.082	0.083	0.084	0.158	0.141	0.093	0.082	0.083	0.083	0.181	0.182	0.083	0.111	0.179	0.173
	1899-12-31 12:18:27	37	0.15	0.161	0.109	0.101	0.088	0.164	0.163	0.083	0.083	0.087	0.083	0.156	0.15	0.156	0.112	0.103	0.086	0.16	0.159	0.083	0.083	0.083	0.085	0.156	0.158	0.164	0.116	0.1	0.086	0.154	0.154	0.082	0.082	0.083	0.083	0.165	0.144	0.094	0.082	0.083	0.083	0.187	0.189	0.083	0.112	0.184	0.177
	1899-12-31 12:28:27	37	0.157	0.171	0.112	0.101	0.088	0.17	0.17	0.083	0.084	0.087	0.084	0.164	0.156	0.164	0.116	0.103	0.087	0.167	0.165	0.083	0.083	0.084	0.085	0.161	0.165	0.176	0.119	0.101	0.086	0.161	0.16	0.083	0.083	0.084	0.084	0.172	0.15	0.096	0.083	0.083	0.083	0.192	0.195	0.083	0.114	0.188	0.182
	1899-12-31 12:38:27	37	0.166	0.183	0.116	0.101	0.088	0.176	0.178	0.084	0.083	0.088	0.084	0.172	0.164	0.172	0.118	0.104	0.087	0.173	0.17	0.083	0.083	0.084	0.085	0.167	0.174	0.182	0.12	0.101	0.086	0.167	0.167	0.083	0.083	0.083	0.084	0.179	0.155	0.097	0.083	0.083	0.083	0.189	0.194	0.083	0.116	0.19	0.189
	1899-12-31 12:48:27	37	0.176	0.196	0.118	0.102	0.088	0.184	0.184	0.084	0.083	0.087	0.084	0.181	0.17	0.179	0.119	0.104	0.087	0.18	0.176	0.083	0.083	0.083	0.085	0.174	0.181	0.19	0.121	0.101	0.086	0.173	0.173	0.083	0.083	0.083	0.084	0.189	0.16	0.098	0.083	0.083	0.083	0.2	0.205	0.083	0.117	0.196	0.193
	1899-12-31 12:58:27	37.1	0.186	0.201	0.12	0.101	0.088	0.193	0.191	0.083	0.083	0.087	0.084	0.19	0.182	0.191	0.12	0.104	0.086	0.188	0.184	0.083	0.083	0.083	0.085	0.179	0.187	0.193	0.121	0.101	0.086	0.181	0.181	0.082	0.083	0.084	0.084	0.198	0.167	0.099	0.083	0.083	0.083	0.207	0.214	0.083	0.118	0.202	0.207
	1899-12-31 13:08:27	37.1	0.199	0.207	0.121	0.102	0.088	0.195	0.193	0.083	0.083	0.087	0.084	0.196	0.186	0.2	0.12	0.103	0.086	0.194	0.191	0.083	0.083	0.083	0.085	0.18	0.198	0.205	0.121	0.101	0.086	0.19	0.19	0.082	0.083	0.083	0.084	0.208	0.174	0.1	0.082	0.083	0.083	0.213	0.219	0.083	0.118	0.207	0.22
	1899-12-31 13:18:27	37.1	0.212	0.212	0.122	0.101	0.087	0.2	0.198	0.083	0.083	0.087	0.083	0.208	0.197	0.208	0.12	0.103	0.086	0.2	0.195	0.083	0.083	0.083	0.085	0.187	0.205	0.213	0.121	0.1	0.086	0.196	0.197	0.082	0.083	0.083	0.084	0.215	0.176	0.102	0.082	0.083	0.083	0.222	0.227	0.083	0.12	0.212	0.234
	1899-12-31 13:28:27	37	0.222	0.217	0.122	0.102	0.088	0.206	0.202	0.083	0.083	0.087	0.084	0.218	0.2	0.214	0.121	0.104	0.086	0.203	0.196	0.083	0.083	0.083	0.085	0.194	0.216	0.22	0.121	0.101	0.086	0.201	0.202	0.082	0.083	0.083	0.084	0.225	0.189	0.103	0.083	0.083	0.083	0.228	0.234	0.083	0.122	0.217	0.236
	1899-12-31 13:38:27	37	0.23	0.226	0.122	0.102	0.088	0.218	0.215	0.084	0.083	0.087	0.084	0.229	0.209	0.224	0.121	0.104	0.087	0.201	0.198	0.083	0.083	0.084	0.085	0.199	0.227	0.233	0.122	0.101	0.086	0.207	0.205	0.083	0.083	0.084	0.084	0.23	0.188	0.105	0.083	0.084	0.083	0.249	0.256	0.084	0.126	0.232	0.235
	1899-12-31 13:48:27	37	0.254	0.239	0.121	0.102	0.088	0.223	0.224	0.083	0.084	0.087	0.084	0.244	0.219	0.226	0.121	0.104	0.087	0.215	0.211	0.084	0.083	0.084	0.085	0.206	0.242	0.232	0.122	0.101	0.086	0.209	0.208	0.083	0.083	0.083	0.084	0.243	0.199	0.106	0.083	0.083	0.083	0.255	0.261	0.083	0.13	0.248	0.252
	1899-12-31 13:58:27	37	0.277	0.258	0.122	0.102	0.088	0.228	0.224	0.083	0.083	0.087	0.084	0.255	0.226	0.238	0.121	0.103	0.086	0.219	0.218	0.083	0.083	0.083	0.085	0.215	0.253	0.239	0.122	0.1	0.086	0.212	0.21	0.083	0.083	0.083	0.084	0.249	0.206	0.108	0.083	0.083	0.083	0.267	0.271	0.083	0.134	0.258	0.262
	1899-12-31 14:08:27	37.1	0.285	0.262	0.122	0.101	0.088	0.233	0.228	0.083	0.083	0.087	0.084	0.263	0.236	0.234	0.121	0.103	0.086	0.219	0.212	0.083	0.083	0.084	0.084	0.224	0.254	0.243	0.122	0.101	0.086	0.217	0.213	0.083	0.083	0.083	0.084	0.261	0.216	0.109	0.082	0.083	0.083	0.27	0.274	0.083	0.139	0.259	0.27
	1899-12-31 14:18:27	37.1	0.302	0.265	0.122	0.101	0.088	0.241	0.239	0.083	0.083	0.087	0.084	0.273	0.242	0.241	0.121	0.103	0.086	0.228	0.226	0.083	0.082	0.084	0.084	0.228	0.255	0.249	0.123	0.1	0.086	0.218	0.217	0.082	0.083	0.083	0.083	0.27	0.223	0.111	0.083	0.083	0.083	0.283	0.291	0.083	0.144	0.273	0.28
	1899-12-31 14:28:27	37	0.307	0.267	0.122	0.101	0.088	0.243	0.242	0.083	0.083	0.087	0.084	0.285	0.247	0.245	0.121	0.103	0.086	0.229	0.231	0.083	0.083	0.083	0.084	0.229	0.259	0.253	0.122	0.1	0.086	0.224	0.221	0.082	0.083	0.083	0.084	0.281	0.23	0.113	0.083	0.083	0.083	0.289	0.295	0.083	0.151	0.275	0.286
	1899-12-31 14:38:27	37	0.336	0.274	0.122	0.102	0.088	0.263	0.263	0.083	0.083	0.087	0.084	0.306	0.257	0.251	0.121	0.103	0.087	0.237	0.235	0.084	0.083	0.084	0.085	0.236	0.269	0.256	0.124	0.101	0.086	0.232	0.232	0.082	0.083	0.084	0.084	0.296	0.24	0.115	0.083	0.083	0.083	0.298	0.306	0.083	0.156	0.282	0.293
	1899-12-31 14:48:27	37	0.346	0.277	0.123	0.102	0.088	0.279	0.273	0.083	0.083	0.087	0.084	0.321	0.266	0.25	0.122	0.104	0.087	0.244	0.238	0.083	0.083	0.084	0.085	0.241	0.282	0.257	0.123	0.101	0.086	0.237	0.233	0.082	0.083	0.084	0.084	0.309	0.247	0.117	0.083	0.099	0.083	0.311	0.321	0.083	0.162	0.291	0.301
	1899-12-31 14:58:27	37	0.353	0.28	0.123	0.101	0.088	0.299	0.294	0.083	0.083	0.087	0.084	0.326	0.271	0.256	0.122	0.103	0.087	0.241	0.24	0.083	0.083	0.084	0.085	0.242	0.292	0.26	0.124	0.101	0.086	0.242	0.246	0.082	0.083	0.083	0.084	0.317	0.253	0.119	0.083	0.099	0.083	0.319	0.323	0.083	0.172	0.307	0.311
	1899-12-31 15:08:27	37	0.368	0.285	0.123	0.101	0.088	0.313	0.309	0.083	0.083	0.087	0.084	0.346	0.283	0.256	0.121	0.103	0.087	0.25	0.254	0.083	0.083	0.084	0.085	0.252	0.298	0.258	0.123	0.101	0.086	0.252	0.249	0.082	0.083	0.083	0.084	0.333	0.264	0.121	0.083	0.099	0.083	0.318	0.324	0.083	0.177	0.308	0.319
	1899-12-31 15:18:27	37.1	0.376	0.289	0.123	0.101	0.088	0.327	0.327	0.083	0.083	0.087	0.083	0.359	0.29	0.26	0.121	0.103	0.087	0.256	0.252	0.083	0.083	0.084	0.084	0.264	0.31	0.259	0.123	0.1	0.086	0.266	0.261	0.082	0.083	0.083	0.084	0.344	0.274	0.123	0.083	0.099	0.083	0.34	0.347	0.083	0.183	0.32	0.326
	1899-12-31 15:28:27	37	0.393	0.296	0.123	0.101	0.088	0.346	0.346	0.083	0.083	0.087	0.084	0.386	0.305	0.262	0.12	0.103	0.086	0.261	0.254	0.083	0.082	0.083	0.084	0.282	0.323	0.262	0.123	0.1	0.086	0.282	0.278	0.082	0.083	0.083	0.084	0.364	0.281	0.126	0.082	0.099	0.083	0.343	0.352	0.083	0.188	0.33	0.338
	1899-12-31 15:38:27	37	0.396	0.303	0.123	0.101	0.088	0.353	0.356	0.083	0.083	0.087	0.084	0.396	0.298	0.262	0.121	0.103	0.087	0.262	0.262	0.083	0.083	0.083	0.084	0.287	0.321	0.266	0.123	0.1	0.086	0.291	0.284	0.082	0.083	0.083	0.084	0.371	0.284	0.128	0.083	0.099	0.083	0.344	0.353	0.083	0.194	0.335	0.343
	1899-12-31 15:48:27	37	0.419	0.311	0.123	0.102	0.089	0.369	0.37	0.084	0.084	0.087	0.084	0.413	0.326	0.263	0.12	0.103	0.087	0.266	0.265	0.083	0.083	0.084	0.085	0.312	0.352	0.27	0.124	0.1	0.086	0.3	0.299	0.083	0.083	0.084	0.084	0.389	0.304	0.131	0.083	0.099	0.083	0.353	0.362	0.083	0.197	0.346	0.351
	1899-12-31 15:58:27	37	0.419	0.317	0.123	0.102	0.088	0.375	0.379	0.084	0.084	0.088	0.084	0.424	0.327	0.266	0.12	0.103	0.087	0.27	0.269	0.084	0.083	0.084	0.085	0.323	0.346	0.274	0.124	0.101	0.086	0.315	0.312	0.083	0.083	0.083	0.084	0.396	0.303	0.133	0.083	0.1	0.083	0.364	0.371	0.084	0.198	0.357	0.362
	1899-12-31 16:08:27	37	0.427	0.324	0.122	0.101	0.088	0.392	0.394	0.083	0.084	0.087	0.084	0.441	0.325	0.268	0.12	0.103	0.087	0.276	0.274	0.083	0.083	0.084	0.084	0.354	0.352	0.276	0.123	0.1	0.086	0.322	0.322	0.083	0.083	0.083	0.084	0.409	0.326	0.136	0.083	0.099	0.083	0.368	0.379	0.083	0.204	0.364	0.365
	1899-12-31 16:18:27	37.1	0.441	0.335	0.123	0.101	0.088	0.408	0.409	0.083	0.083	0.087	0.084	0.458	0.331	0.273	0.12	0.103	0.087	0.284	0.277	0.083	0.083	0.084	0.085	0.376	0.356	0.279	0.123	0.1	0.086	0.332	0.332	0.082	0.083	0.083	0.083	0.419	0.341	0.139	0.083	0.1	0.083	0.379	0.388	0.083	0.213	0.37	0.371
	1899-12-31 16:28:27	37.1	0.447	0.34	0.122	0.101	0.088	0.411	0.413	0.083	0.084	0.087	0.084	0.462	0.33	0.279	0.12	0.103	0.087	0.298	0.285	0.083	0.083	0.084	0.084	0.378	0.361	0.282	0.124	0.1	0.086	0.345	0.345	0.083	0.083	0.083	0.084	0.437	0.339	0.141	0.083	0.099	0.083	0.388	0.397	0.083	0.22	0.374	0.379
	1899-12-31 16:38:27	37	0.455	0.348	0.122	0.101	0.088	0.422	0.425	0.083	0.083	0.087	0.084	0.477	0.334	0.283	0.119	0.103	0.087	0.317	0.3	0.083	0.082	0.084	0.084	0.396	0.37	0.286	0.123	0.1	0.086	0.352	0.36	0.082	0.083	0.083	0.084	0.447	0.359	0.146	0.083	0.099	0.083	0.391	0.398	0.083	0.229	0.388	0.39
	1899-12-31 16:48:27	37	0.457	0.349	0.122	0.101	0.088	0.421	0.425	0.083	0.083	0.087	0.084	0.48	0.335	0.288	0.119	0.103	0.087	0.33	0.303	0.083	0.083	0.084	0.084	0.391	0.374	0.29	0.123	0.101	0.086	0.358	0.362	0.082	0.083	0.083	0.084	0.446	0.344	0.15	0.083	0.099	0.083	0.395	0.405	0.083	0.239	0.39	0.397
	1899-12-31 16:58:27	37	0.468	0.36	0.122	0.102	0.088	0.436	0.436	0.084	0.084	0.088	0.084	0.493	0.343	0.296	0.119	0.103	0.087	0.349	0.326	0.084	0.083	0.084	0.085	0.411	0.384	0.296	0.124	0.101	0.086	0.367	0.378	0.082	0.083	0.084	0.084	0.458	0.362	0.155	0.083	0.1	0.084	0.401	0.409	0.083	0.248	0.403	0.403
	1899-12-31 17:08:27	37	0.48	0.37	0.122	0.102	0.088	0.452	0.452	0.084	0.084	0.088	0.084	0.51	0.35	0.301	0.12	0.103	0.087	0.349	0.332	0.083	0.083	0.084	0.085	0.426	0.395	0.301	0.124	0.101	0.086	0.374	0.382	0.082	0.084	0.083	0.084	0.468	0.376	0.159	0.083	0.099	0.084	0.409	0.417	0.083	0.26	0.402	0.407
	1899-12-31 17:18:27	37	0.486	0.375	0.123	0.102	0.088	0.456	0.452	0.084	0.084	0.087	0.084	0.518	0.359	0.309	0.119	0.103	0.087	0.363	0.354	0.083	0.083	0.084	0.085	0.424	0.403	0.307	0.124	0.1	0.086	0.389	0.401	0.082	0.083	0.083	0.084	0.475	0.374	0.172	0.083	0.099	0.083	0.419	0.427	0.083	0.266	0.419	0.415
	1899-12-31 17:28:27	37.1	0.494	0.38	0.122	0.101	0.088	0.467	0.462	0.083	0.083	0.087	0.084	0.531	0.367	0.311	0.119	0.103	0.087	0.375	0.368	0.083	0.083	0.084	0.084	0.435	0.41	0.31	0.124	0.1	0.086	0.39	0.4	0.082	0.083	0.083	0.084	0.48	0.385	0.175	0.083	0.099	0.083	0.422	0.43	0.083	0.275	0.419	0.424
	1899-12-31 17:38:27	37.1	0.503	0.388	0.123	0.101	0.088	0.477	0.474	0.083	0.083	0.087	0.084	0.548	0.381	0.314	0.119	0.103	0.087	0.38	0.376	0.083	0.083	0.084	0.084	0.446	0.422	0.315	0.124	0.1	0.086	0.397	0.411	0.082	0.083	0.083	0.084	0.497	0.393	0.178	0.083	0.099	0.083	0.421	0.429	0.083	0.283	0.423	0.427
	1899-12-31 17:48:27	37.1	0.506	0.39	0.122	0.101	0.088	0.484	0.477	0.083	0.084	0.087	0.084	0.551	0.396	0.319	0.118	0.103	0.087	0.39	0.387	0.083	0.083	0.084	0.084	0.451	0.427	0.319	0.123	0.1	0.086	0.409	0.419	0.082	0.083	0.083	0.084	0.493	0.398	0.186	0.083	0.099	0.083	0.43	0.438	0.083	0.289	0.431	0.433
	1899-12-31 17:58:27	37	0.514	0.4	0.123	0.102	0.088	0.495	0.488	0.083	0.084	0.087	0.084	0.566	0.41	0.323	0.118	0.103	0.087	0.399	0.396	0.083	0.083	0.085	0.085	0.466	0.438	0.324	0.124	0.101	0.086	0.42	0.433	0.083	0.083	0.084	0.084	0.51	0.413	0.191	0.083	0.1	0.084	0.438	0.446	0.083	0.299	0.442	0.441
	1899-12-31 18:08:27	37	0.518	0.406	0.123	0.102	0.088	0.505	0.497	0.084	0.084	0.088	0.084	0.573	0.421	0.328	0.118	0.103	0.087	0.405	0.403	0.083	0.083	0.084	0.084	0.474	0.445	0.33	0.124	0.1	0.087	0.423	0.434	0.082	0.083	0.084	0.084	0.519	0.423	0.194	0.083	0.099	0.084	0.446	0.454	0.083	0.306	0.45	0.447
	1899-12-31 18:18:27	37	0.525	0.41	0.123	0.101	0.089	0.511	0.504	0.083	0.083	0.087	0.084	0.582	0.428	0.33	0.118	0.103	0.087	0.412	0.413	0.083	0.083	0.084	0.084	0.481	0.447	0.334	0.124	0.1	0.087	0.431	0.444	0.082	0.084	0.083	0.084	0.522	0.437	0.201	0.083	0.099	0.083	0.452	0.46	0.083	0.315	0.456	0.456
	1899-12-31 18:28:27	37	0.528	0.416	0.123	0.101	0.088	0.52	0.512	0.083	0.083	0.087	0.084	0.59	0.437	0.332	0.118	0.103	0.087	0.417	0.415	0.083	0.083	0.084	0.084	0.491	0.452	0.336	0.124	0.1	0.086	0.43	0.441	0.083	0.083	0.084	0.084	0.53	0.451	0.204	0.083	0.099	0.083	0.455	0.462	0.083	0.321	0.456	0.458
	1899-12-31 18:38:27	37.1	0.536	0.424	0.124	0.101	0.089	0.53	0.522	0.083	0.083	0.087	0.084	0.6	0.444	0.336	0.118	0.103	0.087	0.422	0.426	0.083	0.083	0.084	0.084	0.5	0.459	0.341	0.124	0.101	0.087	0.44	0.454	0.083	0.083	0.083	0.083	0.539	0.467	0.206	0.083	0.099	0.083	0.463	0.471	0.083	0.328	0.465	0.467
	1899-12-31 18:48:27	37	0.54	0.433	0.124	0.101	0.088	0.542	0.536	0.083	0.083	0.087	0.084	0.608	0.452	0.34	0.118	0.102	0.087	0.425	0.426	0.083	0.083	0.084	0.084	0.51	0.466	0.343	0.124	0.1	0.086	0.441	0.449	0.082	0.083	0.083	0.083	0.553	0.482	0.214	0.083	0.099	0.083	0.464	0.472	0.083	0.332	0.466	0.464
	1899-12-31 18:58:27	37	0.541	0.435	0.124	0.101	0.088	0.547	0.54	0.083	0.083	0.087	0.084	0.616	0.457	0.348	0.117	0.103	0.087	0.436	0.434	0.083	0.083	0.084	0.084	0.519	0.469	0.348	0.124	0.101	0.087	0.447	0.459	0.082	0.083	0.083	0.084	0.557	0.491	0.212	0.083	0.099	0.084	0.469	0.476	0.083	0.345	0.478	0.477
	1899-12-31 19:08:27	37	0.543	0.436	0.125	0.102	0.089	0.554	0.547	0.083	0.083	0.088	0.084	0.62	0.46	0.355	0.118	0.103	0.087	0.436	0.438	0.083	0.083	0.085	0.084	0.526	0.471	0.351	0.123	0.101	0.087	0.449	0.459	0.083	0.083	0.084	0.084	0.557	0.499	0.215	0.083	0.099	0.083	0.473	0.48	0.084	0.349	0.479	0.48
	1899-12-31 19:18:27	37	0.548	0.44	0.125	0.101	0.089	0.56	0.551	0.084	0.083	0.087	0.084	0.629	0.466	0.362	0.118	0.103	0.087	0.444	0.443	0.083	0.084	0.085	0.085	0.535	0.475	0.357	0.124	0.101	0.087	0.451	0.465	0.082	0.083	0.084	0.084	0.567	0.507	0.216	0.083	0.1	0.083	0.48	0.486	0.084	0.361	0.488	0.484
	1899-12-31 19:28:27	37	0.552	0.444	0.126	0.101	0.088	0.566	0.559	0.083	0.084	0.087	0.084	0.635	0.472	0.363	0.117	0.103	0.087	0.45	0.448	0.084	0.083	0.084	0.084	0.542	0.48	0.359	0.124	0.101	0.086	0.454	0.464	0.083	0.083	0.085	0.084	0.573	0.515	0.22	0.083	0.1	0.083	0.481	0.487	0.083	0.364	0.49	0.486
	1899-12-31 19:38:27	37.1	0.554	0.445	0.126	0.101	0.089	0.57	0.563	0.083	0.083	0.087	0.084	0.638	0.472	0.364	0.117	0.103	0.087	0.457	0.456	0.083	0.083	0.084	0.084	0.545	0.48	0.358	0.123	0.1	0.087	0.46	0.471	0.083	0.083	0.084	0.084	0.573	0.518	0.227	0.083	0.099	0.083	0.487	0.492	0.083	0.379	0.498	0.495
	1899-12-31 19:48:27	37	0.561	0.452	0.128	0.101	0.089	0.583	0.579	0.083	0.083	0.087	0.084	0.651	0.483	0.364	0.117	0.103	0.087	0.459	0.456	0.083	0.083	0.084	0.084	0.559	0.49	0.355	0.124	0.1	0.087	0.463	0.47	0.082	0.083	0.083	0.084	0.587	0.53	0.228	0.082	0.099	0.083	0.487	0.494	0.083	0.381	0.497	0.495
	1899-12-31 19:58:27	37.1	0.559	0.45	0.128	0.101	0.088	0.581	0.576	0.083	0.083	0.087	0.084	0.651	0.478	0.364	0.117	0.103	0.087	0.463	0.462	0.084	0.083	0.084	0.084	0.562	0.488	0.355	0.124	0.1	0.087	0.469	0.478	0.082	0.083	0.083	0.084	0.586	0.528	0.239	0.083	0.099	0.083	0.491	0.498	0.083	0.392	0.508	0.502
	1899-12-31 20:08:27	37	0.565	0.454	0.13	0.101	0.089	0.59	0.584	0.084	0.084	0.087	0.084	0.657	0.484	0.365	0.117	0.103	0.087	0.466	0.464	0.083	0.083	0.084	0.085	0.57	0.494	0.354	0.123	0.1	0.087	0.469	0.478	0.083	0.083	0.084	0.084	0.593	0.536	0.24	0.083	0.1	0.083	0.493	0.5	0.084	0.393	0.502	0.501
	1899-12-31 20:18:27	37	0.57	0.459	0.131	0.102	0.089	0.596	0.593	0.083	0.084	0.087	0.084	0.664	0.489	0.365	0.116	0.103	0.087	0.472	0.47	0.084	0.083	0.084	0.085	0.577	0.499	0.356	0.124	0.101	0.087	0.478	0.487	0.083	0.083	0.084	0.084	0.6	0.542	0.251	0.083	0.099	0.083	0.496	0.504	0.084	0.409	0.513	0.507
	1899-12-31 20:28:27	37	0.573	0.46	0.132	0.101	0.089	0.602	0.598	0.083	0.083	0.087	0.084	0.668	0.491	0.367	0.117	0.102	0.087	0.476	0.475	0.083	0.083	0.084	0.084	0.582	0.501	0.356	0.124	0.101	0.087	0.486	0.496	0.082	0.083	0.084	0.084	0.606	0.547	0.258	0.083	0.099	0.083	0.495	0.503	0.084	0.417	0.512	0.51
	1899-12-31 20:38:27	37.1	0.577	0.463	0.134	0.101	0.089	0.61	0.605	0.083	0.083	0.087	0.084	0.673	0.499	0.368	0.116	0.103	0.087	0.477	0.478	0.083	0.083	0.084	0.084	0.591	0.505	0.355	0.124	0.1	0.087	0.485	0.492	0.082	0.083	0.084	0.084	0.617	0.553	0.261	0.083	0.099	0.083	0.5	0.506	0.084	0.418	0.516	0.512
	1899-12-31 20:48:27	37.1	0.581	0.462	0.135	0.101	0.089	0.614	0.609	0.083	0.083	0.087	0.084	0.674	0.5	0.371	0.116	0.102	0.087	0.485	0.483	0.083	0.083	0.084	0.084	0.594	0.508	0.357	0.124	0.1	0.087	0.491	0.503	0.082	0.083	0.083	0.084	0.62	0.555	0.263	0.083	0.099	0.083	0.503	0.507	0.083	0.431	0.524	0.515
	1899-12-31 20:58:27	37.1	0.585	0.465	0.136	0.101	0.088	0.621	0.616	0.083	0.083	0.087	0.083	0.68	0.507	0.372	0.116	0.102	0.087	0.481	0.485	0.083	0.083	0.084	0.084	0.602	0.515	0.357	0.124	0.1	0.087	0.49	0.499	0.082	0.083	0.084	0.083	0.629	0.563	0.261	0.083	0.099	0.083	0.503	0.508	0.084	0.427	0.52	0.517
	1899-12-31 21:08:27	37	0.589	0.465	0.138	0.101	0.089	0.627	0.625	0.083	0.083	0.087	0.084	0.684	0.506	0.377	0.116	0.102	0.088	0.486	0.49	0.083	0.083	0.084	0.084	0.603	0.515	0.361	0.124	0.1	0.087	0.5	0.51	0.083	0.083	0.084	0.084	0.629	0.564	0.267	0.083	0.1	0.083	0.503	0.51	0.084	0.447	0.522	0.518
	1899-12-31 21:18:27	37	0.591	0.465	0.141	0.102	0.089	0.632	0.627	0.083	0.084	0.087	0.084	0.69	0.511	0.375	0.116	0.103	0.088	0.488	0.492	0.084	0.083	0.084	0.085	0.612	0.521	0.362	0.125	0.101	0.087	0.501	0.506	0.083	0.083	0.084	0.084	0.634	0.57	0.264	0.083	0.1	0.083	0.507	0.512	0.084	0.444	0.523	0.519
	1899-12-31 21:28:27	37	0.596	0.468	0.144	0.102	0.089	0.638	0.632	0.083	0.084	0.087	0.084	0.695	0.516	0.379	0.116	0.102	0.087	0.489	0.495	0.083	0.083	0.084	0.085	0.619	0.528	0.364	0.125	0.101	0.087	0.502	0.51	0.082	0.083	0.084	0.084	0.639	0.576	0.27	0.083	0.099	0.083	0.507	0.511	0.084	0.447	0.524	0.522
	1899-12-31 21:38:27	37	0.597	0.468	0.145	0.101	0.089	0.643	0.637	0.083	0.083	0.087	0.084	0.698	0.519	0.379	0.116	0.102	0.087	0.492	0.498	0.084	0.083	0.084	0.084	0.622	0.53	0.365	0.124	0.1	0.087	0.501	0.51	0.082	0.083	0.084	0.084	0.647	0.579	0.264	0.083	0.099	0.084	0.506	0.509	0.084	0.453	0.526	0.524
	1899-12-31 21:48:27	37.1	0.599	0.466	0.144	0.101	0.089	0.646	0.641	0.083	0.083	0.087	0.084	0.698	0.521	0.381	0.116	0.102	0.087	0.495	0.502	0.083	0.083	0.084	0.084	0.623	0.53	0.367	0.125	0.1	0.087	0.506	0.515	0.082	0.083	0.084	0.084	0.651	0.581	0.27	0.083	0.099	0.083	0.506	0.511	0.084	0.46	0.528	0.522
	1899-12-31 21:58:27	37.1	0.604	0.469	0.146	0.101	0.089	0.655	0.651	0.083	0.083	0.087	0.084	0.704	0.529	0.38	0.115	0.102	0.087	0.497	0.5	0.083	0.083	0.084	0.084	0.633	0.539	0.366	0.124	0.1	0.087	0.505	0.51	0.082	0.083	0.083	0.084	0.659	0.587	0.265	0.083	0.099	0.083	0.502	0.505	0.083	0.455	0.519	0.524
	1899-12-31 22:08:27	37	0.607	0.468	0.148	0.101	0.089	0.658	0.653	0.083	0.083	0.087	0.084	0.708	0.531	0.383	0.115	0.102	0.087	0.504	0.504	0.083	0.083	0.084	0.084	0.636	0.541	0.368	0.123	0.1	0.087	0.507	0.515	0.083	0.083	0.083	0.084	0.666	0.598	0.268	0.083	0.099	0.083	0.505	0.51	0.084	0.46	0.522	0.524
	1899-12-31 22:18:27	37	0.612	0.469	0.151	0.102	0.089	0.663	0.659	0.084	0.084	0.087	0.084	0.714	0.535	0.385	0.115	0.102	0.087	0.507	0.511	0.084	0.083	0.085	0.085	0.641	0.546	0.371	0.124	0.1	0.088	0.511	0.518	0.083	0.083	0.084	0.084	0.668	0.548	0.272	0.084	0.099	0.084	0.508	0.512	0.084	0.466	0.524	0.525
	1899-12-31 22:28:27	37	0.617	0.47	0.152	0.101	0.09	0.666	0.662	0.084	0.083	0.088	0.084	0.721	0.536	0.387	0.115	0.102	0.088	0.512	0.517	0.084	0.083	0.084	0.085	0.644	0.547	0.374	0.124	0.101	0.087	0.518	0.523	0.082	0.083	0.084	0.084	0.673	0.538	0.283	0.083	0.1	0.084	0.51	0.516	0.084	0.473	0.526	0.527
	1899-12-31 22:38:27	37	0.621	0.47	0.152	0.102	0.089	0.67	0.666	0.084	0.083	0.087	0.084	0.725	0.54	0.388	0.115	0.103	0.087	0.517	0.524	0.084	0.083	0.084	0.085	0.649	0.551	0.375	0.125	0.101	0.087	0.519	0.526	0.082	0.083	0.084	0.084	0.68	0.538	0.285	0.083	0.1	0.083	0.508	0.515	0.084	0.475	0.526	0.532
	1899-12-31 22:48:27	37.1	0.625	0.469	0.153	0.102	0.089	0.675	0.668	0.084	0.083	0.087	0.084	0.729	0.542	0.39	0.115	0.102	0.087	0.522	0.528	0.084	0.083	0.084	0.084	0.651	0.553	0.377	0.125	0.1	0.088	0.521	0.528	0.082	0.083	0.083	0.084	0.686	0.539	0.287	0.083	0.099	0.084	0.51	0.518	0.084	0.478	0.527	0.533
	1899-12-31 22:58:27	37.1	0.627	0.469	0.156	0.102	0.089	0.677	0.674	0.083	0.083	0.087	0.084	0.731	0.545	0.387	0.115	0.102	0.087	0.525	0.525	0.083	0.083	0.084	0.085	0.658	0.557	0.376	0.125	0.1	0.087	0.517	0.524	0.082	0.083	0.084	0.084	0.69	0.539	0.285	0.083	0.099	0.083	0.509	0.516	0.084	0.473	0.527	0.53
	1899-12-31 23:08:27	37.1	0.63	0.473	0.159	0.102	0.09	0.685	0.682	0.083	0.083	0.087	0.084	0.739	0.549	0.385	0.114	0.102	0.087	0.527	0.529	0.083	0.083	0.084	0.085	0.662	0.56	0.376	0.124	0.1	0.088	0.517	0.522	0.082	0.083	0.084	0.084	0.694	0.539	0.288	0.083	0.099	0.083	0.51	0.516	0.084	0.472	0.527	0.529
	1899-12-31 23:18:27	37	0.633	0.47	0.16	0.102	0.089	0.686	0.682	0.084	0.084	0.087	0.084	0.742	0.549	0.387	0.115	0.102	0.087	0.533	0.533	0.084	0.083	0.084	0.085	0.662	0.56	0.378	0.125	0.101	0.088	0.52	0.524	0.083	0.083	0.084	0.084	0.698	0.541	0.291	0.083	0.099	0.084	0.511	0.518	0.085	0.475	0.529	0.532
	1899-12-31
	1899-12-31
	1899-12-31
	1899-12-31
	1899-12-31
	1899-12-31
	1899-12-31
	1899-12-31
	1899-12-31
	1899-12-31
	1899-12-31
	1899-12-31
	1899-12-31
	1899-12-31
	1899-12-31
	1899-12-31
	1899-12-31
	1899-12-31
	1899-12-31
	1899-12-31
	1899-12-31
	1899-12-31
	1899-12-31
	1899-12-31
	1899-12-31
	1899-12-31
	1899-12-31
	1899-12-31
	1899-12-31
	1899-12-31
	1899-12-31
	1899-12-31
	1899-12-31
	1899-12-31
	1899-12-31
	1899-12-31
	1899-12-31
	1899-12-31
	1899-12-31
	1899-12-31
	1899-12-31
	1899-12-31
	1899-12-31
	1899-12-31
	1899-12-31
	1899-12-31
	1899-12-31
	1899-12-31
	1899-12-31
	1899-12-31
	1899-12-31
	1899-12-31
	1899-12-31
	1899-12-31
	1899-12-31
	1899-12-31
	1899-12-31
	1899-12-31
	1899-12-31
	1899-12-31
	1899-12-31
	1899-12-31
	1899-12-31
	1899-12-31
	1899-12-31
	1899-12-31
	1899-12-31
	1899-12-31
	1899-12-31
	1899-12-31
	1899-12-31
	1899-12-31
	1899-12-31
	1899-12-31
	1899-12-31
	1899-12-31
	1899-12-31
	1899-12-31
	1899-12-31
	1899-12-31
	1899-12-31
	1899-12-31
	1899-12-31
	1899-12-31
	1899-12-31
	1899-12-31
	1899-12-31
	1899-12-31
	1899-12-31
	1899-12-31
	1899-12-31
	1899-12-31
	1899-12-31
	1899-12-31
	1899-12-31
	1899-12-31
	1899-12-31
	1899-12-31
	1899-12-31
	1899-12-31
	1899-12-31
	1899-12-31
	1899-12-31
	1899-12-31
	1899-12-31
	1899-12-31
	1899-12-31
	1899-12-31
	1899-12-31
	1899-12-31
	1899-12-31
	1899-12-31
	1899-12-31
	1899-12-31
	1899-12-31
	1899-12-31
	1899-12-31
	1899-12-31
	1899-12-31
	1899-12-31
	1899-12-31
	1899-12-31
	1899-12-31
	1899-12-31
	1899-12-31
	1899-12-31
	1899-12-31
	1899-12-31
	1899-12-31
	1899-12-31
	1899-12-31
	1899-12-31
	1899-12-31
	1899-12-31
	1899-12-31
	1899-12-31
	1899-12-31
	1899-12-31
	1899-12-31
	1899-12-31
	1899-12-31
	1899-12-31
	1899-12-31
	1899-12-31
	1899-12-31
	1899-12-31
	1899-12-31
	1899-12-31
	1899-12-31
	1899-12-31
	1899-12-31
	1899-12-31
	1899-12-31
	1899-12-31
	1899-12-31
	1899-12-31
	1899-12-31
	1899-12-31
	1899-12-31
	1899-12-31
	1899-12-31
	1899-12-31
	1899-12-31
	1899-12-31
	1899-12-31
	1899-12-31
	1899-12-31
	1899-12-31
	1899-12-31
	1899-12-31
	1899-12-31
	1899-12-31
	1899-12-31
	1899-12-31
	1899-12-31
	1899-12-31
	1899-12-31
	1899-12-31
	1899-12-31
	1899-12-31
	1899-12-31
	1899-12-31
	1899-12-31
	1899-12-31
	1899-12-31
	1899-12-31
	1899-12-31
	1899-12-31
	1899-12-31
	1899-12-31
	1899-12-31
	1899-12-31
	1899-12-31
	1899-12-31
	1899-12-31
	1899-12-31
	1899-12-31
	1899-12-31
	1899-12-31
	1899-12-31
	1899-12-31
	1899-12-31
	1899-12-31
	1899-12-31
	1899-12-31
	1899-12-31
	1899-12-31
	1899-12-31
	1899-12-31
	1899-12-31
	1899-12-31
	1899-12-31
	1899-12-31
	1899-12-31
	1899-12-31
	1899-12-31
	1899-12-31
	1899-12-31
	1899-12-31
	1899-12-31
	1899-12-31
	1899-12-31
	1899-12-31
	1899-12-31
	1899-12-31
	1899-12-31
	1899-12-31
	1899-12-31
	1899-12-31
	1899-12-31
	1899-12-31
	1899-12-31
	1899-12-31
	1899-12-31
	1899-12-31
	1899-12-31
	1899-12-31
	1899-12-31
	1899-12-31
	1899-12-31
	1899-12-31
	1899-12-31
	1899-12-31
	1899-12-31
	1899-12-31
	1899-12-31
	1899-12-31
	1899-12-31
	1899-12-31
	1899-12-31
	1899-12-31
	1899-12-31
	1899-12-31
	1899-12-31
	1899-12-31
	1899-12-31
	1899-12-31
	1899-12-31
	1899-12-31
	1899-12-31
	1899-12-31
	1899-12-31
	1899-12-31
	1899-12-31
	1899-12-31
	1899-12-31
	1899-12-31
	1899-12-31
	1899-12-31
	1899-12-31
	1899-12-31
	1899-12-31
	1899-12-31
	1899-12-31
	1899-12-31
	1899-12-31
	1899-12-31
	1899-12-31
	1899-12-31
	1899-12-31
	1899-12-31
	1899-12-31
	1899-12-31
	1899-12-31
	1899-12-31
	1899-12-31
	1899-12-31
	1899-12-31
	1899-12-31
	1899-12-31
	1899-12-31
	1899-12-31
	1899-12-31
	1899-12-31
	1899-12-31
	1899-12-31
	1899-12-31
	1899-12-31
	1899-12-31
	1899-12-31
	1899-12-31
	1899-12-31
	1899-12-31
	1899-12-31
	1899-12-31
	1899-12-31
	1899-12-31
	1899-12-31
	1899-12-31
	1899-12-31
	1899-12-31
	1899-12-31
	1899-12-31
	1899-12-31
	1899-12-31
	1899-12-31
	1899-12-31
	1899-12-31
	1899-12-31
	1899-12-31
	1899-12-31
	1899-12-31
	1899-12-31
	1899-12-31
	1899-12-31
	1899-12-31
	1899-12-31
	1899-12-31
	1899-12-31
	1899-12-31
	1899-12-31
	1899-12-31
	1899-12-31
	1899-12-31
	1899-12-31
	1899-12-31
	1899-12-31
	1899-12-31
	1899-12-31
	1899-12-31
	1899-12-31
	1899-12-31
	1899-12-31
	1899-12-31
	1899-12-31
	1899-12-31
	1899-12-31
	1899-12-31
	1899-12-31
	1899-12-31
	1899-12-31
	1899-12-31
	1899-12-31
	1899-12-31
	1899-12-31
	1899-12-31
	1899-12-31
	1899-12-31
	1899-12-31
	1899-12-31
	1899-12-31
	1899-12-31
	1899-12-31
	1899-12-31
	1899-12-31
	1899-12-31
	1899-12-31
	1899-12-31
	1899-12-31
	1899-12-31
	1899-12-31
	1899-12-31
	1899-12-31
	1899-12-31
	1899-12-31
	1899-12-31
	1899-12-31
	1899-12-31
	1899-12-31
	1899-12-31
	1899-12-31
	1899-12-31
	1899-12-31
	1899-12-31
	1899-12-31
	1899-12-31
	1899-12-31
	1899-12-31
	1899-12-31
	1899-12-31
	1899-12-31
	1899-12-31
	1899-12-31
	1899-12-31
	1899-12-31
	1899-12-31
	1899-12-31
	1899-12-31
	1899-12-31
	1899-12-31
	1899-12-31
	1899-12-31
	1899-12-31
	1899-12-31
	1899-12-31
	1899-12-31
	1899-12-31
	1899-12-31
	1899-12-31
	1899-12-31
	1899-12-31
	1899-12-31
	1899-12-31
	1899-12-31
	1899-12-31
	1899-12-31
	1899-12-31
	1899-12-31
	1899-12-31
	1899-12-31
	1899-12-31
	1899-12-31
	1899-12-31
	1899-12-31
	1899-12-31
	1899-12-31
	1899-12-31
	1899-12-31
	1899-12-31
	1899-12-31
	1899-12-31
	1899-12-31
	1899-12-31
	1899-12-31
	1899-12-31
	1899-12-31
	1899-12-31
	1899-12-31
	1899-12-31
	1899-12-31
	1899-12-31
	1899-12-31
	1899-12-31
	1899-12-31
	1899-12-31
	1899-12-31
	1899-12-31
	1899-12-31
	1899-12-31
	1899-12-31
	1899-12-31
	1899-12-31
	1899-12-31
	1899-12-31
	1899-12-31
	1899-12-31
	1899-12-31
	1899-12-31
	1899-12-31
	1899-12-31
	1899-12-31
	1899-12-31
	1899-12-31
	1899-12-31
	1899-12-31
	1899-12-31
	1899-12-31
	1899-12-31
	1899-12-31
	1899-12-31
	1899-12-31
	1899-12-31
	1899-12-31
	1899-12-31
	1899-12-31
	1899-12-31
	1899-12-31
	1899-12-31
	1899-12-31
	1899-12-31
	1899-12-31
	1899-12-31
	1899-12-31
	1899-12-31
	1899-12-31
	1899-12-31
	1899-12-31
	1899-12-31
	1899-12-31
	1899-12-31
	1899-12-31
	1899-12-31
	1899-12-31
	1899-12-31
	1899-12-31
	1899-12-31
	1899-12-31
	1899-12-31
	1899-12-31
	1899-12-31
	1899-12-31
	1899-12-31
	1899-12-31
	1899-12-31
	1899-12-31
	1899-12-31
	1899-12-31
	1899-12-31
	1899-12-31
	1899-12-31
	1899-12-31
	1899-12-31
	1899-12-31
	1899-12-31
	1899-12-31
	1899-12-31
	1899-12-31
	1899-12-31
	1899-12-31
	1899-12-31
	1899-12-31
	1899-12-31
	1899-12-31
	1899-12-31
	1899-12-31
	1899-12-31
	1899-12-31
	1899-12-31
	1899-12-31
	1899-12-31
	1899-12-31
	1899-12-31
	1899-12-31
	1899-12-31
	1899-12-31
	1899-12-31
	1899-12-31
	1899-12-31
	1899-12-31
	1899-12-31
	1899-12-31
	1899-12-31
	1899-12-31
	1899-12-31
	1899-12-31
	1899-12-31
	1899-12-31
	1899-12-31
	1899-12-31
	1899-12-31
	1899-12-31
	1899-12-31
	1899-12-31
	1899-12-31
	1899-12-31
	1899-12-31
	1899-12-31
	1899-12-31
	1899-12-31
	1899-12-31
	1899-12-31
	1899-12-31
	1899-12-31
	1899-12-31
	1899-12-31
	1899-12-31
	1899-12-31
	1899-12-31
	1899-12-31
	1899-12-31
	1899-12-31
	1899-12-31
	1899-12-31
	1899-12-31
	1899-12-31
	1899-12-31
	1899-12-31
	1899-12-31
	1899-12-31
	1899-12-31
	1899-12-31
	1899-12-31
	1899-12-31
	1899-12-31
	1899-12-31
	1899-12-31
	1899-12-31
	1899-12-31
	1899-12-31
	1899-12-31
	1899-12-31
	1899-12-31
	1899-12-31
	1899-12-31
	1899-12-31
	1899-12-31
	1899-12-31
	1899-12-31
	1899-12-31
	1899-12-31
	1899-12-31
	1899-12-31
	1899-12-31
	1899-12-31
	1899-12-31
	1899-12-31
	1899-12-31
	1899-12-31
	1899-12-31
	1899-12-31
	1899-12-31
	1899-12-31
	1899-12-31
	1899-12-31
	1899-12-31
	1899-12-31
	1899-12-31
	1899-12-31
	1899-12-31
	1899-12-31
	1899-12-31
	1899-12-31
	1899-12-31
	1899-12-31
	1899-12-31
	1899-12-31
	1899-12-31
	1899-12-31
	1899-12-31
	1899-12-31
	1899-12-31
	1899-12-31
	1899-12-31
	1899-12-31
	1899-12-31
	1899-12-31
	1899-12-31
	1899-12-31
	1899-12-31
	1899-12-31
	1899-12-31
	1899-12-31
	1899-12-31
	1899-12-31
	1899-12-31
	1899-12-31
	1899-12-31
	1899-12-31
	1899-12-31
	1899-12-31
	1899-12-31
	1899-12-31
	1899-12-31
	1899-12-31
	1899-12-31
	1899-12-31
	1899-12-31
	1899-12-31
	1899-12-31
	1899-12-31
	1899-12-31
	1899-12-31
	1899-12-31
	1899-12-31
	1899-12-31
	1899-12-31
	1899-12-31
	1899-12-31
	1899-12-31
	1899-12-31
	1899-12-31
	1899-12-31
	1899-12-31
	1899-12-31
	1899-12-31
	1899-12-31
	1899-12-31
	1899-12-31
	1899-12-31
	1899-12-31
	1899-12-31
	1899-12-31
	1899-12-31
	1899-12-31
	1899-12-31
	1899-12-31
	1899-12-31
	1899-12-31
	1899-12-31
	1899-12-31
	1899-12-31
	1899-12-31
	1899-12-31
	1899-12-31
	1899-12-31
	1899-12-31
	1899-12-31
	1899-12-31
	1899-12-31
	1899-12-31
	1899-12-31
	1899-12-31
	1899-12-31
	1899-12-31
	1899-12-31
	1899-12-31
	1899-12-31
	1899-12-31
	1899-12-31
	1899-12-31
	1899-12-31
	1899-12-31
	1899-12-31
	1899-12-31
	1899-12-31
	1899-12-31
	1899-12-31
	1899-12-31
	1899-12-31
	1899-12-31
	1899-12-31
	1899-12-31
	1899-12-31
	1899-12-31
	1899-12-31
	1899-12-31
	1899-12-31
Read 2:515,545
	Time	T° Read 2:515,545	A1	A2	A3	A4	A5	A6	A7	A8	A9	A10	A11	A12	B1	B2	B3	B4	B5	B6	B7	B8	B9	B10	B11	B12	C1	C2	C3	C4	C5	C6	C7	C8	C9	C10	C11	C12	D1	D2	D3	D4	D5	D6	D7	D8	D9	D10	D11
	1899-12-31 00:08:38	37	156	152	176	160	170	145	131	176	152	155	149	150	168	154	148	147	164	153	162	182	140	146	141	139	158	140	154	169	175	149	169	166	159	138	158	160	163	157	153	152	140	154	141	164	145	148	143
	1899-12-31 00:18:38	37	142	143	147	156	149	160	150	178	166	175	144	162	169	155	155	153	153	163	162	168	119	165	153	157	160	164	164	159	162	151	159	159	161	166	152	168	155	144	148	161	150	139	164	164	153	170	137
	1899-12-31 00:28:38	37	153	157	146	145	159	162	142	173	166	145	148	128	153	144	145	144	151	196	164	183	137	158	155	155	145	146	146	167	155	163	162	164	176	143	153	142	168	147	164	139	143	142	154	177	158	145	163
	1899-12-31 00:38:38	37	158	166	147	147	183	171	152	189	143	167	155	155	150	162	170	155	134	170	162	181	137	161	139	149	159	164	156	154	144	175	173	164	157	150	136	141	149	148	155	161	145	161	136	166	147	144	138
	1899-12-31 00:48:38	37.1	152	152	149	161	158	144	143	156	154	162	146	143	138	157	158	145	143	147	156	171	167	150	156	154	152	158	158	155	136	159	159	177	166	147	162	137	166	150	161	145	162	146	147	154	154	134	145
	1899-12-31 00:58:38	37.1	152	150	144	149	162	147	144	176	152	143	169	150	155	167	169	147	146	150	155	164	153	159	134	140	152	147	142	170	140	175	149	161	155	151	148	147	144	165	177	169	151	174	151	172	156	166	147
	1899-12-31 01:08:38	37	154	153	153	126	146	139	144	169	165	145	145	152	162	165	155	141	143	154	184	191	138	144	153	155	146	164	173	145	147	139	152	183	150	154	153	150	122	159	144	153	162	151	148	179	164	169	146
	1899-12-31 01:18:38	37	141	164	147	141	141	155	152	152	164	146	154	163	161	161	155	155	136	144	162	154	144	161	134	138	174	177	159	156	172	148	181	174	158	143	143	144	140	144	139	163	148	167	152	177	138	129	144
	1899-12-31 01:28:38	37	145	163	136	143	146	141	145	165	143	144	140	146	162	176	159	152	148	157	139	151	133	153	164	147	163	163	164	165	143	155	138	185	154	135	145	145	160	143	169	153	161	167	149	158	154	143	154
	1899-12-31 01:38:38	37	148	141	136	146	151	144	151	168	150	155	147	155	179	140	150	159	151	182	164	189	167	146	136	150	167	158	156	149	148	164	170	182	139	149	144	148	164	164	163	155	149	158	133	152	167	162	157
	1899-12-31 01:48:38	37.1	167	158	145	155	138	148	156	159	151	153	144	172	172	157	163	162	140	166	182	152	149	154	146	123	158	152	152	173	154	148	149	168	176	162	146	146	151	148	172	159	142	146	162	171	157	136	132
	1899-12-31 01:58:38	37.1	155	158	147	160	154	138	148	162	152	142	160	145	146	151	179	144	155	174	154	176	139	152	155	153	153	146	146	143	140	168	163	187	151	142	155	152	146	163	146	140	157	159	144	164	151	149	165
	1899-12-31 02:08:38	37	145	156	154	144	148	158	158	166	136	161	128	148	168	157	158	129	153	160	136	152	137	138	143	138	143	148	168	164	158	156	154	176	149	159	147	146	158	148	177	154	152	171	142	172	151	154	157
	1899-12-31 02:18:38	37	151	160	151	165	136	148	145	172	143	134	147	150	161	164	141	153	133	160	151	172	145	161	147	137	158	154	144	158	158	161	152	170	148	158	142	152	153	160	144	143	136	155	152	177	144	152	145
	1899-12-31 02:28:38	37	155	163	119	154	149	143	161	175	145	133	154	168	146	163	149	159	149	158	144	155	157	157	136	158	160	167	146	157	153	152	172	163	142	145	139	139	164	154	170	160	152	135	157	161	153	157	160
	1899-12-31 02:38:38	37	158	162	149	146	157	155	151	161	153	138	163	150	156	146	154	137	163	170	155	158	163	141	148	162	158	148	142	141	143	165	160	162	159	161	151	142	158	149	159	156	153	137	151	173	152	156	143
	1899-12-31 02:48:38	37	154	136	149	145	143	140	165	160	157	148	146	156	156	142	154	154	148	168	140	165	142	159	155	152	156	162	150	149	142	153	163	149	139	157	132	146	159	165	157	151	159	143	137	147	149	153	143
	1899-12-31 02:58:38	37.1	158	153	161	156	150	145	156	194	164	169	159	172	135	135	161	168	142	140	132	152	157	145	147	153	151	151	175	158	156	151	143	151	153	145	149	152	148	143	153	147	170	154	170	169	153	151	139
	1899-12-31 03:08:38	37	148	136	152	142	158	143	142	159	165	156	155	149	162	148	140	143	156	144	150	176	136	160	134	152	142	142	132	148	149	164	177	160	162	177	145	140	144	149	149	143	151	147	131	173	162	152	139
	1899-12-31 03:18:38	37	152	149	160	137	156	140	149	143	171	160	124	151	166	158	144	164	139	156	158	152	167	156	156	145	154	165	144	142	149	170	152	174	159	153	156	147	169	166	170	157	144	144	152	175	132	145	136
	1899-12-31 03:28:38	37	150	159	151	154	157	151	138	174	158	155	151	135	153	152	153	144	170	153	149	168	172	164	155	140	159	144	155	148	149	162	181	183	154	157	151	151	159	136	160	150	154	163	129	169	151	146	146
	1899-12-31 03:38:38	37.1	160	155	159	172	171	159	157	150	157	142	154	143	151	144	155	137	155	167	157	165	133	150	152	151	149	157	158	144	150	147	159	169	153	149	141	175	164	168	142	151	157	157	157	156	158	131	163
	1899-12-31 03:48:38	37.1	155	148	149	134	156	140	154	141	141	145	162	138	154	158	162	149	130	169	161	152	148	134	154	125	165	151	161	164	160	166	147	155	164	147	147	170	155	155	170	131	145	151	138	180	143	160	158
	1899-12-31 03:58:38	37.1	139	157	148	135	146	139	152	165	156	141	140	170	138	155	151	146	131	149	161	156	157	144	155	152	151	153	160	166	140	160	151	163	147	142	173	168	166	150	151	166	143	150	142	171	146	147	149
	1899-12-31 04:08:38	37	157	165	137	149	136	157	139	160	171	143	131	159	149	156	149	156	140	169	155	171	160	140	145	145	147	157	162	155	150	168	163	162	143	133	148	156	143	173	163	144	159	193	151	161	155	146	147
	1899-12-31 04:18:38	37	145	150	144	143	161	149	146	172	149	159	134	150	170	163	143	147	145	181	152	162	161	133	164	146	151	135	156	148	141	149	160	161	145	167	157	132	151	158	163	147	142	148	158	196	154	165	152
	1899-12-31 04:28:38	37	139	155	137	147	143	152	140	135	161	155	143	165	124	143	134	139	160	155	156	166	144	159	131	147	145	160	160	172	152	157	160	163	139	147	139	155	162	162	172	150	161	174	146	169	161	158	158
	1899-12-31 04:38:38	37	150	166	160	159	151	157	151	160	151	142	152	160	180	171	155	145	166	163	167	158	156	138	170	149	161	148	166	168	135	179	152	169	157	158	143	144	150	166	152	160	167	165	154	171	156	156	157
	1899-12-31 04:48:38	37.1	155	142	156	155	145	156	135	163	151	154	133	160	136	148	155	154	141	173	154	159	142	142	137	145	147	145	145	152	175	159	177	184	150	131	159	139	163	152	161	146	186	160	155	164	168	165	171
	1899-12-31 04:58:38	37.1	158	155	134	150	147	149	157	153	144	138	141	159	170	163	167	145	159	163	149	151	146	136	149	148	155	145	141	166	169	161	165	169	145	156	139	150	140	172	169	146	141	172	147	180	145	155	157
	1899-12-31 05:08:38	37	157	173	140	160	136	160	158	156	165	151	150	154	138	147	161	140	148	154	159	172	133	141	165	138	148	129	157	169	155	165	158	172	152	163	139	133	161	150	141	166	148	164	153	158	157	150	159
	1899-12-31 05:18:38	37	147	142	144	147	145	138	168	159	146	149	126	137	144	134	156	148	163	169	161	175	148	145	137	144	157	152	148	158	152	169	154	157	157	156	155	167	136	145	152	154	155	151	153	148	172	150	144
	1899-12-31 05:28:38	37	163	142	138	141	152	143	159	148	133	139	143	157	155	154	164	154	150	174	155	186	169	148	173	161	142	149	149	170	154	156	154	173	171	152	145	175	145	167	164	158	151	145	147	165	151	157	155
	1899-12-31 05:38:38	37.1	148	135	146	142	159	156	142	167	152	157	132	142	154	156	157	169	169	138	190	182	160	139	164	152	147	149	159	163	160	176	155	158	178	157	137	156	150	168	149	148	165	157	166	146	164	157	159
	1899-12-31 05:48:38	37.1	144	142	143	133	156	147	149	177	148	155	166	161	173	141	147	184	151	144	151	170	155	170	152	157	147	168	137	147	159	166	157	177	149	166	149	139	167	172	161	132	147	154	170	160	166	162	165
	1899-12-31 05:58:38	37	143	152	157	147	139	167	141	162	156	151	144	161	147	158	153	140	161	167	165	174	142	151	165	153	137	151	158	154	161	154	164	152	158	160	151	165	162	174	133	146	142	162	167	162	163	153	161
	1899-12-31 06:08:38	37	147	136	145	146	150	151	151	139	133	133	157	153	160	139	148	159	154	156	151	174	148	152	146	166	150	172	141	138	148	168	161	178	151	148	148	162	175	150	160	152	167	156	163	160	168	159	166
	1899-12-31 06:18:38	37	155	148	127	149	156	176	157	168	161	160	115	150	163	163	142	146	151	162	174	148	144	155	153	160	146	155	134	164	141	143	178	173	175	155	143	167	168	149	147	152	146	167	166	181	171	160	170
	1899-12-31 06:28:38	37	173	154	156	139	169	139	162	151	148	133	145	174	180	168	147	162	154	167	151	178	159	168	162	148	166	155	158	151	164	163	162	170	146	148	162	160	169	164	162	163	153	167	175	173	163	165	161
	1899-12-31 06:38:38	37.1	166	152	153	146	163	153	162	151	179	151	161	162	150	152	156	151	153	156	177	159	154	149	162	157	150	159	144	165	154	171	176	172	136	136	143	173	163	156	155	152	141	157	165	171	180	165	167
	1899-12-31 06:48:38	37.1	154	153	135	158	156	139	150	150	148	151	142	168	173	155	144	153	156	162	170	161	165	128	163	146	166	154	165	158	152	173	168	169	150	146	145	165	171	138	148	143	156	173	178	180	152	154	169
	1899-12-31 06:58:38	37.1	151	167	141	147	149	165	169	166	159	138	127	177	161	157	145	156	153	156	175	166	147	136	149	173	154	153	147	149	148	170	185	161	160	156	152	173	174	148	165	153	141	169	166	147	171	168	170
	1899-12-31 07:08:38	37	159	172	169	140	144	153	159	164	144	130	141	156	157	161	179	146	139	167	170	153	162	139	131	154	158	156	141	176	165	185	181	169	147	135	144	195	148	150	143	167	140	169	166	162	152	161	172
	1899-12-31 07:18:38	37	142	153	140	144	153	176	162	168	155	140	139	150	150	173	141	172	166	170	175	151	151	137	136	166	161	159	167	182	151	199	160	181	151	145	164	169	181	149	153	157	156	166	169	174	173	162	156
	1899-12-31 07:28:38	37	157	167	158	165	145	160	173	175	157	148	150	182	156	166	164	157	173	188	168	154	148	152	140	156	165	138	154	169	145	171	174	162	152	152	174	165	161	159	144	138	160	174	154	168	171	168	174
	1899-12-31 07:38:38	37	169	174	149	138	167	161	141	154	133	140	136	168	162	161	138	153	146	190	192	157	145	160	149	160	148	163	158	163	158	160	187	159	144	158	158	160	161	145	175	149	155	189	185	155	159	172	168
	1899-12-31 07:48:38	37.1	153	176	154	131	159	172	183	151	159	131	164	171	158	153	165	147	147	205	160	173	140	162	149	160	166	151	168	177	163	186	180	143	151	159	135	154	158	169	163	171	168	169	163	157	149	172	181
	1899-12-31 07:58:38	37	158	157	157	157	151	184	174	154	144	149	126	178	169	163	147	156	165	159	165	163	143	163	162	157	159	167	165	151	152	181	178	164	159	151	157	173	169	156	159	170	141	183	186	144	170	169	184
	1899-12-31 08:08:38	37	165	149	132	153	157	150	170	178	155	137	144	157	167	162	148	138	158	184	172	146	152	141	157	165	153	172	141	157	153	172	189	167	146	153	147	166	164	166	166	168	151	190	175	181	171	169	183
	1899-12-31 08:18:38	37	156	141	139	160	167	182	163	153	137	133	163	160	168	184	159	150	159	187	170	168	144	135	142	168	144	166	148	157	182	180	188	181	154	145	141	167	172	146	164	125	150	178	176	170	169	187	161
	1899-12-31 08:28:38	37	164	182	144	154	154	166	169	159	158	150	154	177	161	181	169	143	153	180	189	158	155	153	144	162	159	166	165	154	143	179	191	158	171	161	146	180	156	157	154	142	159	200	175	155	164	181	173
	1899-12-31 08:38:38	37	172	160	157	168	172	162	173	137	140	164	147	196	189	173	152	166	160	190	192	152	147	156	172	175	164	175	159	161	160	198	173	149	142	163	143	183	166	170	157	145	156	189	177	188	161	181	173
	1899-12-31 08:48:38	37.1	156	160	144	164	150	183	172	151	161	154	149	176	167	168	169	141	172	197	190	161	140	137	154	168	178	187	184	164	128	192	185	164	165	178	145	183	184	161	169	152	153	206	182	165	176	177	178
	1899-12-31 08:58:38	37.1	166	174	164	156	169	177	179	171	140	148	146	182	175	170	140	158	169	184	209	178	156	143	178	171	179	194	161	150	162	183	192	182	181	156	152	198	182	166	154	139	157	195	170	192	175	188	168
	1899-12-31 09:08:38	37	169	164	150	145	144	201	180	150	152	138	135	171	154	170	155	163	155	216	179	157	158	146	143	168	157	179	162	170	167	206	190	175	140	148	154	172	188	169	161	174	147	188	194	175	189	192	167
	1899-12-31 09:18:38	37	162	187	144	164	145	191	186	146	146	146	152	194	181	180	169	163	171	201	202	164	135	132	151	184	180	179	161	153	174	198	184	161	154	161	151	205	197	159	163	171	141	182	198	161	190	197	178
	1899-12-31 09:28:38	37	168	177	153	128	158	186	186	146	138	144	145	174	174	186	177	183	138	178	195	157	144	133	149	182	165	179	166	177	150	189	197	191	154	168	144	187	184	163	161	143	146	190	208	188	189	198	194
	1899-12-31 09:38:38	37	146	174	140	162	172	195	187	162	148	143	149	212	190	199	175	156	159	201	188	155	154	151	159	195	162	188	154	189	145	195	220	167	153	157	152	232	180	142	139	151	159	206	217	144	171	191	214
	1899-12-31 09:48:38	37.1	180	177	170	145	159	197	191	162	163	142	137	198	217	185	175	159	155	214	219	145	153	161	149	208	191	205	163	169	146	193	210	174	140	157	151	191	195	156	163	164	150	210	212	171	177	190	191
	1899-12-31 09:58:38	37.1	190	179	158	161	153	192	183	163	162	147	140	203	193	171	163	157	149	231	200	169	155	143	144	209	174	207	172	171	159	219	214	188	152	158	151	218	181	172	146	143	136	232	205	177	185	207	197
	1899-12-31 10:08:38	37.1	195	179	164	169	160	217	218	167	160	154	142	210	197	183	160	174	177	228	226	170	137	142	156	199	180	199	170	185	154	210	209	165	159	156	148	206	179	145	149	147	140	218	212	150	183	202	193
	1899-12-31 10:18:38	37	192	184	179	161	160	215	213	155	155	161	130	214	207	208	169	173	167	211	207	148	160	140	153	221	183	194	170	185	147	229	223	162	166	159	140	221	217	168	138	139	163	232	212	182	186	221	219
	1899-12-31 10:28:38	37	170	202	170	154	159	226	213	150	154	157	151	208	193	204	162	172	158	221	233	141	131	140	142	217	196	205	193	174	162	217	229	142	150	154	149	212	202	150	158	160	156	234	234	161	207	209	209
	1899-12-31 10:38:38	37	202	215	172	165	161	222	233	157	147	147	152	216	206	221	176	170	168	256	237	142	148	140	129	198	188	205	183	184	159	230	230	169	152	150	156	222	189	170	152	145	141	229	247	166	184	236	217
	1899-12-31 10:48:38	37	200	208	164	194	145	237	213	151	150	132	152	190	201	243	167	181	174	237	242	163	152	138	147	231	212	238	180	197	159	243	239	170	136	161	164	259	231	176	146	185	129	233	256	166	179	249	245
	1899-12-31 10:58:38	37	236	200	166	168	160	249	225	159	142	152	137	234	214	216	183	172	158	253	241	171	136	149	126	222	208	252	191	203	164	232	249	178	145	167	165	234	226	165	167	140	138	247	246	158	192	251	236
	1899-12-31 11:08:38	37	199	225	190	168	161	241	289	145	141	157	166	240	211	230	203	192	157	232	254	163	153	169	152	239	245	230	204	197	155	248	253	158	161	157	146	264	213	152	152	147	153	278	269	166	211	277	250
	1899-12-31 11:18:38	37	212	225	175	176	152	232	255	164	152	150	140	245	229	240	194	168	143	230	247	173	147	129	174	246	219	249	187	198	162	217	264	162	163	162	132	227	231	180	168	147	142	255	270	169	191	278	274
	1899-12-31 11:28:38	37	225	238	191	172	148	251	253	176	139	140	147	253	266	260	202	179	166	286	268	150	141	147	162	229	255	295	199	204	156	257	265	160	166	161	142	260	245	200	165	152	171	293	287	162	207	275	256
	1899-12-31 11:38:38	37	240	271	178	184	150	252	248	157	143	160	147	244	241	261	203	191	148	274	268	156	135	140	164	265	225	287	197	217	144	253	298	182	137	148	133	286	227	175	137	164	149	299	275	156	212	325	297
	1899-12-31 11:48:38	37	253	294	192	196	148	275	266	168	137	149	147	279	262	285	196	200	157	273	279	161	161	166	145	262	266	267	222	204	159	264	292	176	164	127	146	284	261	154	139	144	154	299	317	150	190	303	307
	1899-12-31 11:58:38	37.1	264	271	184	200	170	317	298	163	156	142	143	288	257	286	218	204	163	304	294	168	139	148	142	264	276	315	212	216	171	281	281	168	155	170	141	290	262	188	149	155	150	321	325	170	211	339	297
	1899-12-31 12:08:38	37.1	277	301	205	195	168	311	287	149	165	150	130	291	292	294	223	209	176	283	306	163	157	151	135	300	287	313	231	203	151	286	299	150	166	149	147	283	255	166	151	146	166	332	355	158	211	334	302
	1899-12-31 12:18:38	37.1	285	287	213	186	154	314	318	180	141	148	159	295	296	323	220	170	151	291	336	152	151	145	153	295	293	302	236	196	145	298	299	156	154	149	119	317	276	177	155	136	152	321	331	148	221	325	305
	1899-12-31 12:28:38	37	281	309	212	182	145	354	315	160	144	136	152	295	300	315	210	187	165	321	297	162	148	147	168	318	311	333	258	203	144	313	295	192	150	164	144	296	298	173	154	172	156	365	334	153	236	324	335
	1899-12-31 12:38:38	37	309	318	213	204	160	329	356	171	167	147	129	337	312	299	241	189	167	339	326	166	156	161	162	302	342	346	250	190	169	326	334	173	138	152	164	342	314	168	144	154	133	299	332	170	214	309	345
	1899-12-31 12:48:38	37	346	331	236	186	162	356	349	174	159	167	135	355	307	344	218	189	172	331	327	161	151	150	146	329	361	375	252	205	178	319	349	168	160	149	148	350	318	198	179	151	149	363	351	164	229	345	363
	1899-12-31 12:58:38	37.1	351	377	240	188	153	366	331	143	147	137	136	376	351	334	242	196	177	335	347	173	150	152	166	340	366	349	232	213	175	327	352	166	166	156	158	371	329	202	154	164	160	373	371	164	239	374	368
	1899-12-31 13:08:38	37.1	357	370	236	202	142	353	369	157	142	150	146	376	353	374	263	187	166	345	325	168	139	146	142	319	370	368	259	179	142	352	379	158	180	145	153	382	324	205	157	158	154	352	344	151	251	383	357
	1899-12-31 13:18:38	37.1	389	382	252	187	164	409	396	152	135	153	134	399	387	354	242	190	169	379	369	172	140	131	160	361	365	367	260	210	171	339	372	162	163	157	127	413	368	200	162	138	156	387	374	157	233	336	389
	1899-12-31 13:28:38	37	380	400	292	206	146	381	383	154	152	149	146	411	390	351	252	187	163	381	367	135	132	147	139	387	379	382	271	206	182	420	381	172	153	129	170	414	361	195	162	148	151	383	385	162	269	386	413
	1899-12-31 13:38:38	37	424	418	222	197	149	379	422	172	146	156	153	396	405	386	245	189	160	410	380	177	130	149	145	372	393	370	247	206	159	392	381	148	148	155	143	434	379	206	149	143	142	388	428	172	248	407	412
	1899-12-31 13:48:38	37	440	417	243	187	143	413	399	175	147	148	151	441	394	394	256	201	169	395	393	161	159	148	142	404	420	364	293	206	159	371	382	175	164	153	138	431	371	224	164	170	139	465	434	169	266	406	381
	1899-12-31 13:58:38	37	454	423	248	196	157	413	395	143	147	146	135	479	422	408	260	185	183	396	427	168	154	161	142	416	412	433	270	216	176	367	396	165	148	143	142	419	408	237	146	153	146	422	418	160	268	422	427
	1899-12-31 14:08:38	37	438	450	261	196	170	428	479	163	162	150	131	479	413	456	255	202	166	422	422	161	158	143	159	427	442	426	262	198	153	432	434	164	149	148	172	485	400	216	149	164	152	434	430	158	291	414	439
	1899-12-31 14:18:38	37.1	487	491	265	222	166	428	452	156	154	141	150	479	421	463	271	191	170	421	439	172	148	132	135	435	440	491	267	206	159	408	430	208	175	163	149	471	413	237	161	158	148	435	469	173	271	442	453
	1899-12-31 14:28:38	37.1	467	526	253	193	171	447	465	164	137	136	147	511	432	476	266	212	154	442	417	156	141	138	137	430	453	532	265	207	183	424	415	171	171	150	140	482	444	225	154	137	163	454	439	190	297	464	452
	1899-12-31 14:38:38	37	530	548	246	184	141	484	462	169	147	147	128	503	450	505	246	186	154	443	421	166	132	136	153	441	487	534	271	197	160	444	450	154	149	156	150	469	407	230	148	145	139	472	487	175	295	444	454
	1899-12-31 14:48:38	37	516	558	248	188	147	488	505	156	142	154	114	540	458	571	247	200	146	464	435	144	145	148	142	490	482	552	256	214	148	458	476	155	146	158	138	511	424	231	135	149	155	481	491	181	345	471	466
	1899-12-31 14:58:38	37	556	594	257	192	137	508	522	170	134	172	148	509	478	545	240	230	158	448	453	159	151	133	142	501	496	569	268	214	154	488	469	192	134	162	119	547	442	231	159	150	148	511	501	158	337	488	488
	1899-12-31 15:08:38	37	590	593	261	174	160	521	517	141	158	149	135	592	483	544	246	198	153	469	426	170	162	158	145	542	511	572	272	194	175	503	504	166	167	171	135	553	440	248	162	158	156	497	499	171	354	490	519
	1899-12-31 15:18:38	37.1	556	620	262	183	160	528	517	153	152	142	160	534	473	580	256	213	144	448	440	165	156	137	154	549	510	609	305	194	175	494	498	162	148	139	160	591	456	239	153	152	159	547	538	151	374	547	498
	1899-12-31 15:28:38	37.1	612	601	260	205	169	565	538	159	161	151	136	581	526	569	262	206	139	487	476	165	139	134	148	581	558	583	249	203	152	539	509	164	147	166	132	590	462	294	183	140	148	562	540	172	370	511	545
	1899-12-31 15:38:38	37	584	624	236	184	145	579	587	152	157	144	156	639	510	591	252	192	166	498	492	160	144	143	149	585	577	590	266	201	152	524	555	167	181	161	158	602	505	295	142	155	164	533	586	146	387	564	545
	1899-12-31 15:48:38	37	679	626	241	196	153	606	566	146	159	141	163	669	580	592	263	198	159	502	491	169	146	146	155	611	652	609	283	196	158	525	525	179	137	139	150	631	531	262	137	154	158	523	565	163	382	540	557
	1899-12-31 15:58:38	37	806	661	254	187	152	620	590	160	131	164	136	616	664	601	252	198	146	523	487	153	146	147	150	617	673	659	257	227	156	591	564	177	145	145	162	608	522	298	151	134	166	622	579	159	377	592	566
	1899-12-31 16:08:38	37	814	689	225	173	181	621	606	136	159	143	159	717	662	586	272	209	186	541	537	149	151	145	128	626	718	593	283	227	157	603	574	150	156	148	142	688	517	278	145	143	165	597	617	167	408	574	609
	1899-12-31 16:18:38	37.1	845	660	257	202	148	622	625	151	153	138	154	712	747	610	249	203	179	543	542	170	148	152	165	640	754	617	264	228	156	595	600	162	160	136	137	668	535	294	159	154	132	618	588	169	425	595	563
	1899-12-31 16:28:38	37	907	675	272	208	162	643	645	161	173	155	156	739	748	607	256	194	166	560	583	165	173	152	159	685	743	660	262	196	164	601	583	156	139	143	143	675	591	288	156	174	155	626	606	159	450	597	626
	1899-12-31 16:38:38	37.1	921	672	234	187	161	676	663	162	150	154	142	761	791	587	221	190	170	585	567	136	147	147	149	664	829	689	274	204	158	612	619	167	131	139	153	690	606	330	140	159	131	641	643	151	449	587	632
	1899-12-31 16:48:38	37	932	674	234	185	163	644	650	179	137	133	140	730	818	606	246	200	173	597	600	154	158	140	148	688	849	651	291	192	155	606	618	164	141	156	146	729	629	300	172	149	146	624	660	159	450	630	649
	1899-12-31 16:58:38	37	994	713	253	178	168	708	687	130	135	164	137	775	801	638	249	189	148	627	621	171	122	163	151	695	860	725	272	223	150	659	619	165	151	155	165	721	646	334	168	155	146	653	598	159	483	625	647
	1899-12-31 17:08:38	37	979	717	245	209	142	725	681	151	131	139	146	786	837	634	232	217	160	621	641	161	158	154	145	741	896	688	297	213	169	641	667	160	138	144	161	772	675	355	156	153	133	683	647	182	482	637	637
	1899-12-31 17:18:38	37	1004	712	222	203	138	797	724	159	141	135	140	792	841	649	242	200	186	651	622	163	142	161	144	741	882	701	284	210	175	687	657	158	155	130	147	744	696	356	170	145	155	694	688	175	499	646	680
	1899-12-31 17:28:38	37.1	993	783	265	192	173	779	776	153	161	149	163	836	884	679	262	188	166	704	658	179	164	145	162	756	901	734	287	217	168	673	646	165	152	157	156	792	728	348	156	138	152	662	680	150	485	683	708
	1899-12-31 17:38:38	37	1073	722	250	189	162	765	766	157	165	147	164	865	888	639	258	199	158	722	688	189	135	142	139	793	930	727	270	229	152	687	716	178	162	153	153	795	716	360	168	151	156	706	712	158	534	706	700
	1899-12-31 17:48:38	37.1	1035	772	246	199	141	792	781	157	160	143	135	914	898	632	239	186	159	732	683	178	140	143	135	818	918	717	291	202	145	730	702	153	156	145	144	781	761	377	155	158	150	705	718	171	544	667	710
	1899-12-31 17:58:38	37	1071	795	247	191	169	798	795	156	144	138	151	919	908	639	255	198	167	684	692	180	153	148	156	860	938	730	291	215	136	708	669	156	148	143	152	850	802	364	146	140	160	719	725	166	562	688	720
	1899-12-31 18:08:38	37	1103	828	258	173	158	839	833	171	167	144	151	966	953	665	235	211	181	727	691	155	138	148	145	826	964	690	300	227	158	722	732	176	164	149	158	918	845	396	147	142	165	727	761	181	577	697	690
	1899-12-31 18:18:38	37	1068	855	272	180	177	852	849	144	138	145	150	978	911	694	251	205	163	755	739	159	149	164	145	865	1014	790	312	206	171	801	752	165	146	151	161	870	915	419	142	150	140	796	753	167	572	732	748
	1899-12-31 18:28:38	37.1	1133	867	255	196	154	861	839	152	150	152	134	963	946	678	256	218	159	775	698	160	155	148	141	881	964	779	295	214	192	788	724	175	150	149	131	870	937	426	162	170	149	771	763	174	617	750	753
	1899-12-31 18:38:38	37.1	1098	808	232	216	170	899	852	161	149	136	131	994	980	699	270	218	149	753	692	156	167	158	154	874	967	778	288	204	173	757	753	191	146	144	158	926	971	404	139	147	150	780	799	173	617	794	803
	1899-12-31 18:48:38	37.1	1191	867	235	214	138	915	905	162	143	133	152	1038	950	674	248	198	187	739	750	160	148	160	161	852	961	747	291	222	166	785	796	163	140	155	165	954	1018	426	151	134	152	819	809	168	615	789	760
	1899-12-31 18:58:38	37	1153	874	233	186	163	881	920	156	154	147	135	1033	961	663	254	201	162	756	751	169	146	138	149	943	968	761	275	220	155	774	841	152	152	141	148	966	1039	409	175	151	174	839	793	162	622	768	788
	1899-12-31 19:08:38	37	1136	885	269	203	148	980	969	167	143	161	138	1104	977	708	260	204	155	806	794	158	145	134	159	953	1015	758	290	215	161	792	827	165	159	145	149	985	1085	452	164	135	149	815	836	157	654	806	809
	1899-12-31 19:18:38	37	1133	920	231	187	142	1010	960	152	141	130	161	1050	1033	723	267	196	165	797	737	171	140	145	153	957	1048	799	314	204	186	841	788	165	136	145	163	988	1149	447	160	173	155	808	875	169	680	804	830
	1899-12-31 19:28:38	37	1152	940	253	188	180	971	948	166	134	158	146	1096	999	730	250	202	164	818	766	154	141	160	151	973	1004	766	316	209	176	822	843	161	159	141	129	1046	1122	460	153	153	143	863	868	167	702	850	820
	1899-12-31 19:38:38	37.1	1244	906	239	177	149	1029	944	177	130	138	155	1150	1006	720	240	220	186	825	760	163	166	149	146	1034	1010	751	296	199	169	815	871	145	141	142	146	999	1190	457	145	159	150	805	861	161	693	855	829
	1899-12-31 19:48:38	37	1168	941	238	186	171	1032	1011	128	160	141	140	1076	1048	729	245	196	155	835	758	179	132	147	164	1033	1051	745	309	224	173	826	879	179	140	153	144	1037	1171	504	160	154	164	861	864	162	712	829	865
	1899-12-31 19:58:38	37	1227	942	267	184	145	1041	1046	151	147	142	149	1194	989	736	235	200	169	840	817	158	142	114	138	1006	1022	756	300	202	177	858	865	140	167	158	142	1052	1160	502	156	158	142	852	856	173	730	858	853
	1899-12-31 20:08:38	37	1245	965	237	179	171	1042	1008	148	126	143	132	1197	1078	698	254	207	165	862	852	163	142	144	149	1090	993	789	299	205	179	851	835	174	149	159	154	1042	1175	491	146	148	155	904	906	154	760	850	854
	1899-12-31 20:18:38	37	1227	1008	268	184	150	1076	1088	162	167	150	153	1251	1053	752	234	195	169	891	853	185	154	140	147	1102	1078	782	289	214	167	870	906	160	154	123	134	1117	1161	545	146	159	152	895	919	192	783	886	877
	1899-12-31 20:28:38	37	1296	970	254	188	164	1094	1090	163	137	148	130	1257	1060	754	245	183	165	902	825	174	139	141	160	1088	1074	768	301	219	155	910	906	141	160	144	162	1129	1219	549	150	143	135	906	891	168	802	892	917
	1899-12-31 20:38:38	37.1	1265	1021	267	204	164	1167	1136	173	144	137	142	1248	1032	757	255	177	181	880	894	162	153	154	148	1136	1058	775	305	205	155	909	955	165	157	137	141	1136	1270	570	147	177	160	887	912	166	818	892	859
	1899-12-31 20:48:38	37.1	1276	1042	268	206	153	1186	1133	170	155	144	153	1238	1096	734	241	176	165	918	909	151	163	156	149	1096	1116	798	321	198	156	911	911	158	164	140	161	1158	1220	591	163	131	157	918	916	170	843	925	904
	1899-12-31 20:58:38	37.1	1293	975	268	190	146	1169	1154	147	153	138	144	1316	1109	784	246	192	157	946	918	159	165	157	163	1195	1050	789	313	221	174	900	929	160	161	146	140	1178	1304	598	168	147	162	930	861	176	803	870	902
	1899-12-31 21:08:38	37	1261	964	247	179	147	1134	1188	138	138	141	136	1370	1090	776	240	198	157	901	890	161	142	136	150	1179	1117	806	300	204	149	897	921	174	148	148	147	1165	1305	570	153	152	148	932	942	166	840	912	908
	1899-12-31 21:18:38	37	1349	1019	294	175	162	1189	1160	179	132	149	140	1386	1131	771	261	189	187	951	904	172	135	154	157	1177	1119	776	296	214	172	990	936	144	140	143	156	1219	1310	597	162	170	162	925	980	155	866	890	968
	1899-12-31 21:28:38	37	1301	1001	248	192	177	1184	1245	151	148	149	148	1365	1106	797	262	183	187	955	907	158	168	148	169	1232	1173	810	320	229	166	1007	995	173	132	143	154	1249	1382	626	143	161	143	982	947	164	838	972	950
	1899-12-31 21:38:38	37	1340	979	298	192	165	1257	1184	142	139	145	149	1347	1085	724	247	188	177	975	944	158	142	145	131	1232	1146	826	321	212	169	1012	969	154	165	158	138	1246	1386	637	160	153	165	952	981	165	844	1018	946
	1899-12-31 21:48:38	37	1352	1019	257	192	142	1244	1267	149	158	116	141	1381	1124	767	248	195	164	990	929	162	136	139	152	1238	1177	800	331	218	150	1031	998	168	172	160	132	1321	1412	646	153	140	152	899	940	196	874	931	960
	1899-12-31 21:58:38	37	1438	1016	270	203	160	1278	1252	160	149	151	125	1466	1148	838	237	211	178	968	1034	180	157	144	152	1287	1156	833	287	224	193	1028	1011	176	141	162	170	1337	1342	650	154	136	159	990	982	164	954	965	1009
	1899-12-31 22:08:38	37	1358	1094	264	203	169	1301	1243	154	145	128	140	1419	1111	817	246	194	172	1019	931	172	140	157	128	1307	1164	784	343	229	161	1002	1021	166	138	157	140	1300	1326	648	146	156	159	1008	993	154	897	912	1021
	1899-12-31 22:18:38	37	1433	1023	298	193	158	1297	1312	144	157	148	134	1408	1172	840	248	194	155	1006	1000	161	152	152	171	1282	1176	883	322	232	175	1010	1070	157	155	140	147	1293	1221	640	145	156	159	1021	981	155	964	968	1037
	1899-12-31 22:28:38	37	1366	1016	279	201	158	1376	1361	153	151	126	146	1511	1222	802	279	209	164	962	977	172	131	149	125	1390	1224	845	321	225	161	1036	1056	167	138	139	168	1386	1256	696	151	165	148	1006	999	170	961	999	1007
	1899-12-31 22:38:38	37	1432	1052	301	182	155	1314	1330	168	139	122	154	1522	1176	827	236	187	174	1041	1056	158	152	142	158	1320	1244	889	316	216	153	1066	1049	161	162	143	148	1344	1291	699	180	155	147	1036	990	174	935	1009	1036
	1899-12-31 22:48:38	37.1	1423	1061	274	194	169	1386	1358	154	162	134	146	1522	1205	796	247	177	165	1043	1038	153	151	163	145	1355	1219	858	315	199	173	1067	1106	161	128	140	171	1388	1274	664	163	160	152	1011	1037	183	932	994	999
	1899-12-31 22:58:38	37.1	1400	1054	301	202	178	1396	1334	139	146	158	136	1571	1193	837	279	216	168	1030	1029	159	155	165	144	1410	1264	883	320	233	176	1080	1054	180	149	163	142	1365	1283	676	164	142	164	1047	1033	165	981	1031	1052
	1899-12-31 23:08:38	37.1	1454	1036	278	197	178	1384	1394	145	149	143	145	1576	1255	829	256	184	162	1113	1055	180	155	153	162	1370	1219	878	328	246	153	1055	1095	143	146	150	142	1468	1265	685	147	153	178	1052	1018	182	995	1035	1034
	1899-12-31 23:18:38	37	1400	1059	273	196	172	1489	1447	163	149	131	147	1581	1186	841	243	212	173	1115	1022	160	131	144	145	1485	1244	850	308	223	161	1069	1092	147	150	153	149	1462	1291	743	145	142	148	1023	1032	185	1035	1068	1084
	1899-12-31
	1899-12-31
	1899-12-31
	1899-12-31
	1899-12-31
	1899-12-31
	1899-12-31
	1899-12-31
	1899-12-31
	1899-12-31
	1899-12-31
	1899-12-31
	1899-12-31
	1899-12-31
	1899-12-31
	1899-12-31
	1899-12-31
	1899-12-31
	1899-12-31
	1899-12-31
	1899-12-31
	1899-12-31
	1899-12-31
	1899-12-31
	1899-12-31
	1899-12-31
	1899-12-31
	1899-12-31
	1899-12-31
	1899-12-31
	1899-12-31
	1899-12-31
	1899-12-31
	1899-12-31
	1899-12-31
	1899-12-31
	1899-12-31
	1899-12-31
	1899-12-31
	1899-12-31
	1899-12-31
	1899-12-31
	1899-12-31
	1899-12-31
	1899-12-31
	1899-12-31
	1899-12-31
	1899-12-31
	1899-12-31
	1899-12-31
	1899-12-31
	1899-12-31
	1899-12-31
	1899-12-31
	1899-12-31
	1899-12-31
	1899-12-31
	1899-12-31
	1899-12-31
	1899-12-31
	1899-12-31
	1899-12-31
	1899-12-31
	1899-12-31
	1899-12-31
	1899-12-31
	1899-12-31
	1899-12-31
	1899-12-31
	1899-12-31
	1899-12-31
	1899-12-31
	1899-12-31
	1899-12-31
	1899-12-31
	1899-12-31
	1899-12-31
	1899-12-31
	1899-12-31
	1899-12-31
	1899-12-31
	1899-12-31
	1899-12-31
	1899-12-31
	1899-12-31
	1899-12-31
	1899-12-31
	1899-12-31
	1899-12-31
	1899-12-31
	1899-12-31
	1899-12-31
	1899-12-31
	1899-12-31
	1899-12-31
	1899-12-31
	1899-12-31
	1899-12-31
	1899-12-31
	1899-12-31
	1899-12-31
	1899-12-31
	1899-12-31
	1899-12-31
	1899-12-31
	1899-12-31
	1899-12-31
	1899-12-31
	1899-12-31
	1899-12-31
	1899-12-31
	1899-12-31
	1899-12-31
	1899-12-31
	1899-12-31
	1899-12-31
	1899-12-31
	1899-12-31
	1899-12-31
	1899-12-31
	1899-12-31
	1899-12-31
	1899-12-31
	1899-12-31
	1899-12-31
	1899-12-31
	1899-12-31
	1899-12-31
	1899-12-31
	1899-12-31
	1899-12-31
	1899-12-31
	1899-12-31
	1899-12-31
	1899-12-31
	1899-12-31
	1899-12-31
	1899-12-31
	1899-12-31
	1899-12-31
	1899-12-31
	1899-12-31
	1899-12-31
	1899-12-31
	1899-12-31
	1899-12-31
	1899-12-31
	1899-12-31
	1899-12-31
	1899-12-31
	1899-12-31
	1899-12-31
	1899-12-31
	1899-12-31
	1899-12-31
	1899-12-31
	1899-12-31
	1899-12-31
	1899-12-31
	1899-12-31
	1899-12-31
	1899-12-31
	1899-12-31
	1899-12-31
	1899-12-31
	1899-12-31
	1899-12-31
	1899-12-31
	1899-12-31
	1899-12-31
	1899-12-31
	1899-12-31
	1899-12-31
	1899-12-31
	1899-12-31
	1899-12-31
	1899-12-31
	1899-12-31
	1899-12-31
	1899-12-31
	1899-12-31
	1899-12-31
	1899-12-31
	1899-12-31
	1899-12-31
	1899-12-31
	1899-12-31
	1899-12-31
	1899-12-31
	1899-12-31
	1899-12-31
	1899-12-31
	1899-12-31
	1899-12-31
	1899-12-31
	1899-12-31
	1899-12-31
	1899-12-31
	1899-12-31
	1899-12-31
	1899-12-31
	1899-12-31
	1899-12-31
	1899-12-31
	1899-12-31
	1899-12-31
	1899-12-31
	1899-12-31
	1899-12-31
	1899-12-31
	1899-12-31
	1899-12-31
	1899-12-31
	1899-12-31
	1899-12-31
	1899-12-31
	1899-12-31
	1899-12-31
	1899-12-31
	1899-12-31
	1899-12-31
	1899-12-31
	1899-12-31
	1899-12-31
	1899-12-31
	1899-12-31
	1899-12-31
	1899-12-31
	1899-12-31
	1899-12-31
	1899-12-31
	1899-12-31
	1899-12-31
	1899-12-31
	1899-12-31
	1899-12-31
	1899-12-31
	1899-12-31
	1899-12-31
	1899-12-31
	1899-12-31
	1899-12-31
	1899-12-31
	1899-12-31
	1899-12-31
	1899-12-31
	1899-12-31
	1899-12-31
	1899-12-31
	1899-12-31
	1899-12-31
	1899-12-31
	1899-12-31
	1899-12-31
	1899-12-31
	1899-12-31
	1899-12-31
	1899-12-31
	1899-12-31
	1899-12-31
	1899-12-31
	1899-12-31
	1899-12-31
	1899-12-31
	1899-12-31
	1899-12-31
	1899-12-31
	1899-12-31
	1899-12-31
	1899-12-31
	1899-12-31
	1899-12-31
	1899-12-31
	1899-12-31
	1899-12-31
	1899-12-31
	1899-12-31
	1899-12-31
	1899-12-31
	1899-12-31
	1899-12-31
	1899-12-31
	1899-12-31
	1899-12-31
	1899-12-31
	1899-12-31
	1899-12-31
	1899-12-31
	1899-12-31
	1899-12-31
	1899-12-31
	1899-12-31
	1899-12-31
	1899-12-31
	1899-12-31
	1899-12-31
	1899-12-31
	1899-12-31
	1899-12-31
	1899-12-31
	1899-12-31
	1899-12-31
	1899-12-31
	1899-12-31
	1899-12-31
	1899-12-31
	1899-12-31
	1899-12-31
	1899-12-31
	1899-12-31
	1899-12-31
	1899-12-31
	1899-12-31
	1899-12-31
	1899-12-31
	1899-12-31
	1899-12-31
	1899-12-31
	1899-12-31
	1899-12-31
	1899-12-31
	1899-12-31
	1899-12-31
	1899-12-31
	1899-12-31
	1899-12-31
	1899-12-31
	1899-12-31
	1899-12-31
	1899-12-31
	1899-12-31
	1899-12-31
	1899-12-31
	1899-12-31
	1899-12-31
	1899-12-31
	1899-12-31
	1899-12-31
	1899-12-31
	1899-12-31
	1899-12-31
	1899-12-31
	1899-12-31
	1899-12-31
	1899-12-31
	1899-12-31
	1899-12-31
	1899-12-31
	1899-12-31
	1899-12-31
	1899-12-31
	1899-12-31
	1899-12-31
	1899-12-31
	1899-12-31
	1899-12-31
	1899-12-31
	1899-12-31
	1899-12-31
	1899-12-31
	1899-12-31
	1899-12-31
	1899-12-31
	1899-12-31
	1899-12-31
	1899-12-31
	1899-12-31
	1899-12-31
	1899-12-31
	1899-12-31
	1899-12-31
	1899-12-31
	1899-12-31
	1899-12-31
	1899-12-31
	1899-12-31
	1899-12-31
	1899-12-31
	1899-12-31
	1899-12-31
	1899-12-31
	1899-12-31
	1899-12-31
	1899-12-31
	1899-12-31
	1899-12-31
	1899-12-31
	1899-12-31
	1899-12-31
	1899-12-31
	1899-12-31
	1899-12-31
	1899-12-31
	1899-12-31
	1899-12-31
	1899-12-31
	1899-12-31
	1899-12-31
	1899-12-31
	1899-12-31
	1899-12-31
	1899-12-31
	1899-12-31
	1899-12-31
	1899-12-31
	1899-12-31
	1899-12-31
	1899-12-31
	1899-12-31
	1899-12-31
	1899-12-31
	1899-12-31
	1899-12-31
	1899-12-31
	1899-12-31
	1899-12-31
	1899-12-31
	1899-12-31
	1899-12-31
	1899-12-31
	1899-12-31
	1899-12-31
	1899-12-31
	1899-12-31
	1899-12-31
	1899-12-31
	1899-12-31
	1899-12-31
	1899-12-31
	1899-12-31
	1899-12-31
	1899-12-31
	1899-12-31
	1899-12-31
	1899-12-31
	1899-12-31
	1899-12-31
	1899-12-31
	1899-12-31
	1899-12-31
	1899-12-31
	1899-12-31
	1899-12-31
	1899-12-31
	1899-12-31
	1899-12-31
	1899-12-31
	1899-12-31
	1899-12-31
	1899-12-31
	1899-12-31
	1899-12-31
	1899-12-31
	1899-12-31
	1899-12-31
	1899-12-31
	1899-12-31
	1899-12-31
	1899-12-31
	1899-12-31
	1899-12-31
	1899-12-31
	1899-12-31
	1899-12-31
	1899-12-31
	1899-12-31
	1899-12-31
	1899-12-31
	1899-12-31
	1899-12-31
	1899-12-31
	1899-12-31
	1899-12-31
	1899-12-31
	1899-12-31
	1899-12-31
	1899-12-31
	1899-12-31
	1899-12-31
	1899-12-31
	1899-12-31
	1899-12-31
	1899-12-31
	1899-12-31
	1899-12-31
	1899-12-31
	1899-12-31
	1899-12-31
	1899-12-31
	1899-12-31
	1899-12-31
	1899-12-31
	1899-12-31
	1899-12-31
	1899-12-31
	1899-12-31
	1899-12-31
	1899-12-31
	1899-12-31
	1899-12-31
	1899-12-31
	1899-12-31
	1899-12-31
	1899-12-31
	1899-12-31
	1899-12-31
	1899-12-31
	1899-12-31
	1899-12-31
	1899-12-31
	1899-12-31
	1899-12-31
	1899-12-31
	1899-12-31
	1899-12-31
	1899-12-31
	1899-12-31
	1899-12-31
	1899-12-31
	1899-12-31
	1899-12-31
	1899-12-31
	1899-12-31
	1899-12-31
	1899-12-31
	1899-12-31
	1899-12-31
	1899-12-31
	1899-12-31
	1899-12-31
	1899-12-31
	1899-12-31
	1899-12-31
	1899-12-31
	1899-12-31
	1899-12-31
	1899-12-31
	1899-12-31
	1899-12-31
	1899-12-31
	1899-12-31
	1899-12-31
	1899-12-31
	1899-12-31
	1899-12-31
	1899-12-31
	1899-12-31
	1899-12-31
	1899-12-31
	1899-12-31
	1899-12-31
	1899-12-31
	1899-12-31
	1899-12-31
	1899-12-31
	1899-12-31
	1899-12-31
	1899-12-31
	1899-12-31
	1899-12-31
	1899-12-31
	1899-12-31
	1899-12-31
	1899-12-31
	1899-12-31
	1899-12-31
	1899-12-31
	1899-12-31
	1899-12-31
	1899-12-31
	1899-12-31
	1899-12-31
	1899-12-31
	1899-12-31
	1899-12-31
	1899-12-31
	1899-12-31
	1899-12-31
	1899-12-31
	1899-12-31
	1899-12-31
	1899-12-31
	1899-12-31
	1899-12-31
	1899-12-31
	1899-12-31
	1899-12-31
	1899-12-31
	1899-12-31
	1899-12-31
	1899-12-31
	1899-12-31
	1899-12-31
	1899-12-31
	1899-12-31
	1899-12-31
	1899-12-31
	1899-12-31
	1899-12-31
	1899-12-31
	1899-12-31
	1899-12-31
	1899-12-31
	1899-12-31
	1899-12-31
	1899-12-31
	1899-12-31
	1899-12-31
	1899-12-31
	1899-12-31
	1899-12-31
	1899-12-31
	1899-12-31
	1899-12-31
	1899-12-31
	1899-12-31
	1899-12-31
	1899-12-31
	1899-12-31
	1899-12-31
	1899-12-31
	1899-12-31
	1899-12-31
	1899-12-31
	1899-12-31
	1899-12-31
	1899-12-31
	1899-12-31
	1899-12-31
	1899-12-31
	1899-12-31
	1899-12-31
	1899-12-31
	1899-12-31
	1899-12-31
	1899-12-31
	1899-12-31
	1899-12-31
	1899-12-31
	1899-12-31
	1899-12-31
	1899-12-31
	1899-12-31
	1899-12-31
	1899-12-31
	1899-12-31
	1899-12-31
	1899-12-31
	1899-12-31
	1899-12-31
	1899-12-31
	1899-12-31
	1899-12-31
	1899-12-31
	1899-12-31
	1899-12-31
	1899-12-31
	1899-12-31
	1899-12-31
	1899-12-31
	1899-12-31
	1899-12-31
	1899-12-31
	1899-12-31
	1899-12-31
	1899-12-31
	1899-12-31
	1899-12-31
	1899-12-31
	1899-12-31
	1899-12-31
	1899-12-31
	1899-12-31
	1899-12-31
	1899-12-31
	1899-12-31
	1899-12-31
	1899-12-31
	1899-12-31
	1899-12-31
	1899-12-31
	1899-12-31
	1899-12-31
	1899-12-31
	1899-12-31
	1899-12-31
	1899-12-31
	1899-12-31
	1899-12-31
	1899-12-31
	1899-12-31
	1899-12-31
	1899-12-31
	1899-12-31
	1899-12-31
	1899-12-31
	1899-12-31
	1899-12-31
	1899-12-31
	1899-12-31
	1899-12-31
	1899-12-31
	1899-12-31
	1899-12-31
	1899-12-31
	1899-12-31
	1899-12-31
	1899-12-31
	1899-12-31
	1899-12-31
	1899-12-31
	1899-12-31
	1899-12-31
	1899-12-31
	1899-12-31
	1899-12-31
	1899-12-31
	1899-12-31
	1899-12-31
	1899-12-31
	1899-12-31
	1899-12-31
	1899-12-31
	1899-12-31
	1899-12-31
	1899-12-31
	1899-12-31
Read 3:425,475
	Time	T° Read 3:425,475	A1	A2	A3	A4	A5	A6	A7	A8	A9	A10	A11	A12	B1	B2	B3	B4	B5	B6	B7	B8	B9	B10	B11	B12	C1	C2	C3	C4	C5	C6	C7	C8	C9	C10	C11	C12	D1	D2	D3	D4	D5	D6	D7	D8	D9	D10	D11
	1899-12-31 00:09:17	37	798	786	770	797	800	825	782	938	859	773	806	816	876	827	830	753	827	894	810	936	845	740	848	808	830	775	799	852	807	838	842	918	766	859	813	831	933	820	844	798	798	803	759	942	767	796	818
	1899-12-31 00:19:17	37	796	801	820	797	776	791	829	937	881	779	758	838	828	811	744	750	777	899	869	1004	803	748	837	786	829	751	824	802	804	813	833	890	769	784	767	864	943	758	820	784	778	819	736	884	781	799	770
	1899-12-31 00:29:17	37	795	778	746	775	788	779	772	947	864	783	788	842	826	769	799	775	737	923	810	979	770	721	804	788	786	748	823	783	793	832	844	896	808	787	768	836	928	758	835	790	788	833	738	920	741	760	790
	1899-12-31 00:39:17	37	808	839	760	768	810	837	825	905	824	774	780	849	842	795	770	767	800	899	832	907	781	732	806	783	802	765	808	819	759	816	803	902	796	800	773	831	907	803	758	766	772	804	745	900	796	750	738
	1899-12-31 00:49:17	37.1	749	766	808	788	796	756	805	928	827	790	778	765	848	786	747	795	791	892	805	932	822	771	853	759	833	767	734	798	769	842	820	882	802	828	771	780	931	786	787	760	799	790	719	926	803	815	743
	1899-12-31 00:59:17	37.1	823	803	774	765	794	798	781	959	803	784	746	767	784	790	755	824	765	854	807	923	763	758	790	731	810	798	770	847	774	855	824	893	812	790	782	798	930	769	797	799	772	777	739	896	808	773	800
	1899-12-31 01:09:17	37	827	749	757	778	786	726	753	894	809	772	730	769	792	776	759	757	756	839	777	955	757	732	799	763	808	749	757	806	735	825	813	874	767	801	749	786	939	780	793	790	739	765	733	905	765	784	744
	1899-12-31 01:19:17	37	780	816	755	772	790	761	798	906	801	771	783	814	791	744	743	789	781	889	785	925	773	726	801	770	776	721	790	817	773	848	820	874	789	767	737	796	939	800	814	763	733	793	722	930	763	760	747
	1899-12-31 01:29:17	37	791	790	763	756	776	765	784	890	796	788	791	815	834	796	777	765	744	849	808	958	799	773	796	792	858	794	745	803	705	801	783	912	754	822	759	817	940	758	838	811	767	789	728	916	776	802	756
	1899-12-31 01:39:17	37	756	784	768	778	766	762	751	914	805	789	761	818	808	811	767	786	745	874	815	931	767	788	803	750	760	755	802	807	760	849	793	858	786	808	785	835	912	769	800	753	770	829	727	897	788	752	736
	1899-12-31 01:49:17	37.1	756	780	781	748	749	801	815	871	831	762	748	845	808	800	758	742	799	833	821	963	785	702	815	795	792	751	736	836	763	839	839	914	807	811	768	760	937	745	796	783	774	778	754	941	780	778	728
	1899-12-31 01:59:17	37.1	724	796	779	794	780	802	773	894	837	758	720	799	815	793	732	764	786	859	788	922	709	767	801	775	761	759	755	813	715	821	802	916	795	808	772	797	940	785	796	759	815	790	755	923	791	810	768
	1899-12-31 02:09:17	37	833	729	760	744	757	747	751	902	753	791	742	780	769	781	740	753	722	895	798	881	791	754	842	745	757	759	720	824	758	754	850	903	735	797	733	781	875	748	815	747	751	758	766	924	809	810	774
	1899-12-31 02:19:17	37	785	766	753	792	768	752	830	889	767	742	770	803	814	735	772	807	757	862	803	922	754	782	835	748	750	783	819	768	793	827	832	909	760	775	788	807	901	757	778	784	766	796	741	890	794	752	745
	1899-12-31 02:29:17	37	768	759	744	725	790	797	805	870	767	745	748	799	840	813	731	746	786	873	806	931	742	727	808	760	820	805	763	832	767	897	857	906	793	785	774	798	945	805	784	759	783	796	721	897	800	818	760
	1899-12-31 02:39:17	37	762	774	746	756	781	778	760	925	790	745	752	801	772	820	746	748	782	910	828	900	764	762	814	730	753	774	767	837	725	825	854	891	767	780	811	823	952	775	814	742	756	808	752	926	756	785	757
	1899-12-31 02:49:17	37.1	785	748	756	750	755	796	783	893	833	737	779	812	809	796	772	721	787	867	781	926	764	745	797	746	845	763	778	802	771	834	863	949	764	824	751	795	890	815	780	759	753	821	788	917	782	759	767
	1899-12-31 02:59:17	37	831	773	752	783	819	796	740	903	764	774	749	772	836	756	788	776	784	864	843	882	761	733	807	742	781	785	790	768	757	795	791	879	788	769	734	778	932	742	803	767	762	846	713	898	775	789	735
	1899-12-31 03:09:17	37	771	723	745	732	765	763	806	893	806	750	803	786	798	746	780	809	763	873	813	870	762	771	797	788	789	768	750	790	709	810	827	899	793	770	720	768	963	766	774	719	734	773	776	917	772	824	756
	1899-12-31 03:19:17	37	785	747	746	737	785	791	776	940	801	757	788	759	873	782	743	767	802	881	813	834	810	711	846	753	765	791	804	795	756	826	848	917	782	803	781	803	919	787	781	770	753	802	796	842	767	791	736
	1899-12-31 03:29:17	37	778	755	764	726	806	818	808	898	799	778	716	747	812	765	771	798	766	894	830	894	728	705	787	761	809	812	807	817	772	814	844	932	791	830	756	834	932	785	827	801	739	792	745	910	791	824	783
	1899-12-31 03:39:17	37.1	790	756	760	765	820	811	794	899	793	773	752	768	822	805	760	753	775	866	817	885	816	723	834	731	804	758	730	794	768	828	840	909	790	806	754	785	928	795	822	780	809	765	791	932	796	788	749
	1899-12-31 03:49:17	37	773	751	756	776	784	804	769	902	837	716	737	810	803	772	782	745	787	863	857	886	750	736	824	768	765	737	779	809	774	846	821	913	763	750	783	837	926	794	780	751	776	803	800	893	807	795	783
	1899-12-31 03:59:17	37	790	719	749	764	788	789	757	873	736	764	750	797	834	768	721	760	794	875	845	929	740	754	799	802	755	744	782	804	773	861	832	878	780	749	773	784	910	796	780	763	758	791	748	888	767	837	773
	1899-12-31 04:09:17	37	813	753	725	746	751	747	815	880	828	785	751	825	799	806	754	773	793	869	819	900	787	749	834	775	743	755	753	818	760	827	831	880	790	748	737	788	961	817	790	763	768	807	773	864	824	825	795
	1899-12-31 04:19:17	37	832	807	730	787	800	789	810	893	838	786	748	827	807	805	818	795	791	951	857	913	799	714	774	784	802	763	765	814	789	880	830	899	796	754	782	812	887	802	771	817	778	826	783	888	781	793	795
	1899-12-31 04:29:17	37	763	741	750	766	767	828	851	901	772	761	745	840	783	758	807	779	787	929	865	955	761	750	791	799	786	779	788	829	789	852	886	887	813	799	752	811	964	782	827	777	744	802	789	891	802	782	805
	1899-12-31 04:39:17	37.1	771	728	719	736	765	856	775	916	790	710	767	797	804	828	756	768	826	961	886	899	766	773	816	758	781	759	751	794	805	856	864	909	783	748	786	819	1002	789	802	771	770	845	779	921	804	869	841
	1899-12-31 04:49:17	37	786	804	725	748	784	792	836	884	780	732	731	814	805	794	771	748	795	879	848	963	818	736	834	802	787	792	800	815	785	898	832	860	782	779	727	833	925	751	804	746	759	823	778	922	791	815	813
	1899-12-31 04:59:17	37.1	721	764	725	703	743	785	816	884	756	783	728	858	811	784	763	784	802	921	860	878	751	796	807	774	736	816	790	798	748	853	907	870	796	742	754	875	914	755	785	763	758	845	839	911	810	786	779
	1899-12-31 05:09:17	37	803	773	738	725	771	799	817	889	804	775	792	816	797	799	762	784	835	923	857	904	714	761	780	774	775	800	712	781	753	915	885	908	767	748	805	862	915	830	805	761	748	885	808	898	809	802	767
	1899-12-31 05:19:17	37	766	748	717	768	732	844	872	898	833	727	717	842	856	858	794	743	750	976	888	897	795	723	843	753	819	802	784	803	809	858	888	873	776	769	768	844	886	789	791	744	730	874	822	926	823	782	808
	1899-12-31 05:29:17	37	801	780	751	735	755	829	826	885	789	768	791	867	793	806	780	738	789	927	881	888	772	718	775	801	778	805	783	817	815	921	910	886	792	771	759	855	944	803	855	753	774	882	806	867	834	821	834
	1899-12-31 05:39:17	37.1	781	766	756	767	789	822	826	860	788	731	730	834	842	826	774	811	829	930	853	906	746	763	733	810	762	797	775	800	838	925	895	920	776	769	735	855	902	823	796	776	764	821	838	947	882	870	848
	1899-12-31 05:49:17	37.1	758	788	719	763	771	835	855	898	795	718	722	837	829	791	727	737	822	951	835	922	752	759	803	815	806	791	771	826	777	909	861	874	809	805	735	890	967	806	768	754	772	906	838	946	858	869	790
	1899-12-31 05:59:17	37.1	783	758	729	775	740	846	848	855	789	721	746	826	835	785	820	809	778	936	917	956	754	753	865	808	813	790	777	830	782	932	942	890	803	763	770	845	951	793	792	740	772	892	795	897	822	887	825
	1899-12-31 06:09:17	37	757	776	743	783	787	872	832	863	789	731	768	876	813	797	778	767	830	952	865	858	758	786	771	802	761	783	775	814	770	918	917	867	728	761	762	863	968	786	795	816	787	886	817	907	837	896	807
	1899-12-31 06:19:17	37	776	776	769	796	794	847	811	919	813	747	753	903	778	821	758	770	824	990	943	883	769	791	813	884	811	814	792	831	806	893	893	889	797	767	812	889	974	782	775	767	761	873	846	911	808	842	859
	1899-12-31 06:29:17	37	796	784	728	772	837	852	849	882	798	743	756	890	801	828	750	789	807	1010	895	920	761	739	825	848	833	838	767	807	828	929	939	887	775	768	733	901	1007	840	823	762	770	913	844	923	871	859	867
	1899-12-31 06:39:17	37.1	820	807	756	802	814	895	847	884	813	727	738	899	840	839	749	742	846	989	916	914	779	749	831	864	842	820	806	793	854	936	932	866	812	754	773	970	1019	794	771	799	786	965	917	970	887	927	879
	1899-12-31 06:49:17	37.1	849	827	746	756	828	848	866	864	809	711	714	882	871	822	767	787	839	992	970	916	733	778	827	887	816	809	811	868	784	1024	938	891	792	734	729	964	1025	809	785	746	780	958	893	865	896	901	906
	1899-12-31 06:59:17	37	791	820	746	762	837	819	867	856	777	748	724	933	843	849	776	762	852	1033	942	896	776	720	818	858	861	815	787	831	770	979	925	897	769	754	743	896	995	818	807	781	761	912	882	874	862	909	909
	1899-12-31 07:09:17	37	808	811	732	772	782	867	868	829	810	720	720	901	856	928	778	819	851	1013	998	928	713	757	794	907	847	839	818	818	820	989	995	851	761	795	766	926	971	782	794	759	760	977	918	921	893	923	912
	1899-12-31 07:19:17	37	846	832	774	767	788	892	873	891	771	768	749	892	832	844	779	763	868	1074	1009	951	759	741	829	913	829	871	775	867	826	981	966	857	800	785	784	937	1050	797	804	791	777	969	922	946	859	983	886
	1899-12-31 07:29:17	37	858	841	756	760	856	917	921	878	744	736	755	987	859	854	794	758	878	1084	1020	904	769	760	794	978	817	876	771	854	818	1005	1003	880	797	781	769	956	1032	800	783	804	766	1020	933	914	908	937	916
	1899-12-31 07:39:17	37.1	815	829	754	751	831	923	973	887	757	719	715	922	858	882	810	799	831	1068	1000	897	794	784	834	895	829	830	822	874	875	1014	998	902	812	776	763	991	1033	809	795	788	764	1019	963	895	911	961	941
	1899-12-31 07:49:17	37.1	842	836	742	780	832	941	989	816	790	755	750	983	877	867	832	786	897	1131	1088	898	746	782	796	934	865	817	837	895	860	1056	1037	869	816	803	786	979	1064	779	785	799	772	1048	990	931	944	979	942
	1899-12-31 07:59:17	37.1	872	823	759	797	811	989	977	895	767	709	704	1023	870	895	781	803	853	1099	1042	894	761	735	813	950	829	895	860	787	876	1090	1050	891	791	785	801	986	1121	816	760	740	781	1055	1051	879	940	1031	983
	1899-12-31 08:09:17	37	847	825	794	753	794	993	1012	872	783	731	717	973	895	882	796	784	859	1184	1090	901	746	728	788	991	884	867	819	803	848	1118	1098	854	743	777	768	1121	1107	753	769	733	740	1078	1030	895	961	1015	1032
	1899-12-31 08:19:17	37	882	867	781	812	888	1024	1064	854	755	732	762	1065	888	908	792	818	878	1190	1122	911	736	744	802	1001	859	908	824	873	878	1101	1083	940	789	814	739	1041	1095	863	819	745	763	1154	1050	923	967	1064	1071
	1899-12-31 08:29:17	37	930	889	814	797	825	1036	1054	928	790	778	729	1031	924	917	798	821	844	1219	1108	933	737	764	852	1042	900	970	907	877	855	1159	1179	817	788	788	812	1106	1098	880	838	763	808	1134	1143	920	958	1097	1025
	1899-12-31 08:39:17	37	892	921	754	802	829	1056	1084	922	793	721	734	1077	953	926	807	856	831	1233	1202	912	752	757	774	1108	920	938	878	886	852	1120	1201	896	813	807	766	1170	1150	828	799	796	755	1192	1154	917	975	1103	1051
	1899-12-31 08:49:17	37.1	910	973	776	816	887	1088	1095	892	755	760	725	1121	968	949	818	843	927	1255	1142	908	790	757	849	1085	924	972	853	855	872	1188	1210	871	788	796	767	1133	1158	812	822	764	805	1262	1206	915	1009	1159	1094
	1899-12-31 08:59:17	37.1	923	947	784	838	839	1123	1144	868	747	747	808	1105	957	956	837	846	905	1315	1232	933	775	779	794	1106	948	945	866	915	813	1221	1261	912	753	799	763	1193	1193	852	815	822	772	1252	1225	922	1006	1172	1180
	1899-12-31 09:09:17	37.1	944	928	815	802	829	1143	1141	903	780	751	729	1197	995	993	840	868	871	1363	1225	879	719	770	824	1116	972	1050	899	934	850	1297	1270	897	752	735	755	1217	1157	866	794	778	727	1320	1239	944	1018	1210	1160
	1899-12-31 09:19:17	37	985	963	816	834	868	1215	1176	827	815	722	738	1170	1014	1027	843	889	851	1394	1317	911	755	769	794	1173	973	983	876	938	854	1303	1303	895	800	763	796	1261	1196	832	826	760	752	1308	1314	882	1093	1201	1165
	1899-12-31 09:29:17	37	999	1106	789	822	839	1276	1264	893	748	730	758	1220	1004	1022	874	873	853	1447	1399	965	738	734	772	1203	1048	1052	905	947	835	1436	1309	877	789	799	793	1328	1296	837	803	757	790	1370	1395	940	1083	1355	1283
	1899-12-31 09:39:17	37	1000	1033	873	850	878	1300	1255	872	753	767	778	1315	1019	1125	890	864	910	1467	1411	939	755	769	781	1242	1062	1119	920	961	848	1452	1362	914	792	791	780	1372	1320	877	832	735	773	1428	1414	904	1117	1343	1357
	1899-12-31 09:49:17	37.1	1087	1103	877	862	847	1337	1282	913	794	714	797	1371	1072	1131	922	889	906	1553	1487	911	753	733	806	1304	1031	1151	922	1047	869	1505	1449	901	811	757	753	1502	1383	890	821	815	740	1556	1456	910	1095	1425	1393
	1899-12-31 09:59:17	37.1	1081	1079	858	881	881	1389	1357	884	760	738	769	1429	1104	1174	937	934	918	1571	1535	912	760	719	781	1385	1118	1145	912	1001	886	1552	1545	855	767	807	785	1490	1329	876	816	754	768	1590	1523	895	1137	1433	1398
	1899-12-31 10:09:17	37.1	1153	1159	870	905	901	1497	1405	898	771	739	789	1407	1142	1229	947	988	916	1631	1564	859	752	740	780	1442	1157	1170	993	1021	868	1608	1580	888	778	774	767	1542	1424	877	804	771	784	1645	1568	876	1174	1463	1453
	1899-12-31 10:19:17	37	1186	1203	843	921	834	1567	1492	865	752	753	749	1442	1131	1226	935	915	869	1642	1573	871	767	760	841	1447	1177	1247	983	1071	854	1753	1685	859	779	772	750	1678	1439	868	749	744	727	1767	1658	859	1205	1572	1528
	1899-12-31 10:29:17	37	1220	1233	917	958	873	1590	1594	880	797	738	721	1551	1214	1278	996	968	910	1770	1676	909	761	756	842	1538	1187	1337	970	1046	921	1753	1723	892	746	783	793	1701	1495	929	816	800	767	1812	1761	898	1180	1606	1619
	1899-12-31 10:39:17	37	1264	1288	929	956	852	1723	1648	869	773	728	778	1570	1340	1354	987	1042	916	1835	1699	878	704	716	779	1534	1310	1392	1062	1098	873	1878	1750	886	779	779	751	1743	1581	945	802	789	773	1978	1951	896	1240	1703	1722
	1899-12-31 10:49:17	37.1	1332	1381	945	969	857	1713	1772	878	808	728	778	1705	1381	1413	1017	1054	904	1876	1769	911	788	748	781	1620	1285	1488	1084	1127	891	1950	1930	872	801	763	834	1842	1611	932	769	800	791	2110	1969	892	1283	1835	1929
	1899-12-31 10:59:17	37	1349	1450	971	1027	869	1881	1826	898	762	719	752	1785	1401	1497	1042	1059	939	1917	1827	897	698	728	852	1685	1373	1520	1097	1103	896	2001	1990	888	751	765	773	1938	1671	947	774	796	741	2284	2158	909	1277	1991	2023
	1899-12-31 11:09:17	37	1462	1525	920	1048	851	1970	1930	878	790	760	782	1812	1491	1562	1108	1057	916	2058	1910	895	744	748	828	1766	1511	1675	1128	1179	918	2096	2053	942	793	752	756	2036	1764	975	803	782	788	2499	2336	911	1340	2076	2252
	1899-12-31 11:19:17	37	1474	1651	1042	1106	845	1987	2078	845	788	727	745	1813	1556	1689	1088	1054	890	2066	2071	870	759	710	825	1802	1551	1718	1178	1145	859	2139	2113	851	785	743	760	2102	1801	973	799	769	750	2542	2516	869	1328	2256	2262
	1899-12-31 11:29:17	37	1650	1772	1044	1060	921	2226	2145	870	741	731	760	2073	1662	1698	1185	1129	907	2312	2218	873	737	713	791	1923	1664	1903	1220	1221	880	2233	2110	856	753	744	791	2238	1894	992	799	802	778	2681	2614	900	1411	2501	2343
	1899-12-31 11:39:17	37	1732	1891	1075	1122	858	2349	2327	924	788	746	752	2141	1778	1826	1200	1112	911	2402	2277	881	766	742	812	2140	1814	1984	1264	1257	839	2251	2259	904	791	784	806	2453	1972	1002	820	782	776	2877	2735	954	1458	2640	2654
	1899-12-31 11:49:17	37	1803	2025	1141	1112	892	2477	2603	919	791	764	760	2312	1918	2094	1250	1188	905	2572	2429	939	754	793	841	2235	1921	2237	1397	1197	845	2451	2347	845	771	792	753	2526	2100	1045	800	758	828	2961	2873	893	1490	2840	2746
	1899-12-31 11:59:17	37.1	2006	2239	1164	1174	837	2680	2582	866	789	712	750	2380	2081	2135	1370	1192	907	2708	2567	930	731	745	830	2405	2015	2319	1411	1217	862	2643	2587	881	796	760	785	2726	2161	1036	801	759	764	3006	2951	930	1512	2893	2860
	1899-12-31 12:09:17	37.1	2093	2312	1234	1204	900	2857	2862	871	802	760	775	2629	2169	2360	1347	1210	895	2841	2667	906	749	735	821	2513	2177	2477	1527	1278	861	2847	2712	875	781	757	819	2840	2246	1066	802	801	764	3140	3087	941	1601	2999	3034
	1899-12-31 12:19:17	37.1	2359	2467	1300	1144	924	2936	2998	882	725	747	764	2736	2234	2519	1464	1237	967	2983	2847	882	780	742	836	2599	2325	2779	1563	1283	843	2986	2882	884	792	746	841	3009	2416	1039	815	770	763	3276	3279	918	1615	3088	3128
	1899-12-31 12:29:17	37	2454	2677	1407	1169	865	3101	3167	867	781	713	772	2888	2381	2776	1456	1180	898	3127	2934	907	779	678	806	2787	2589	3023	1655	1326	911	3126	2985	892	769	764	788	3252	2503	1104	804	759	750	3473	3454	906	1685	3228	3294
	1899-12-31 12:39:17	37	2683	2974	1417	1186	894	3353	3308	906	780	745	774	3110	2611	2987	1591	1233	904	3313	3237	868	753	751	809	3041	2672	3194	1724	1312	847	3285	3239	875	802	782	742	3494	2599	1097	764	747	804	3477	3463	925	1772	3417	3537
	1899-12-31 12:49:17	37	2940	3236	1586	1216	880	3462	3540	838	776	782	720	3514	2937	3274	1633	1188	918	3538	3392	895	757	771	800	3225	2899	3500	1826	1314	918	3427	3403	895	796	761	779	3747	2812	1168	810	749	763	3734	3672	887	1769	3571	3824
	1899-12-31 12:59:17	37	3246	3531	1649	1204	865	3707	3709	877	774	778	769	3657	3086	3525	1729	1285	927	3644	3416	842	744	758	783	3397	3240	3635	1852	1333	884	3689	3625	902	781	795	763	3855	2898	1189	824	740	766	3929	3930	924	1814	3730	3994
	1899-12-31 13:09:17	37.1	3303	3813	1617	1226	926	3722	3945	862	801	743	758	3912	3363	3762	1763	1270	925	3788	3621	914	734	753	798	3608	3461	3774	1873	1291	912	3922	3725	880	813	803	803	4216	3048	1212	817	791	796	4201	4058	914	1909	3912	4147
	1899-12-31 13:19:17	37.1	3773	4051	1715	1195	891	4179	4002	900	772	673	779	4019	3668	3927	1733	1251	900	4023	3788	942	764	730	815	3700	3766	3985	1879	1250	860	4023	3896	899	768	766	772	4501	3295	1241	799	745	758	4173	4271	909	1966	4074	4304
	1899-12-31 13:29:17	37	3951	4339	1720	1156	877	4186	4281	823	774	751	719	4346	3748	4088	1743	1298	919	4059	3931	881	727	741	784	3845	3964	4260	1825	1293	887	4035	3861	853	756	805	749	4706	3322	1270	792	764	762	4419	4650	917	2072	4072	4419
	1899-12-31 13:39:17	37	4211	4615	1774	1229	855	4324	4432	863	805	754	760	4504	4187	4515	1807	1284	927	4284	4041	950	711	764	795	4116	4269	4715	1924	1353	875	4189	4142	903	811	777	780	4944	3713	1347	791	755	767	4729	4814	939	2076	4422	4611
	1899-12-31 13:49:17	37	4637	4934	1791	1208	864	4593	4502	887	817	753	779	4750	4336	4801	1837	1282	938	4544	4306	902	739	725	813	4218	4577	4872	1925	1347	883	4333	4320	871	790	752	787	5331	3757	1422	788	772	750	4868	4747	890	2207	4746	4819
	1899-12-31 13:59:17	37	5122	5401	1698	1252	861	4866	4826	898	800	743	726	5051	4568	5048	1861	1328	932	4727	4631	894	778	738	780	4455	4803	5260	2027	1365	925	4602	4637	874	783	739	810	5440	3883	1429	799	765	751	5135	5069	878	2331	4916	4838
	1899-12-31 14:09:17	37	5338	5621	1825	1225	885	5037	4924	907	777	760	718	5377	4897	5424	1813	1315	892	4849	4621	935	784	731	810	4766	5004	5713	2008	1352	904	4830	4736	876	787	827	776	5677	4109	1500	750	796	797	5225	5115	903	2470	4957	5191
	1899-12-31 14:19:17	37.1	5653	5899	1761	1227	883	5259	5410	838	729	734	767	5654	5115	5617	1859	1254	920	5065	4902	896	775	762	820	4974	5526	5908	2000	1372	910	4970	4991	908	794	749	765	5944	4286	1557	787	765	772	5458	5450	908	2512	5116	5237
	1899-12-31 14:29:17	37.1	6053	6175	1801	1223	885	5438	5392	880	819	718	745	5776	5473	5624	1823	1283	889	5020	5016	890	727	745	805	5256	5698	6091	2013	1333	906	5301	5158	887	763	787	843	5994	4378	1594	748	769	759	5637	5528	863	2660	5291	5413
	1899-12-31 14:39:17	37	6339	6197	1882	1244	901	5788	5675	874	769	688	725	5967	5642	5910	1848	1321	987	5472	5235	917	742	744	823	5531	5963	6145	2022	1356	923	5541	5459	885	736	776	809	6313	4560	1570	802	787	756	5819	5616	950	2816	5435	5652
	1899-12-31 14:49:17	37	6885	6433	1840	1293	921	5890	5872	856	792	747	706	6413	6159	5938	1900	1304	923	5496	5285	877	747	719	826	5913	6382	6283	2032	1390	887	5872	5701	887	802	760	791	6598	4820	1684	837	775	723	6278	6067	911	2935	5637	5897
	1899-12-31 14:59:17	37	7358	6421	1846	1221	883	6291	6066	884	790	731	782	6556	6521	6137	1971	1275	877	5657	5627	901	721	728	812	6026	6932	6500	2083	1394	910	6068	6048	865	766	785	800	6911	5050	1731	811	790	769	6286	6133	960	3169	5861	5982
	1899-12-31 15:09:17	37.1	7790	6607	1872	1272	910	6512	6327	838	775	784	746	6902	6927	6196	1899	1279	1009	5898	5790	885	757	764	841	6451	7257	6593	2106	1348	919	6348	6195	891	801	758	797	7164	5332	1869	773	761	736	6440	6436	954	3221	6136	6153
	1899-12-31 15:19:17	37.1	8260	6627	1842	1264	869	6750	6669	863	776	739	735	7060	7195	6342	1915	1305	929	6073	5832	899	735	762	817	6844	7627	6661	2122	1417	885	6470	6434	902	775	789	758	7456	5610	1930	783	782	820	6986	6757	920	3398	6326	6379
	1899-12-31 15:29:17	37.1	8555	6541	1933	1240	911	7267	6877	922	783	782	760	7386	7734	6306	1985	1318	906	6235	6073	851	744	771	833	6987	7963	6603	2133	1397	894	6840	6814	904	779	770	788	7717	5882	2054	796	766	785	7073	6854	912	3446	6468	6676
	1899-12-31 15:39:17	37	8766	6581	1878	1224	920	7246	7051	831	755	743	754	7613	7693	6175	1941	1320	949	6446	6121	856	720	699	818	7199	8302	6687	2125	1374	890	6900	6651	891	730	761	798	8014	6164	2068	778	793	737	7134	6956	909	3548	6711	6811
	1899-12-31 15:49:17	37	9680	6706	1866	1266	887	7673	7237	852	797	770	768	7945	8382	6365	1978	1379	894	6741	6539	896	748	748	791	7614	8924	6906	2202	1360	921	7250	7174	915	790	758	766	8159	6644	2202	788	756	750	7353	7358	904	3705	6874	7180
	1899-12-31 15:59:17	37	9904	6828	1884	1291	909	7820	7634	889	765	724	739	8317	8926	6291	2017	1314	937	6995	6806	896	750	724	794	7994	9139	6865	2114	1369	958	7561	7385	909	767	745	791	8390	7190	2314	791	776	738	7841	7771	953	3818	7160	7329
	1899-12-31 16:09:17	37	10163	6904	1886	1306	910	8351	8053	857	762	750	737	8575	9056	6586	1977	1316	950	7398	6970	945	769	733	839	8249	9390	7036	2238	1375	939	7936	7729	887	782	778	759	8856	7425	2370	801	791	807	7897	7770	908	4046	7383	7611
	1899-12-31 16:19:17	37	10167	6905	1930	1289	903	8661	8390	885	779	695	760	9155	9289	6531	1951	1348	1009	7704	7238	887	735	750	788	8542	9729	7249	2223	1455	931	8161	7962	880	791	739	799	9204	7980	2425	773	799	764	8319	8155	952	4156	7726	7944
	1899-12-31 16:29:17	37.1	10441	7030	1894	1341	875	8944	8573	886	795	735	736	9353	9306	6675	1964	1369	909	8098	7633	897	742	814	840	8888	9831	7243	2255	1402	888	8320	8142	866	771	787	814	9676	8192	2536	797	790	725	8404	8560	945	4371	7849	8130
	1899-12-31 16:39:17	37.1	10761	7277	1961	1280	901	9187	9075	874	777	712	745	9781	9511	6681	2013	1351	979	8282	7597	891	763	703	809	9104	9858	7339	2233	1392	935	8810	8570	908	772	808	779	9754	8686	2607	789	768	741	8594	8588	905	4502	8155	8457
	1899-12-31 16:49:17	37	10910	7137	1951	1281	918	9405	9312	874	770	749	748	10168	9572	6728	1948	1366	959	8496	7922	870	761	714	803	9468	9973	7224	2263	1387	881	8906	8572	868	746	775	826	10067	8884	2786	830	766	766	8623	8676	910	4617	8440	8642
	1899-12-31 16:59:17	37	11048	7539	1933	1301	879	9905	9622	863	786	736	741	10303	9900	6890	1968	1304	928	8920	8328	905	734	747	808	9725	10328	7484	2307	1439	891	9088	9023	879	746	801	798	10449	9331	2815	795	810	801	8935	8996	943	4899	8593	8878
	1899-12-31 17:09:17	37	11429	7383	2010	1295	869	10146	10008	893	781	733	764	10928	10130	6967	1985	1296	928	9057	8720	917	743	732	831	10157	10303	7449	2280	1406	923	9564	9473	901	785	736	774	10927	9538	2942	804	766	800	9371	9348	876	5052	8907	9241
	1899-12-31 17:19:17	37	11499	7623	1914	1346	924	10644	10374	879	770	702	781	11355	10021	7204	2028	1384	910	9434	9037	846	734	734	838	10624	10455	7577	2296	1408	929	9948	9785	913	837	783	791	11280	9980	3025	802	808	767	9660	9875	941	5172	9194	9656
	1899-12-31 17:29:17	37.1	11773	7871	1990	1295	936	10780	10714	914	774	741	754	11692	10184	7093	2032	1362	941	9845	9396	907	764	713	805	10841	10601	7582	2338	1405	880	10178	9851	888	781	770	783	11544	10253	3018	802	808	809	9913	9864	942	5334	9508	9780
	1899-12-31 17:39:17	37.1	12145	8073	2038	1348	934	11329	11123	873	771	714	768	12221	10495	7160	2019	1385	942	10166	9578	899	732	713	812	11197	10728	7740	2390	1430	950	10202	10195	855	774	770	807	12115	10545	3144	842	792	758	10094	10340	929	5536	9674	10222
	1899-12-31 17:49:17	37	11967	7800	2018	1308	896	11543	11312	840	754	751	779	12468	10391	7079	1989	1370	958	10425	9967	903	797	712	832	11664	10761	7717	2412	1451	945	10618	10550	855	756	764	768	12139	10650	3283	805	802	750	10259	10315	897	5541	9980	10312
	1899-12-31 17:59:17	37	12078	8199	1956	1344	883	11988	11727	826	734	735	702	13043	10487	7091	2029	1346	962	10445	10052	908	734	768	814	11945	10840	7826	2440	1507	929	10845	11029	898	806	785	824	12614	10979	3355	799	761	771	10579	10619	951	5663	10249	10377
	1899-12-31 18:09:17	37	12774	8270	1975	1355	903	12349	11844	909	753	766	773	13561	10826	7347	2038	1397	935	10876	10325	884	723	746	841	12451	11079	7907	2425	1445	897	11110	11051	878	787	830	834	13078	11317	3694	816	776	757	11075	11001	947	6146	10479	11001
	1899-12-31 18:19:17	37	12698	8399	1940	1319	884	12758	12443	863	777	701	760	13898	11025	7367	2068	1428	943	11357	10625	897	748	736	815	12749	11008	8050	2376	1423	944	11603	11347	860	811	739	819	13462	11531	3760	797	792	791	11208	11194	938	6328	10799	11152
	1899-12-31 18:29:17	37.1	12601	8579	2054	1365	934	13138	12811	888	766	687	782	14292	11146	7553	2046	1404	921	11528	10978	867	759	760	844	13304	11262	8102	2424	1523	946	11896	11668	861	757	765	830	13625	11846	3911	829	781	777	11255	11455	941	6480	11094	11404
	1899-12-31 18:39:17	37.1	12873	8810	1921	1378	910	13814	13435	848	800	751	767	14701	11103	7402	2120	1363	924	11660	11318	867	751	721	769	13600	11254	8261	2505	1449	918	12373	12074	905	779	766	747	13866	12033	3930	798	775	727	11722	11699	905	6750	11183	11619
	1899-12-31 18:49:17	37.1	12970	8939	2058	1382	890	13797	13690	880	762	738	741	15331	11282	7486	2143	1384	952	12105	11606	916	772	755	846	13860	11492	8260	2521	1511	942	12508	12272	860	766	816	798	14653	12078	3990	802	808	793	11898	12004	942	6876	11667	11884
	1899-12-31 18:59:17	37	12931	8905	2033	1361	938	14187	13746	815	805	729	731	15569	11212	7455	2014	1363	922	12142	11553	862	733	698	831	14160	11333	8200	2472	1443	905	12430	12456	895	805	789	747	14958	12187	4050	803	821	796	12097	12007	892	7039	11612	11975
	1899-12-31 19:09:17	37	13208	9224	2004	1346	948	14708	14457	890	757	725	769	15840	11463	7551	2125	1390	949	12490	12005	857	721	750	777	14947	11513	8400	2501	1488	944	12748	12709	916	785	755	825	15373	12365	4217	854	783	784	12431	12451	922	7228	11968	12332
	1899-12-31 19:19:17	37	13336	9235	2075	1311	909	15200	14715	876	778	730	776	16489	11521	7712	2017	1425	978	12879	12275	912	707	724	802	15525	11394	8166	2523	1533	952	13314	13190	866	781	780	818	15713	12797	4391	823	763	788	12691	12489	912	7478	12528	12800
	1899-12-31 19:29:17	37	13408	9251	2173	1358	910	15423	15164	866	769	743	763	16913	11647	7695	2078	1415	952	13328	12488	878	733	737	811	15654	11753	8124	2545	1527	910	13582	13383	856	756	760	799	16334	12923	4573	790	788	810	12888	12981	931	7606	12687	12988
	1899-12-31 19:39:17	37.1	13536	9305	2134	1387	935	15834	15648	884	733	733	783	17340	11726	7701	2162	1365	965	13445	12738	884	747	706	777	15963	11579	8205	2602	1501	980	13889	13652	908	801	769	829	16813	13230	4607	825	753	784	13115	13156	937	7866	12893	13180
	1899-12-31 19:49:17	37	13463	9311	2110	1383	908	16397	15952	879	741	730	765	17929	11928	7773	2107	1411	963	13758	12990	916	720	756	835	16577	11852	8155	2564	1509	957	13965	14025	895	805	773	787	16864	13400	4869	800	791	817	13236	13158	934	8030	13033	13647
	1899-12-31 19:59:17	37	13446	9444	2151	1334	928	16428	16049	867	772	731	768	18269	11923	7772	2095	1374	935	13781	13271	876	755	726	885	16547	11764	8197	2581	1502	953	14081	13988	863	771	796	814	17030	13388	4852	772	793	782	13399	13369	911	8176	13189	13623
	1899-12-31 20:09:17	37	13659	9535	2112	1331	880	16931	16493	904	753	724	783	18745	11778	7770	2107	1387	957	13987	13351	856	734	703	814	17083	11970	8233	2689	1465	948	14433	14337	882	789	776	815	17335	13404	5024	767	778	742	13729	13781	910	8379	13377	13569
	1899-12-31 20:19:17	37	13644	9713	2159	1372	915	17106	16856	844	763	736	767	19411	12014	7797	2133	1402	978	14697	13926	911	743	708	833	17618	11982	8102	2643	1500	961	14993	14600	894	809	782	828	18057	13455	5195	825	820	737	13972	13909	944	8570	13627	14065
	1899-12-31 20:29:17	37	14037	9668	2205	1401	892	17589	17435	830	729	710	740	19717	12222	7853	2150	1388	978	14679	13823	884	731	740	801	18045	12298	8364	2654	1511	988	14758	15201	864	803	788	769	18312	13790	5258	799	785	778	14152	14100	946	9020	13851	14364
	1899-12-31 20:39:17	37.1	14045	9699	2190	1444	927	17845	17804	859	758	709	729	20491	12252	7951	2087	1465	944	15086	14487	867	775	731	797	18569	12367	8354	2696	1566	936	15378	15384	875	792	749	823	18803	13900	5435	800	779	800	14496	14512	901	9072	14131	14805
	1899-12-31 20:49:17	37	14063	9725	2162	1377	939	18402	18129	872	747	722	767	20953	12397	7999	2168	1397	992	15395	14609	879	708	712	832	18929	12416	8442	2714	1490	929	15515	15700	849	768	772	788	18932	14138	5583	799	807	721	14743	14466	963	9411	14243	14765
	1899-12-31 20:59:17	37.1	14362	9743	2224	1378	909	18771	18626	828	779	694	770	21090	12509	7928	2140	1399	1007	15566	14782	871	745	735	788	19289	12383	8254	2694	1507	939	15711	15850	880	793	783	768	19418	13925	5595	777	787	780	14911	14787	963	9586	14477	15091
	1899-12-31 21:09:17	37	14343	9892	2215	1381	923	19064	18703	872	769	726	741	21288	12192	7968	2188	1406	966	15524	15169	841	765	719	811	19576	12475	8373	2650	1550	992	15911	15722	871	753	765	782	19711	14013	5655	786	769	739	14986	14728	941	9934	14454	15135
	1899-12-31 21:19:17	37	14416	9845	2335	1398	908	19567	19155	895	765	703	765	22331	12510	8103	2111	1436	1015	15929	15302	891	747	736	809	20261	12731	8490	2667	1528	966	16159	16506	893	817	800	773	19754	14476	5715	839	764	809	15170	15290	929	9935	14960	15496
	1899-12-31 21:29:17	37	14557	9903	2261	1391	908	19824	19629	892	760	727	749	22494	12936	8054	2173	1434	960	16230	15541	910	752	705	828	20632	13108	8509	2763	1576	940	16498	16531	887	803	781	777	20335	14690	5840	796	805	732	15244	15289	942	9950	15005	15718
	1899-12-31 21:39:17	37	14873	9971	2394	1397	963	20092	20022	890	778	708	783	22715	12955	8191	2143	1394	1025	16439	15926	897	736	763	818	21077	13137	8529	2732	1516	974	16851	16555	897	733	800	780	20755	14721	6129	809	775	736	16029	15483	990	10532	15543	16172
	1899-12-31 21:49:17	37	14818	9983	2370	1435	982	20787	20705	908	746	706	790	23251	12897	8327	2169	1466	958	16610	16144	866	728	725	791	21599	13109	8593	2825	1539	979	17031	17246	854	756	784	765	20997	15049	6185	826	770	790	15776	15994	963	10513	15710	16166
	1899-12-31 21:59:17	37.1	14844	9963	2332	1424	968	20758	20868	873	783	718	756	23780	13014	8470	2206	1420	980	16705	16316	888	732	765	860	22214	13255	8428	2752	1568	969	17256	17467	865	769	759	839	21617	15104	6093	812	763	800	15908	16093	975	10791	15978	16466
	1899-12-31 22:09:17	37	14869	9901	2332	1390	957	20907	21204	864	740	717	735	24080	12788	8282	2128	1385	975	16773	16648	831	735	737	768	22079	12783	8526	2690	1527	933	17024	17182	865	758	755	832	21729	14509	5998	789	764	765	15766	15806	938	10682	15697	16168
	1899-12-31 22:19:17	37	15176	9981	2378	1385	984	21667	21305	873	745	699	778	24027	13054	8330	2150	1396	989	17046	16560	887	747	720	821	22675	13313	8695	2794	1543	955	17844	17660	921	764	815	780	21971	14094	6274	799	826	796	16101	16553	974	10976	15827	16507
	1899-12-31 22:29:17	37	15285	10092	2411	1455	945	22018	21895	862	758	706	769	24475	13298	8378	2147	1396	1015	17552	16944	843	704	689	838	22775	13435	8805	2821	1560	956	17678	17852	920	813	739	758	22540	14043	6365	824	811	775	16458	16609	976	11399	16326	17067
	1899-12-31 22:39:17	37	15329	10193	2418	1367	936	22226	21999	897	789	686	767	25240	13396	8376	2176	1444	999	17730	17545	877	760	741	826	23483	13866	8894	2926	1609	961	18107	17888	852	804	795	804	22843	14285	6288	780	812	769	16690	16902	983	11636	16493	17266
	1899-12-31 22:49:17	37.1	15320	10323	2430	1429	972	22901	22695	846	753	729	775	25621	13548	8517	2203	1416	983	18047	17727	897	740	734	820	23668	13706	8823	2848	1580	1016	18391	18422	902	783	771	809	23345	14078	6434	818	786	776	17003	17238	995	11864	16397	17446
	1899-12-31 22:59:17	37.1	15401	10226	2498	1456	948	23089	22970	891	796	705	734	25878	13529	8540	2212	1434	1048	18311	17757	872	772	745	831	24346	13889	8963	2826	1540	990	18381	18532	868	765	787	788	23251	14366	6519	804	782	728	17242	17310	963	11755	16978	17590
	1899-12-31 23:09:17	37	15352	10062	2432	1419	945	22934	22815	821	717	699	731	26051	13597	8606	2178	1373	961	18381	17832	862	749	686	796	24445	13946	8832	2802	1582	1031	18509	18707	863	782	796	791	23607	14148	6458	771	791	784	17174	17139	951	11924	17167	17678
	1899-12-31 23:19:17	37	15593	10202	2414	1415	975	23440	23234	841	760	718	776	26522	13540	8817	2184	1413	1005	18472	18254	864	686	709	792	24603	13778	8879	2856	1546	985	18867	18995	889	775	800	834	24093	14349	6626	810	789	815	17431	17431	970	12214	17274	18086
	1899-12-31
	1899-12-31
	1899-12-31
	1899-12-31
	1899-12-31
	1899-12-31
	1899-12-31
	1899-12-31
	1899-12-31
	1899-12-31
	1899-12-31
	1899-12-31
	1899-12-31
	1899-12-31
	1899-12-31
	1899-12-31
	1899-12-31
	1899-12-31
	1899-12-31
	1899-12-31
	1899-12-31
	1899-12-31
	1899-12-31
	1899-12-31
	1899-12-31
	1899-12-31
	1899-12-31
	1899-12-31
	1899-12-31
	1899-12-31
	1899-12-31
	1899-12-31
	1899-12-31
	1899-12-31
	1899-12-31
	1899-12-31
	1899-12-31
	1899-12-31
	1899-12-31
	1899-12-31
	1899-12-31
	1899-12-31
	1899-12-31
	1899-12-31
	1899-12-31
	1899-12-31
	1899-12-31
	1899-12-31
	1899-12-31
	1899-12-31
	1899-12-31
	1899-12-31
	1899-12-31
	1899-12-31
	1899-12-31
	1899-12-31
	1899-12-31
	1899-12-31
	1899-12-31
	1899-12-31
	1899-12-31
	1899-12-31
	1899-12-31
	1899-12-31
	1899-12-31
	1899-12-31
	1899-12-31
	1899-12-31
	1899-12-31
	1899-12-31
	1899-12-31
	1899-12-31
[truncated: 3,296 more rows]
[truncated: 49 more columns]

## Sheet: Sheet2
	1	2	3	4	5	6	7	8	9	10	11	12
	gal					gly	gly	DOG				gly
	0.1%	0.05%	0.01%	0.05%	0.01%	6	7	0.1%	0.01%	0.001%	0.0001%	12
H5r													Bitmap [Read 3:425,475]
H5r													Bitmap [Read 3:425,475]
H5r													Bitmap [Read 3:425,475]
H5r-dgalP													Bitmap [Read 3:425,475]
H5r-dgalP													Bitmap [Read 3:425,475]
H5r-dgalP													Bitmap [Read 3:425,475]
IT028													Bitmap [Read 3:425,475]
IT028													Bitmap [Read 3:425,475]
													IN 0.1% DOG THE ANCESTOR GROWS A BIT FASTER THAN THE CONSTITUTIVE GALP-
