# Supplementary material for: Adaptation dynamics between copy-number and point mutations
Source: eLife journal article supplement (doi:10.7554/elife.82240), 2022-12-22
Supplement: supp [file EE24.12_export_raw_data.xlsx]

## Sheet: Plate 1 - mediumC_deltaC
Software Version	2001-09-02
Experiment File Path:	C:\Users\Public\Documents\Experiments\Bella\20190512_EE24.12.xpt
Protocol File Path:	C:\Users\Public\Documents\Protocols\Bella\EE22.prt
Plate Number	Plate 1
Date	2019-05-01
Time	10:16:15
Reader Type:	Synergy H1
Reader Serial Number:	266878
Reading Type	Reader
Procedure Details
Plate Type	Nunc 96 flat bottom generic
Discontinuous Kinetics	Runtime 22:00:00 (D:HH:MM), Interval 1:00:00, 23 Reads
	Pause after each run
Eject plate on completion
Shake	Double Orbital: 0:10 (MM:SS)
	Frequency: 365 cpm (2 mm)
Read	Absorbance Endpoint
	Full Plate
	Wavelengths: 600
	Read Speed: Sweep, Delay: 0 msec, Measurements/Data Point: 1
Shake	Linear: 0:02 (MM:SS)
	Frequency: 731 cpm (2 mm)
Read	Fluorescence Endpoint
	Full Plate
	Filter Set 1
	Excitation: 515, Emission: 545
	Optics: Top, Gain: 100
	Filter Set 2
	Excitation: 515, Emission: 545
	Optics: Top, Gain: 120
	Light Source: Xenon Flash, Lamp Energy: High
	Read Speed: Sweep, Delay: 0 msec, Measurements/Data Point: 1
	Read Height: 7 mm
Shake	Linear: 0:02 (MM:SS)
	Frequency: 731 cpm (2 mm)
Read	Fluorescence Endpoint
	Full Plate
	Filter Set 1
	Excitation: 425, Emission: 475
	Optics: Top, Gain: 100
	Filter Set 2
	Excitation: 425, Emission: 475
	Optics: Top, Gain: 60
	Light Source: Xenon Flash, Lamp Energy: High
	Read Speed: Sweep, Delay: 0 msec, Measurements/Data Point: 1
	Read Height: 7 mm
Layout
		1	2	3	4	5	6	7	8	9	10	11	12
	A	SPL1	SPL5	SPL9	SPL13	SPL17	SPL21	SPL25	SPL29	SPL33	SPL37	SPL44	SPL51	Well ID
	B	SPL2	SPL6	SPL10	SPL14	SPL18	SPL22	SPL26	SPL30	SPL34	SPL38	SPL45	SPL52	Well ID
	C	SPL3	SPL7	SPL11	SPL15	SPL19	SPL23	SPL27	SPL31	SPL35	SPL39	SPL46	SPL53	Well ID
	D	SPL4	SPL8	SPL12	SPL16	SPL20	BLK	BLK	SPL32	SPL36	SPL40	SPL47	SPL54	Well ID
	E	SPL58	SPL62	SPL66	SPL70	SPL74	SPL78	SPL82	SPL86	SPL90	SPL41	SPL48	SPL55	Well ID
	F	SPL59	SPL63	SPL67	SPL71	SPL75	SPL79	SPL83	SPL87	SPL91	SPL42	SPL49	SPL56	Well ID
	G	SPL60	SPL64	SPL68	SPL72	SPL76	SPL80	SPL84	SPL88	SPL92	SPL43	SPL50	SPL57	Well ID
	H	SPL61	SPL65	SPL69	SPL73	SPL77	BLK	BLK	SPL89	SPL93	SPL94	SPL95	SPL1	Well ID
Read 1:600
	Time	T° Read 1:600	A1	A2	A3	A4	A5	A6	A7	A8	A9	A10	A11	A12	B1	B2	B3	B4	B5	B6	B7	B8	B9	B10	B11	B12	C1	C2	C3	C4	C5	C6	C7	C8	C9	C10	C11	C12	D1	D2	D3	D4	D5	D6	D7	D8	D9	D10	D11
	00:00:11	36.6	0.155	0.151	0.15	0.196	0.17	0.202	0.241	0.215	0.249	0.194	0.256	0.257	0.167	0.19	0.239	0.19	0.199	0.246	0.219	0.257	0.284	0.235	0.282	0.268	0.224	0.237	0.244	0.287	0.292	0.308	0.322	0.358	0.339	0.325	0.28	0.287	0.186	0.259	0.24	0.267	0.319	0.325	0.32	0.344	0.355	0.326	0.278
	23:46:30	26.9	0.197	0.206	0.146	0.136	0.137	0.192	0.134	0.123	0.127	0.13	0.129	0.127	0.223	0.167	0.149	0.154	0.111	0.171	0.183	0.148	0.116	0.145	0.132	0.139	0.234	0.192	0.19	0.174	0.217	0.162	0.206	0.203	0.167	0.173	0.166	0.157	0.233	0.204	0.176	0.258	0.195	0.196	0.197	0.22	0.207	0.203	0.139
	1 day, 23:40:57	36.8	0.144	0.141	0.137	0.148	0.137	0.161	0.208	0.153	0.135	0.132	0.171	0.159	0.126	0.144	0.176	0.147	0.137	0.147	0.145	0.166	0.203	0.184	0.213	0.201	0.154	0.188	0.196	0.169	0.193	0.158	0.158	0.124	0.203	0.203	0.158	0.187	0.139	0.181	0.164	0.141	0.132	0.191	0.194	0.142	0.124	0.187	0.143
	3 days, 0:00:03	26.9	0.163	0.141	0.129	0.106	0.11	0.119	0.125	0.163	0.134	0.139	0.155	0.129	0.179	0.163	0.116	0.105	0.095	0.103	0.127	0.104	0.142	0.132	0.176	0.145	0.21	0.165	0.121	0.114	0.12	0.106	0.137	0.105	0.112	0.116	0.166	0.132	0.195	0.16	0.111	0.107	0.109	0.115	0.117	0.114	0.113	0.11	0.103
	3 days, 23:50:06	26.6	0.106	0.127	0.104	0.122	0.107	0.105	0.107	0.106	0.095	0.108	0.098	0.101	0.122	0.106	0.104	0.096	0.099	0.097	0.104	0.099	0.105	0.098	0.118	0.101	0.145	0.104	0.11	0.1	0.097	0.095	0.146	0.105	0.105	0.104	0.105	0.094	0.142	0.112	0.118	0.098	0.102	0.098	0.102	0.106	0.103	0.103	0.103
	4 days, 23:54:15	26.7	0.1	0.122	0.1	0.122	0.102	0.101	0.102	0.103	0.099	0.109	0.098	0.102	0.1	0.098	0.096	0.097	0.1	0.098	0.106	0.102	0.104	0.097	0.115	0.095	0.106	0.104	0.106	0.1	0.104	0.095	0.107	0.107	0.105	0.102	0.095	0.099	0.102	0.102	0.1	0.103	0.102	0.103	0.104	0.108	0.099	0.097	0.1
	5 days, 23:55:58	26.7	0.2	0.166	0.169	0.195	0.238	0.241	0.184	0.236	0.198	0.265	0.232	0.223	0.146	0.198	0.176	0.181	0.19	0.187	0.192	0.182	0.186	0.193	0.19	0.199	0.167	0.128	0.138	0.164	0.184	0.174	0.177	0.172	0.197	0.195	0.2	0.243	0.178	0.106	0.188	0.231	0.212	0.217	0.203	0.216	0.204	0.187	0.2
	7 days, 0:06:31	26.8	0.096	0.094	0.083	0.091	0.079	0.077	0.076	0.078	0.077	0.103	0.085	0.125	0.099	0.106	0.103	0.099	0.104	0.107	0.11	0.101	0.118	0.103	0.134	0.117	0.106	0.116	0.109	0.105	0.103	0.105	0.123	0.1	0.109	0.138	0.105	0.111	0.096	0.109	0.099	0.107	0.099	0.099	0.096	0.095	0.094	0.103	0.146
	8 days, 0:07:25	26.6	0.116	0.146	0.128	0.133	0.119	0.095	0.103	0.097	0.1	0.092	0.084	0.108	0.189	0.124	0.125	0.105	0.094	0.094	0.094	0.1	0.116	0.092	0.095	0.118	0.129	0.162	0.148	0.094	0.096	0.09	0.106	0.116	0.095	0.105	0.088	0.094	0.265	0.124	0.137	0.096	0.099	0.094	0.13	0.102	0.074	0.1	0.118
	8 days, 23:20:56	27.1	0.092	0.122	0.096	0.12	0.104	0.098	0.097	0.096	0.098	0.105	0.098	0.093	0.101	0.111	0.099	0.112	0.104	0.111	0.121	0.143	0.135	0.105	0.118	0.122	0.105	0.134	0.111	0.095	0.107	0.105	0.13	0.111	0.102	0.174	0.1	0.098	0.107	0.1	0.105	0.103	0.104	0.103	0.097	0.098	0.094	0.101	0.128
	10 days, 0:04:22	26.8	0.113	0.143	0.107	0.115	0.109	0.105	0.101	0.103	0.103	0.099	0.102	0.115	0.115	0.118	0.11	0.119	0.109	0.122	0.114	0.145	0.121	0.11	0.097	0.136	0.111	0.145	0.119	0.098	0.118	0.095	0.124	0.119	0.101	0.125	0.108	0.104	0.109	0.108	0.107	0.114	0.124	0.125	0.107	0.117	0.111	0.117	0.125
	10 days, 23:54:58	26.8	0.208	0.322	0.203	0.246	0.155	0.198	0.166	0.161	0.139	0.219	0.147	0.149	0.205	0.231	0.25	0.204	0.18	0.168	0.248	0.189	0.185	0.162	0.168	0.143	0.285	0.291	0.272	0.273	0.22	0.198	0.299	0.185	0.146	0.227	0.183	0.114	0.25	0.264	0.242	0.213	0.197	0.208	0.176	0.14	0.145	0.169	0.154
	00:00:00
	00:00:00
	00:00:00
	00:00:00
	00:00:00
	00:00:00
	00:00:00
	00:00:00
	00:00:00
	00:00:00
	00:00:00
Read 2:515,545
	Time	T° Read 2:515,545	A1	A2	A3	A4	A5	A6	A7	A8	A9	A10	A11	A12	B1	B2	B3	B4	B5	B6	B7	B8	B9	B10	B11	B12	C1	C2	C3	C4	C5	C6	C7	C8	C9	C10	C11	C12	D1	D2	D3	D4	D5	D6	D7	D8	D9	D10	D11
	00:00:03	36.5	290	185	132	267	191	196	225	273	218	241	249	265	302	285	239	170	174	166	272	220	251	307	295	259	230	148	258	212	194	207	286	283	165	315	233	277	169	257	225	271	172	262	269	253	289	234	356
	23:46:23	26.9	182	174	187	170	178	244	206	242	194	273	230	179	272	244	221	263	307	230	245	297	245	309	199	204	110	222	250	270	180	232	261	243	192	101	235	200	272	311	244	236	147	205	178	166	143	230	176
	1 day, 23:40:49	36.7	142	284	199	285	205	178	183	254	218	205	193	266	260	145	178	145	173	241	173	248	161	191	184	266	215	274	196	235	176	114	290	257	192	268	195	207	114	279	167	143	183	174	201	173	188	190	176
	2 days, 23:59:55	26.9	178	263	162	174	200	227	195	265	159	324	255	183	247	173	222	210	185	188	255	195	119	249	271	271	171	114	272	244	251	143	279	175	175	202	167	196	148	268	201	193	200	200	231	191	197	160	173
	3 days, 23:49:59	26.6	179	259	224	213	265	213	276	170	146	271	196	254	164	200	169	244	135	213	235	268	163	235	246	164	165	231	328	274	149	212	210	224	338	186	306	229	311	275	162	236	202	178	183	217	180	199	158
	4 days, 23:54:08	26.7	288	317	274	191	188	179	221	307	238	187	158	159	209	194	226	137	212	202	210	161	244	246	230	200	337	241	262	194	222	190	274	164	217	199	221	251	205	129	294	278	234	252	366	182	297	196	331
	5 days, 23:55:50	26.7	228	195	195	275	283	211	141	285	243	392	202	280	214	218	286	96	241	195	371	216	318	181	248	268	253	249	267	230	271	318	291	212	210	304	203	304	279	208	250	269	228	192	252	170	167	208	229
	7 days, 0:06:23	26.8	247	312	171	173	225	184	244	222	113	248	138	232	259	224	235	230	234	247	415	189	240	220	205	169	256	307	204	280	270	217	211	291	186	359	270	172	198	140	278	143	236	262	240	294	201	296	272
	8 days, 0:07:17	26.7	180	244	266	269	197	159	174	201	230	267	204	302	298	223	151	193	220	233	289	236	306	209	375	195	224	251	269	270	194	213	241	208	198	358	200	253	234	158	223	196	218	268	189	221	229	204	287
	8 days, 23:20:48	27.1	183	266	263	281	201	204	178	179	198	257	259	262	205	158	245	201	226	231	223	239	230	230	264	256	191	270	190	183	195	196	273	160	218	330	185	228	182	227	189	210	260	219	135	199	240	213	245
	10 days, 0:04:14	26.8	103	348	270	258	190	265	158	226	236	264	238	167	308	181	216	223	232	238	327	198	201	140	233	252	188	267	193	258	151	266	202	206	226	338	219	309	146	233	194	220	175	152	223	235	231	222	236
	10 days, 23:54:50	26.8	241	284	258	232	223	237	244	211	345	281	238	273	297	166	305	183	260	226	398	265	213	152	246	368	283	257	191	199	287	171	354	244	208	201	279	258	179	231	265	237	250	264	257	268	351	263	259
	00:00:00
	00:00:00
	00:00:00
	00:00:00
	00:00:00
	00:00:00
	00:00:00
	00:00:00
	00:00:00
	00:00:00
	00:00:00
Read 2:515,545[2]
	Time	T° Read 2:515,545[2]	A1	A2	A3	A4	A5	A6	A7	A8	A9	A10	A11	A12	B1	B2	B3	B4	B5	B6	B7	B8	B9	B10	B11	B12	C1	C2	C3	C4	C5	C6	C7	C8	C9	C10	C11	C12	D1	D2	D3	D4	D5	D6	D7	D8	D9	D10	D11
	00:00:15	36.5	1172	1139	839	946	1040	1051	1138	926	945	967	1024	1038	925	691	936	884	868	1339	1102	872	1115	951	892	973	879	972	899	1039	1040	849	899	1179	770	874	1025	1221	813	872	930	795	1197	985	1064	863	1019	919	1331
	23:46:35	26.9	1170	717	811	855	997	845	753	1081	1351	850	784	754	1237	728	785	813	962	1083	836	661	596	1037	893	821	1022	843	1296	1128	1192	1120	717	836	764	794	828	909	880	1045	810	807	1146	794	1107	828	988	739	697
	1 day, 23:41:01	36.7	606	853	604	1042	936	766	923	853	1107	850	831	1106	572	947	821	764	816	832	881	795	1181	1072	702	845	747	1035	994	630	801	576	1101	710	957	946	766	679	899	751	1041	885	835	768	714	842	800	980	825
	3 days, 0:00:07	26.9	642	802	836	645	804	772	882	739	946	1144	804	754	795	698	960	738	519	614	1048	649	1051	722	534	894	797	986	761	1151	511	688	827	662	987	888	852	765	769	853	576	619	760	937	671	964	608	894	944
	3 days, 23:50:11	26.6	1007	1304	841	1075	714	901	763	836	1000	1137	1118	781	913	814	705	873	958	833	901	695	721	736	1108	882	891	971	879	892	1020	663	917	1013	920	1127	529	783	803	943	781	823	639	948	631	930	830	869	977
	4 days, 23:54:20	26.7	883	1028	980	862	873	1049	937	868	855	1244	1032	904	987	1005	785	860	808	1056	1062	852	1110	820	967	956	833	916	1029	894	869	966	1223	963	948	815	796	941	893	1064	710	1134	1054	885	925	819	649	765	986
	5 days, 23:56:02	26.7	887	1174	732	786	1065	768	923	997	1063	1801	970	960	782	799	1042	973	1244	796	1228	1028	1000	740	1084	813	1154	1025	923	701	1053	1035	1118	1034	992	950	1003	911	993	804	1032	1095	1071	1145	838	677	934	696	836
	7 days, 0:06:35	26.8	1011	955	850	807	599	895	677	472	769	1152	894	855	736	771	799	1134	1108	878	1179	1099	887	801	1157	981	1036	1004	829	888	972	898	1355	836	1154	1178	976	1028	1190	941	947	983	1075	987	1069	1087	1053	888	1193
	8 days, 0:07:29	26.7	783	1129	705	1232	1197	1038	809	696	730	1188	801	1042	1044	1374	993	782	974	1084	1138	1071	1237	868	1162	1363	721	1467	930	740	973	968	1147	761	1097	850	1140	1205	1079	834	1010	933	725	926	856	706	718	922	969
	8 days, 23:21:00	27.1	1044	744	746	896	1017	923	652	934	905	1071	696	793	898	886	720	851	921	1170	1210	862	985	1029	1205	906	604	1093	566	936	1090	763	912	786	838	1108	1060	1015	668	957	893	812	595	823	826	983	1067	719	738
	10 days, 0:04:26	26.8	864	993	549	1104	1111	1043	716	948	591	695	790	773	998	662	466	858	1110	903	1406	914	1004	840	1478	841	825	930	778	752	875	1207	901	957	1004	1116	1001	645	784	816	906	832	788	955	984	886	992	766	1103
	10 days, 23:55:02	26.8	1171	1477	916	1217	1030	736	998	823	1067	1163	1153	591	1014	956	1195	797	901	1409	1161	967	1144	577	1323	1160	853	960	614	693	1127	1484	1126	744	1130	905	1149	821	815	1152	617	855	688	919	1237	844	809	867	872
	00:00:00
	00:00:00
	00:00:00
	00:00:00
	00:00:00
	00:00:00
	00:00:00
	00:00:00
	00:00:00
	00:00:00
	00:00:00
Read 3:425,475
	Time	T° Read 3:425,475	A1	A2	A3	A4	A5	A6	A7	A8	A9	A10	A11	A12	B1	B2	B3	B4	B5	B6	B7	B8	B9	B10	B11	B12	C1	C2	C3	C4	C5	C6	C7	C8	C9	C10	C11	C12	D1	D2	D3	D4	D5	D6	D7	D8	D9	D10	D11
	00:00:03	36.3	9160	10697	8786	10146	11322	10881	12600	12294	12399	11238	12580	12593	10838	11120	10936	12128	10695	9831	10973	11948	13108	13677	12542	12117	12190	12816	13219	11963	13157	12958	13140	14773	17581	16534	11890	13134	11049	14104	11131	12977	13590	11746	13689	13246	14822	11725	11891
	23:46:23	26.9	8508	9073	6951	7230	7458	7221	7159	7210	6288	6072	6028	5928	9410	7929	8323	6883	6623	7477	8511	7733	6512	7412	6589	6996	9346	8868	8632	8639	8841	7916	7483	8155	7589	7003	6826	6685	8857	8959	9313	8046	7737	6542	7925	6225	7109	6090	5970
	1 day, 23:40:49	36.6	8112	8676	7871	7449	7815	8820	8221	8704	8507	8769	9347	9166	8038	7959	7958	7874	7906	7771	8219	8153	8877	9126	9073	8912	8680	7761	7249	7318	7813	7640	8324	7182	7966	8963	8893	9626	7582	8182	7609	7015	7620	7203	7364	7660	7321	8386	7597
	2 days, 23:59:55	26.9	8523	8684	7321	7721	7809	8535	8347	8508	8436	8427	8947	7799	9225	7465	7409	7761	7595	7549	7416	7684	8115	7509	9049	7923	9438	8408	7908	7377	8009	7742	10028	7669	7387	8474	7724	7513	9440	8172	7666	7672	7534	7695	7532	7469	7535	7696	6999
	3 days, 23:49:59	26.6	6741	7185	6326	7723	7243	7128	6726	6685	6991	7637	7146	7414	6935	6297	6653	6392	7117	6763	6959	7000	6777	6707	8149	7359	6594	6501	6548	6335	6587	6713	9325	7134	6842	6895	6291	7322	6620	6466	6847	6841	6820	6488	7329	7294	7439	7216	7415
	4 days, 23:54:07	26.7	6419	7906	6637	8337	6831	6894	7291	7318	6669	8240	6732	7512	6172	6284	6795	6898	6509	6741	6971	6488	7212	6884	8150	6679	6447	6924	6397	6961	6197	6419	7439	7031	6864	6552	6173	6747	6379	6576	6127	6904	6381	6291	6739	6764	6521	6738	6542
	5 days, 23:55:50	26.7	8849	10172	7730	9366	8393	9032	8419	8963	9053	12638	9896	9829	8375	8035	8114	8027	8372	8248	9962	8228	8238	7997	9583	8923	8329	9369	8725	8526	8276	8224	9464	8204	8070	9205	7949	9739	8593	8339	8178	8077	7821	8479	7736	8171	8393	8347	9066
	7 days, 0:06:23	26.8	4694	5486	4472	5649	4455	4285	4307	4459	3965	5775	4327	3998	6350	6349	6021	6191	5735	6485	7993	6344	7187	6147	9193	6721	6340	6695	6397	6334	6170	6227	8410	5657	5935	7970	6075	6973	6609	6569	5864	5824	5554	5981	6576	6457	6250	5661	8330
	8 days, 0:07:17	26.7	6814	8890	7326	9655	7875	7036	6978	7057	6773	7972	6924	7456	8198	8619	7946	7750	7032	8202	9248	8389	8299	7710	9350	10313	8118	9529	7743	7001	7000	7284	8991	7557	7304	8596	7714	9426	9186	8208	7877	7372	6902	7662	7401	8289	8839	7591	9754
	8 days, 23:20:48	27.1	7259	9545	7040	10371	8156	7320	7486	7947	8068	9296	7308	8204	7749	7675	7071	7232	7598	10558	9829	9619	10046	7434	10979	10733	7027	10367	7463	7923	7129	7659	9890	7388	7922	10733	7375	8349	7441	6925	7525	7669	7376	7309	7301	7697	9492	7590	10240
	10 days, 0:04:13	26.9	7872	8387	6771	9197	9981	7614	7439	8417	8097	8453	8336	8987	9397	7969	7062	7660	7637	8965	8318	9014	9348	8153	9633	11356	7381	9032	7397	7555	7147	9842	8668	8143	9110	8727	7499	8776	7135	7465	6776	7421	7124	7333	8273	9203	10331	7624	9200
	10 days, 23:54:50	26.8	8373	11344	7953	9558	8362	8100	7282	7915	7166	9132	7069	7358	11308	7965	8492	8012	7374	9119	9753	7915	8217	7497	9289	15077	8445	9829	8108	8207	7914	11924	10354	7431	9780	9743	7276	7258	8876	8428	7833	7563	7672	7455	9678	10141	11326	7409	8183
	00:00:00
	00:00:00
	00:00:00
	00:00:00
	00:00:00
	00:00:00
	00:00:00
	00:00:00
	00:00:00
	00:00:00
	00:00:00
Read 3:425,475[2]
	Time	T° Read 3:425,475[2]	A1	A2	A3	A4	A5	A6	A7	A8	A9	A10	A11	A12	B1	B2	B3	B4	B5	B6	B7	B8	B9	B10	B11	B12	C1	C2	C3	C4	C5	C6	C7	C8	C9	C10	C11	C12	D1	D2	D3	D4	D5	D6	D7	D8	D9	D10	D11
	00:00:15	36.3	206	245	225	260	248	296	308	272	331	222	294	347	274	280	273	272	230	218	275	244	348	342	282	275	340	289	338	299	330	268	372	339	450	386	329	323	279	292	228	318	288	323	334	287	395	263	330
	23:46:35	26.9	193	270	161	142	153	166	171	184	198	129	126	181	215	172	216	203	193	181	177	156	154	203	159	222	256	191	213	176	179	166	171	211	212	232	144	123	179	192	212	177	169	147	203	176	181	150	132
	1 day, 23:41:01	36.6	178	245	175	181	203	216	203	218	186	232	261	220	259	190	233	212	160	230	192	185	226	186	235	224	249	187	153	197	180	202	230	196	230	171	245	222	188	232	188	164	154	203	130	192	193	183	155
	3 days, 0:00:07	26.9	150	218	185	233	207	140	173	255	207	162	176	197	233	222	219	173	159	149	154	113	193	227	188	158	222	230	220	212	160	140	192	155	156	204	211	185	194	203	198	218	203	157	208	208	180	184	206
	3 days, 23:50:11	26.6	185	203	124	223	184	140	166	178	162	206	178	172	131	137	161	172	130	167	200	155	152	146	194	217	145	142	172	210	201	180	217	119	144	144	165	164	152	147	140	149	135	202	171	131	198	192	202
	4 days, 23:54:19	26.7	184	154	152	169	176	126	169	152	191	141	156	186	144	169	148	113	197	141	161	194	191	154	216	130	178	196	136	192	158	184	230	192	178	139	120	174	168	154	113	193	146	158	188	145	113	159	161
	5 days, 23:56:02	26.7	183	287	196	200	222	270	228	183	243	333	227	196	214	175	243	180	165	221	234	183	217	232	272	233	214	251	224	196	149	167	223	157	179	240	230	207	192	178	212	228	194	162	178	213	190	204	214
	7 days, 0:06:35	26.8	96	120	111	92	95	110	85	116	82	83	75	94	177	104	116	139	164	185	237	175	125	144	205	122	120	176	157	188	198	102	211	106	172	215	197	132	193	142	148	195	125	174	167	147	152	148	158
	8 days, 0:07:29	26.7	134	191	146	228	166	138	151	201	151	274	184	221	190	184	204	221	182	153	177	193	160	172	264	299	140	201	152	143	225	208	188	211	222	257	172	187	199	209	188	196	186	189	213	178	219	169	207
	8 days, 23:21:00	27.1	164	221	152	271	203	208	207	170	210	243	173	213	179	161	193	206	187	257	284	227	247	218	213	281	134	269	152	172	178	151	239	154	224	228	178	198	194	212	150	192	145	187	148	197	222	171	219
	10 days, 0:04:25	26.9	158	230	191	259	191	207	152	228	223	207	166	190	172	211	138	213	201	189	168	247	265	141	280	259	208	206	156	173	205	268	208	135	253	216	187	181	195	202	167	246	143	204	180	233	284	234	239
	10 days, 23:55:02	26.8	189	266	226	242	199	239	143	215	153	280	163	187	261	175	229	220	171	199	299	173	200	172	261	370	238	258	155	223	188	309	265	193	292	185	152	158	218	212	150	185	202	148	263	212	270	153	221
	00:00:00
	00:00:00
	00:00:00
	00:00:00
	00:00:00
	00:00:00
	00:00:00
	00:00:00
	00:00:00
	00:00:00
	00:00:00
Ratio yfp od
	Time	A1	A2	A3	A4	A5	A6	A7	A8	A9	A10	A11	A12	B1	B2	B3	B4	B5	B6	B7	B8	B9	B10	B11	B12	C1	C2	C3	C4	C5	C6	C7	C8	C9	C10	C11	C12	D1	D2	D3	D4	D5	D6	D7	D8	D9	D10	D11	D12
	00:00:03	1866.15	1222.74	880.587	1362.24	1125.52	970.778	931.677	1272.13	874.098	1240.99	973.417	1031.53	1812.72	1498.42	999.164	894.737	873.933	673.975	1240.31	855.365	884.114	1305.83	1044.25	967.862	1028.62	625.528	1056.51	738.676	664.611	671.206	889.58	791.166	487.157	969.828	833.035	966.167	907.626	994.197	938.673	1015.74	539.523	806.402	839.576	734.398	813.397	718.894	1281.96	690.096
	23:46:23	925.267	843.432	1276.45	1250	1300.22	1268.19	1539.61	1972.29	1528.76	2101.62	1780.19	1407.23	1222.47	1458.46	1486.21	1712.24	2763.28	1341.89	1336.61	2000	2108.43	2129.57	1503.02	1471.86	470.488	1154.45	1317.87	1547.28	829.493	1428.57	1268.84	1198.82	1153.15	584.153	1417.37	1273.07	1165.38	1526.01	1389.52	914.729	755.784	1045.38	902.637	753.86	690.488	1133.01	1264.37	1215.03
	1 day, 23:40:49	988.858	2014.18	1455.74	1921.78	1495.26	1104.9	880.231	1661.22	1610.04	1555.39	1126.68	1675.06	2068.42	1008.35	1011.36	983.051	1259.1	1638.34	1193.1	1493.98	794.669	1040.31	864.662	1320.76	1395.2	1461.33	998.472	1393.83	910.031	719.697	1837.77	2079.29	944.417	1318.9	1234.96	1104.59	821.918	1538.89	1020.78	1014.18	1390.58	910.518	1035.02	1219.17	1511.25	1016.59	1229.05	1298.84
	2 days, 23:59:55	1089.35	1861.29	1252.9	1638.42	1821.49	1902.77	1563.75	1629.77	1189.23	2325.91	1643.04	1419.7	1380.66	1062.65	1907.22	2000	1951.48	1827.02	2004.72	1869.61	838.619	1887.79	1543.28	1874.14	812.738	692.168	2251.66	2138.47	2089.93	1345.25	2036.5	1663.5	1566.7	1748.92	1006.02	1481.48	757.421	1676.05	1809.18	1805.43	1843.32	1736.11	1982.83	1682.82	1743.36	1454.55	1676.36	1424.6
	3 days, 23:49:59	1688.68	2032.97	2153.85	1748.77	2485.93	2034.38	2579.44	1606.81	1541.71	2504.62	1993.9	2524.85	1343.16	1885.01	1631.27	2531.12	1363.64	2207.25	2263.97	2718.05	1547.96	2402.86	2082.98	1617.36	1134.02	2219.02	2989.97	2740	1532.92	2231.58	1436.39	2143.54	3212.93	1791.91	2928.23	2446.58	2185.52	2446.62	1370.56	2405.71	1976.52	1814.47	1801.18	2054.92	1750.97	1922.7	1531.01	1921.23
	4 days, 23:54:08	2868.53	2589.87	2740	1572.02	1839.53	1772.28	2170.92	2974.81	2401.61	1712.45	1608.96	1561.89	2083.75	1973.55	2344.4	1415.29	2128.51	2054.93	1981.13	1576.88	2348.41	2541.32	1993.07	2096.44	3179.24	2312.86	2467.04	1947.79	2130.52	1991.61	2553.59	1529.85	2074.57	1958.66	2321.43	2537.92	2005.87	1261	2937.06	2691.19	2303.15	2439.5	3512.48	1686.75	3015.23	2018.54	3300.1	1930.21
	5 days, 23:55:50	1142.86	1171.88	1153.16	1411.7	1187.08	873.706	767.974	1205.58	1229.13	1479.8	871.817	1257.86	1467.76	1101.01	1625	530.68	1271.77	1044.46	1928.27	1188.77	1706.92	940.26	1302.52	1350.13	1515.88	1942.28	1930.59	1405.01	1471.23	1823.39	1640.36	1236.15	1068.7	1562.98	1016.02	1251.03	1569.18	1962.26	1327.67	1165.51	1077	886.018	1238.33	787.402	819.431	1110.52	1145.57	889.521
	7 days, 0:06:23	2580.98	3308.59	2065.22	1890.71	2851.71	2402.09	3189.54	2849.81	1469.44	2396.14	1627.36	1863.45	2610.89	2105.26	2277.13	2325.58	2256.51	2304.1	3765.88	1867.59	2032.18	2133.85	1526.43	1440.75	2426.54	2646.55	1864.72	2676.86	2608.7	2064.7	1721.04	2910	1704.86	2610.91	2566.54	1552.35	2056.07	1286.77	2816.62	1335.2	2388.66	2651.82	2500	3107.82	2136.03	2873.79	1866.85	2100.09
	8 days, 0:07:17	1555.75	1674.67	2081.38	2024.08	1649.92	1677.21	1689.32	2070.03	2295.41	2895.88	2434.37	2791.13	1575.89	1795.49	1208.97	1841.6	2350.43	2486.66	3087.61	2362.36	2640.21	2274.21	3930.82	1649.75	1736.43	1546.52	1817.57	2881.54	2022.94	2366.67	2275.73	1790.02	2090.81	3396.58	2272.73	2700.11	883.352	1276.25	1623	2033.19	2206.48	2848.03	1454.96	2158.2	3077.96	2042.04	2428.09	965.447
	8 days, 23:20:48	1984.82	2183.91	2742.44	2343.62	1938.28	2090.16	1842.65	1860.71	2024.54	2440.65	2637.47	2829.37	2037.77	1425.99	2482.27	1791.44	2181.47	2082.96	1846.03	1673.67	1699.93	2196.75	2227.85	2103.53	1827.75	2011.92	1708.63	1928.35	1817.34	1864.89	2103.24	1441.44	2145.67	1895.46	1846.31	2328.91	1702.53	2279.12	1793.17	2028.99	2490.42	2126.21	1386.04	2041.03	2566.84	2108.91	1915.56	2296.14
	10 days, 0:04:14	909.894	2430.17	2530.46	2245.43	1746.32	2514.23	1565.91	2189.92	2289.04	2669.36	2342.52	1450.91	2685.27	1539.12	1965.42	1880.27	2120.66	1954.02	2873.46	1368.35	1666.67	1270.42	2414.51	1859.78	1695.22	1840.11	1627.32	2638.04	1277.5	2791.19	1627.72	1731.09	2242.06	2699.68	2031.54	2965.45	1345.62	2167.44	1816.48	1926.44	1409.02	1216.97	2076.35	2005.12	2086.72	1890.97	1891.03	1805.43
	10 days, 23:54:50	1159.77	882.536	1267.81	942.706	1437.78	1198.79	1470.77	1314.64	2489.18	1284.28	1614.65	1833.44	1449.49	718.304	1218.54	898.38	1443.64	1348.45	1602.25	1405.84	1150.11	941.176	1463.41	2580.64	991.591	883.162	701.432	730.007	1303.36	865.823	1185.14	1318.21	1427.59	887.026	1525.42	2271.13	715.428	876.328	1095.49	1114.77	1267.11	1271.06	1459.4	1908.83	2424.03	1556.21	1682.91	2230.48
	00:00:00	?????	?????	?????	?????	?????	?????	?????	?????	?????	?????	?????	?????	?????	?????	?????	?????	?????	?????	?????	?????	?????	?????	?????	?????	?????	?????	?????	?????	?????	?????	?????	?????	?????	?????	?????	?????	?????	?????	?????	?????	?????	?????	?????	?????	?????	?????	?????	?????
	00:00:00	?????	?????	?????	?????	?????	?????	?????	?????	?????	?????	?????	?????	?????	?????	?????	?????	?????	?????	?????	?????	?????	?????	?????	?????	?????	?????	?????	?????	?????	?????	?????	?????	?????	?????	?????	?????	?????	?????	?????	?????	?????	?????	?????	?????	?????	?????	?????	?????
	00:00:00	?????	?????	?????	?????	?????	?????	?????	?????	?????	?????	?????	?????	?????	?????	?????	?????	?????	?????	?????	?????	?????	?????	?????	?????	?????	?????	?????	?????	?????	?????	?????	?????	?????	?????	?????	?????	?????	?????	?????	?????	?????	?????	?????	?????	?????	?????	?????	?????
	00:00:00	?????	?????	?????	?????	?????	?????	?????	?????	?????	?????	?????	?????	?????	?????	?????	?????	?????	?????	?????	?????	?????	?????	?????	?????	?????	?????	?????	?????	?????	?????	?????	?????	?????	?????	?????	?????	?????	?????	?????	?????	?????	?????	?????	?????	?????	?????	?????	?????
	00:00:00	?????	?????	?????	?????	?????	?????	?????	?????	?????	?????	?????	?????	?????	?????	?????	?????	?????	?????	?????	?????	?????	?????	?????	?????	?????	?????	?????	?????	?????	?????	?????	?????	?????	?????	?????	?????	?????	?????	?????	?????	?????	?????	?????	?????	?????	?????	?????	?????
	00:00:00	?????	?????	?????	?????	?????	?????	?????	?????	?????	?????	?????	?????	?????	?????	?????	?????	?????	?????	?????	?????	?????	?????	?????	?????	?????	?????	?????	?????	?????	?????	?????	?????	?????	?????	?????	?????	?????	?????	?????	?????	?????	?????	?????	?????	?????	?????	?????	?????
	00:00:00	?????	?????	?????	?????	?????	?????	?????	?????	?????	?????	?????	?????	?????	?????	?????	?????	?????	?????	?????	?????	?????	?????	?????	?????	?????	?????	?????	?????	?????	?????	?????	?????	?????	?????	?????	?????	?????	?????	?????	?????	?????	?????	?????	?????	?????	?????	?????	?????
	00:00:00	?????	?????	?????	?????	?????	?????	?????	?????	?????	?????	?????	?????	?????	?????	?????	?????	?????	?????	?????	?????	?????	?????	?????	?????	?????	?????	?????	?????	?????	?????	?????	?????	?????	?????	?????	?????	?????	?????	?????	?????	?????	?????	?????	?????	?????	?????	?????	?????
	00:00:00	?????	?????	?????	?????	?????	?????	?????	?????	?????	?????	?????	?????	?????	?????	?????	?????	?????	?????	?????	?????	?????	?????	?????	?????	?????	?????	?????	?????	?????	?????	?????	?????	?????	?????	?????	?????	?????	?????	?????	?????	?????	?????	?????	?????	?????	?????	?????	?????
	00:00:00	?????	?????	?????	?????	?????	?????	?????	?????	?????	?????	?????	?????	?????	?????	?????	?????	?????	?????	?????	?????	?????	?????	?????	?????	?????	?????	?????	?????	?????	?????	?????	?????	?????	?????	?????	?????	?????	?????	?????	?????	?????	?????	?????	?????	?????	?????	?????	?????
	00:00:00	?????	?????	?????	?????	?????	?????	?????	?????	?????	?????	?????	?????	?????	?????	?????	?????	?????	?????	?????	?????	?????	?????	?????	?????	?????	?????	?????	?????	?????	?????	?????	?????	?????	?????	?????	?????	?????	?????	?????	?????	?????	?????	?????	?????	?????	?????	?????	?????
Ratio cfp od
	Time	A1	A2	A3	A4	A5	A6	A7	A8	A9	A10	A11	A12	B1	B2	B3	B4	B5	B6	B7	B8	B9	B10	B11	B12	C1	C2	C3	C4	C5	C6	C7	C8	C9	C10	C11	C12	D1	D2	D3	D4	D5	D6	D7	D8	D9	D10	D11	D12
	00:00:03	58944.7	70700.6	58612.4	51765.3	66717.7	53893	52173.9	57288	49715.3	57868.2	49179	49019.1	65054	58464.8	45719.1	63831.6	53716.7	39914.7	50036.5	46454.1	46171.2	58175.2	44396.5	45280.3	54517	54167.4	54131.9	41682.9	45073.7	42016.9	40870.9	41300	51907.3	50905.2	42509.8	45811	59339.4	54560.9	46437.2	48639.4	42628.6	36152.7	42724.7	38449.9	41716.9	36021.5	42819.6	39549.5
	23:46:23	43253.7	43979.6	47447.1	53161.8	54477.7	37531.2	53505.2	58761.2	49550.8	46743.6	46656.3	46603.8	42292.1	47393.9	55971.8	44811.2	59613	43623.1	46432.1	52074.1	56041.3	51082	49765.9	50476.2	39974.3	46115.4	45503.4	49507.2	40741.9	48743.8	36378.2	40231.9	45579.6	40503.2	41170.1	42552.5	37947.7	43959.8	53035.3	31186	39778.9	33360.5	40187.6	28269.8	34326.4	30000	42887.9	49776.2
	1 day, 23:40:49	56490.3	61531.9	57578.6	50229.3	57002.2	54748.6	39543.1	56926.1	62828.7	66532.6	54565.1	57720.4	63945.9	55347.7	45215.9	53383.1	57540	52828	56682.8	49114.5	43815.4	49705.9	42636.3	44250.2	56327.1	41392	36928.2	43404.5	40398.1	48232.3	52750.3	58106.8	39183.5	44109.3	56320.5	51366.1	54664.7	45129.6	46509.8	49751.8	57902.7	37692.3	37919.7	53981.7	58850.5	44868.9	53051.7	41140.4
	2 days, 23:59:55	52160.3	61457.9	56620.3	72702.4	71120.2	71542.3	66936.6	52324.7	63096.5	60495.3	57648.2	60504.3	51565.1	45853.8	63651.2	73914.3	80116	73362.5	58301.9	73672.1	57188.2	56929.5	51531.9	54792.5	44857.4	51050.4	65463.6	64653.8	66686.1	72831.6	73197.1	72899.2	66132.5	73368	46530.1	56787.6	48311.2	51106.9	69000.9	71768	69437.8	66796.9	64652.4	65806.2	66681.4	69963.6	67819.8	56740.8
	3 days, 23:49:59	63594.3	56397.2	60826.9	63407.2	67945.6	68080.2	62859.8	63185.3	73822.6	70582.3	72695.8	73697.8	56797.7	59349.7	64218.1	66307.1	71888.9	70082.9	67042.4	70993.9	64359	68578.7	69000.8	72574	45319.6	62449.6	59690.1	63350	67767.5	70663.2	63782.5	68267.9	65038	66425.8	60201	78226.5	46521.4	57526.7	57927.2	69735	66731.9	66136.6	72135.8	69072	72363.8	69719.8	71850.8	66830
	4 days, 23:54:07	63934.3	64591.5	66370	68617.3	66839.5	68257.4	71620.8	70910.9	67295.7	75457.9	68554	73791.7	61535.4	63926.8	70487.6	71260.3	65351.4	68575.8	65764.2	63545.5	69412.9	71115.7	70623.9	70010.5	60820.8	66449.1	60235.4	69889.6	59472.2	67285.1	69329	65587.7	65621.4	64488.2	64842.4	68220.4	62416.8	64281.5	61208.8	66834.5	62805.1	60900.3	64673.7	62687.7	66203	69392.4	65224.3	75736.1
	5 days, 23:55:50	44355.9	61129.8	45712.6	48080.1	35205.5	37399.6	45855.1	37914.6	45791.6	47708.6	42710.4	44155.4	57441.7	40580.8	46102.3	44372.6	44179.4	44177.8	51777.5	45283.4	44219	41542.9	50330.9	44952.1	49904.1	73081.1	63087.5	52083.1	44929.4	47156	53348.4	47836.7	41068.7	47326.5	39784.8	40078.2	48329.6	78669.8	43430.7	34995.7	36943.8	39127.8	38014.7	37846.2	41182.5	44564.9	45352.7	34528.8
	7 days, 0:06:23	49049.1	58176	54009.7	61737.7	56463.9	55939.9	56300.7	57240.1	51560.5	55797.1	51025.9	32112.5	64012.1	59671.1	58343	62598.6	55303.8	60494.4	72531.8	62687.7	60855.2	59621.7	68451.2	57297.5	60094.8	57715.5	58473.5	60554.5	59613.5	59248.3	68597.1	56570	54399.6	57963.6	57747.1	62933.2	68629.3	60376.8	59412.4	54379.1	56214.6	60536.4	68500	68255.8	66418.7	54961.2	57172.3	64057.2
	8 days, 0:07:17	58893.7	61015.8	57323.9	72648.6	65954.8	74219.4	67747.6	72677.7	67594.8	86464.2	82625.3	68909.4	43352.7	69396.1	63618.9	73950.4	75128.2	87534.7	98803.4	83974	71604.8	83895.5	98008.4	87250.4	62930.2	58712.3	52317.6	74717.2	72992.7	80933.3	84900.9	65034.4	77127.8	81556	87659.1	100598	34677.2	66300.5	57329	76473	69858.3	81424	56974.6	80947.3	118804	75986	82521.2	92195.1
	8 days, 23:20:48	78731	78366.2	73409.8	86497.1	78650	75000	77494.8	82609.1	82494.9	88281.1	74419.6	88596.1	77027.8	69269	71641.3	64456.3	73339.8	95202.9	81365.9	67359.9	74249.8	71002.9	92649.8	88192.3	67244	77250.4	67113.3	83487.9	66439.9	72873.5	76194.1	66558.6	77972.4	61648.5	73602.8	85280.9	69607.1	69528.1	71394.7	74096.6	70651.3	70961.2	74958.9	78943.6	101519	75148.5	80062.5	91502.1
	10 days, 0:04:13	69540.6	58568.4	63458.3	80043.5	91737.1	72239.1	73726.5	81560.1	78535.4	85470.2	82047.2	78079.9	81926.8	67763.6	64258.4	64586.8	69808	73604.3	73093.1	62294.4	77512.4	73983.7	99823.8	83808.1	66555.5	62246.7	62369.3	77249.5	60465.3	103274	69846.9	68428.6	90377	69704.5	69564	84222.6	65760.4	69441.9	63445.7	64982.5	57359.1	58711	77029.8	78523.9	93324.3	64940.4	73717.9	85293.6
	10 days, 23:54:50	40293.6	35251.7	39081.1	38837.9	53913.6	40971.2	43893.9	49314.6	51702.7	41736.7	47957.9	49415.7	55187.9	34465.6	33927.3	39332.4	40943.9	54409.3	39263.3	41989.4	44368.3	46421.1	55258.8	105729	29590	33776.6	29776	30106.4	35940.1	60374.7	34663.5	40145.9	67124.2	42996.5	39781.3	63890.8	35475.6	31972.7	32381.1	35573.8	38884.9	35893.1	54957.4	72229.3	78218.2	43840.2	53170.9	76784.4
	00:00:00	?????	?????	?????	?????	?????	?????	?????	?????	?????	?????	?????	?????	?????	?????	?????	?????	?????	?????	?????	?????	?????	?????	?????	?????	?????	?????	?????	?????	?????	?????	?????	?????	?????	?????	?????	?????	?????	?????	?????	?????	?????	?????	?????	?????	?????	?????	?????	?????
	00:00:00	?????	?????	?????	?????	?????	?????	?????	?????	?????	?????	?????	?????	?????	?????	?????	?????	?????	?????	?????	?????	?????	?????	?????	?????	?????	?????	?????	?????	?????	?????	?????	?????	?????	?????	?????	?????	?????	?????	?????	?????	?????	?????	?????	?????	?????	?????	?????	?????
	00:00:00	?????	?????	?????	?????	?????	?????	?????	?????	?????	?????	?????	?????	?????	?????	?????	?????	?????	?????	?????	?????	?????	?????	?????	?????	?????	?????	?????	?????	?????	?????	?????	?????	?????	?????	?????	?????	?????	?????	?????	?????	?????	?????	?????	?????	?????	?????	?????	?????
	00:00:00	?????	?????	?????	?????	?????	?????	?????	?????	?????	?????	?????	?????	?????	?????	?????	?????	?????	?????	?????	?????	?????	?????	?????	?????	?????	?????	?????	?????	?????	?????	?????	?????	?????	?????	?????	?????	?????	?????	?????	?????	?????	?????	?????	?????	?????	?????	?????	?????
	00:00:00	?????	?????	?????	?????	?????	?????	?????	?????	?????	?????	?????	?????	?????	?????	?????	?????	?????	?????	?????	?????	?????	?????	?????	?????	?????	?????	?????	?????	?????	?????	?????	?????	?????	?????	?????	?????	?????	?????	?????	?????	?????	?????	?????	?????	?????	?????	?????	?????
	00:00:00	?????	?????	?????	?????	?????	?????	?????	?????	?????	?????	?????	?????	?????	?????	?????	?????	?????	?????	?????	?????	?????	?????	?????	?????	?????	?????	?????	?????	?????	?????	?????	?????	?????	?????	?????	?????	?????	?????	?????	?????	?????	?????	?????	?????	?????	?????	?????	?????
	00:00:00	?????	?????	?????	?????	?????	?????	?????	?????	?????	?????	?????	?????	?????	?????	?????	?????	?????	?????	?????	?????	?????	?????	?????	?????	?????	?????	?????	?????	?????	?????	?????	?????	?????	?????	?????	?????	?????	?????	?????	?????	?????	?????	?????	?????	?????	?????	?????	?????
	00:00:00	?????	?????	?????	?????	?????	?????	?????	?????	?????	?????	?????	?????	?????	?????	?????	?????	?????	?????	?????	?????	?????	?????	?????	?????	?????	?????	?????	?????	?????	?????	?????	?????	?????	?????	?????	?????	?????	?????	?????	?????	?????	?????	?????	?????	?????	?????	?????	?????
	00:00:00	?????	?????	?????	?????	?????	?????	?????	?????	?????	?????	?????	?????	?????	?????	?????	?????	?????	?????	?????	?????	?????	?????	?????	?????	?????	?????	?????	?????	?????	?????	?????	?????	?????	?????	?????	?????	?????	?????	?????	?????	?????	?????	?????	?????	?????	?????	?????	?????
	00:00:00	?????	?????	?????	?????	?????	?????	?????	?????	?????	?????	?????	?????	?????	?????	?????	?????	?????	?????	?????	?????	?????	?????	?????	?????	?????	?????	?????	?????	?????	?????	?????	?????	?????	?????	?????	?????	?????	?????	?????	?????	?????	?????	?????	?????	?????	?????	?????	?????
	00:00:00	?????	?????	?????	?????	?????	?????	?????	?????	?????	?????	?????	?????	?????	?????	?????	?????	?????	?????	?????	?????	?????	?????	?????	?????	?????	?????	?????	?????	?????	?????	?????	?????	?????	?????	?????	?????	?????	?????	?????	?????	?????	?????	?????	?????	?????	?????	?????	?????
Ratio yfp cfp
	Time	A1	A2	A3	A4	A5	A6	A7	A8	A9	A10	A11	A12	B1	B2	B3	B4	B5	B6	B7	B8	B9	B10	B11	B12	C1	C2	C3	C4	C5	C6	C7	C8	C9	C10	C11	C12	D1	D2	D3	D4	D5	D6	D7	D8	D9	D10	D11	D12
	00:00:15	5.689	4.649	3.729	3.638	4.194	3.551	3.695	3.404	2.855	4.356	3.483	2.991	3.376	2.468	3.429	3.25	3.774	6.142	4.007	3.574	3.204	2.781	3.163	3.538	2.585	3.363	2.66	3.475	3.152	3.168	2.417	3.478	1.711	2.264	3.116	3.78	2.914	2.986	4.079	2.5	4.156	3.05	3.186	3.007	2.58	3.494	4.033	3.727
	23:46:35	6.062	2.656	5.037	6.021	6.516	5.09	4.404	5.875	6.823	6.589	6.222	4.166	5.753	4.233	3.634	4.005	4.984	5.983	4.723	4.237	3.87	5.108	5.616	3.698	3.992	4.414	6.085	6.409	6.659	6.747	4.193	3.962	3.604	3.422	5.75	7.39	4.916	5.443	3.821	4.559	6.781	5.401	5.453	4.705	5.459	4.927	5.28	5.983
	1 day, 23:41:01	3.404	3.482	3.451	5.757	4.611	3.546	4.547	3.913	5.952	3.664	3.184	5.027	2.208	4.984	3.524	3.604	5.1	3.617	4.589	4.297	5.226	5.763	2.987	3.772	3	5.535	6.497	3.198	4.45	2.851	4.787	3.622	4.161	5.532	3.127	3.059	4.782	3.237	5.537	5.396	5.422	3.783	5.492	4.385	4.145	5.355	5.323	6.517
	3 days, 0:00:07	4.28	3.679	4.519	2.768	3.884	5.514	5.098	2.898	4.57	7.062	4.568	3.827	3.412	3.144	4.384	4.266	3.264	4.121	6.805	5.743	5.446	3.181	2.84	5.658	3.59	4.287	3.459	5.429	3.194	4.914	4.307	4.271	6.327	4.353	4.038	4.135	3.964	4.202	2.909	2.839	3.744	5.968	3.226	4.635	3.378	4.859	4.583	3.009
	3 days, 23:50:11	5.443	6.424	6.782	4.821	3.88	6.436	4.596	4.697	6.173	5.519	6.281	4.541	6.969	5.942	4.379	5.076	7.369	4.988	4.505	4.484	4.743	5.041	5.711	4.065	6.145	6.838	5.11	4.248	5.075	3.683	4.226	8.513	6.389	7.826	3.206	4.774	5.283	6.415	5.579	5.523	4.733	4.693	3.69	7.099	4.192	4.526	4.837	3.311
	4 days, 23:54:20	4.799	6.675	6.447	5.101	4.96	8.325	5.544	5.711	4.476	8.823	6.615	4.86	6.854	5.947	5.304	7.611	4.102	7.489	6.596	4.392	5.812	5.325	4.477	7.354	4.68	4.673	7.566	4.656	5.5	5.25	5.317	5.016	5.326	5.863	6.633	5.408	5.315	6.909	6.283	5.876	7.219	5.601	4.92	5.648	5.743	4.811	6.124	8.082
	5 days, 23:56:02	4.847	4.091	3.735	3.93	4.797	2.844	4.048	5.448	4.374	5.408	4.273	4.898	3.654	4.566	4.288	5.406	7.539	3.602	5.248	5.617	4.608	3.19	3.985	3.489	5.393	4.084	4.121	3.577	7.067	6.198	5.013	6.586	5.542	3.958	4.361	4.401	5.172	4.517	4.868	4.803	5.521	7.068	4.708	3.178	4.916	3.412	3.907	4.967
	7 days, 0:06:35	10.531	7.958	7.658	8.772	6.305	8.136	7.965	4.069	9.378	13.88	11.92	9.096	4.158	7.413	6.888	8.158	6.756	4.746	4.975	6.28	7.096	5.563	5.644	8.041	8.633	5.705	5.28	4.723	4.909	8.804	6.422	7.887	6.709	5.479	4.954	7.788	6.166	6.627	6.399	5.041	8.6	5.672	6.401	7.395	6.928	6	7.551	5.396
	8 days, 0:07:29	5.843	5.911	4.829	5.404	7.211	7.522	5.358	3.463	4.834	4.336	4.353	4.715	5.495	7.467	4.868	3.538	5.352	7.085	6.429	5.549	7.731	5.047	4.402	4.559	5.15	7.299	6.118	5.175	4.324	4.654	6.101	3.607	4.941	3.307	6.628	6.444	5.422	3.99	5.372	4.76	3.898	4.899	4.019	3.966	3.279	5.456	4.681	6.006
	8 days, 23:21:00	6.366	3.367	4.908	3.306	5.01	4.438	3.15	5.494	4.31	4.407	4.023	3.723	5.017	5.503	3.731	4.131	4.925	4.553	4.261	3.797	3.988	4.72	5.657	3.224	4.507	4.063	3.724	5.442	6.124	5.053	3.816	5.104	3.741	4.86	5.955	5.126	3.443	4.514	5.953	4.229	4.103	4.401	5.581	4.99	4.806	4.205	3.37	3.126
	10 days, 0:04:26	5.468	4.317	2.874	4.263	5.817	5.039	4.711	4.158	2.65	3.357	4.759	4.068	5.802	3.137	3.377	4.028	5.522	4.778	8.369	3.7	3.789	5.957	5.279	3.247	3.966	4.515	4.987	4.347	4.268	4.504	4.332	7.089	3.968	5.167	5.353	3.564	4.021	4.04	5.425	3.382	5.51	4.681	5.467	3.803	3.493	3.274	4.615	3.436
	10 days, 23:55:02	6.196	5.553	4.053	5.029	5.176	3.079	6.979	3.828	6.974	4.154	7.074	3.16	3.885	5.463	5.218	3.623	5.269	7.08	3.883	5.59	5.72	3.355	5.069	3.135	3.584	3.721	3.961	3.108	5.995	4.803	4.249	3.855	3.87	4.892	7.559	5.196	3.739	5.434	4.113	4.622	3.406	6.209	4.703	3.981	2.996	5.667	3.946	4.515
	00:00:00	?????	?????	?????	?????	?????	?????	?????	?????	?????	?????	?????	?????	?????	?????	?????	?????	?????	?????	?????	?????	?????	?????	?????	?????	?????	?????	?????	?????	?????	?????	?????	?????	?????	?????	?????	?????	?????	?????	?????	?????	?????	?????	?????	?????	?????	?????	?????	?????
	00:00:00	?????	?????	?????	?????	?????	?????	?????	?????	?????	?????	?????	?????	?????	?????	?????	?????	?????	?????	?????	?????	?????	?????	?????	?????	?????	?????	?????	?????	?????	?????	?????	?????	?????	?????	?????	?????	?????	?????	?????	?????	?????	?????	?????	?????	?????	?????	?????	?????
	00:00:00	?????	?????	?????	?????	?????	?????	?????	?????	?????	?????	?????	?????	?????	?????	?????	?????	?????	?????	?????	?????	?????	?????	?????	?????	?????	?????	?????	?????	?????	?????	?????	?????	?????	?????	?????	?????	?????	?????	?????	?????	?????	?????	?????	?????	?????	?????	?????	?????
	00:00:00	?????	?????	?????	?????	?????	?????	?????	?????	?????	?????	?????	?????	?????	?????	?????	?????	?????	?????	?????	?????	?????	?????	?????	?????	?????	?????	?????	?????	?????	?????	?????	?????	?????	?????	?????	?????	?????	?????	?????	?????	?????	?????	?????	?????	?????	?????	?????	?????
	00:00:00	?????	?????	?????	?????	?????	?????	?????	?????	?????	?????	?????	?????	?????	?????	?????	?????	?????	?????	?????	?????	?????	?????	?????	?????	?????	?????	?????	?????	?????	?????	?????	?????	?????	?????	?????	?????	?????	?????	?????	?????	?????	?????	?????	?????	?????	?????	?????	?????
	00:00:00	?????	?????	?????	?????	?????	?????	?????	?????	?????	?????	?????	?????	?????	?????	?????	?????	?????	?????	?????	?????	?????	?????	?????	?????	?????	?????	?????	?????	?????	?????	?????	?????	?????	?????	?????	?????	?????	?????	?????	?????	?????	?????	?????	?????	?????	?????	?????	?????
	00:00:00	?????	?????	?????	?????	?????	?????	?????	?????	?????	?????	?????	?????	?????	?????	?????	?????	?????	?????	?????	?????	?????	?????	?????	?????	?????	?????	?????	?????	?????	?????	?????	?????	?????	?????	?????	?????	?????	?????	?????	?????	?????	?????	?????	?????	?????	?????	?????	?????
	00:00:00	?????	?????	?????	?????	?????	?????	?????	?????	?????	?????	?????	?????	?????	?????	?????	?????	?????	?????	?????	?????	?????	?????	?????	?????	?????	?????	?????	?????	?????	?????	?????	?????	?????	?????	?????	?????	?????	?????	?????	?????	?????	?????	?????	?????	?????	?????	?????	?????
	00:00:00	?????	?????	?????	?????	?????	?????	?????	?????	?????	?????	?????	?????	?????	?????	?????	?????	?????	?????	?????	?????	?????	?????	?????	?????	?????	?????	?????	?????	?????	?????	?????	?????	?????	?????	?????	?????	?????	?????	?????	?????	?????	?????	?????	?????	?????	?????	?????	?????
	00:00:00	?????	?????	?????	?????	?????	?????	?????	?????	?????	?????	?????	?????	?????	?????	?????	?????	?????	?????	?????	?????	?????	?????	?????	?????	?????	?????	?????	?????	?????	?????	?????	?????	?????	?????	?????	?????	?????	?????	?????	?????	?????	?????	?????	?????	?????	?????	?????	?????
	00:00:00	?????	?????	?????	?????	?????	?????	?????	?????	?????	?????	?????	?????	?????	?????	?????	?????	?????	?????	?????	?????	?????	?????	?????	?????	?????	?????	?????	?????	?????	?????	?????	?????	?????	?????	?????	?????	?????	?????	?????	?????	?????	?????	?????	?????	?????	?????	?????	?????
Ratio cfp2 od
	Time	A1	A2	A3	A4	A5	A6	A7	A8	A9	A10	A11	A12	B1	B2	B3	B4	B5	B6	B7	B8	B9	B10	B11	B12	C1	C2	C3	C4	C5	C6	C7	C8	C9	C10	C11	C12	D1	D2	D3	D4	D5	D6	D7	D8	D9	D10	D11	D12
	00:00:15	1325.61	1619.3	1501	1326.53	1461.4	1466.07	1275.36	1267.47	1327.18	1143.15	1149.34	1350.72	1644.66	1472.13	1141.3	1431.58	1155.2	885.099	1253.99	948.678	1225.78	1454.7	998.23	1027.65	1520.57	1221.47	1384.11	1041.81	1130.52	869.001	1157.08	947.722	1328.61	1188.42	1176.26	1126.61	1498.39	1129.59	951.189	1191.9	903.388	994.152	1042.45	833.091	1111.74	807.988	1188.33	817.891
	23:46:35	981.19	1308.77	1098.98	1044.12	1117.6	862.786	1278.03	1499.59	1560.28	993.072	975.232	1422.96	966.292	1028.09	1452.59	1321.62	1737.17	1056.01	965.63	1050.51	1325.3	1399.04	1200.91	1601.73	1094.95	993.24	1122.83	1008.6	824.885	1022.17	831.308	1040.95	1273.27	1341.82	868.516	782.941	766.924	942.1	1207.29	686.047	868.895	749.618	1029.41	799.273	873.974	738.916	948.276	927.258
	1 day, 23:41:01	1239.55	1737.59	1280.18	1220.5	1480.67	1340.78	976.431	1425.77	1373.71	1760.24	1523.64	1385.39	2060.46	1321.28	1323.86	1437.29	1164.48	1563.56	1324.14	1114.46	1115.5	1013.07	1104.32	1112.21	1615.83	997.333	779.419	1168.45	930.714	1275.25	1457.54	1585.76	1131.33	841.535	1551.62	1184.63	1355.44	1279.65	1149.14	1163.12	1170.21	1062.27	669.413	1353.07	1551.45	979.133	1082.4	776.135
	3 days, 0:00:07	917.993	1542.82	1430.78	2193.97	1885.25	1173.51	1387.33	1568.27	1548.24	1162.96	1134.02	1528.32	1302.4	1363.64	1881.44	1647.62	1677.21	1448.01	1210.69	1083.41	1360.11	1721	1070.62	1092.67	1055.13	1396.48	1821.19	1858.02	1332.22	1317.03	1401.46	1473.38	1396.6	1766.23	1271.08	1398.34	992.835	1269.54	1782.18	2039.29	1870.97	1362.85	1785.41	1832.6	1592.92	1672.73	1996.12	1521.89
	3 days, 23:50:11	1745.28	1593.41	1192.31	1830.87	1726.08	1337.15	1551.4	1682.42	1710.66	1903.88	1810.78	1709.74	1072.89	1291.23	1554.05	1784.23	1313.13	1730.57	1926.78	1572.01	1443.49	1492.84	1642.68	2140.04	996.564	1364.07	1567.91	2100	2067.9	1894.74	1484.27	1138.76	1368.82	1387.28	1578.95	1752.14	1068.17	1307.83	1184.43	1518.86	1320.94	2059.12	1683.07	1240.53	1926.07	1855.07	1957.36	2036.5
	4 days, 23:54:19	1832.67	1258.17	1520	1390.95	1722.11	1247.53	1660.12	1472.87	1927.35	1291.21	1588.6	1827.11	1435.69	1719.23	1535.27	1167.36	1977.91	1434.38	1518.87	1900.1	1838.31	1590.91	1871.75	1362.68	1679.24	1881	1280.6	1927.71	1516.32	1928.72	2143.52	1791.05	1701.72	1368.11	1260.5	1759.35	1643.84	1505.38	1128.87	1868.35	1437.01	1529.53	1804.22	1343.84	1147.21	1637.49	1605.18	1330.42
	5 days, 23:56:02	917.293	1724.76	1159.08	1026.69	931.208	1118.01	1241.83	774.112	1229.13	1257.08	979.715	880.503	1467.76	883.838	1380.68	995.025	870.712	1183.72	1216.22	1007.15	1164.79	1205.19	1428.57	1173.8	1282.2	1957.88	1619.67	1197.31	808.903	957.569	1257.05	915.452	910.941	1233.93	1151.15	851.852	1079.87	1679.24	1125.86	987.868	916.391	747.577	874.693	986.568	932.287	1089.16	1070.54	852.965
	7 days, 0:06:35	1003.13	1272.53	1340.58	1005.46	1204.06	1436.03	1111.11	1489.09	1066.32	801.932	884.434	755.02	1784.27	977.444	1124.03	1405.46	1581.48	1725.75	2150.64	1729.25	1058.42	1396.7	1526.43	1040.07	1137.44	1517.24	1435.1	1797.32	1913.04	970.504	1721.04	1060	1576.54	1563.64	1872.62	1191.34	2004.15	1305.15	1499.49	1820.73	1265.18	1761.13	1739.58	1553.91	1615.3	1436.89	1084.42	1510.28
	8 days, 0:07:29	1158.17	1310.91	1142.41	1715.58	1390.29	1455.7	1466.02	2070.03	1506.99	2971.8	2195.7	2042.51	1004.76	1481.48	1633.31	2108.78	1944.44	1632.87	1891.03	1931.93	1380.5	1871.6	2767.3	2529.61	1085.27	1238.45	1027.03	1526.15	2346.19	2311.11	1775.26	1815.84	2344.24	2438.33	1954.55	1995.73	751.227	1688.21	1368.27	2033.19	1882.59	2008.5	1639.72	1738.28	2943.55	1691.69	1751.27	1747.97
	8 days, 23:21:00	1778.74	1814.45	1584.98	2260.22	1957.57	2131.15	2142.86	1767.15	2147.24	2307.69	1761.71	2300.22	1779.32	1453.07	1955.42	1836.01	1805.02	2317.4	2350.99	1589.64	1825.57	2082.14	1797.47	2308.96	1282.3	2004.47	1366.91	1812.43	1658.9	1436.73	1841.29	1387.39	2204.72	1309.59	1776.45	2022.47	1814.78	2128.51	1423.15	1855.07	1388.89	1815.53	1519.51	2020.51	2374.33	1693.07	1712.28	2725.32
	10 days, 0:04:25	1395.76	1606.14	1790.07	2254.13	1755.52	1963.95	1506.44	2209.3	2162.95	2093.02	1633.86	1650.74	1499.56	1794.22	1255.69	1795.95	1837.29	1551.72	1476.27	1706.98	2197.35	1279.49	2901.55	1911.44	1875.56	1419.71	1315.35	1768.92	1734.35	2812.17	1676.07	1134.45	2509.92	1725.24	1734.69	1737.04	1797.23	1879.07	1563.67	2154.12	1151.37	1633.31	1675.98	1988.06	2565.49	1993.19	1915.06	1928.13
	10 days, 23:55:02	909.528	826.6	1110.57	983.34	1283.04	1208.9	861.965	1339.56	1103.9	1279.71	1105.83	1255.88	1273.79	757.248	914.902	1080.02	949.473	1187.35	1203.7	917.772	1079.91	1065.02	1552.65	2594.67	833.917	886.598	569.225	818.048	853.769	1564.56	887.178	1042.68	2004.12	816.417	831.055	1390.85	871.303	804.249	620.091	870.179	1023.82	712.566	1493.47	1509.97	1864.64	905.325	1436	1821.56
	00:00:00	?????	?????	?????	?????	?????	?????	?????	?????	?????	?????	?????	?????	?????	?????	?????	?????	?????	?????	?????	?????	?????	?????	?????	?????	?????	?????	?????	?????	?????	?????	?????	?????	?????	?????	?????	?????	?????	?????	?????	?????	?????	?????	?????	?????	?????	?????	?????	?????
	00:00:00	?????	?????	?????	?????	?????	?????	?????	?????	?????	?????	?????	?????	?????	?????	?????	?????	?????	?????	?????	?????	?????	?????	?????	?????	?????	?????	?????	?????	?????	?????	?????	?????	?????	?????	?????	?????	?????	?????	?????	?????	?????	?????	?????	?????	?????	?????	?????	?????
	00:00:00	?????	?????	?????	?????	?????	?????	?????	?????	?????	?????	?????	?????	?????	?????	?????	?????	?????	?????	?????	?????	?????	?????	?????	?????	?????	?????	?????	?????	?????	?????	?????	?????	?????	?????	?????	?????	?????	?????	?????	?????	?????	?????	?????	?????	?????	?????	?????	?????
	00:00:00	?????	?????	?????	?????	?????	?????	?????	?????	?????	?????	?????	?????	?????	?????	?????	?????	?????	?????	?????	?????	?????	?????	?????	?????	?????	?????	?????	?????	?????	?????	?????	?????	?????	?????	?????	?????	?????	?????	?????	?????	?????	?????	?????	?????	?????	?????	?????	?????
	00:00:00	?????	?????	?????	?????	?????	?????	?????	?????	?????	?????	?????	?????	?????	?????	?????	?????	?????	?????	?????	?????	?????	?????	?????	?????	?????	?????	?????	?????	?????	?????	?????	?????	?????	?????	?????	?????	?????	?????	?????	?????	?????	?????	?????	?????	?????	?????	?????	?????
	00:00:00	?????	?????	?????	?????	?????	?????	?????	?????	?????	?????	?????	?????	?????	?????	?????	?????	?????	?????	?????	?????	?????	?????	?????	?????	?????	?????	?????	?????	?????	?????	?????	?????	?????	?????	?????	?????	?????	?????	?????	?????	?????	?????	?????	?????	?????	?????	?????	?????
	00:00:00	?????	?????	?????	?????	?????	?????	?????	?????	?????	?????	?????	?????	?????	?????	?????	?????	?????	?????	?????	?????	?????	?????	?????	?????	?????	?????	?????	?????	?????	?????	?????	?????	?????	?????	?????	?????	?????	?????	?????	?????	?????	?????	?????	?????	?????	?????	?????	?????
	00:00:00	?????	?????	?????	?????	?????	?????	?????	?????	?????	?????	?????	?????	?????	?????	?????	?????	?????	?????	?????	?????	?????	?????	?????	?????	?????	?????	?????	?????	?????	?????	?????	?????	?????	?????	?????	?????	?????	?????	?????	?????	?????	?????	?????	?????	?????	?????	?????	?????
	00:00:00	?????	?????	?????	?????	?????	?????	?????	?????	?????	?????	?????	?????	?????	?????	?????	?????	?????	?????	?????	?????	?????	?????	?????	?????	?????	?????	?????	?????	?????	?????	?????	?????	?????	?????	?????	?????	?????	?????	?????	?????	?????	?????	?????	?????	?????	?????	?????	?????
	00:00:00	?????	?????	?????	?????	?????	?????	?????	?????	?????	?????	?????	?????	?????	?????	?????	?????	?????	?????	?????	?????	?????	?????	?????	?????	?????	?????	?????	?????	?????	?????	?????	?????	?????	?????	?????	?????	?????	?????	?????	?????	?????	?????	?????	?????	?????	?????	?????	?????
	00:00:00	?????	?????	?????	?????	?????	?????	?????	?????	?????	?????	?????	?????	?????	?????	?????	?????	?????	?????	?????	?????	?????	?????	?????	?????	?????	?????	?????	?????	?????	?????	?????	?????	?????	?????	?????	?????	?????	?????	?????	?????	?????	?????	?????	?????	?????	?????	?????	?????
[truncated: 49 more columns]

## Sheet: Plate 2 - mediumB_deltaC
Software Version	2001-09-02
Experiment File Path:	C:\Users\Public\Documents\Experiments\Bella\20190512_EE24.12.xpt
Protocol File Path:	C:\Users\Public\Documents\Protocols\Bella\EE22.prt
Plate Number	Plate 2
Date	2019-05-01
Time	10:18:08
Reader Type:	Synergy H1
Reader Serial Number:	266878
Reading Type	Reader
Procedure Details
Plate Type	Nunc 96 flat bottom generic
Discontinuous Kinetics	Runtime 22:00:00 (D:HH:MM), Interval 1:00:00, 23 Reads
	Pause after each run
Eject plate on completion
Shake	Double Orbital: 0:10 (MM:SS)
	Frequency: 365 cpm (2 mm)
Read	Absorbance Endpoint
	Full Plate
	Wavelengths: 600
	Read Speed: Sweep, Delay: 0 msec, Measurements/Data Point: 1
Shake	Linear: 0:02 (MM:SS)
	Frequency: 731 cpm (2 mm)
Read	Fluorescence Endpoint
	Full Plate
	Filter Set 1
	Excitation: 515, Emission: 545
	Optics: Top, Gain: 100
	Filter Set 2
	Excitation: 515, Emission: 545
	Optics: Top, Gain: 120
	Light Source: Xenon Flash, Lamp Energy: High
	Read Speed: Sweep, Delay: 0 msec, Measurements/Data Point: 1
	Read Height: 7 mm
Shake	Linear: 0:02 (MM:SS)
	Frequency: 731 cpm (2 mm)
Read	Fluorescence Endpoint
	Full Plate
	Filter Set 1
	Excitation: 425, Emission: 475
	Optics: Top, Gain: 100
	Filter Set 2
	Excitation: 425, Emission: 475
	Optics: Top, Gain: 60
	Light Source: Xenon Flash, Lamp Energy: High
	Read Speed: Sweep, Delay: 0 msec, Measurements/Data Point: 1
	Read Height: 7 mm
Layout
		1	2	3	4	5	6	7	8	9	10	11	12
	A	SPL1	SPL5	SPL9	SPL13	SPL17	SPL21	SPL25	SPL29	SPL33	SPL37	SPL44	SPL51	Well ID
	B	SPL2	SPL6	SPL10	SPL14	SPL18	SPL22	SPL26	SPL30	SPL34	SPL38	SPL45	SPL52	Well ID
	C	SPL3	SPL7	SPL11	SPL15	SPL19	SPL23	SPL27	SPL31	SPL35	SPL39	SPL46	SPL53	Well ID
	D	SPL4	SPL8	SPL12	SPL16	SPL20	BLK	BLK	SPL32	SPL36	SPL40	SPL47	SPL54	Well ID
	E	SPL58	SPL62	SPL66	SPL70	SPL74	SPL78	SPL82	SPL86	SPL90	SPL41	SPL48	SPL55	Well ID
	F	SPL59	SPL63	SPL67	SPL71	SPL75	SPL79	SPL83	SPL87	SPL91	SPL42	SPL49	SPL56	Well ID
	G	SPL60	SPL64	SPL68	SPL72	SPL76	SPL80	SPL84	SPL88	SPL92	SPL43	SPL50	SPL57	Well ID
	H	SPL61	SPL65	SPL69	SPL73	SPL77	BLK	BLK	SPL89	SPL93	SPL94	SPL95	SPL1	Well ID
Read 1:600
	Time	T° Read 1:600	A1	A2	A3	A4	A5	A6	A7	A8	A9	A10	A11	A12	B1	B2	B3	B4	B5	B6	B7	B8	B9	B10	B11	B12	C1	C2	C3	C4	C5	C6	C7	C8	C9	C10	C11	C12	D1	D2	D3	D4	D5	D6	D7	D8	D9	D10	D11
	00:00:11	36.1	0.165	0.135	0.129	0.142	0.144	0.153	0.157	0.156	0.166	0.192	0.209	0.271	0.135	0.134	0.153	0.17	0.21	0.216	0.197	0.23	0.236	0.226	0.249	0.222	0.137	0.155	0.181	0.182	0.26	0.206	0.272	0.275	0.268	0.285	0.247	0.197	0.149	0.135	0.207	0.265	0.278	0.278	0.271	0.296	0.295	0.279	0.215
	23:46:27	27	0.114	0.108	0.099	0.1	0.111	0.106	0.099	0.103	0.102	0.098	0.092	0.111	0.143	0.323	0.169	0.117	0.114	0.106	0.101	0.105	0.106	0.114	0.099	0.096	0.135	0.121	0.135	0.229	0.209	0.173	0.15	0.173	0.147	0.147	0.133	0.108	0.153	0.157	0.264	0.3	0.264	0.198	0.214	0.18	0.248	0.22	0.162
	1 day, 23:40:53	36.3	0.103	0.111	0.097	0.105	0.101	0.099	0.101	0.1	0.094	0.095	0.097	0.107	0.103	0.56	0.109	0.134	0.098	0.094	0.097	0.099	0.106	0.091	0.091	0.095	0.133	0.12	0.113	0.13	0.191	0.11	0.105	0.101	0.092	0.096	0.093	0.096	0.152	0.124	0.117	0.111	0.104	0.102	0.095	0.096	0.097	0.14	0.092
	3 days, 0:00:01	26.9	0.094	0.104	0.098	0.098	0.095	0.096	0.099	0.098	0.097	0.105	0.091	0.091	0.105	0.436	0.109	0.094	0.099	0.105	0.105	0.109	0.106	0.1	0.092	0.096	0.109	0.108	0.292	0.102	0.094	0.107	0.106	0.108	0.103	0.099	0.1	0.102	0.097	0.097	0.109	0.102	0.111	0.111	0.101	0.103	0.099	0.239	0.095
	3 days, 23:50:15	26.6	0.158	0.121	0.111	0.107	0.101	0.101	0.099	0.096	0.104	0.105	0.112	0.102	0.128	0.476	0.129	0.092	0.106	0.104	0.107	0.106	0.11	0.106	0.111	0.12	0.103	0.363	0.502	0.129	0.118	0.135	0.104	0.106	0.105	0.108	0.11	0.12	0.279	0.466	0.105	0.112	0.126	0.123	0.127	0.137	0.125	0.458	0.11
	4 days, 23:54:11	26.7	0.512	0.322	0.344	0.098	0.512	0.419	0.091	0.077	0.093	0.098	0.078	0.099	0.304	0.292	0.342	0.092	0.089	0.089	0.089	0.093	0.089	0.09	0.09	0.088	0.529	0.549	0.232	0.093	0.094	0.098	0.093	0.094	0.094	0.097	0.098	0.098	0.104	0.464	0.1	0.103	0.097	0.094	0.092	0.096	0.095	0.411	0.096
	5 days, 23:56:05	26.7	0.322	0.267	0.171	0.096	0.278	0.17	0.098	0.1	0.094	0.095	0.082	0.095	0.274	0.173	0.289	0.092	0.1	0.107	0.096	0.102	0.1	0.101	0.092	0.099	0.412	0.203	0.15	0.091	0.09	0.093	0.099	0.097	0.095	0.094	0.095	0.105	0.092	0.187	0.096	0.102	0.099	0.099	0.097	0.099	0.105	0.219	0.1
	7 days, 0:06:30	26.8	0.19	0.228	0.168	0.11	0.176	0.146	0.107	0.108	0.102	0.098	0.113	0.122	0.351	0.153	0.203	0.105	0.107	0.114	0.103	0.11	0.106	0.116	0.105	0.129	0.287	0.156	0.136	0.107	0.109	0.107	0.106	0.109	0.1	0.1	0.101	0.103	0.099	0.144	0.101	0.112	0.103	0.105	0.093	0.096	0.108	0.16	0.11
	8 days, 0:07:22	26.7	0.229	0.175	0.159	0.102	0.151	0.158	0.105	0.112	0.099	0.098	0.104	0.093	0.264	0.21	0.22	0.091	0.098	0.101	0.096	0.095	0.362	0.104	0.092	0.086	0.202	0.26	0.196	0.105	0.084	0.083	0.092	0.093	0.097	0.108	0.105	0.107	0.087	0.283	0.106	0.102	0.087	0.107	0.081	0.098	0.111	0.222	0.103
	8 days, 23:20:57	27.1	0.147	0.192	0.156	0.1	0.15	0.141	0.106	0.107	0.104	0.102	0.101	0.104	0.247	0.166	0.153	0.103	0.105	0.1	0.098	0.105	0.366	0.103	0.097	0.1	0.166	0.168	0.167	0.095	0.103	0.101	0.099	0.098	0.095	0.099	0.102	0.118	0.106	0.174	0.108	0.102	0.095	0.096	0.09	0.097	0.098	0.155	0.101
	10 days, 0:04:23	26.9	0.136	0.167	0.151	0.089	0.148	0.15	0.107	0.111	0.09	0.095	0.111	0.119	0.256	0.131	0.113	0.088	0.088	0.101	0.097	0.088	0.312	0.1	0.09	0.093	0.191	0.128	0.154	0.103	0.084	0.084	0.121	0.096	0.096	0.113	0.095	0.251	0.084	0.125	0.091	0.091	0.086	0.101	0.089	0.098	0.111	0.172	0.095
	10 days, 23:54:55	26.9	0.143	0.167	0.129	0.096	0.131	0.142	0.111	0.097	0.112	0.093	0.106	0.099	0.286	0.152	0.133	0.091	0.089	0.103	0.09	0.085	0.364	0.104	0.091	0.098	0.141	0.195	0.189	0.102	0.088	0.087	0.141	0.097	0.095	0.103	0.109	0.305	0.1	0.139	0.099	0.102	0.094	0.101	0.09	0.087	0.1	0.149	0.107
	00:00:00
	00:00:00
	00:00:00
	00:00:00
	00:00:00
	00:00:00
	00:00:00
	00:00:00
	00:00:00
	00:00:00
	00:00:00
Read 2:515,545
	Time	T° Read 2:515,545	A1	A2	A3	A4	A5	A6	A7	A8	A9	A10	A11	A12	B1	B2	B3	B4	B5	B6	B7	B8	B9	B10	B11	B12	C1	C2	C3	C4	C5	C6	C7	C8	C9	C10	C11	C12	D1	D2	D3	D4	D5	D6	D7	D8	D9	D10	D11
	00:00:03	36	244	173	191	135	194	218	181	284	266	153	244	236	262	287	156	223	208	162	194	266	261	201	262	215	257	217	177	274	172	292	208	277	379	176	252	255	172	212	206	143	232	225	212	197	250	233	136
	23:46:20	27	206	297	275	134	253	253	216	216	305	193	252	212	204	566	278	213	159	316	265	156	252	185	239	217	292	237	272	350	298	217	170	215	196	187	247	189	320	329	250	239	253	250	214	164	237	150	280
	1 day, 23:40:45	36.2	189	245	241	274	240	180	223	318	149	131	167	225	223	1733	241	191	184	213	179	195	115	156	169	260	216	215	214	215	185	169	184	265	102	157	164	227	216	229	223	226	267	259	140	144	169	243	159
	2 days, 23:59:54	26.9	140	200	205	135	185	244	146	206	200	203	248	250	183	1583	207	305	292	239	159	135	166	171	183	317	246	134	765	228	169	208	165	232	231	211	220	229	256	206	114	257	268	219	147	238	312	340	144
	3 days, 23:50:07	26.7	211	161	258	161	281	132	217	222	236	203	302	204	219	1656	168	194	189	219	236	205	221	223	224	266	257	1588	1416	151	230	260	223	240	186	276	200	296	131	2215	200	290	229	260	153	228	214	676	162
	4 days, 23:54:04	26.7	3516	1353	1795	223	3467	1885	234	233	268	230	161	148	1321	1118	1343	124	211	242	185	103	256	184	154	221	2226	2854	1267	192	256	307	223	196	139	184	210	197	250	2568	290	251	365	190	197	235	200	599	157
	5 days, 23:55:57	26.7	2148	1500	961	232	1763	1148	275	229	148	130	146	218	1739	838	2046	220	216	226	187	128	242	202	260	288	2769	1044	889	258	292	231	184	161	190	178	173	211	270	1452	252	187	270	238	204	249	157	650	223
	7 days, 0:06:22	26.8	900	1308	975	190	825	922	191	169	271	200	213	281	1897	733	1256	309	280	332	137	163	206	283	220	218	1674	639	698	278	229	217	257	146	208	227	192	253	194	818	214	187	261	238	222	191	198	594	230
	8 days, 0:07:14	26.7	1166	1016	774	209	973	1074	301	196	351	243	303	234	1558	741	1040	290	307	265	224	208	625	267	253	156	1262	1014	839	333	278	215	239	198	208	261	207	188	255	987	277	210	223	220	277	251	223	401	186
	8 days, 23:20:49	27.2	468	862	677	229	630	605	327	187	238	178	204	183	1264	659	620	179	222	238	178	179	560	238	256	167	640	720	695	156	203	246	112	248	276	184	160	294	216	811	209	152	313	241	238	191	188	357	202
	10 days, 0:04:16	26.9	746	975	611	211	752	895	228	192	291	235	207	157	1281	772	647	181	189	233	213	172	544	277	199	231	848	429	777	174	219	221	227	174	268	221	194	353	278	611	195	263	165	262	251	261	197	394	200
	10 days, 23:54:48	26.9	605	979	701	237	653	829	262	182	224	158	210	236	1571	1026	795	207	203	224	230	239	846	242	102	278	840	939	850	213	208	219	227	229	226	189	250	505	148	638	226	251	178	201	308	167	234	524	196
	00:00:00
	00:00:00
	00:00:00
	00:00:00
	00:00:00
	00:00:00
	00:00:00
	00:00:00
	00:00:00
	00:00:00
	00:00:00
Read 2:515,545[2]
	Time	T° Read 2:515,545[2]	A1	A2	A3	A4	A5	A6	A7	A8	A9	A10	A11	A12	B1	B2	B3	B4	B5	B6	B7	B8	B9	B10	B11	B12	C1	C2	C3	C4	C5	C6	C7	C8	C9	C10	C11	C12	D1	D2	D3	D4	D5	D6	D7	D8	D9	D10	D11
	00:00:15	36	901	847	804	783	1088	754	957	823	841	1044	692	896	790	755	663	936	795	973	801	852	1160	747	885	841	1036	824	1220	817	1095	1106	920	930	856	974	913	984	905	908	1066	926	849	824	988	1202	856	803	716
	23:46:32	27	1097	1097	1075	839	961	892	918	688	1033	926	644	963	846	2258	1245	678	816	991	1104	946	974	1049	677	896	894	1082	1058	984	948	958	841	1071	956	798	999	1186	1191	1071	817	1093	1087	910	700	794	1216	1006	788
	1 day, 23:40:57	36.2	1179	721	932	782	778	875	990	821	922	742	458	735	760	6508	889	540	972	1164	788	701	629	609	1070	852	834	879	807	740	935	740	987	814	935	899	572	975	1042	865	861	1063	764	748	771	769	1056	763	770
	3 days, 0:00:06	26.9	600	698	1073	740	741	846	816	982	963	706	604	940	804	6180	837	952	772	711	940	748	851	894	718	806	727	775	2262	896	971	757	1090	648	1127	680	1064	823	910	985	525	910	881	862	929	863	1021	1033	847
	3 days, 23:50:19	26.7	511	731	686	878	836	849	1033	767	606	993	791	1053	990	7245	964	949	945	750	844	1010	1023	1019	1078	1087	773	7176	5951	892	745	880	1087	831	1014	1044	994	997	854	10557	1181	683	1068	844	989	1060	823	2785	750
	4 days, 23:54:16	26.7	14654	5924	5768	834	13459	7840	895	937	730	1086	1125	897	4883	4644	4905	615	357	1000	855	814	852	653	772	903	8335	11148	5025	637	797	1000	1009	723	873	786	849	879	1272	11226	1111	849	1116	838	868	970	967	2486	753
	5 days, 23:56:09	26.7	9201	7352	4976	1097	6687	4350	1017	764	549	859	640	760	7325	3383	7680	1034	1025	920	963	874	1068	1035	893	887	11446	4057	3121	928	974	1167	978	652	813	692	902	859	1131	5968	846	792	1039	1139	926	896	1043	2487	656
	7 days, 0:06:34	26.8	4100	6060	3748	1105	3432	3869	933	741	863	1215	913	844	8064	3105	4311	1072	1082	799	849	967	1083	513	1017	950	5842	3063	3047	982	1040	975	1141	1026	1360	1207	929	1035	964	3344	952	842	1023	737	771	1014	934	1944	944
	8 days, 0:07:26	26.7	5575	4878	4030	800	3935	4082	807	913	738	899	1085	681	5636	3940	3806	1062	742	766	1112	828	2891	1084	860	929	4923	4741	3804	615	869	937	849	906	927	1006	1116	623	892	3533	805	919	924	923	843	803	990	2431	864
	8 days, 23:21:01	27.2	3197	3710	2690	822	2396	2524	834	600	958	1002	889	512	3796	2805	3228	747	947	817	764	856	2582	972	853	921	2730	3001	3117	739	917	876	891	575	1131	598	972	1109	980	3037	900	629	716	826	945	1018	624	1692	835
	10 days, 0:04:28	26.9	2675	3422	2763	844	2971	2923	775	619	821	644	812	787	5546	3094	2578	874	761	752	700	912	3428	863	910	656	4004	2229	2271	1036	878	718	945	1185	749	781	909	1481	707	1945	790	835	997	788	846	584	724	2001	684
	10 days, 23:55:00	26.9	2846	4340	2317	971	2482	3565	931	831	954	903	813	932	7258	4045	3167	872	773	886	963	790	3611	985	754	926	3628	3340	3403	1019	877	929	1006	849	1117	867	1011	2313	908	3753	1041	1122	1015	1155	1050	716	1084	2444	962
	00:00:00
	00:00:00
	00:00:00
	00:00:00
	00:00:00
	00:00:00
	00:00:00
	00:00:00
	00:00:00
	00:00:00
	00:00:00
Read 3:425,475
	Time	T° Read 3:425,475	A1	A2	A3	A4	A5	A6	A7	A8	A9	A10	A11	A12	B1	B2	B3	B4	B5	B6	B7	B8	B9	B10	B11	B12	C1	C2	C3	C4	C5	C6	C7	C8	C9	C10	C11	C12	D1	D2	D3	D4	D5	D6	D7	D8	D9	D10	D11
	00:00:03	35.9	9548	8995	8030	9563	9271	8999	8630	8549	9702	9960	10068	11650	10116	10940	10333	10709	10675	12218	12140	11673	11447	11510	11019	9375	10969	11308	10698	10770	11828	11763	11954	11715	12061	10573	10367	9510	10408	10892	12071	11684	10308	11793	11934	11940	9990	9843	8921
	23:46:19	27	8930	9259	8703	7633	8213	8775	7980	7740	7911	7934	7573	8170	10172	16167	9915	8022	8961	8667	8353	8150	7853	7780	7570	7543	10428	10897	10924	10902	10621	10077	9272	9332	8934	8343	7948	7917	10510	11034	11129	10040	8797	8213	7727	7660	8194	8553	7686
	1 day, 23:40:45	36.1	7943	7584	6993	7748	7232	7447	7179	6734	6981	7558	7218	7055	7636	22695	7355	7658	7436	6811	7025	7370	7404	6740	6755	7256	8256	7378	7405	7390	8533	6805	7267	6766	6903	7031	7216	7815	7901	7586	7432	7157	6696	6941	6543	6611	7017	7846	6710
	2 days, 23:59:54	26.9	6423	7632	8536	8891	8377	8926	8818	8830	8459	8387	8284	9745	7112	19627	8363	8452	8476	8497	7943	8934	9266	9053	8593	9069	7082	7209	14516	8442	9140	9300	8298	8446	8429	8308	8423	9198	7297	8450	7310	8856	8755	9040	8601	8718	8149	11342	8131
	3 days, 23:50:07	26.7	4367	6342	6198	6511	6255	6365	7041	6324	7610	7877	7946	7276	7689	18460	6272	7059	7688	6815	7195	7691	7204	7770	7655	8810	6665	18290	17102	8163	7762	7922	8123	7985	8131	7870	7978	8706	8224	24262	7801	7512	8033	8507	7876	7933	8309	21751	7589
	4 days, 23:54:03	26.7	25653	18885	17250	8561	23713	20837	7406	7445	8433	9204	8218	9972	15397	12536	16938	6064	5919	5804	5661	6358	6374	5977	5644	7665	21548	21318	12118	7513	8818	8514	8223	8530	8122	8404	8463	10403	7731	20256	6809	8038	8706	8049	8971	7909	7686	21007	8647
	5 days, 23:55:57	26.7	17157	15858	12551	8929	16463	12469	6927	6367	6028	6323	5369	5912	17298	13338	16591	8752	8874	7631	8111	9266	9183	8569	7960	9577	23321	13855	11798	7943	9324	8862	8152	8411	8077	8419	8204	8670	8982	15324	7662	7587	9089	8006	8415	7784	7575	19084	6572
	7 days, 0:06:22	26.9	13317	15174	13266	8464	12924	12717	8112	6644	7672	8583	7181	7926	17450	12339	14811	7889	8141	7136	7820	8060	8816	7129	8363	9125	16659	13221	12343	7269	8526	8744	7486	7751	8019	8235	8252	8463	7784	12640	7002	6951	8445	7290	8193	8764	6973	16605	7431
	8 days, 0:07:14	26.7	17265	15870	14345	9761	15961	15102	9132	9386	9677	10569	9136	10822	17509	14751	15919	9889	10025	8566	9372	9762	29780	9067	10616	11056	16012	18070	14809	8403	9879	9782	9546	9051	9891	9198	9505	10705	9572	16334	9067	9038	10115	9075	9170	10856	8955	20510	9262
	8 days, 23:20:49	27.2	13740	14881	12760	10067	13351	14082	8533	8329	8523	9020	8196	9552	16527	12963	13785	9841	9949	8323	8985	9703	30639	8658	9137	10053	14037	16043	14592	7783	9968	9726	8800	9120	9230	8480	8980	11844	9618	14327	8281	8544	9984	8200	10170	10055	8252	17963	8209
	10 days, 0:04:15	26.9	13723	13740	12762	9524	15483	14642	8787	8588	9329	9701	8877	10249	16879	13354	12414	9488	9833	8754	9393	9967	29128	8521	10423	10817	15731	13372	14024	8219	9756	9525	9450	9512	9568	8434	8344	24184	8517	12918	8171	8744	9656	8297	9548	9969	8454	18284	8688
	10 days, 23:54:48	26.9	12818	13876	11587	8819	13196	13227	7799	8180	8721	9044	7979	9408	16118	12921	13104	8298	9082	7306	7646	8721	29330	6941	8545	9169	14182	13865	14724	7129	9650	9266	8134	8225	8987	7204	9041	26268	9454	14553	6728	7646	9170	7136	8871	9162	8034	17714	7042
	00:00:00
	00:00:00
	00:00:00
	00:00:00
	00:00:00
	00:00:00
	00:00:00
	00:00:00
	00:00:00
	00:00:00
	00:00:00
Read 3:425,475[2]
	Time	T° Read 3:425,475[2]	A1	A2	A3	A4	A5	A6	A7	A8	A9	A10	A11	A12	B1	B2	B3	B4	B5	B6	B7	B8	B9	B10	B11	B12	C1	C2	C3	C4	C5	C6	C7	C8	C9	C10	C11	C12	D1	D2	D3	D4	D5	D6	D7	D8	D9	D10	D11
	00:00:15	35.9	252	251	240	233	204	267	215	246	252	218	213	229	255	248	222	235	302	241	360	222	288	270	280	243	252	236	296	249	303	245	286	333	282	219	238	190	278	260	331	290	214	312	282	242	213	252	243
	23:46:31	27	194	204	166	136	214	255	217	166	192	228	228	171	265	341	210	201	196	252	169	245	189	218	217	169	223	303	249	291	221	247	227	204	234	213	165	209	279	265	250	241	250	165	258	159	208	178	166
	1 day, 23:40:57	36.1	224	184	122	201	209	157	159	219	133	184	211	154	164	512	160	159	134	198	182	143	220	191	147	170	169	169	234	158	178	142	151	161	157	156	189	187	225	216	146	188	191	198	157	165	175	179	134
	3 days, 0:00:06	26.9	148	241	175	232	194	205	170	170	277	241	274	227	212	476	204	174	194	248	186	213	258	222	184	264	209	203	358	264	192	163	172	200	212	251	238	218	163	173	154	196	183	185	258	220	213	316	180
	3 days, 23:50:19	26.7	80	185	173	116	120	166	167	203	178	182	148	119	176	471	142	148	187	174	172	221	212	211	164	177	216	473	448	135	189	245	224	157	203	195	212	206	235	610	199	175	155	164	234	233	146	467	177
	4 days, 23:54:15	26.7	647	509	365	254	579	492	192	218	225	177	153	219	417	291	425	112	164	106	164	180	174	143	117	212	513	484	276	247	251	221	224	143	192	223	225	269	193	494	145	118	236	224	180	194	211	487	173
	5 days, 23:56:09	26.7	427	357	338	238	403	357	181	139	157	199	160	145	485	327	434	238	221	146	251	234	195	227	221	225	597	349	258	147	232	264	246	161	227	226	171	257	221	358	171	210	214	187	215	228	199	465	188
	7 days, 0:06:34	26.9	335	349	359	236	350	273	173	208	177	154	192	221	461	321	375	230	225	135	166	184	185	154	223	194	401	331	289	199	240	202	204	195	220	187	222	148	190	282	184	192	186	141	180	230	169	394	174
	8 days, 0:07:26	26.7	475	354	409	276	352	338	201	238	257	270	231	291	402	363	339	250	233	186	203	213	682	189	223	242	351	445	391	175	221	229	209	275	273	205	186	286	282	473	201	192	195	201	222	226	224	550	215
	8 days, 23:21:01	27.2	309	386	351	182	361	306	188	223	188	239	183	268	386	299	331	201	223	200	233	227	721	178	256	235	401	355	397	184	233	197	201	194	216	206	243	263	240	324	229	222	229	236	252	230	202	426	232
	10 days, 0:04:27	26.9	354	299	305	244	302	316	222	193	193	199	217	277	371	333	285	270	259	198	183	196	718	242	232	243	326	325	350	189	275	230	202	263	188	185	230	598	202	320	211	175	308	215	233	269	214	410	211
	10 days, 23:55:00	26.9	378	338	329	235	287	392	179	184	190	196	168	255	412	270	311	214	194	209	195	231	702	201	181	275	311	333	374	165	207	304	222	212	197	149	228	628	232	330	198	133	258	176	237	211	191	433	203
	00:00:00
	00:00:00
	00:00:00
	00:00:00
	00:00:00
	00:00:00
	00:00:00
	00:00:00
	00:00:00
	00:00:00
	00:00:00
Ratio yfp od
	Time	A1	A2	A3	A4	A5	A6	A7	A8	A9	A10	A11	A12	B1	B2	B3	B4	B5	B6	B7	B8	B9	B10	B11	B12	C1	C2	C3	C4	C5	C6	C7	C8	C9	C10	C11	C12	D1	D2	D3	D4	D5	D6	D7	D8	D9	D10	D11	D12
	00:00:03	1477	1277.7	1481.77	948.034	1344.42	1429.51	1155.81	1826.37	1600.48	795.632	1166.91	871.492	1937.87	2146.6	1021.61	1310.99	989.534	751.74	987.277	1159.04	1107.34	888.202	1051.36	966.727	1871.81	1404.53	979.524	1507.98	661.284	1420.23	765.832	1009.11	1414.71	617.761	1021.9	1296.39	1152.82	1568.05	997.096	540.643	834.833	808.771	781.999	665.765	848.033	836.324	633.147	1105.69
	23:46:20	1802.28	2752.55	2772.18	1345.38	2279.28	2377.82	2188.45	2099.12	2999.02	1965.38	2736.16	1918.55	1421.6	1750.15	1642.06	1823.63	1392.29	2969.93	2631.58	1487.13	2379.6	1629.96	2414.14	2265.14	2166.17	1957.06	2011.83	1528.38	1427.89	1252.16	1136.36	1244.21	1331.52	1275.58	1859.94	1758.14	2095.61	2096.88	947.329	796.932	957.97	1260.08	999.066	910.605	954.491	681.508	1731.6	2139.35
	1 day, 23:40:45	1836.73	2199.28	2474.33	2617	2369.2	1823.71	2218.91	3170.49	1585.11	1376.05	1728.78	2108.72	2154.59	3097.41	2211.01	1430.71	1885.25	2270.79	1845.36	1973.68	1080.83	1708.65	1861.23	2745.51	1625.28	1790.17	1892.13	1648.77	967.573	1537.76	1755.72	2618.58	1113.54	1633.71	1757.77	2359.67	1419.18	1854.25	1902.73	2037.87	2572.25	2551.72	1472.13	1495.33	1745.87	1736.95	1735.81	1609.81
	2 days, 23:59:54	1487.78	1926.78	2096.11	1377.55	1949.42	2549.63	1480.73	2112.82	2055.5	1942.58	2728.27	2753.3	1742.86	3627.41	1893.87	3237.79	2937.63	2284.89	1509.97	1243.09	1573.46	1718.59	1986.97	3295.22	2248.63	1236.16	2622.56	2226.56	1794.06	1953.05	1559.55	2146.16	2240.54	2127.02	2208.84	2249.51	2639.18	2119.34	1043.96	2527.04	2416.59	1969.42	1455.45	2308.44	3151.51	1420.22	1520.59	1238.84
	3 days, 23:50:07	1337.98	1326.19	2318.06	1511.74	2796.02	1308.23	2185.3	2305.3	2277.99	1933.33	2708.52	1990.24	1709.6	3476.07	1301.32	2099.57	1784.7	2107.8	2201.49	1930.32	2003.63	2103.77	2023.49	2212.98	2495.15	4368.64	2817.91	1173.27	1954.12	1930.21	2138.06	2257.76	1778.2	2560.3	1821.49	2458.47	469.871	4751.18	1897.53	2589.29	1823.25	2112.1	1202.83	1663.02	1714.74	1476.31	1472.73	2279.03
	4 days, 23:54:04	6863.17	4199.26	5221.06	2273.19	6764.88	4499.88	2557.38	3041.78	2891.05	2342.16	2066.75	1491.93	4348.26	3823.53	3923.46	1344.9	2381.49	2719.1	2080.99	1105.15	2860.34	2033.15	1701.66	2508.51	4207.14	5201.39	5456.5	2068.97	2714.74	3126.27	2400.43	2087.33	1474.02	1889.12	2140.67	2012.26	2396.93	5532.1	2891.33	2432.17	3755.14	2014.85	2132.03	2455.59	2114.16	1456	1635.42	2032.61
	5 days, 23:55:57	6670.81	5628.52	5633.06	2416.67	6337.17	6764.88	2806.12	2294.59	1581.2	1372.76	1776.16	2304.44	6353.67	4843.93	7072.24	2396.51	2166.5	2120.07	1958.12	1253.67	2417.58	2007.95	2826.09	2897.38	6720.87	5142.86	5934.58	2822.76	3233.67	2481.2	1864.23	1664.94	2002.11	1891.61	1819.14	2017.21	2925.24	7756.41	2622.27	1836.93	2730.03	2408.91	2094.46	2517.7	1499.52	2966.68	2225.55	2530.8
	7 days, 0:06:22	4734.35	5739.36	5796.67	1727.27	4692.83	6293.52	1778.4	1563.37	2659.47	2034.59	1883.29	2297.63	5406.1	4806.56	6196.35	2945.66	2621.72	2912.28	1333.98	1477.79	1941.57	2450.22	2087.29	1686	5836.82	4090.91	5117.3	2595.7	2110.6	2031.84	2426.82	1337	2090.45	2281.41	1902.87	2451.55	1963.56	5664.82	2112.54	1677.13	2541.38	2270.99	2381.97	1987.51	1829.94	3721.8	2085.22	2443
	8 days, 0:07:14	5091.7	5819.02	4877.13	2045.01	6443.71	6784.59	2866.67	1745.33	3534.74	2489.75	2910.66	2521.55	5908.23	3530.25	4725.12	3197.35	3148.72	2623.76	2343.1	2184.87	1727.95	2559.92	2750	1811.85	6247.52	3900	4282.8	3186.6	3313.47	2599.76	2600.65	2138.23	2137.72	2423.4	1967.68	1760.3	2934.41	3483.94	2625.59	2054.8	2569.12	2065.73	3419.75	2563.84	2010.82	1808.75	1797.1	1501.77
	8 days, 23:20:49	3177.19	4480.25	4336.96	2287.71	4208.42	4299.93	3073.31	1742.78	2295.08	1743.39	2023.81	1754.55	5109.14	3972.27	4060.25	1739.55	2124.4	2370.52	1818.18	1708.02	1530.89	2312.93	2636.46	1676.71	3864.73	4275.53	4154.21	1638.65	1978.56	2447.76	1130.17	2538.38	2908.32	1864.23	1570.17	2497.88	2039.66	4668.97	1938.78	1482.93	3284.36	2505.2	2632.74	1973.14	1928.2	2301.74	2007.95	1105.82
	10 days, 0:04:16	5473.22	5855.86	4051.72	2370.79	5084.52	5966.67	2122.91	1734.42	3219.03	2481.52	1863.19	1322.66	5005.86	5888.64	5720.6	2054.48	2157.53	2306.93	2200.41	1952.33	1743.03	2781.12	2203.76	2478.54	4442.12	3341.12	5048.73	1690.96	2600.95	2627.82	1872.94	1810.61	2794.58	1948.85	2033.54	1406.38	3305.59	4872.41	2131.15	2880.61	1923.08	2588.93	2829.76	2655.14	1782.81	2286.71	2109.7	2713.63
	10 days, 23:54:48	4233.73	5848.27	5425.7	2471.32	4977.13	5829.82	2351.89	1882.11	2005.37	1695.28	1979.27	2374.24	5489.17	6767.81	5981.94	2272.23	2291.2	2168.44	2564.1	2811.76	2320.99	2326.92	1122.11	2833.84	5953.23	4827.76	4509.28	2090.28	2355.61	2511.47	1605.38	2365.7	2381.45	1831.39	2291.48	1655.74	1485.94	4583.33	2280.53	2463.2	1895.63	1990.1	3426.03	1910.76	2337.66	3516.78	1838.65	2000
	00:00:00	?????	?????	?????	?????	?????	?????	?????	?????	?????	?????	?????	?????	?????	?????	?????	?????	?????	?????	?????	?????	?????	?????	?????	?????	?????	?????	?????	?????	?????	?????	?????	?????	?????	?????	?????	?????	?????	?????	?????	?????	?????	?????	?????	?????	?????	?????	?????	?????
	00:00:00	?????	?????	?????	?????	?????	?????	?????	?????	?????	?????	?????	?????	?????	?????	?????	?????	?????	?????	?????	?????	?????	?????	?????	?????	?????	?????	?????	?????	?????	?????	?????	?????	?????	?????	?????	?????	?????	?????	?????	?????	?????	?????	?????	?????	?????	?????	?????	?????
	00:00:00	?????	?????	?????	?????	?????	?????	?????	?????	?????	?????	?????	?????	?????	?????	?????	?????	?????	?????	?????	?????	?????	?????	?????	?????	?????	?????	?????	?????	?????	?????	?????	?????	?????	?????	?????	?????	?????	?????	?????	?????	?????	?????	?????	?????	?????	?????	?????	?????
	00:00:00	?????	?????	?????	?????	?????	?????	?????	?????	?????	?????	?????	?????	?????	?????	?????	?????	?????	?????	?????	?????	?????	?????	?????	?????	?????	?????	?????	?????	?????	?????	?????	?????	?????	?????	?????	?????	?????	?????	?????	?????	?????	?????	?????	?????	?????	?????	?????	?????
	00:00:00	?????	?????	?????	?????	?????	?????	?????	?????	?????	?????	?????	?????	?????	?????	?????	?????	?????	?????	?????	?????	?????	?????	?????	?????	?????	?????	?????	?????	?????	?????	?????	?????	?????	?????	?????	?????	?????	?????	?????	?????	?????	?????	?????	?????	?????	?????	?????	?????
	00:00:00	?????	?????	?????	?????	?????	?????	?????	?????	?????	?????	?????	?????	?????	?????	?????	?????	?????	?????	?????	?????	?????	?????	?????	?????	?????	?????	?????	?????	?????	?????	?????	?????	?????	?????	?????	?????	?????	?????	?????	?????	?????	?????	?????	?????	?????	?????	?????	?????
	00:00:00	?????	?????	?????	?????	?????	?????	?????	?????	?????	?????	?????	?????	?????	?????	?????	?????	?????	?????	?????	?????	?????	?????	?????	?????	?????	?????	?????	?????	?????	?????	?????	?????	?????	?????	?????	?????	?????	?????	?????	?????	?????	?????	?????	?????	?????	?????	?????	?????
	00:00:00	?????	?????	?????	?????	?????	?????	?????	?????	?????	?????	?????	?????	?????	?????	?????	?????	?????	?????	?????	?????	?????	?????	?????	?????	?????	?????	?????	?????	?????	?????	?????	?????	?????	?????	?????	?????	?????	?????	?????	?????	?????	?????	?????	?????	?????	?????	?????	?????
	00:00:00	?????	?????	?????	?????	?????	?????	?????	?????	?????	?????	?????	?????	?????	?????	?????	?????	?????	?????	?????	?????	?????	?????	?????	?????	?????	?????	?????	?????	?????	?????	?????	?????	?????	?????	?????	?????	?????	?????	?????	?????	?????	?????	?????	?????	?????	?????	?????	?????
	00:00:00	?????	?????	?????	?????	?????	?????	?????	?????	?????	?????	?????	?????	?????	?????	?????	?????	?????	?????	?????	?????	?????	?????	?????	?????	?????	?????	?????	?????	?????	?????	?????	?????	?????	?????	?????	?????	?????	?????	?????	?????	?????	?????	?????	?????	?????	?????	?????	?????
	00:00:00	?????	?????	?????	?????	?????	?????	?????	?????	?????	?????	?????	?????	?????	?????	?????	?????	?????	?????	?????	?????	?????	?????	?????	?????	?????	?????	?????	?????	?????	?????	?????	?????	?????	?????	?????	?????	?????	?????	?????	?????	?????	?????	?????	?????	?????	?????	?????	?????
Ratio cfp od
	Time	A1	A2	A3	A4	A5	A6	A7	A8	A9	A10	A11	A12	B1	B2	B3	B4	B5	B6	B7	B8	B9	B10	B11	B12	C1	C2	C3	C4	C5	C6	C7	C8	C9	C10	C11	C12	D1	D2	D3	D4	D5	D6	D7	D8	D9	D10	D11	D12
	00:00:03	57796.6	66432.8	62296.4	67155.9	64248.1	59009.8	55108.6	54977.5	58375.5	51794.1	48149.2	43020.7	74822.5	81825	67668.6	62957.1	50785	56696.1	61781.2	50862.7	48566	50861.7	44217.5	42153.8	79890.8	73190.9	59203.1	59273.5	45474.8	57213	44013.3	42677.6	45020.5	37111.3	42039.7	48347.7	69758.7	80562.1	58426.9	44173.9	37092.5	42390.4	44020.7	40351.5	33887.4	35330.2	41531.7	50959.3
	23:46:19	78127.7	85810.9	87731.9	76636.5	73991	82471.8	80851.1	75218.7	77787.6	80794.3	82225.8	73936.7	70885	49990.7	58564.7	68681.5	78467.6	81456.8	82949.4	77693	74154.9	68546.3	76464.6	78737	77359.1	89983.5	80798.8	47607	50891.2	58147.7	61978.6	54004.6	60692.9	56910	59849.4	73646.5	68827.8	70325	42171.3	33477.8	33309.4	41396.2	36073.8	42531.9	33000.4	38859.6	47532.5	78528
	1 day, 23:40:45	77191.4	68079	71796.7	74001.9	71391.9	75450.9	71432.8	67138.6	74266	79390.8	74720.5	66120	73777.8	40563	67477.1	57363.3	76188.5	72611.9	72422.7	74595.1	69586.5	73822.6	74394.3	76620.9	62121.9	61432.1	65473	56671.8	44628.7	61919.9	69341.6	66857.7	75360.3	73163.4	77341.9	81237	51912	61425.1	63413	64535.6	64508.7	68384.2	68801.3	68650.1	72489.7	56082.9	73253.3	79221.7
	2 days, 23:59:54	68257.2	73526	87280.2	90724.5	88271.9	93270.6	89432	90564.1	86937.3	80258.4	91133.1	107324	67733.3	44974.8	76514.2	89724	85271.6	81233.3	75432.1	82265.2	87829.4	90984.9	93300.8	94272.3	64734.9	66503.7	49763.5	82441.4	97027.6	87323.9	78431	78131.4	81755.6	83750	84568.3	90353.6	75226.8	86934.2	66941.4	87079.6	78945	81295	85158.4	84558.7	82313.1	47376.8	85860.6	97165.2
	3 days, 23:50:07	27691.8	52240.5	55687.3	61136.2	62238.8	63082.3	70906.3	65669.8	73455.6	75019	71264.6	70985.4	60023.4	38748.9	48582.5	76396.1	72596.8	65591.9	67117.5	72420	65312.8	73301.9	69150.9	73294.5	64708.7	50316.4	34033.8	63426.6	65947.3	58812.2	77881.1	75117.6	77734.2	73005.6	72659.4	72309	29497.8	52042	74013.3	67071.4	63957	69106.4	61918.2	57862.9	66578.5	47501.6	68990.9	70901.2
	4 days, 23:54:03	50074.2	58612.7	50174.5	87268.1	46269.3	49742.2	80939.9	97193.2	90970.9	93727.1	105494	100524	50681.4	42872.8	49482.9	65770.1	66805.9	65213.5	63678.3	68218.9	71217.9	66044.2	62364.6	87003.4	40725.8	38851.8	52187.8	80959.1	93510.1	86700.6	88514.5	90841.3	86129.4	86283.4	86269.1	106261	74122.7	43636.4	67886.3	77887.6	89567.9	85355.2	97088.7	82643.7	81247.4	51062.2	90072.9	103370
	5 days, 23:55:57	53282.6	59504.7	73569.8	93010.4	59176.9	73476.7	70683.7	63797.6	64401.7	66768.7	65316.3	62494.7	63200.6	77098.3	57348.8	95337.7	89007	71585.4	84931.9	90754.2	91738.3	85178.9	86521.7	96348.1	56604.4	68251.2	78758.3	86903.7	103256	95188	82593.7	86980.4	85110.6	89468.6	86267.1	82887.2	97313.1	81859	79729.4	74528.5	91900.9	81032.4	86396.3	78705.8	72349.6	87101.8	65588.8	90951.8
	7 days, 0:06:22	70052.6	66581.8	78870.4	76945.5	73515.4	86805.5	75530.7	61461.6	75289.5	87314.3	63492.5	64807.8	49729.3	80911.5	73068.6	75205	76226.6	62596.5	76144.1	73073.4	83091.4	61722.9	79345.4	70572.3	58085.8	84641.5	90491.2	67871.1	78580.6	81872.7	70689.3	70979.9	80593	82763.8	81783.9	82005.8	78785.4	87534.6	69121.4	62340.8	82229.8	69561.1	87907.7	91196.7	64445.5	104041	67370.8	93224.8
	8 days, 0:07:14	75393	90893.5	90390.7	95508.8	105702	95401.1	86971.4	83579.7	97452.2	108289	87761.8	116616	66397.4	70276.3	72326.2	109030	102821	84811.9	98033.5	102542	82333.4	86931.9	115391	128409	79267.3	69500	75594.7	80411.5	117747	118283	103874	97743	101655	85403.9	90351.7	100234	110150	57656.2	85943.1	88434.4	116532	85211.3	113210	110889	80748.4	92512.4	89487.9	97500
	8 days, 23:20:49	93279	77344.1	81742.5	100569	89185	100085	80197.4	77623.5	82189	88344.8	81309.5	91582	66802.7	78137.4	90275	95636.5	95205.7	82898.4	91777.3	92585.9	83758.9	84139.9	94098.9	100934	84764.5	95267.2	87220.6	81754.2	97154	96776.1	88799.2	93347	97260.3	85916.9	88125.6	100629	90821.5	82481.3	76818.2	83356.1	104764	85239.1	112500	103874	84635.9	115816	81600.4	96396.6
	10 days, 0:04:15	100682	82522.5	84628.6	107011	104686	97613.3	81815.6	77579	103197	102439	79901	86343.7	65959.4	101861	109761	107696	112249	86673.3	97035.1	113133	93329.1	85552.2	115426	116062	82404.4	104143	91124.1	79873.7	115867	113258	77970.3	98980.2	99770.6	74373.9	87463.3	96350.6	101272	103014	89300.5	95772.2	112541	81986.2	107644	101414	76506.8	106117	91645.6	120242
	10 days, 23:54:48	89699.1	82891.3	89682.7	91960.4	100579	93016.9	70009	84591.5	78075.2	97038.6	75202.6	94647.9	56317.3	85230.9	98600.5	91086.7	102506	70726	85239.7	102600	80466.4	66740.4	94004.4	93465.9	100510	71285.3	78111.4	69960.7	109287	106261	57524.8	84969	94699.7	69806.2	82868.9	86124.6	94919.7	104547	67891	75034.3	97657.1	70653.5	98676.3	104828	80259.7	118886	66060	94756.5
	00:00:00	?????	?????	?????	?????	?????	?????	?????	?????	?????	?????	?????	?????	?????	?????	?????	?????	?????	?????	?????	?????	?????	?????	?????	?????	?????	?????	?????	?????	?????	?????	?????	?????	?????	?????	?????	?????	?????	?????	?????	?????	?????	?????	?????	?????	?????	?????	?????	?????
	00:00:00	?????	?????	?????	?????	?????	?????	?????	?????	?????	?????	?????	?????	?????	?????	?????	?????	?????	?????	?????	?????	?????	?????	?????	?????	?????	?????	?????	?????	?????	?????	?????	?????	?????	?????	?????	?????	?????	?????	?????	?????	?????	?????	?????	?????	?????	?????	?????	?????
	00:00:00	?????	?????	?????	?????	?????	?????	?????	?????	?????	?????	?????	?????	?????	?????	?????	?????	?????	?????	?????	?????	?????	?????	?????	?????	?????	?????	?????	?????	?????	?????	?????	?????	?????	?????	?????	?????	?????	?????	?????	?????	?????	?????	?????	?????	?????	?????	?????	?????
	00:00:00	?????	?????	?????	?????	?????	?????	?????	?????	?????	?????	?????	?????	?????	?????	?????	?????	?????	?????	?????	?????	?????	?????	?????	?????	?????	?????	?????	?????	?????	?????	?????	?????	?????	?????	?????	?????	?????	?????	?????	?????	?????	?????	?????	?????	?????	?????	?????	?????
	00:00:00	?????	?????	?????	?????	?????	?????	?????	?????	?????	?????	?????	?????	?????	?????	?????	?????	?????	?????	?????	?????	?????	?????	?????	?????	?????	?????	?????	?????	?????	?????	?????	?????	?????	?????	?????	?????	?????	?????	?????	?????	?????	?????	?????	?????	?????	?????	?????	?????
	00:00:00	?????	?????	?????	?????	?????	?????	?????	?????	?????	?????	?????	?????	?????	?????	?????	?????	?????	?????	?????	?????	?????	?????	?????	?????	?????	?????	?????	?????	?????	?????	?????	?????	?????	?????	?????	?????	?????	?????	?????	?????	?????	?????	?????	?????	?????	?????	?????	?????
	00:00:00	?????	?????	?????	?????	?????	?????	?????	?????	?????	?????	?????	?????	?????	?????	?????	?????	?????	?????	?????	?????	?????	?????	?????	?????	?????	?????	?????	?????	?????	?????	?????	?????	?????	?????	?????	?????	?????	?????	?????	?????	?????	?????	?????	?????	?????	?????	?????	?????
	00:00:00	?????	?????	?????	?????	?????	?????	?????	?????	?????	?????	?????	?????	?????	?????	?????	?????	?????	?????	?????	?????	?????	?????	?????	?????	?????	?????	?????	?????	?????	?????	?????	?????	?????	?????	?????	?????	?????	?????	?????	?????	?????	?????	?????	?????	?????	?????	?????	?????
	00:00:00	?????	?????	?????	?????	?????	?????	?????	?????	?????	?????	?????	?????	?????	?????	?????	?????	?????	?????	?????	?????	?????	?????	?????	?????	?????	?????	?????	?????	?????	?????	?????	?????	?????	?????	?????	?????	?????	?????	?????	?????	?????	?????	?????	?????	?????	?????	?????	?????
	00:00:00	?????	?????	?????	?????	?????	?????	?????	?????	?????	?????	?????	?????	?????	?????	?????	?????	?????	?????	?????	?????	?????	?????	?????	?????	?????	?????	?????	?????	?????	?????	?????	?????	?????	?????	?????	?????	?????	?????	?????	?????	?????	?????	?????	?????	?????	?????	?????	?????
	00:00:00	?????	?????	?????	?????	?????	?????	?????	?????	?????	?????	?????	?????	?????	?????	?????	?????	?????	?????	?????	?????	?????	?????	?????	?????	?????	?????	?????	?????	?????	?????	?????	?????	?????	?????	?????	?????	?????	?????	?????	?????	?????	?????	?????	?????	?????	?????	?????	?????
Ratio yfp cfp
	Time	A1	A2	A3	A4	A5	A6	A7	A8	A9	A10	A11	A12	B1	B2	B3	B4	B5	B6	B7	B8	B9	B10	B11	B12	C1	C2	C3	C4	C5	C6	C7	C8	C9	C10	C11	C12	D1	D2	D3	D4	D5	D6	D7	D8	D9	D10	D11	D12
	00:00:15	3.575	3.375	3.35	3.361	5.333	2.824	4.451	3.346	3.337	4.789	3.249	3.913	3.098	3.044	2.986	3.983	2.632	4.037	2.225	3.838	4.028	2.767	3.161	3.461	4.111	3.492	4.122	3.281	3.614	4.514	3.217	2.793	3.035	4.447	3.836	5.179	3.255	3.492	3.221	3.193	3.967	2.641	3.504	4.967	4.019	3.187	2.947	4.52
	23:46:32	5.655	5.377	6.476	6.169	4.491	3.498	4.23	4.145	5.38	4.061	2.825	5.632	3.192	6.622	5.929	3.373	4.163	3.933	6.533	3.861	5.153	4.812	3.12	5.302	4.009	3.571	4.249	3.381	4.29	3.879	3.705	5.25	4.085	3.746	6.055	5.675	4.269	4.042	3.268	4.535	4.348	5.515	2.713	4.994	5.846	5.652	4.747	3.368
	1 day, 23:40:57	5.263	3.918	7.639	3.891	3.722	5.573	6.226	3.749	6.932	4.033	2.171	4.773	4.634	12.711	5.556	3.396	7.254	5.879	4.33	4.902	2.859	3.188	7.279	5.012	4.935	5.201	3.449	4.684	5.253	5.211	6.536	5.056	5.955	5.763	3.026	5.214	4.631	4.005	5.897	5.654	4	3.778	4.911	4.661	6.034	4.263	5.746	5.338
	3 days, 0:00:06	4.054	2.896	6.131	3.19	3.82	4.127	4.8	5.776	3.477	2.929	2.204	4.141	3.792	12.983	4.103	5.471	3.979	2.867	5.054	3.512	3.298	4.027	3.902	3.053	3.478	3.818	6.318	3.394	5.057	4.644	6.337	3.24	5.316	2.709	4.471	3.775	5.583	5.694	3.409	4.643	4.814	4.659	3.601	3.923	4.793	3.269	4.706	3.99
	3 days, 23:50:19	6.388	3.951	3.965	7.569	6.967	5.114	6.186	3.778	3.404	5.456	5.345	8.849	5.625	15.382	6.789	6.412	5.053	4.31	4.907	4.57	4.825	4.829	6.573	6.141	3.579	15.171	13.283	6.607	3.942	3.592	4.853	5.293	4.995	5.354	4.689	4.84	3.634	17.307	5.935	3.903	6.89	5.146	4.226	4.549	5.637	5.964	4.237	3.686
	4 days, 23:54:16	22.649	11.639	15.803	3.283	23.245	15.935	4.661	4.298	3.244	6.136	7.353	4.096	11.71	15.959	11.541	5.491	2.177	9.434	5.213	4.522	4.897	4.566	6.598	4.259	16.248	23.033	18.207	2.579	3.175	4.525	4.504	5.056	4.547	3.525	3.773	3.268	6.591	22.725	7.662	7.195	4.729	3.741	4.822	5	4.583	5.105	4.353	3.485
	5 days, 23:56:09	21.548	20.594	14.722	4.609	16.593	12.185	5.619	5.496	3.497	4.317	4	5.241	15.103	10.346	17.696	4.345	4.638	6.301	3.837	3.735	5.477	4.559	4.041	3.942	19.173	11.625	12.097	6.313	4.198	4.42	3.976	4.05	3.581	3.062	5.275	3.342	5.118	16.67	4.947	3.771	4.855	6.091	4.307	3.93	5.241	5.348	3.489	4.461
	7 days, 0:06:34	12.239	17.364	10.44	4.682	9.806	14.172	5.393	3.563	4.876	7.89	4.755	3.819	17.492	9.673	11.496	4.661	4.809	5.919	5.114	5.255	5.854	3.331	4.561	4.897	14.569	9.254	10.543	4.935	4.333	4.827	5.593	5.262	6.182	6.455	4.185	6.993	5.074	11.858	5.174	4.385	5.5	5.227	4.283	4.409	5.527	4.934	5.425	4.394
	8 days, 0:07:26	11.737	13.78	9.853	2.899	11.179	12.077	4.015	3.836	2.872	3.33	4.697	2.34	14.02	10.854	11.227	4.248	3.185	4.118	5.478	3.887	4.239	5.735	3.857	3.839	14.026	10.654	9.729	3.514	3.932	4.092	4.062	3.295	3.396	4.907	6	2.178	3.163	7.469	4.005	4.786	4.738	4.592	3.797	3.553	4.42	4.42	4.019	3.696
	8 days, 23:21:01	10.346	9.611	7.664	4.516	6.637	8.248	4.436	2.691	5.096	4.192	4.858	1.91	9.834	9.381	9.752	3.716	4.247	4.085	3.279	3.771	3.581	5.461	3.332	3.919	6.808	8.454	7.851	4.016	3.936	4.447	4.433	2.964	5.236	2.903	4	4.217	4.083	9.373	3.93	2.833	3.127	3.5	3.75	4.426	3.089	3.972	3.599	3.117
	10 days, 0:04:28	7.556	11.445	9.059	3.459	9.838	9.25	3.491	3.207	4.254	3.236	3.742	2.841	14.949	9.291	9.046	3.237	2.938	3.798	3.825	4.653	4.774	3.566	3.922	2.7	12.282	6.858	6.489	5.481	3.193	3.122	4.678	4.506	3.984	4.222	3.952	2.477	3.5	6.078	3.744	4.771	3.237	3.665	3.631	2.171	3.383	4.88	3.242	4.482
	10 days, 23:55:00	7.529	12.84	7.043	4.132	8.648	9.094	5.201	4.516	5.021	4.607	4.839	3.655	17.617	14.981	10.183	4.075	3.985	4.239	4.938	3.42	5.144	4.9	4.166	3.367	11.666	10.03	9.099	6.176	4.237	3.056	4.532	4.005	5.67	5.819	4.434	3.683	3.914	11.373	5.258	8.436	3.934	6.563	4.43	3.393	5.675	5.644	4.739	4.053
	00:00:00	?????	?????	?????	?????	?????	?????	?????	?????	?????	?????	?????	?????	?????	?????	?????	?????	?????	?????	?????	?????	?????	?????	?????	?????	?????	?????	?????	?????	?????	?????	?????	?????	?????	?????	?????	?????	?????	?????	?????	?????	?????	?????	?????	?????	?????	?????	?????	?????
	00:00:00	?????	?????	?????	?????	?????	?????	?????	?????	?????	?????	?????	?????	?????	?????	?????	?????	?????	?????	?????	?????	?????	?????	?????	?????	?????	?????	?????	?????	?????	?????	?????	?????	?????	?????	?????	?????	?????	?????	?????	?????	?????	?????	?????	?????	?????	?????	?????	?????
	00:00:00	?????	?????	?????	?????	?????	?????	?????	?????	?????	?????	?????	?????	?????	?????	?????	?????	?????	?????	?????	?????	?????	?????	?????	?????	?????	?????	?????	?????	?????	?????	?????	?????	?????	?????	?????	?????	?????	?????	?????	?????	?????	?????	?????	?????	?????	?????	?????	?????
	00:00:00	?????	?????	?????	?????	?????	?????	?????	?????	?????	?????	?????	?????	?????	?????	?????	?????	?????	?????	?????	?????	?????	?????	?????	?????	?????	?????	?????	?????	?????	?????	?????	?????	?????	?????	?????	?????	?????	?????	?????	?????	?????	?????	?????	?????	?????	?????	?????	?????
	00:00:00	?????	?????	?????	?????	?????	?????	?????	?????	?????	?????	?????	?????	?????	?????	?????	?????	?????	?????	?????	?????	?????	?????	?????	?????	?????	?????	?????	?????	?????	?????	?????	?????	?????	?????	?????	?????	?????	?????	?????	?????	?????	?????	?????	?????	?????	?????	?????	?????
	00:00:00	?????	?????	?????	?????	?????	?????	?????	?????	?????	?????	?????	?????	?????	?????	?????	?????	?????	?????	?????	?????	?????	?????	?????	?????	?????	?????	?????	?????	?????	?????	?????	?????	?????	?????	?????	?????	?????	?????	?????	?????	?????	?????	?????	?????	?????	?????	?????	?????
	00:00:00	?????	?????	?????	?????	?????	?????	?????	?????	?????	?????	?????	?????	?????	?????	?????	?????	?????	?????	?????	?????	?????	?????	?????	?????	?????	?????	?????	?????	?????	?????	?????	?????	?????	?????	?????	?????	?????	?????	?????	?????	?????	?????	?????	?????	?????	?????	?????	?????
	00:00:00	?????	?????	?????	?????	?????	?????	?????	?????	?????	?????	?????	?????	?????	?????	?????	?????	?????	?????	?????	?????	?????	?????	?????	?????	?????	?????	?????	?????	?????	?????	?????	?????	?????	?????	?????	?????	?????	?????	?????	?????	?????	?????	?????	?????	?????	?????	?????	?????
	00:00:00	?????	?????	?????	?????	?????	?????	?????	?????	?????	?????	?????	?????	?????	?????	?????	?????	?????	?????	?????	?????	?????	?????	?????	?????	?????	?????	?????	?????	?????	?????	?????	?????	?????	?????	?????	?????	?????	?????	?????	?????	?????	?????	?????	?????	?????	?????	?????	?????
	00:00:00	?????	?????	?????	?????	?????	?????	?????	?????	?????	?????	?????	?????	?????	?????	?????	?????	?????	?????	?????	?????	?????	?????	?????	?????	?????	?????	?????	?????	?????	?????	?????	?????	?????	?????	?????	?????	?????	?????	?????	?????	?????	?????	?????	?????	?????	?????	?????	?????
	00:00:00	?????	?????	?????	?????	?????	?????	?????	?????	?????	?????	?????	?????	?????	?????	?????	?????	?????	?????	?????	?????	?????	?????	?????	?????	?????	?????	?????	?????	?????	?????	?????	?????	?????	?????	?????	?????	?????	?????	?????	?????	?????	?????	?????	?????	?????	?????	?????	?????
Ratio cfp2 od
	Time	A1	A2	A3	A4	A5	A6	A7	A8	A9	A10	A11	A12	B1	B2	B3	B4	B5	B6	B7	B8	B9	B10	B11	B12	C1	C2	C3	C4	C5	C6	C7	C8	C9	C10	C11	C12	D1	D2	D3	D4	D5	D6	D7	D8	D9	D10	D11	D12
	00:00:15	1525.42	1853.77	1861.91	1636.24	1413.72	1750.82	1372.92	1581.99	1516.24	1133.64	1018.65	845.643	1886.1	1854.9	1453.83	1381.54	1436.73	1118.33	1832.06	967.32	1221.89	1193.11	1123.6	1092.63	1835.4	1527.51	1638.07	1370.39	1164.94	1191.63	1053.02	1213.12	1052.63	768.691	965.126	965.938	1863.27	1923.08	1602.13	1096.41	770.061	1121.49	1040.21	817.844	722.524	904.523	1131.29	1084.01
	23:46:31	1697.29	1890.64	1673.39	1365.46	1927.93	2396.62	2198.58	1613.22	1887.91	2321.79	2475.57	1547.51	1846.69	1054.42	1240.4	1720.89	1716.29	2368.42	1678.25	2335.56	1784.7	1920.7	2191.92	1764.09	1654.3	2502.06	1841.72	1270.74	1058.94	1425.27	1517.38	1180.56	1589.67	1452.93	1242.47	1944.19	1827.11	1688.97	947.329	803.601	946.611	831.653	1204.48	882.843	837.696	808.723	1026.59	1894.01
	1 day, 23:40:57	2176.87	1651.71	1252.57	1919.77	2063.18	1590.68	1582.09	2183.45	1414.89	1932.77	2184.26	1443.3	1584.54	915.103	1467.89	1191.01	1372.95	2110.87	1876.29	1447.37	2067.67	2092	1618.94	1795.14	1271.63	1407.16	2068.97	1211.66	930.962	1292.08	1440.84	1590.91	1713.97	1623.31	2025.72	1943.87	1478.32	1748.99	1245.73	1695.22	1840.08	1950.74	1650.89	1713.4	1807.85	1279.48	1462.88	1481.88
	3 days, 0:00:06	1572.8	2321.77	1789.37	2367.35	2044.26	2142.11	1724.14	1743.59	2846.86	2306.22	3014.3	2500	2019.05	1090.74	1866.42	1847.13	1951.71	2370.94	1766.38	1961.33	2445.5	2231.16	1997.83	2744.28	1910.42	1872.69	1227.29	2578.12	2038.22	1530.52	1625.71	1850.14	2056.26	2530.24	2389.56	2141.45	1680.41	1779.84	1410.26	1927.24	1650.13	1663.67	2554.45	2133.85	2151.51	1319.97	1900.74	2209.82
	3 days, 23:50:19	507.292	1523.89	1554.36	1089.2	1194.03	1645.19	1681.77	2108	1718.15	1733.33	1327.35	1160.98	1373.93	988.665	1099.92	1601.73	1765.82	1674.69	1604.48	2080.98	1922.03	1990.57	1481.48	1472.55	2097.09	1301.24	891.542	1048.95	1605.78	1818.86	2147.65	1476.95	1940.73	1808.9	1930.78	1710.96	842.898	1308.45	1888.05	1562.5	1234.08	1332.25	1839.62	1699.49	1169.87	1019.87	1609.09	2123.05
	4 days, 23:54:15	1262.93	1579.76	1061.66	2589.2	1129.76	1174.51	2098.36	2845.95	2427.18	1802.44	1964.06	2207.66	1372.61	995.212	1241.6	1214.75	1851.02	1191.01	1844.77	1931.33	1944.13	1580.11	1292.82	2406.36	969.571	882.085	1188.63	2661.64	2661.72	2250.51	2411.2	1522.9	2036.06	2289.53	2293.58	2747.7	1850.43	1064.2	1445.66	1143.41	2427.98	2375.4	1948.05	2027.17	2230.44	1183.76	1802.08	2619.57
	5 days, 23:56:09	1326.09	1339.59	1981.24	2479.17	1448.6	2103.71	1846.94	1392.79	1677.35	2101.37	1946.47	1532.77	1772.01	1890.17	1500.17	2592.59	2216.65	1369.61	2628.27	2291.87	1948.05	2256.46	2402.17	2263.58	1449.03	1719.21	1722.3	1608.32	2569.21	2835.66	2492.4	1664.94	2391.99	2401.7	1798.11	2456.98	2394.37	1912.39	1779.4	2062.87	2163.8	1892.71	2207.39	2305.36	1900.67	2122.32	1876.25	1847.7
	7 days, 0:06:34	1762.23	1531.37	2134.36	2145.45	1990.9	1863.48	1610.8	1924.14	1737	1566.63	1697.61	1807.03	1313.77	2104.92	1850.03	2192.56	2106.74	1184.21	1616.36	1668.18	1743.64	1333.33	2115.75	1500.39	1398.19	2119.08	2118.77	1858.08	2211.98	1891.39	1926.35	1785.71	2211.05	1879.4	2200.2	1434.11	1923.08	1952.91	1816.39	1721.97	1811.1	1345.42	1931.33	2393.34	1561.92	2468.67	1577.52	2703.58
	8 days, 0:07:26	2074.24	2027.49	2577.19	2700.59	2331.13	2135.19	1914.29	2119.32	2588.12	2766.39	2219.02	3135.78	1524.46	1729.39	1540.21	2756.34	2389.74	1841.58	2123.43	2237.39	1885.54	1812.08	2423.91	2810.68	1737.62	1711.54	1995.92	1674.64	2634.09	2769.05	2274.21	2969.76	2805.76	1903.43	1768.06	2677.9	3245.11	1669.61	1905.21	1878.67	2246.54	1887.32	2740.74	2308.48	2019.84	2480.83	2077.3	2005.3
	8 days, 23:21:01	2097.76	2006.24	2248.56	1818.18	2411.49	2174.84	1766.92	2078.28	1812.92	2340.84	1815.48	2569.51	1560.23	1802.29	2167.65	1953.35	2133.97	1992.03	2379.98	2166.03	1971.02	1729.84	2636.46	2359.44	2421.5	2108.08	2372.98	1932.77	2270.95	1960.2	2028.25	1985.67	2276.08	2087.13	2384.69	2234.49	2266.29	1865.29	2124.3	2165.85	2402.94	2453.22	2787.61	2376.03	2071.8	2746.61	2306.16	2287.89
	10 days, 0:04:27	2597.21	1795.8	2022.55	2741.57	2041.92	2106.67	2067.04	1743.45	2134.96	2101.37	1953.19	2333.61	1449.79	2540.05	2519.89	3064.7	2956.62	1960.4	1890.5	2224.74	2300.55	2429.72	2569.21	2607.3	1707.7	2531.15	2274.2	1836.73	3266.03	2734.84	1666.67	2736.73	1960.38	1631.39	2410.9	2382.47	2401.9	2551.83	2306.01	1916.76	3589.74	2124.51	2626.83	2736.52	1936.65	2379.57	2225.74	2540.42
	10 days, 23:55:00	2645.21	2019.12	2546.44	2450.47	2187.5	2756.68	1606.82	1902.79	1700.98	2103	1583.41	2565.39	1439.55	1781	2340.11	2349.07	2189.62	2023.23	2173.91	2717.65	1925.93	1932.69	1991.2	2803.26	2204.11	1712.08	1984.09	1619.23	2344.28	3486.24	1570.01	2190.08	2075.87	1443.8	2089.83	2059.02	2329.32	2370.69	1997.98	1305.2	2747.6	1742.57	2636.26	2414.19	1908.09	2906.04	1904.32	2145.08
	00:00:00	?????	?????	?????	?????	?????	?????	?????	?????	?????	?????	?????	?????	?????	?????	?????	?????	?????	?????	?????	?????	?????	?????	?????	?????	?????	?????	?????	?????	?????	?????	?????	?????	?????	?????	?????	?????	?????	?????	?????	?????	?????	?????	?????	?????	?????	?????	?????	?????
	00:00:00	?????	?????	?????	?????	?????	?????	?????	?????	?????	?????	?????	?????	?????	?????	?????	?????	?????	?????	?????	?????	?????	?????	?????	?????	?????	?????	?????	?????	?????	?????	?????	?????	?????	?????	?????	?????	?????	?????	?????	?????	?????	?????	?????	?????	?????	?????	?????	?????
	00:00:00	?????	?????	?????	?????	?????	?????	?????	?????	?????	?????	?????	?????	?????	?????	?????	?????	?????	?????	?????	?????	?????	?????	?????	?????	?????	?????	?????	?????	?????	?????	?????	?????	?????	?????	?????	?????	?????	?????	?????	?????	?????	?????	?????	?????	?????	?????	?????	?????
	00:00:00	?????	?????	?????	?????	?????	?????	?????	?????	?????	?????	?????	?????	?????	?????	?????	?????	?????	?????	?????	?????	?????	?????	?????	?????	?????	?????	?????	?????	?????	?????	?????	?????	?????	?????	?????	?????	?????	?????	?????	?????	?????	?????	?????	?????	?????	?????	?????	?????
	00:00:00	?????	?????	?????	?????	?????	?????	?????	?????	?????	?????	?????	?????	?????	?????	?????	?????	?????	?????	?????	?????	?????	?????	?????	?????	?????	?????	?????	?????	?????	?????	?????	?????	?????	?????	?????	?????	?????	?????	?????	?????	?????	?????	?????	?????	?????	?????	?????	?????
	00:00:00	?????	?????	?????	?????	?????	?????	?????	?????	?????	?????	?????	?????	?????	?????	?????	?????	?????	?????	?????	?????	?????	?????	?????	?????	?????	?????	?????	?????	?????	?????	?????	?????	?????	?????	?????	?????	?????	?????	?????	?????	?????	?????	?????	?????	?????	?????	?????	?????
	00:00:00	?????	?????	?????	?????	?????	?????	?????	?????	?????	?????	?????	?????	?????	?????	?????	?????	?????	?????	?????	?????	?????	?????	?????	?????	?????	?????	?????	?????	?????	?????	?????	?????	?????	?????	?????	?????	?????	?????	?????	?????	?????	?????	?????	?????	?????	?????	?????	?????
	00:00:00	?????	?????	?????	?????	?????	?????	?????	?????	?????	?????	?????	?????	?????	?????	?????	?????	?????	?????	?????	?????	?????	?????	?????	?????	?????	?????	?????	?????	?????	?????	?????	?????	?????	?????	?????	?????	?????	?????	?????	?????	?????	?????	?????	?????	?????	?????	?????	?????
	00:00:00	?????	?????	?????	?????	?????	?????	?????	?????	?????	?????	?????	?????	?????	?????	?????	?????	?????	?????	?????	?????	?????	?????	?????	?????	?????	?????	?????	?????	?????	?????	?????	?????	?????	?????	?????	?????	?????	?????	?????	?????	?????	?????	?????	?????	?????	?????	?????	?????
	00:00:00	?????	?????	?????	?????	?????	?????	?????	?????	?????	?????	?????	?????	?????	?????	?????	?????	?????	?????	?????	?????	?????	?????	?????	?????	?????	?????	?????	?????	?????	?????	?????	?????	?????	?????	?????	?????	?????	?????	?????	?????	?????	?????	?????	?????	?????	?????	?????	?????
	00:00:00	?????	?????	?????	?????	?????	?????	?????	?????	?????	?????	?????	?????	?????	?????	?????	?????	?????	?????	?????	?????	?????	?????	?????	?????	?????	?????	?????	?????	?????	?????	?????	?????	?????	?????	?????	?????	?????	?????	?????	?????	?????	?????	?????	?????	?????	?????	?????	?????
[truncated: 49 more columns]

## Sheet: Plate 3 - mediumA_deltaC
Software Version	2001-09-02
Experiment File Path:	C:\Users\Public\Documents\Experiments\Bella\20190512_EE24.12.xpt
Protocol File Path:	C:\Users\Public\Documents\Protocols\Bella\EE22.prt
Plate Number	Plate 3
Date	2019-05-01
Time	10:19:54
Reader Type:	Synergy H1
Reader Serial Number:	266878
Reading Type	Reader
Procedure Details
Plate Type	Nunc 96 flat bottom generic
Discontinuous Kinetics	Runtime 22:00:00 (D:HH:MM), Interval 1:00:00, 23 Reads
	Pause after each run
Eject plate on completion
Shake	Double Orbital: 0:10 (MM:SS)
	Frequency: 365 cpm (2 mm)
Read	Absorbance Endpoint
	Full Plate
	Wavelengths: 600
	Read Speed: Sweep, Delay: 0 msec, Measurements/Data Point: 1
Shake	Linear: 0:02 (MM:SS)
	Frequency: 731 cpm (2 mm)
Read	Fluorescence Endpoint
	Full Plate
	Filter Set 1
	Excitation: 515, Emission: 545
	Optics: Top, Gain: 100
	Filter Set 2
	Excitation: 515, Emission: 545
	Optics: Top, Gain: 120
	Light Source: Xenon Flash, Lamp Energy: High
	Read Speed: Sweep, Delay: 0 msec, Measurements/Data Point: 1
	Read Height: 7 mm
Shake	Linear: 0:02 (MM:SS)
	Frequency: 731 cpm (2 mm)
Read	Fluorescence Endpoint
	Full Plate
	Filter Set 1
	Excitation: 425, Emission: 475
	Optics: Top, Gain: 100
	Filter Set 2
	Excitation: 425, Emission: 475
	Optics: Top, Gain: 60
	Light Source: Xenon Flash, Lamp Energy: High
	Read Speed: Sweep, Delay: 0 msec, Measurements/Data Point: 1
	Read Height: 7 mm
Layout
		1	2	3	4	5	6	7	8	9	10	11	12
	A	SPL1	SPL5	SPL9	SPL13	SPL17	SPL21	SPL25	SPL29	SPL33	SPL37	SPL44	SPL51	Well ID
	B	SPL2	SPL6	SPL10	SPL14	SPL18	SPL22	SPL26	SPL30	SPL34	SPL38	SPL45	SPL52	Well ID
	C	SPL3	SPL7	SPL11	SPL15	SPL19	SPL23	SPL27	SPL31	SPL35	SPL39	SPL46	SPL53	Well ID
	D	SPL4	SPL8	SPL12	SPL16	SPL20	BLK	BLK	SPL32	SPL36	SPL40	SPL47	SPL54	Well ID
	E	SPL58	SPL62	SPL66	SPL70	SPL74	SPL78	SPL82	SPL86	SPL90	SPL41	SPL48	SPL55	Well ID
	F	SPL59	SPL63	SPL67	SPL71	SPL75	SPL79	SPL83	SPL87	SPL91	SPL42	SPL49	SPL56	Well ID
	G	SPL60	SPL64	SPL68	SPL72	SPL76	SPL80	SPL84	SPL88	SPL92	SPL43	SPL50	SPL57	Well ID
	H	SPL61	SPL65	SPL69	SPL73	SPL77	BLK	BLK	SPL89	SPL93	SPL94	SPL95	SPL1	Well ID
Read 1:600
	Time	T° Read 1:600	A1	A2	A3	A4	A5	A6	A7	A8	A9	A10	A11	A12	B1	B2	B3	B4	B5	B6	B7	B8	B9	B10	B11	B12	C1	C2	C3	C4	C5	C6	C7	C8	C9	C10	C11	C12	D1	D2	D3	D4	D5	D6	D7	D8	D9	D10	D11
	00:00:11	35.6	0.163	0.191	0.186	0.197	0.188	0.217	0.195	0.192	0.195	0.195	0.187	0.173	0.19	0.175	0.181	0.175	0.179	0.171	0.191	0.199	0.188	0.18	0.154	0.157	0.201	0.203	0.199	0.233	0.207	0.253	0.198	0.253	0.229	0.211	0.175	0.15	0.202	0.218	0.242	0.296	0.278	0.319	0.235	0.261	0.264	0.237	0.161
	23:46:24	27	0.079	0.074	0.071	0.075	0.071	0.071	0.07	0.076	0.074	0.071	0.076	0.079	0.079	0.115	0.109	0.104	0.075	0.073	0.079	0.088	0.083	0.075	0.071	0.091	0.118	0.136	0.162	0.075	0.105	0.109	0.097	0.08	0.078	0.102	0.074	0.071	0.115	0.106	0.109	0.094	0.104	0.103	0.093	0.098	0.094	0.079	0.071
	1 day, 23:40:49	35.8	0.073	0.136	0.123	0.081	0.139	0.062	0.117	0.112	0.094	0.183	0.081	0.12	0.077	0.08	0.111	0.058	0.134	0.109	0.126	0.071	0.116	0.098	0.066	0.058	0.145	0.209	0.206	0.137	0.068	0.09	0.086	0.177	0.168	0.15	0.079	0.104	0.147	0.145	0.071	0.085	0.068	0.172	0.179	0.134	0.171	0.088	0.117
	3 days, 0:00:32	26.9	0.082	0.121	0.129	0.12	0.125	0.117	0.124	0.142	0.131	0.128	0.137	0.147	0.158	0.14	0.158	0.064	0.152	0.096	0.156	0.173	0.15	0.096	0.122	0.103	0.162	0.144	0.178	0.159	0.066	0.197	0.239	0.233	0.215	0.199	0.177	0.145	0.148	0.156	0.065	0.163	0.067	0.208	0.258	0.262	0.264	0.219	0.156
	3 days, 23:50:17	26.7	0.087	0.161	0.166	0.133	0.145	0.138	0.148	0.162	0.144	0.133	0.149	0.142	0.164	0.181	0.211	0.059	0.216	0.076	0.163	0.147	0.2	0.075	0.144	0.142	0.09	0.16	0.285	0.21	0.073	0.177	0.157	0.247	0.148	0.177	0.139	0.117	0.181	0.191	0.052	0.145	0.077	0.082	0.219	0.113	0.128	0.162	0.101
	4 days, 23:54:07	26.7	0.087	0.118	0.1	0.111	0.096	0.105	0.097	0.114	0.094	0.086	0.112	0.095	0.107	0.135	0.109	0.087	0.101	0.084	0.087	0.088	0.094	0.089	0.103	0.106	0.082	0.098	0.161	0.133	0.155	0.148	0.132	0.09	0.088	0.094	0.105	0.082	0.11	0.088	0.065	0.15	0.088	0.083	0.117	0.087	0.087	0.098	0.086
	5 days, 23:56:03	26.8	0.127	0.152	0.179	0.117	0.1	0.122	0.109	0.089	0.089	0.086	0.087	0.099	0.135	0.111	0.126	0.101	0.094	0.083	0.095	0.084	0.085	0.084	0.087	0.1	0.094	0.139	0.142	0.127	0.302	0.102	0.108	0.097	0.088	0.087	0.084	0.153	0.14	0.119	0.147	0.118	0.104	0.095	0.103	0.096	0.091	0.081	0.073
	7 days, 0:06:34	26.9	0.111	0.153	0.125	0.162	0.157	0.163	0.163	0.153	0.145	0.166	0.157	0.144	0.148	0.154	0.151	0.158	0.155	0.157	0.168	0.165	0.154	0.155	0.155	0.134	0.125	0.13	0.13	0.163	0.185	0.176	0.175	0.181	0.167	0.176	0.189	0.169	0.134	0.149	0.156	0.152	0.164	0.18	0.173	0.156	0.164	0.143	0.161
	8 days, 0:07:18	26.8	0.086	0.178	0.095	0.093	0.095	0.09	0.089	0.087	0.083	0.081	0.086	0.09	0.1	0.102	0.099	0.1	0.093	0.093	0.097	0.1	0.094	0.097	0.092	0.09	0.1	0.104	0.109	0.09	0.103	0.096	0.097	0.103	0.096	0.101	0.09	0.105	0.13	0.094	0.098	0.096	0.1	0.101	0.103	0.099	0.101	0.097	0.096
	8 days, 23:21:05	27.2	0.077	0.495	0.084	0.082	0.081	0.084	0.098	0.206	0.088	0.093	0.079	0.081	0.087	0.086	0.086	0.09	0.104	0.099	0.101	0.102	0.094	0.096	0.093	0.086	0.096	0.099	0.106	0.089	0.105	0.09	0.102	0.1	0.098	0.097	0.095	0.088	0.443	0.082	0.099	0.097	0.108	0.107	0.101	0.105	0.104	0.096	0.092
	10 days, 0:04:21	27	0.161	0.875	0.229	0.193	0.197	0.201	0.179	0.578	0.161	0.159	0.16	0.111	0.188	0.311	0.199	0.157	0.154	0.144	0.168	0.155	0.155	0.15	0.12	0.106	0.202	0.192	0.215	0.186	0.159	0.154	0.19	0.206	0.164	0.156	0.143	0.111	0.757	0.216	0.178	0.15	0.152	0.152	0.177	0.142	0.143	0.128	0.129
	10 days, 23:54:52	26.9	0.087	0.193	0.088	0.088	0.093	0.082	0.085	0.164	0.084	0.078	0.093	0.102	0.098	0.281	0.094	0.107	0.098	0.1	0.105	0.114	0.103	0.114	0.096	0.089	0.093	0.105	0.1	0.089	0.111	0.102	0.1	0.105	0.104	0.108	0.109	0.13	0.306	0.162	0.098	0.11	0.11	0.124	0.12	0.119	0.121	0.118	0.105
	00:00:00
	00:00:00
	00:00:00
	00:00:00
	00:00:00
	00:00:00
	00:00:00
	00:00:00
	00:00:00
	00:00:00
	00:00:00
Read 2:515,545
	Time	T° Read 2:515,545	A1	A2	A3	A4	A5	A6	A7	A8	A9	A10	A11	A12	B1	B2	B3	B4	B5	B6	B7	B8	B9	B10	B11	B12	C1	C2	C3	C4	C5	C6	C7	C8	C9	C10	C11	C12	D1	D2	D3	D4	D5	D6	D7	D8	D9	D10	D11
	00:00:03	35.6	207	201	185	173	268	149	226	169	282	196	130	101	213	267	151	227	249	202	223	222	223	281	257	196	215	176	192	221	264	221	251	163	246	203	173	152	162	303	159	163	218	173	183	190	203	143	183
	23:46:16	27	169	269	168	242	186	209	240	199	136	232	303	166	192	182	235	263	197	219	283	178	202	231	180	180	214	281	225	256	209	218	203	265	176	183	182	207	228	181	223	264	162	97	174	192	260	206	191
	1 day, 23:40:41	35.7	231	177	234	263	231	218	199	328	320	236	173	312	251	299	295	233	219	221	258	251	218	207	278	240	188	223	195	211	189	233	155	205	233	231	213	205	187	247	154	227	200	247	274	230	267	213	188
	3 days, 0:00:25	26.9	236	203	228	310	182	268	175	208	178	216	174	191	221	187	317	190	188	145	282	259	192	308	211	245	197	178	298	273	131	202	247	279	184	171	213	192	245	285	254	181	262	196	214	262	260	288	144
	3 days, 23:50:09	26.7	330	247	222	256	276	273	273	258	253	291	256	209	261	265	259	207	282	264	171	236	234	322	300	248	291	261	283	218	199	243	198	262	237	255	204	250	283	284	232	306	344	224	224	195	344	242	257
	4 days, 23:54:00	26.7	296	194	317	234	252	211	259	262	183	263	254	205	215	184	172	206	264	200	276	240	172	185	176	254	192	214	254	227	147	273	278	288	238	209	110	198	253	195	191	241	177	196	233	213	205	271	201
	5 days, 23:55:55	26.8	231	263	256	246	192	292	247	300	187	239	158	168	194	151	220	199	207	267	210	235	214	298	301	251	241	240	295	224	235	293	288	311	158	255	185	150	198	181	159	264	261	275	286	255	221	270	247
	7 days, 0:06:26	26.9	256	279	225	154	300	252	269	202	207	304	175	286	209	260	201	249	184	208	179	238	237	262	214	282	230	257	217	125	179	335	230	299	318	250	210	212	241	251	248	278	214	216	188	244	236	252	287
	8 days, 0:07:10	26.8	231	658	260	292	262	147	193	211	181	228	244	252	246	269	262	222	290	207	204	224	325	261	220	256	244	262	229	308	218	354	273	296	198	271	269	236	200	235	315	266	254	287	286	304	242	224	227
	8 days, 23:20:58	27.2	208	554	248	180	342	230	225	570	271	292	154	215	224	272	212	194	167	216	253	263	206	341	285	220	151	247	240	229	251	220	229	245	214	158	219	260	785	226	227	231	201	256	192	173	178	266	263
	10 days, 0:04:13	27	218	646	185	218	202	214	261	822	257	176	214	278	312	318	198	157	215	182	270	263	227	195	283	244	237	177	190	264	277	180	223	218	164	238	262	305	686	211	230	262	235	241	296	177	288	199	225
	10 days, 23:54:45	26.9	166	567	289	271	305	209	282	1185	210	183	270	215	250	457	280	328	339	231	246	170	214	219	228	237	174	395	188	226	223	128	207	230	285	275	227	238	597	534	273	177	213	302	265	179	203	278	194
	00:00:00
	00:00:00
	00:00:00
	00:00:00
	00:00:00
	00:00:00
	00:00:00
	00:00:00
	00:00:00
	00:00:00
	00:00:00
Read 2:515,545[2]
	Time	T° Read 2:515,545[2]	A1	A2	A3	A4	A5	A6	A7	A8	A9	A10	A11	A12	B1	B2	B3	B4	B5	B6	B7	B8	B9	B10	B11	B12	C1	C2	C3	C4	C5	C6	C7	C8	C9	C10	C11	C12	D1	D2	D3	D4	D5	D6	D7	D8	D9	D10	D11
	00:00:15	35.6	776	830	729	811	719	728	597	862	762	800	671	710	991	861	879	727	830	890	880	932	686	697	771	677	940	1022	1008	792	820	1009	851	936	800	778	977	778	642	850	998	852	585	644	765	667	845	917	996
	23:46:28	27	987	1044	1161	896	1230	919	1162	713	871	745	880	1001	897	1041	663	1032	1049	699	888	989	722	638	977	991	1109	1073	617	903	829	1015	712	784	992	873	1046	799	634	593	807	794	743	976	899	1055	745	1121	703
	1 day, 23:40:53	35.7	667	922	951	928	875	829	923	1079	1028	894	719	664	908	838	750	807	669	655	750	803	778	1087	929	1103	1034	819	1048	731	1124	1051	639	956	931	1179	775	935	1039	1116	724	766	765	865	955	909	1022	986	926
	3 days, 0:00:37	26.9	807	1010	837	937	939	923	892	1196	919	749	881	1086	916	987	1248	923	1038	922	790	1038	1356	873	785	809	983	1390	703	930	696	1130	957	884	1180	781	845	846	1215	930	838	1063	596	942	874	1077	1120	721	687
	3 days, 23:50:21	26.7	1066	805	1056	1088	1000	934	730	886	1229	633	1023	1010	1019	795	878	1093	942	1070	1511	1012	1075	1082	1066	827	956	982	968	903	988	1134	928	1251	1245	946	865	1041	807	945	847	1053	879	1002	1075	952	842	1081	802
	4 days, 23:54:12	26.7	997	1241	723	829	613	1160	953	780	967	1004	1189	1087	786	954	1191	1222	833	996	1197	946	929	984	969	1111	1155	1106	835	1123	873	1024	815	1265	817	884	863	599	920	943	986	875	774	1102	832	754	875	842	1141
	5 days, 23:56:07	26.8	921	1029	1059	1096	856	1263	928	1010	1052	1022	900	1152	883	1150	886	1176	649	745	1082	813	597	1059	879	1027	1026	679	1203	1268	1173	1035	1091	1050	1005	1079	900	766	1171	1145	725	779	839	981	621	1130	1297	901	1056
	7 days, 0:06:38	26.9	861	1319	997	1099	899	1040	1191	1189	798	788	987	789	885	1167	980	1053	997	1114	1073	1049	1022	1171	846	895	916	949	1363	1013	1201	961	862	850	1197	1239	1090	1197	962	897	929	811	1046	830	774	842	1113	815	1021
	8 days, 0:07:22	26.8	1110	2654	971	920	971	892	915	1225	696	931	900	1199	1118	803	1214	946	776	1085	1037	1203	981	1319	786	703	889	972	675	1036	959	1123	963	1264	997	1059	906	894	1000	1202	992	833	822	1077	1205	697	966	1025	1162
	8 days, 23:21:10	27.2	1009	2040	992	862	953	932	817	2466	820	832	932	1003	997	986	1018	881	940	672	642	821	763	671	968	906	725	706	1101	1125	771	901	765	1104	1004	990	1289	1050	3006	722	865	794	730	565	1163	742	938	870	894
	10 days, 0:04:25	27	786	2774	615	756	791	1223	1085	3673	761	902	1044	808	1054	1204	828	894	897	1045	942	711	1231	1066	1011	1235	1013	836	780	1002	1089	1027	1073	1073	860	951	966	872	3239	1323	920	993	938	851	951	897	898	785	1105
	10 days, 23:54:57	26.9	876	2013	827	1010	1104	1317	901	4961	966	800	972	748	724	1970	979	902	872	1016	1095	1238	805	1183	905	914	829	994	847	1097	1061	916	819	826	807	1067	1181	1057	2771	2269	987	1211	1101	1086	901	1061	1125	1146	1108
	00:00:00
	00:00:00
	00:00:00
	00:00:00
	00:00:00
	00:00:00
	00:00:00
	00:00:00
	00:00:00
	00:00:00
	00:00:00
Read 3:425,475
	Time	T° Read 3:425,475	A1	A2	A3	A4	A5	A6	A7	A8	A9	A10	A11	A12	B1	B2	B3	B4	B5	B6	B7	B8	B9	B10	B11	B12	C1	C2	C3	C4	C5	C6	C7	C8	C9	C10	C11	C12	D1	D2	D3	D4	D5	D6	D7	D8	D9	D10	D11
	00:00:03	35.5	8073	8214	8015	7976	7770	8412	7790	7353	7847	7766	7662	7559	9071	8728	7909	8014	7859	8081	7885	7540	7773	7366	6975	6726	10082	9793	8155	8585	8677	8697	8004	8684	8212	8163	7784	7096	9484	9423	8883	9358	9676	8888	7674	9250	7910	7934	6998
	23:46:16	27	5905	5804	5281	5904	5834	5911	6068	5688	5380	5542	5369	6416	5956	6474	5716	5886	5737	5470	5320	5755	5764	5452	5312	5753	6603	7297	5906	5598	5450	5726	5821	5631	5424	5445	5434	5316	6489	6259	5790	5827	5660	6016	5345	5594	5616	5642	5431
	1 day, 23:40:41	35.6	5029	7485	7160	5505	7202	5055	6935	6462	6299	7140	5733	6328	5417	5646	6809	5068	6508	6736	6987	5229	6681	6597	4956	5003	7199	7938	7576	7133	4673	5753	5769	6950	6665	6662	5107	6632	7510	7297	4400	5234	4903	7022	7068	6724	6521	5390	6573
	3 days, 0:00:24	26.9	6988	9601	9405	9386	9199	8695	9250	8690	8073	8549	8980	8120	9462	9853	9298	4759	9226	7198	8482	8726	8663	7718	6606	6725	8768	9833	10520	10279	5283	9732	10900	10265	9472	8201	7926	8017	9628	10584	5250	9439	5447	8781	9600	9179	9635	8214	7479
	3 days, 23:50:09	26.7	8394	8343	7738	8016	7834	7771	8192	7833	7861	7637	7668	7884	8748	8980	9533	5465	10430	6654	8507	8166	9230	7939	8140	8110	6740	8527	9463	7984	5936	8490	7551	8742	7710	7464	6550	7669	8557	8553	4874	8017	6372	6818	7583	7749	7659	7395	7157
	4 days, 23:54:00	26.8	9739	6632	6346	7436	7220	6630	6646	7216	7098	6684	6814	7950	7432	7113	6291	6893	6076	7397	6976	7013	7177	7567	6662	6881	7041	7237	7588	6933	6636	7032	6840	6070	6324	6701	6819	7570	7490	6456	5198	6738	6372	6838	6628	6936	6589	6409	6833
	5 days, 23:55:55	26.8	9837	7302	7361	6700	6697	6520	6836	6426	6595	6575	6518	6979	7284	6166	6955	6652	6632	6460	6362	6562	6743	6836	6187	6198	6715	6954	6935	6869	8700	6443	6330	6050	6565	6227	6234	4628	6952	6975	6892	6658	6062	6301	6376	5719	6498	6103	5597
	7 days, 0:06:26	26.9	11345	10793	7970	8388	8535	8738	8229	7609	7925	8011	7936	8141	9061	8918	7881	7944	8620	7802	8350	8235	7575	8091	7599	7659	7803	8713	8279	8583	7591	8335	8321	8392	8087	8416	8158	8674	7949	7856	7584	7998	7925	7982	8179	7710	8043	7715	7616
	8 days, 0:07:10	26.8	10003	17372	7618	7536	7444	7570	7522	7954	8131	7354	8199	8676	7523	7375	7591	7260	7614	8078	7622	8120	7923	7861	8140	8610	7677	8005	7556	7481	7460	7532	7869	7910	7711	7994	7985	8505	8016	6870	7343	8054	8054	7656	8187	7779	7826	7838	7836
	8 days, 23:20:57	27.2	9795	25118	8841	9529	9515	9120	9228	88880	9618	9403	8949	9279	8458	9042	8678	9071	9146	9598	9448	10152	9479	9837	9061	10053	8900	9017	8397	8354	9249	8476	8322	8755	9047	9393	9038	10064	21784	9114	9228	9636	9654	9413	9970	9597	9512	9189	9387
	10 days, 0:04:13	27	10794	20327	9091	8753	8613	8783	8144	OVRFLW	7805	7916	7879	7814	8214	9462	8524	8013	7832	7675	7371	7559	7978	7521	7641	7664	9104	8319	8598	7614	7713	8244	7609	7841	7726	7765	7826	7838	24505	16410	8670	8430	7895	7527	7702	7986	7672	7738	7369
	10 days, 23:54:45	26.9	9527	15448	7357	7565	7684	7590	8379	OVRFLW	7421	7484	7656	8700	6939	14428	7073	7843	7892	8054	7878	8067	8641	8480	8541	8649	7527	6994	6891	7462	7847	7989	7680	7610	8047	7695	8178	9109	19790	54630	7133	8865	8615	7984	8194	7750	7774	7980	8312
	00:00:00
	00:00:00
	00:00:00
	00:00:00
	00:00:00
	00:00:00
	00:00:00
	00:00:00
	00:00:00
	00:00:00
	00:00:00
Read 3:425,475[2]
	Time	T° Read 3:425,475[2]	A1	A2	A3	A4	A5	A6	A7	A8	A9	A10	A11	A12	B1	B2	B3	B4	B5	B6	B7	B8	B9	B10	B11	B12	C1	C2	C3	C4	C5	C6	C7	C8	C9	C10	C11	C12	D1	D2	D3	D4	D5	D6	D7	D8	D9	D10	D11
	00:00:15	35.5	235	188	197	152	185	224	186	177	213	163	195	158	199	208	235	145	175	176	219	182	212	218	196	137	204	250	178	177	212	172	229	189	213	144	220	150	215	208	181	182	267	287	171	179	181	202	203
	23:46:28	27	180	171	142	168	143	72	166	170	102	162	112	191	123	166	123	147	136	177	101	103	189	156	95	160	180	135	181	105	124	137	168	102	142	165	107	126	193	133	108	124	150	140	149	140	146	95	123
	1 day, 23:40:53	35.6	145	152	171	173	211	109	118	179	164	156	110	179	103	172	178	109	156	184	167	102	132	173	150	149	224	178	215	184	127	162	88	107	164	175	161	122	168	174	136	99	94	204	196	199	174	121	174
	3 days, 0:00:36	26.9	204	222	198	242	242	247	258	235	249	236	191	161	195	281	273	145	235	241	240	246	203	158	164	119	180	265	268	216	91	215	272	225	222	225	217	161	187	255	148	250	122	193	202	253	215	171	158
	3 days, 23:50:21	26.7	189	178	129	204	236	221	193	196	157	157	146	200	147	226	197	135	251	176	211	170	169	187	160	199	159	186	271	195	120	180	167	255	193	216	163	225	212	198	85	155	223	178	208	198	155	161	153
	4 days, 23:54:12	26.8	311	141	177	208	194	191	115	192	200	171	158	165	139	205	154	146	138	165	153	196	171	172	143	131	183	185	232	213	220	169	144	122	115	147	156	131	196	170	105	166	162	199	190	143	151	140	161
	5 days, 23:56:07	26.8	221	130	212	176	110	219	139	170	125	184	145	191	159	151	156	184	110	142	183	177	219	111	128	201	166	207	196	143	239	194	218	182	169	117	155	117	196	202	188	202	168	184	126	96	164	176	165
	7 days, 0:06:38	26.9	271	278	169	194	222	255	216	161	166	219	225	183	186	238	207	180	220	211	231	205	206	146	171	188	207	236	187	190	117	129	213	191	192	220	197	239	185	167	153	153	204	241	167	144	176	190	156
	8 days, 0:07:22	26.8	213	433	173	214	242	154	211	232	116	184	217	170	181	172	197	243	211	219	222	230	189	166	189	226	229	238	190	138	141	197	209	154	189	215	210	209	185	203	169	113	159	165	251	234	181	189	201
	8 days, 23:21:09	27.2	232	614	257	208	224	247	190	2113	219	222	248	189	215	204	168	238	198	255	179	230	235	256	204	223	259	212	214	189	204	188	237	172	245	199	267	272	531	259	203	191	241	183	245	270	184	248	185
	10 days, 0:04:25	27	286	407	247	232	148	204	225	2601	232	265	112	177	209	225	266	176	133	169	188	219	179	158	215	165	242	256	246	209	179	193	208	159	151	176	184	221	572	401	151	167	187	170	166	223	175	182	221
	10 days, 23:54:57	26.9	252	377	131	225	176	202	154	3547	196	177	159	195	158	356	186	186	211	171	152	244	186	230	231	176	199	188	151	136	195	183	165	135	175	167	197	202	440	1339	148	220	236	156	177	166	197	197	186
	00:00:00
	00:00:00
	00:00:00
	00:00:00
	00:00:00
	00:00:00
	00:00:00
	00:00:00
	00:00:00
	00:00:00
	00:00:00
Ratio yfp od
	Time	A1	A2	A3	A4	A5	A6	A7	A8	A9	A10	A11	A12	B1	B2	B3	B4	B5	B6	B7	B8	B9	B10	B11	B12	C1	C2	C3	C4	C5	C6	C7	C8	C9	C10	C11	C12	D1	D2	D3	D4	D5	D6	D7	D8	D9	D10	D11	D12
	00:00:03	1266.83	1051.81	995.694	877.727	1428.57	685.688	1161.95	882.507	1443.93	1003.07	696.304	584.153	1122.83	1522.23	836.102	1294.92	1391.06	1181.98	1166.93	1116.14	1187.43	1561.98	1671	1252.4	1070.18	866.142	967.254	948.091	1277.83	874.209	1267.68	644.778	1072.83	961.174	988.007	1011.98	801.583	1391.82	656.482	551.234	784.455	542.32	778.723	728.248	769.522	603.121	1140.19	1367.12
	23:46:16	2147.39	3620.46	2366.2	3209.55	2608.7	2956.15	3423.68	2632.28	1832.88	3267.61	3986.84	2090.68	2433.46	1585.37	2157.94	2519.16	2609.27	2991.8	3582.28	2022.73	2439.61	3075.9	2549.57	1982.38	1815.1	2064.66	1387.18	3417.89	1986.69	2007.37	2086.33	3324.97	2259.31	1797.64	2459.46	2927.86	1987.79	1707.55	2042.12	2820.51	1551.72	944.499	1875	1957.19	2768.9	2594.46	2705.38	2976.02
	1 day, 23:40:41	3151.43	1305.31	1910.2	3242.91	1658.29	3516.13	1708.15	2939.07	3404.26	1288.91	2138.44	2606.52	3259.74	3732.83	2669.68	4024.18	1630.68	2023.81	2055.78	3540.2	1884.18	2116.56	4193.06	4116.64	1297.45	1067.5	945.684	1535.66	2767.2	2577.43	1791.91	1156.23	1391.05	1538.97	2696.2	1973.05	1273.84	1701.1	2169.01	2667.45	2941.18	1431.88	1531.58	1721.56	1558.67	2406.78	1600	1513.8
	3 days, 0:00:25	2885.09	1683.25	1763.34	2583.33	1453.67	2292.56	1412.43	1460.67	1355.67	1686.18	1269.15	1297.55	1398.73	1337.62	2010.15	2978.06	1238.47	1508.85	1806.53	1498.84	1281.71	3218.39	1730.93	2383.27	1213.8	1239.55	1670.4	1720.23	1981.85	1023.3	1033.47	1200	854.621	858.434	1200.68	1322.31	1656.53	1824.58	3919.75	1109.75	3922.16	941.855	829.457	1001.53	984.476	1314.47	925.45	1589.5
	3 days, 23:50:09	3788.75	1537.98	1336.54	1932.08	1899.52	1975.4	1838.38	1592.59	1756.94	2187.97	1718.12	1469.76	1591.46	1465.71	1229.24	3496.62	1307.98	3464.57	1049.08	1603.26	1172.35	4316.35	2080.44	1741.57	3229.74	1627.18	992.286	1039.58	2718.58	1375.21	1263.56	1062.02	1598.11	1440.68	1469.74	2134.93	1560.95	1490.81	4470.14	2110.34	4473.34	2735.04	1022.36	1728.72	2683.31	1497.53	2552.14	1396.43
	4 days, 23:54:00	3398.39	1641.29	3176.35	2110.01	2616.82	2017.21	2664.61	2298.25	1948.88	3043.98	2273.95	2155.63	2013.11	1367.01	1583.79	2365.1	2619.05	2389.49	3172.41	2724.18	1825.9	2067.04	1712.06	2389.46	2341.46	2181.45	1581.57	1713.21	950.841	1849.59	2109.26	3182.32	2695.36	2218.68	1047.62	2420.54	2300	2226.03	2952.09	1602.39	2009.08	2361.45	1994.86	2459.58	2342.86	2770.96	2326.39	3118.28
	5 days, 23:55:55	1818.9	1732.54	1433.37	2095.4	1929.65	2397.37	2259.84	3386.01	2103.49	2775.84	1805.71	1691.84	1434.91	1361.59	1743.27	1968.35	2206.82	3216.87	2215.19	2790.97	2532.54	3564.59	3471.74	2502.49	2569.3	1730.35	2078.93	1769.35	777.373	2878.19	2674.09	3209.49	1789.35	2944.57	2207.64	983.607	1413.28	1521.01	1080.16	2244.9	2507.2	2900.84	2763.28	2667.36	2425.91	3329.22	3378.93	2443.26
	7 days, 0:06:26	2316.74	1822.34	1801.44	949.445	1916.93	1545.06	1648.28	1321.99	1425.62	1831.33	1115.36	1983.36	1413.12	1685.03	1327.61	1573.96	1187.1	1324	1062.94	1443.3	1535.97	1694.7	1385.11	2104.48	1842.95	1973.89	1674.38	769.231	966.523	1906.66	1312.04	1651.93	1899.64	1419.65	1110.52	1254.44	1803.89	1681.18	1594.86	1833.77	1302.49	1198.67	1083.57	1562.1	1435.52	1757.32	1781.5	1608.17
	8 days, 0:07:10	2673.61	3696.63	2739.73	3146.55	2763.71	1635.15	2173.42	2428.08	2180.72	2828.78	2833.91	2806.24	2472.36	2637.26	2657.2	2213.36	3128.37	2233.01	2096.61	2246.74	3446.45	2696.28	2396.51	2853.96	2437.56	2509.58	2108.66	3407.08	2124.76	3672.2	2808.64	2859.9	2058.21	2688.49	2982.26	2239.09	1542.02	2513.37	3207.74	2773.72	2545.09	2855.72	2782.1	3076.92	2388.94	2309.28	2369.52	2632.58
	8 days, 23:20:58	2697.8	1120.32	2959.43	2197.8	4232.67	2741.36	2291.24	2765.65	3072.56	3129.69	1941.99	2670.81	2560	3181.29	2470.86	2153.16	1604.23	2186.24	2504.95	2588.58	2193.82	3548.39	3077.75	2549.25	1579.5	2492.43	2257.76	2567.26	2397.33	2436.32	2256.16	2459.84	2190.38	1630.55	2302.84	2957.91	1770.81	2766.22	2304.57	2378.99	1866.3	2397	1895.36	1649.19	1713.19	2762.2	2852.49	2932.33
	10 days, 0:04:13	1354.04	737.864	809.274	1128.95	1023.82	1063.62	1454.04	1422.64	1592.32	1105.53	1337.5	2509.03	1656.93	1024.15	997.481	998.093	1399.74	1265.65	1606.19	1698.97	1469.26	1301.74	2368.2	2297.55	1173.85	922.836	884.544	1421.65	1743.23	1172.64	1172.45	1059.28	1002.45	1526.62	1836.02	2760.18	905.611	976.852	1293.59	1747.83	1544.02	1590.76	1673.26	1242.11	2018.22	1554.69	1741.49	1796.45
	10 days, 23:54:45	1899.31	2936.3	3287.83	3065.61	3293.74	2564.42	3317.65	7243.28	2505.97	2358.25	2909.48	2114.06	2545.82	1625.18	2966.1	3068.29	3476.92	2321.61	2333.97	1497.8	2081.71	1929.52	2367.6	2651.01	1875	3779.9	1883.77	2547.91	2012.63	1254.9	2061.75	2194.66	2737.75	2541.59	2084.48	1826.55	1952.26	3298.33	2791.41	1610.56	1943.43	2439.42	2206.49	1508	1684.65	2351.95	1842.36	2191.36
	00:00:00	?????	?????	?????	?????	?????	?????	?????	?????	?????	?????	?????	?????	?????	?????	?????	?????	?????	?????	?????	?????	?????	?????	?????	?????	?????	?????	?????	?????	?????	?????	?????	?????	?????	?????	?????	?????	?????	?????	?????	?????	?????	?????	?????	?????	?????	?????	?????	?????
	00:00:00	?????	?????	?????	?????	?????	?????	?????	?????	?????	?????	?????	?????	?????	?????	?????	?????	?????	?????	?????	?????	?????	?????	?????	?????	?????	?????	?????	?????	?????	?????	?????	?????	?????	?????	?????	?????	?????	?????	?????	?????	?????	?????	?????	?????	?????	?????	?????	?????
	00:00:00	?????	?????	?????	?????	?????	?????	?????	?????	?????	?????	?????	?????	?????	?????	?????	?????	?????	?????	?????	?????	?????	?????	?????	?????	?????	?????	?????	?????	?????	?????	?????	?????	?????	?????	?????	?????	?????	?????	?????	?????	?????	?????	?????	?????	?????	?????	?????	?????
	00:00:00	?????	?????	?????	?????	?????	?????	?????	?????	?????	?????	?????	?????	?????	?????	?????	?????	?????	?????	?????	?????	?????	?????	?????	?????	?????	?????	?????	?????	?????	?????	?????	?????	?????	?????	?????	?????	?????	?????	?????	?????	?????	?????	?????	?????	?????	?????	?????	?????
	00:00:00	?????	?????	?????	?????	?????	?????	?????	?????	?????	?????	?????	?????	?????	?????	?????	?????	?????	?????	?????	?????	?????	?????	?????	?????	?????	?????	?????	?????	?????	?????	?????	?????	?????	?????	?????	?????	?????	?????	?????	?????	?????	?????	?????	?????	?????	?????	?????	?????
	00:00:00	?????	?????	?????	?????	?????	?????	?????	?????	?????	?????	?????	?????	?????	?????	?????	?????	?????	?????	?????	?????	?????	?????	?????	?????	?????	?????	?????	?????	?????	?????	?????	?????	?????	?????	?????	?????	?????	?????	?????	?????	?????	?????	?????	?????	?????	?????	?????	?????
	00:00:00	?????	?????	?????	?????	?????	?????	?????	?????	?????	?????	?????	?????	?????	?????	?????	?????	?????	?????	?????	?????	?????	?????	?????	?????	?????	?????	?????	?????	?????	?????	?????	?????	?????	?????	?????	?????	?????	?????	?????	?????	?????	?????	?????	?????	?????	?????	?????	?????
	00:00:00	?????	?????	?????	?????	?????	?????	?????	?????	?????	?????	?????	?????	?????	?????	?????	?????	?????	?????	?????	?????	?????	?????	?????	?????	?????	?????	?????	?????	?????	?????	?????	?????	?????	?????	?????	?????	?????	?????	?????	?????	?????	?????	?????	?????	?????	?????	?????	?????
	00:00:00	?????	?????	?????	?????	?????	?????	?????	?????	?????	?????	?????	?????	?????	?????	?????	?????	?????	?????	?????	?????	?????	?????	?????	?????	?????	?????	?????	?????	?????	?????	?????	?????	?????	?????	?????	?????	?????	?????	?????	?????	?????	?????	?????	?????	?????	?????	?????	?????
	00:00:00	?????	?????	?????	?????	?????	?????	?????	?????	?????	?????	?????	?????	?????	?????	?????	?????	?????	?????	?????	?????	?????	?????	?????	?????	?????	?????	?????	?????	?????	?????	?????	?????	?????	?????	?????	?????	?????	?????	?????	?????	?????	?????	?????	?????	?????	?????	?????	?????
	00:00:00	?????	?????	?????	?????	?????	?????	?????	?????	?????	?????	?????	?????	?????	?????	?????	?????	?????	?????	?????	?????	?????	?????	?????	?????	?????	?????	?????	?????	?????	?????	?????	?????	?????	?????	?????	?????	?????	?????	?????	?????	?????	?????	?????	?????	?????	?????	?????	?????
Ratio cfp od
	Time	A1	A2	A3	A4	A5	A6	A7	A8	A9	A10	A11	A12	B1	B2	B3	B4	B5	B6	B7	B8	B9	B10	B11	B12	C1	C2	C3	C4	C5	C6	C7	C8	C9	C10	C11	C12	D1	D2	D3	D4	D5	D6	D7	D8	D9	D10	D11	D12
	00:00:03	49406.4	42982.7	43137.8	40466.8	41417.9	38711.5	40051.4	38396.9	40179.2	39744.1	41039.1	43718.9	47817.6	49760.5	43792.9	45715.9	43905	47285	41261.1	37908.5	41389.8	40945	45351.1	42977.6	50184.2	48193.9	41083.1	36829.7	41999	34402.7	40424.2	34351.3	35813.3	38650.6	44454.6	47243.7	46927.3	43284.3	36676.3	31646.9	34818.3	27862.1	32655.3	35454.2	29984.8	33462.7	43601.2	41767.8
	23:46:16	75031.8	78115.7	74380.3	78302.4	81823.3	83606.8	86562.1	75238.1	72506.7	78056.3	70644.7	80806	75488	56393.7	52488.5	56379.3	75986.8	74726.8	67341.8	65397.7	69613.5	72596.5	75240.8	63359	56005.1	53615	36411.8	74739.7	51806.1	52725.6	59825.3	70652.4	69627.7	53487.2	73432.4	75190.9	56573.7	59047.2	53022	62254.3	54214.6	58578.4	57597	57023.4	59808.3	71057.9	76926.3	80282.1
	1 day, 23:40:41	68608.5	55199.1	58449	67879.2	51701.4	81532.3	59527.9	57903.2	67010.6	38995.1	70865.3	52865.5	70350.6	70486.9	61619.9	87530.2	48458.7	61685	55673.3	73751.8	57744.2	67454	74751.1	85814.8	49682.5	37999	36741	51914.1	68418.7	63639.4	66693.6	39199.1	39791	44383.7	64645.6	63830.6	51158	50254.8	61971.8	61504.1	72102.9	40707.2	39508.1	50329.3	38067.7	60904	55940.4	61763.1
	3 days, 0:00:24	85427.9	79610.3	72737.8	78216.7	73474.4	74379.8	74657	61025.3	61485.1	66736.9	65499.6	55163	59886.1	70479.3	58960.1	74592.5	60777.3	74901.1	54337	50497.7	57830.4	80647.9	54192	65418.3	54023.4	68474.9	58968.6	64770	79924.4	49300.9	45606.7	44150.5	43994.4	41169.7	44678.7	55213.5	65098	67759.3	81018.5	57872.5	81541.9	42196.1	37209.3	35087.9	36482.4	37489.7	48065.6	49834.1
	3 days, 23:50:09	96372	51948.9	46586.4	60498.1	53916	56230.1	55165	48351.9	54590.3	57421.1	51463.1	55443	53341.5	49668.1	45244.4	92314.2	48376.6	87322.8	52190.2	55475.5	46242.5	106421	56449.4	56952.2	74805.8	53160.8	33180.2	38073.4	81092.9	48047.5	48187.6	35435.8	51989.2	42169.5	47190.2	65491	47198	44897.6	93911.4	55289.7	82860.9	83247.9	34609.8	68696.8	59742.6	45761.1	71072.5	54301.8
	4 days, 23:54:00	111814	56108.3	63587.2	67051.4	74974	63384.3	68374.5	63298.2	75591.1	77361.1	61002.7	83596.2	69588	52845.5	57928.2	79138.9	60277.8	88375.1	80183.9	79602.7	76189	84547.5	64805.4	64731.9	85865.9	73771.7	47247.8	52324.5	42923.7	47642.3	51896.8	67071.8	71619.5	71135.9	64942.9	92542.8	68090.9	73698.6	80340	44800.5	72326.9	82385.5	56746.6	80092.4	75302.9	65531.7	79085.6	75010.8
	5 days, 23:55:55	77456.7	48102.8	41215	57069.8	67306.5	53530.4	62543.5	72528.2	74184.5	76364.7	74491.4	70282	53875.7	55599.6	55110.9	65796.2	70703.6	77831.3	67109.7	77933.5	79798.8	81770.3	71361	61794.6	71588.5	50137	48872.4	54257.5	28779.4	63290.8	58774.4	62435.5	74348.8	71905.3	74391.4	30347.5	49621.7	58613.4	46820.7	56615.6	58232.5	66466.2	61603.9	59822.2	71328.2	75252.8	76566.3	77316.4
	7 days, 0:06:26	102670	70496.4	63811	51713.9	54536.7	53574.5	50422.8	49797.1	54579.9	48259	50580	56456.3	61264.4	57796.5	52054.2	50214.9	55612.9	49662.6	49584.3	49939.4	49092.7	52335.1	49184.5	57156.7	62524	66920.1	63881.2	52818.5	40988.1	47438.8	47467.2	46364.6	48309.4	47791	43141.2	51325.4	59498.5	52618.9	48771.7	52757.3	48234.9	44295.2	47141.2	49359.8	48923.4	53800.6	47275	53190.8
	8 days, 0:07:10	115775	97595.5	80274	81206.9	78523.2	84204.7	84707.2	91530.5	97963.9	91240.7	95226.5	96614.7	75608	72303.9	76987.8	72382.9	82135.9	87141.3	78335	81444.3	84019.1	81208.7	88671	95986.6	76693.3	76676.2	69576.4	82754.4	72709.6	78132.8	80956.8	76425.1	80155.9	79305.6	88525.5	80692.6	61804.2	73475.9	74776	83983.3	80701.4	76179.1	79640.1	78734.8	77255.7	80804.1	81795.4	78361.7
	8 days, 23:20:57	127043	50794.7	105501	116349	117760	108701	93971.5	431247	109048	100782	112850	115267	96662.9	105754	101142	100677	87857.8	97145.7	93544.6	99921.3	100948	102362	97851	116489	93096.2	90988.9	78993.4	93654.7	88338.1	93864.9	81990.1	87901.6	92599.8	96935	95036.8	114494	49140.5	111554	93685.3	99237.9	89637.9	88136.7	98420.5	91487.1	91549.6	95420.6	101811	123471
	10 days, 0:04:13	67043.5	23217.6	39768.2	45328.8	43654.3	43653.1	45370.5	?????	48358.1	49723.6	49243.8	70523.5	43621.9	30473.4	42942.1	50940.9	50989.6	53372.7	43848.9	48830.7	51637.5	50206.9	63941.4	72165.7	45091.6	43373.3	40027.9	41001.6	48540	53706.8	40005.3	38100.1	47224.9	49807.6	54842.3	70932.1	32349.8	75972.2	48762.7	56237.5	51872.5	49683.2	43538.7	56042.1	53763.1	60453.1	57035.6	60030.8
	10 days, 23:54:45	109005	80000	83697.4	85576.9	82980.6	93128.8	98576.5	?????	88556.1	96443.3	82500	85545.7	70661.9	51308.7	74925.8	73367.6	80943.6	80944.7	74743.8	71074.9	84056.4	74713.7	88691.6	96745	81109.9	66928.2	69048.1	84126.3	70821.3	78323.5	76494	72614.5	77300.7	71118.3	75096.4	69907.9	64715.5	337431	72934.6	80664.2	78604	64491.1	68226.5	65290.6	64514.5	67512.7	78936.4	68765.4
	00:00:00	?????	?????	?????	?????	?????	?????	?????	?????	?????	?????	?????	?????	?????	?????	?????	?????	?????	?????	?????	?????	?????	?????	?????	?????	?????	?????	?????	?????	?????	?????	?????	?????	?????	?????	?????	?????	?????	?????	?????	?????	?????	?????	?????	?????	?????	?????	?????	?????
	00:00:00	?????	?????	?????	?????	?????	?????	?????	?????	?????	?????	?????	?????	?????	?????	?????	?????	?????	?????	?????	?????	?????	?????	?????	?????	?????	?????	?????	?????	?????	?????	?????	?????	?????	?????	?????	?????	?????	?????	?????	?????	?????	?????	?????	?????	?????	?????	?????	?????
	00:00:00	?????	?????	?????	?????	?????	?????	?????	?????	?????	?????	?????	?????	?????	?????	?????	?????	?????	?????	?????	?????	?????	?????	?????	?????	?????	?????	?????	?????	?????	?????	?????	?????	?????	?????	?????	?????	?????	?????	?????	?????	?????	?????	?????	?????	?????	?????	?????	?????
	00:00:00	?????	?????	?????	?????	?????	?????	?????	?????	?????	?????	?????	?????	?????	?????	?????	?????	?????	?????	?????	?????	?????	?????	?????	?????	?????	?????	?????	?????	?????	?????	?????	?????	?????	?????	?????	?????	?????	?????	?????	?????	?????	?????	?????	?????	?????	?????	?????	?????
	00:00:00	?????	?????	?????	?????	?????	?????	?????	?????	?????	?????	?????	?????	?????	?????	?????	?????	?????	?????	?????	?????	?????	?????	?????	?????	?????	?????	?????	?????	?????	?????	?????	?????	?????	?????	?????	?????	?????	?????	?????	?????	?????	?????	?????	?????	?????	?????	?????	?????
	00:00:00	?????	?????	?????	?????	?????	?????	?????	?????	?????	?????	?????	?????	?????	?????	?????	?????	?????	?????	?????	?????	?????	?????	?????	?????	?????	?????	?????	?????	?????	?????	?????	?????	?????	?????	?????	?????	?????	?????	?????	?????	?????	?????	?????	?????	?????	?????	?????	?????
	00:00:00	?????	?????	?????	?????	?????	?????	?????	?????	?????	?????	?????	?????	?????	?????	?????	?????	?????	?????	?????	?????	?????	?????	?????	?????	?????	?????	?????	?????	?????	?????	?????	?????	?????	?????	?????	?????	?????	?????	?????	?????	?????	?????	?????	?????	?????	?????	?????	?????
	00:00:00	?????	?????	?????	?????	?????	?????	?????	?????	?????	?????	?????	?????	?????	?????	?????	?????	?????	?????	?????	?????	?????	?????	?????	?????	?????	?????	?????	?????	?????	?????	?????	?????	?????	?????	?????	?????	?????	?????	?????	?????	?????	?????	?????	?????	?????	?????	?????	?????
	00:00:00	?????	?????	?????	?????	?????	?????	?????	?????	?????	?????	?????	?????	?????	?????	?????	?????	?????	?????	?????	?????	?????	?????	?????	?????	?????	?????	?????	?????	?????	?????	?????	?????	?????	?????	?????	?????	?????	?????	?????	?????	?????	?????	?????	?????	?????	?????	?????	?????
	00:00:00	?????	?????	?????	?????	?????	?????	?????	?????	?????	?????	?????	?????	?????	?????	?????	?????	?????	?????	?????	?????	?????	?????	?????	?????	?????	?????	?????	?????	?????	?????	?????	?????	?????	?????	?????	?????	?????	?????	?????	?????	?????	?????	?????	?????	?????	?????	?????	?????
	00:00:00	?????	?????	?????	?????	?????	?????	?????	?????	?????	?????	?????	?????	?????	?????	?????	?????	?????	?????	?????	?????	?????	?????	?????	?????	?????	?????	?????	?????	?????	?????	?????	?????	?????	?????	?????	?????	?????	?????	?????	?????	?????	?????	?????	?????	?????	?????	?????	?????
Ratio yfp cfp
	Time	A1	A2	A3	A4	A5	A6	A7	A8	A9	A10	A11	A12	B1	B2	B3	B4	B5	B6	B7	B8	B9	B10	B11	B12	C1	C2	C3	C4	C5	C6	C7	C8	C9	C10	C11	C12	D1	D2	D3	D4	D5	D6	D7	D8	D9	D10	D11	D12
	00:00:15	3.302	4.415	3.701	5.336	3.886	3.25	3.21	4.87	3.577	4.908	3.441	4.494	4.98	4.139	3.74	5.014	4.743	5.057	4.018	5.121	3.236	3.197	3.934	4.942	4.608	4.088	5.663	4.475	3.868	5.866	3.716	4.952	3.756	5.403	4.441	5.187	2.986	4.087	5.514	4.681	2.191	2.244	4.474	3.726	4.669	4.54	4.906	3.818
	23:46:28	5.483	6.105	8.176	5.333	8.601	12.764	7	4.194	8.539	4.599	7.857	5.241	7.293	6.271	5.39	7.02	7.713	3.949	8.792	9.602	3.82	4.09	10.284	6.194	6.161	7.948	3.409	8.6	6.685	7.409	4.238	7.686	6.986	5.291	9.776	6.341	3.285	4.459	7.472	6.403	4.953	6.971	6.034	7.536	5.103	11.8	5.715	4.863
	1 day, 23:40:53	4.6	6.066	5.561	5.364	4.147	7.606	7.822	6.028	6.268	5.731	6.536	3.709	8.816	4.872	4.213	7.404	4.288	3.56	4.491	7.873	5.894	6.283	6.193	7.403	4.616	4.601	4.874	3.973	8.85	6.488	7.261	8.935	5.677	6.737	4.814	7.664	6.185	6.414	5.324	7.737	8.138	4.24	4.872	4.568	5.874	8.149	5.322	4.712
	3 days, 0:00:37	3.956	4.55	4.227	3.872	3.88	3.737	3.457	5.089	3.691	3.174	4.613	6.745	4.697	3.512	4.571	6.366	4.417	3.826	3.292	4.22	6.68	5.525	4.787	6.798	5.461	5.245	2.623	4.306	7.648	5.256	3.518	3.929	5.315	3.471	3.894	5.255	6.497	3.647	5.662	4.252	4.885	4.881	4.327	4.257	5.209	4.216	4.348	5.507
	3 days, 23:50:21	5.64	4.522	8.186	5.333	4.237	4.226	3.782	4.52	7.828	4.032	7.007	5.05	6.932	3.518	4.457	8.096	3.753	6.08	7.161	5.953	6.361	5.786	6.662	4.156	6.013	5.28	3.572	4.631	8.233	6.3	5.557	4.906	6.451	4.38	5.307	4.627	3.807	4.773	9.965	6.794	3.942	5.629	5.168	4.808	5.432	6.714	5.242	4.598
	4 days, 23:54:12	3.206	8.801	4.085	3.986	3.16	6.073	8.287	4.063	4.835	5.871	7.525	6.588	5.655	4.654	7.734	8.37	6.036	6.036	7.824	4.827	5.433	5.721	6.776	8.481	6.311	5.978	3.599	5.272	3.968	6.059	5.66	10.369	7.104	6.014	5.532	4.573	4.694	5.547	9.39	5.271	4.778	5.538	4.379	5.273	5.795	6.014	7.087	5.96
	5 days, 23:56:07	4.167	7.915	4.995	6.227	7.782	5.767	6.676	5.941	8.416	5.554	6.207	6.031	5.553	7.616	5.679	6.391	5.9	5.246	5.913	4.593	2.726	9.541	6.867	5.109	6.181	3.28	6.138	8.867	4.908	5.335	5.005	5.769	5.947	9.222	5.806	6.547	5.974	5.668	3.856	3.856	4.994	5.332	4.929	11.771	7.909	5.119	6.4	4.968
	7 days, 0:06:38	3.177	4.745	5.899	5.665	4.05	4.078	5.514	7.385	4.807	3.598	4.387	4.311	4.758	4.903	4.734	5.85	4.532	5.28	4.645	5.117	4.961	8.021	4.947	4.761	4.425	4.021	7.289	5.332	10.265	7.45	4.047	4.45	6.234	5.632	5.533	5.008	5.2	5.371	6.072	5.301	5.127	3.444	4.635	5.847	6.324	4.289	6.545	5.388
	8 days, 0:07:22	5.211	6.129	5.613	4.299	4.012	5.792	4.336	5.28	6	5.06	4.147	7.053	6.177	4.669	6.162	3.893	3.678	4.954	4.671	5.23	5.19	7.946	4.159	3.111	3.882	4.084	3.553	7.507	6.801	5.701	4.608	8.208	5.275	4.926	4.314	4.278	5.405	5.921	5.87	7.372	5.17	6.527	4.801	2.979	5.337	5.423	5.781	4.35
	8 days, 23:21:10	4.349	3.322	3.86	4.144	4.254	3.773	4.3	1.167	3.744	3.748	3.758	5.307	4.637	4.833	6.06	3.702	4.747	2.635	3.587	3.57	3.247	2.621	4.745	4.063	2.799	3.33	5.145	5.952	3.779	4.793	3.228	6.419	4.098	4.975	4.828	3.86	5.661	2.788	4.261	4.157	3.029	3.087	4.747	2.748	5.098	3.508	4.832	4.184
	10 days, 0:04:25	2.748	6.816	2.49	3.259	5.345	5.995	4.822	1.412	3.28	3.404	9.321	4.565	5.043	5.351	3.113	5.08	6.744	6.183	5.011	3.247	6.877	6.747	4.702	7.485	4.186	3.266	3.171	4.794	6.084	5.321	5.159	6.748	5.695	5.403	5.25	3.946	5.663	3.299	6.093	5.946	5.016	5.006	5.729	4.022	5.131	4.313	5	4.701
	10 days, 23:54:57	3.476	5.34	6.313	4.489	6.273	6.52	5.851	1.399	4.929	4.52	6.113	3.836	4.582	5.534	5.263	4.849	4.133	5.942	7.204	5.074	4.328	5.143	3.918	5.193	4.166	5.287	5.609	8.066	5.441	5.005	4.964	6.119	4.611	6.389	5.995	5.233	6.298	1.695	6.669	5.505	4.665	6.962	5.09	6.392	5.711	5.817	5.957	5.82
	00:00:00	?????	?????	?????	?????	?????	?????	?????	?????	?????	?????	?????	?????	?????	?????	?????	?????	?????	?????	?????	?????	?????	?????	?????	?????	?????	?????	?????	?????	?????	?????	?????	?????	?????	?????	?????	?????	?????	?????	?????	?????	?????	?????	?????	?????	?????	?????	?????	?????
	00:00:00	?????	?????	?????	?????	?????	?????	?????	?????	?????	?????	?????	?????	?????	?????	?????	?????	?????	?????	?????	?????	?????	?????	?????	?????	?????	?????	?????	?????	?????	?????	?????	?????	?????	?????	?????	?????	?????	?????	?????	?????	?????	?????	?????	?????	?????	?????	?????	?????
	00:00:00	?????	?????	?????	?????	?????	?????	?????	?????	?????	?????	?????	?????	?????	?????	?????	?????	?????	?????	?????	?????	?????	?????	?????	?????	?????	?????	?????	?????	?????	?????	?????	?????	?????	?????	?????	?????	?????	?????	?????	?????	?????	?????	?????	?????	?????	?????	?????	?????
	00:00:00	?????	?????	?????	?????	?????	?????	?????	?????	?????	?????	?????	?????	?????	?????	?????	?????	?????	?????	?????	?????	?????	?????	?????	?????	?????	?????	?????	?????	?????	?????	?????	?????	?????	?????	?????	?????	?????	?????	?????	?????	?????	?????	?????	?????	?????	?????	?????	?????
	00:00:00	?????	?????	?????	?????	?????	?????	?????	?????	?????	?????	?????	?????	?????	?????	?????	?????	?????	?????	?????	?????	?????	?????	?????	?????	?????	?????	?????	?????	?????	?????	?????	?????	?????	?????	?????	?????	?????	?????	?????	?????	?????	?????	?????	?????	?????	?????	?????	?????
	00:00:00	?????	?????	?????	?????	?????	?????	?????	?????	?????	?????	?????	?????	?????	?????	?????	?????	?????	?????	?????	?????	?????	?????	?????	?????	?????	?????	?????	?????	?????	?????	?????	?????	?????	?????	?????	?????	?????	?????	?????	?????	?????	?????	?????	?????	?????	?????	?????	?????
	00:00:00	?????	?????	?????	?????	?????	?????	?????	?????	?????	?????	?????	?????	?????	?????	?????	?????	?????	?????	?????	?????	?????	?????	?????	?????	?????	?????	?????	?????	?????	?????	?????	?????	?????	?????	?????	?????	?????	?????	?????	?????	?????	?????	?????	?????	?????	?????	?????	?????
	00:00:00	?????	?????	?????	?????	?????	?????	?????	?????	?????	?????	?????	?????	?????	?????	?????	?????	?????	?????	?????	?????	?????	?????	?????	?????	?????	?????	?????	?????	?????	?????	?????	?????	?????	?????	?????	?????	?????	?????	?????	?????	?????	?????	?????	?????	?????	?????	?????	?????
	00:00:00	?????	?????	?????	?????	?????	?????	?????	?????	?????	?????	?????	?????	?????	?????	?????	?????	?????	?????	?????	?????	?????	?????	?????	?????	?????	?????	?????	?????	?????	?????	?????	?????	?????	?????	?????	?????	?????	?????	?????	?????	?????	?????	?????	?????	?????	?????	?????	?????
	00:00:00	?????	?????	?????	?????	?????	?????	?????	?????	?????	?????	?????	?????	?????	?????	?????	?????	?????	?????	?????	?????	?????	?????	?????	?????	?????	?????	?????	?????	?????	?????	?????	?????	?????	?????	?????	?????	?????	?????	?????	?????	?????	?????	?????	?????	?????	?????	?????	?????
	00:00:00	?????	?????	?????	?????	?????	?????	?????	?????	?????	?????	?????	?????	?????	?????	?????	?????	?????	?????	?????	?????	?????	?????	?????	?????	?????	?????	?????	?????	?????	?????	?????	?????	?????	?????	?????	?????	?????	?????	?????	?????	?????	?????	?????	?????	?????	?????	?????	?????
Ratio cfp2 od
	Time	A1	A2	A3	A4	A5	A6	A7	A8	A9	A10	A11	A12	B1	B2	B3	B4	B5	B6	B7	B8	B9	B10	B11	B12	C1	C2	C3	C4	C5	C6	C7	C8	C9	C10	C11	C12	D1	D2	D3	D4	D5	D6	D7	D8	D9	D10	D11	D12
	00:00:15	1438.19	983.778	1060.28	771.182	986.141	1030.83	956.298	924.282	1090.63	834.186	1044.46	913.823	1049.03	1185.86	1301.22	827.153	977.654	1029.84	1146	915.033	1128.86	1211.78	1274.38	875.399	1015.43	1230.32	896.725	759.331	1026.14	680.38	1156.57	747.627	928.914	681.818	1256.42	998.668	1063.83	955.443	747.316	615.489	960.777	899.687	727.66	686.087	686.126	851.961	1264.8	1101.94
	23:46:28	2287.17	2301.48	2000	2228.12	2005.61	1018.39	2368.05	2248.68	1374.66	2281.69	1473.68	2405.54	1558.93	1445.99	1129.48	1408.05	1801.33	2418.03	1278.48	1170.45	2282.61	2077.23	1345.61	1762.12	1526.72	991.918	1115.91	1401.87	1178.71	1261.51	1726.62	1279.8	1822.85	1620.83	1445.95	1782.18	1682.65	1254.72	989.011	1324.79	1436.78	1363.19	1605.6	1427.12	1554.85	1196.47	1742.21	2270.8
	1 day, 23:40:53	1978.17	1120.94	1395.92	2133.17	1514.72	1758.07	1012.88	1603.94	1744.68	851.993	1359.7	1495.4	1337.66	2147.32	1610.86	1882.56	1161.58	1684.98	1330.68	1438.65	1140.88	1768.92	2262.44	2555.75	1545.89	852.082	1042.68	1339.16	1859.44	1792.04	1017.34	603.497	979.104	1165.89	2037.97	1174.21	1144.41	1198.35	1915.49	1163.34	1382.35	1182.61	1095.58	1489.52	1015.76	1367.23	1480.85	1700.8
	3 days, 0:00:36	2493.89	1840.8	1531.32	2016.67	1932.91	2112.92	2082.32	1650.28	1896.42	1842.31	1393.14	1093.75	1234.18	2010.01	1731.13	2272.73	1548.09	2507.8	1537.48	1423.61	1355.14	1650.99	1345.37	1157.59	1109.06	1845.4	1502.24	1361.06	1376.7	1089.16	1138.08	967.742	1031.12	1129.52	1223.22	1108.82	1264.37	1632.52	2283.95	1532.8	1826.35	927.439	782.946	967.125	814.086	780.466	1015.42	1036.63
	3 days, 23:50:21	2169.92	1108.34	776.641	1539.62	1624.23	1599.13	1299.66	1209.88	1090.28	1180.45	979.866	1406.47	896.341	1250	934.979	2280.41	1164.19	2309.71	1294.48	1154.89	846.693	2506.7	1109.57	1397.47	1764.71	1159.6	950.21	929.9	1639.34	1018.68	1065.73	1033.64	1301.42	1220.34	1174.35	1921.43	1169.33	1039.37	1637.77	1068.97	2899.87	2173.38	949.338	1755.32	1209.05	996.287	1519.36	1184.65
	4 days, 23:54:12	3570.61	1192.89	1773.55	1875.56	2014.54	1826	1183.13	1684.21	2129.93	1979.17	1414.5	1735.02	1301.5	1523.03	1418.05	1676.23	1369.05	1971.33	1758.62	2224.74	1815.29	1921.79	1391.05	1232.36	2231.71	1885.83	1444.58	1607.55	1423.03	1144.99	1092.56	1348.07	1302.38	1560.51	1485.71	1601.47	1781.82	1940.64	1622.88	1103.72	1838.82	2397.59	1626.71	1651.27	1725.71	1431.49	1863.43	1623.66
	5 days, 23:56:07	1740.16	856.39	1187.01	1499.15	1105.53	1798.03	1271.73	1918.74	1406.07	2137.05	1657.14	1923.46	1176.04	1361.59	1236.13	1819.98	1172.71	1710.84	1930.38	2102.14	2591.72	1327.75	1476.36	2003.99	1769.72	1492.43	1381.25	1129.54	790.605	1905.7	2024.14	1878.22	1913.93	1351.04	1849.64	767.213	1399	1697.48	1277.17	1717.69	1613.83	1940.93	1217.39	1004.18	1800.22	2170.16	2257.18	2096.13
	7 days, 0:06:38	2452.49	1815.81	1353.08	1196.05	1418.53	1563.46	1323.53	1053.66	1143.25	1319.28	1434.03	1269.07	1257.61	1542.45	1367.24	1137.8	1419.36	1343.09	1371.73	1243.18	1335.06	944.373	1106.8	1402.98	1658.65	1812.6	1442.9	1169.23	631.749	734.206	1215.06	1055.25	1146.95	1249.29	1041.78	1414.2	1384.73	1118.55	983.923	1009.24	1241.63	1337.4	962.536	921.895	1070.56	1324.96	968.343	1282.71
	8 days, 0:07:22	2465.28	2432.58	1822.97	2306.03	2552.74	1713.01	2376.13	2669.74	1397.59	2282.88	2520.32	1893.1	1819.1	1686.28	1997.97	2422.73	2276.16	2362.46	2281.6	2306.92	2004.24	1714.88	2058.82	2519.51	2287.71	2279.69	1749.54	1526.55	1374.27	2043.57	2150.21	1487.92	1964.66	2132.94	2328.16	1982.92	1426.37	2171.12	1720.98	1178.31	1593.19	1641.79	2441.63	2368.42	1786.77	1948.45	2098.12	2140.15
	8 days, 23:21:09	3009.08	1241.66	3066.83	2539.68	2772.28	2943.98	1934.83	10252.3	2482.99	2379.42	3127.36	2347.83	2457.14	2385.97	1958.04	2641.51	1902.02	2580.97	1772.28	2263.78	2502.66	2663.89	2203.02	2584.01	2709.2	2139.25	2013.17	2118.83	1948.42	2081.95	2334.97	1726.91	2507.68	2053.66	2807.57	3094.43	1197.83	3170.14	2060.91	1967.04	2237.7	1713.48	2418.56	2573.88	1770.93	2575.29	2006.51	3057.64
	10 days, 0:04:25	1776.4	464.877	1080.49	1201.45	750.127	1013.92	1253.48	4501.56	1437.42	1664.57	700	1597.47	1109.93	724.638	1340.05	1118.88	865.885	1175.24	1118.38	1414.73	1158.58	1054.74	1799.16	1553.67	1198.61	1334.72	1145.25	1125.47	1126.49	1257.33	1093.59	772.595	922.983	1128.93	1289.42	2000	755.116	1856.48	849.269	1114.08	1228.65	1122.11	938.383	1564.91	1226.35	1421.88	1710.53	1703.93
	10 days, 23:54:57	2883.3	1952.36	1490.33	2545.25	1900.65	2478.53	1811.77	21680.9	2338.9	2280.93	1713.36	1917.4	1608.96	1266	1970.34	1739.94	2164.1	1718.59	1442.12	2149.78	1809.34	2026.43	2398.75	1968.68	2144.4	1799.04	1513.03	1533.26	1759.93	1794.12	1643.43	1288.17	1681.08	1543.44	1809	1550.27	1438.85	8270.54	1513.29	2001.82	2153.28	1260.1	1473.77	1398.48	1634.86	1666.67	1766.38	1797.84
	00:00:00	?????	?????	?????	?????	?????	?????	?????	?????	?????	?????	?????	?????	?????	?????	?????	?????	?????	?????	?????	?????	?????	?????	?????	?????	?????	?????	?????	?????	?????	?????	?????	?????	?????	?????	?????	?????	?????	?????	?????	?????	?????	?????	?????	?????	?????	?????	?????	?????
	00:00:00	?????	?????	?????	?????	?????	?????	?????	?????	?????	?????	?????	?????	?????	?????	?????	?????	?????	?????	?????	?????	?????	?????	?????	?????	?????	?????	?????	?????	?????	?????	?????	?????	?????	?????	?????	?????	?????	?????	?????	?????	?????	?????	?????	?????	?????	?????	?????	?????
	00:00:00	?????	?????	?????	?????	?????	?????	?????	?????	?????	?????	?????	?????	?????	?????	?????	?????	?????	?????	?????	?????	?????	?????	?????	?????	?????	?????	?????	?????	?????	?????	?????	?????	?????	?????	?????	?????	?????	?????	?????	?????	?????	?????	?????	?????	?????	?????	?????	?????
	00:00:00	?????	?????	?????	?????	?????	?????	?????	?????	?????	?????	?????	?????	?????	?????	?????	?????	?????	?????	?????	?????	?????	?????	?????	?????	?????	?????	?????	?????	?????	?????	?????	?????	?????	?????	?????	?????	?????	?????	?????	?????	?????	?????	?????	?????	?????	?????	?????	?????
	00:00:00	?????	?????	?????	?????	?????	?????	?????	?????	?????	?????	?????	?????	?????	?????	?????	?????	?????	?????	?????	?????	?????	?????	?????	?????	?????	?????	?????	?????	?????	?????	?????	?????	?????	?????	?????	?????	?????	?????	?????	?????	?????	?????	?????	?????	?????	?????	?????	?????
	00:00:00	?????	?????	?????	?????	?????	?????	?????	?????	?????	?????	?????	?????	?????	?????	?????	?????	?????	?????	?????	?????	?????	?????	?????	?????	?????	?????	?????	?????	?????	?????	?????	?????	?????	?????	?????	?????	?????	?????	?????	?????	?????	?????	?????	?????	?????	?????	?????	?????
	00:00:00	?????	?????	?????	?????	?????	?????	?????	?????	?????	?????	?????	?????	?????	?????	?????	?????	?????	?????	?????	?????	?????	?????	?????	?????	?????	?????	?????	?????	?????	?????	?????	?????	?????	?????	?????	?????	?????	?????	?????	?????	?????	?????	?????	?????	?????	?????	?????	?????
	00:00:00	?????	?????	?????	?????	?????	?????	?????	?????	?????	?????	?????	?????	?????	?????	?????	?????	?????	?????	?????	?????	?????	?????	?????	?????	?????	?????	?????	?????	?????	?????	?????	?????	?????	?????	?????	?????	?????	?????	?????	?????	?????	?????	?????	?????	?????	?????	?????	?????
	00:00:00	?????	?????	?????	?????	?????	?????	?????	?????	?????	?????	?????	?????	?????	?????	?????	?????	?????	?????	?????	?????	?????	?????	?????	?????	?????	?????	?????	?????	?????	?????	?????	?????	?????	?????	?????	?????	?????	?????	?????	?????	?????	?????	?????	?????	?????	?????	?????	?????
	00:00:00	?????	?????	?????	?????	?????	?????	?????	?????	?????	?????	?????	?????	?????	?????	?????	?????	?????	?????	?????	?????	?????	?????	?????	?????	?????	?????	?????	?????	?????	?????	?????	?????	?????	?????	?????	?????	?????	?????	?????	?????	?????	?????	?????	?????	?????	?????	?????	?????
	00:00:00	?????	?????	?????	?????	?????	?????	?????	?????	?????	?????	?????	?????	?????	?????	?????	?????	?????	?????	?????	?????	?????	?????	?????	?????	?????	?????	?????	?????	?????	?????	?????	?????	?????	?????	?????	?????	?????	?????	?????	?????	?????	?????	?????	?????	?????	?????	?????	?????
[truncated: 49 more columns]

## Sheet: Plate 7 - mediumC_30
Software Version	2001-09-02
Experiment File Path:	C:\Users\Public\Documents\Experiments\Bella\20190512_EE24.12.xpt
Protocol File Path:	C:\Users\Public\Documents\Protocols\Bella\EE22.prt
Plate Number	Plate 7
Date	2019-05-01
Time	10:27:52
Reader Type:	Synergy H1
Reader Serial Number:	266878
Reading Type	Reader
Procedure Details
Plate Type	Nunc 96 flat bottom generic
Discontinuous Kinetics	Runtime 22:00:00 (D:HH:MM), Interval 1:00:00, 23 Reads
	Pause after each run
Eject plate on completion
Shake	Double Orbital: 0:10 (MM:SS)
	Frequency: 365 cpm (2 mm)
Read	Absorbance Endpoint
	Full Plate
	Wavelengths: 600
	Read Speed: Sweep, Delay: 0 msec, Measurements/Data Point: 1
Shake	Linear: 0:02 (MM:SS)
	Frequency: 731 cpm (2 mm)
Read	Fluorescence Endpoint
	Full Plate
	Filter Set 1
	Excitation: 515, Emission: 545
	Optics: Top, Gain: 100
	Filter Set 2
	Excitation: 515, Emission: 545
	Optics: Top, Gain: 120
	Light Source: Xenon Flash, Lamp Energy: High
	Read Speed: Sweep, Delay: 0 msec, Measurements/Data Point: 1
	Read Height: 7 mm
Shake	Linear: 0:02 (MM:SS)
	Frequency: 731 cpm (2 mm)
Read	Fluorescence Endpoint
	Full Plate
	Filter Set 1
	Excitation: 425, Emission: 475
	Optics: Top, Gain: 100
	Filter Set 2
	Excitation: 425, Emission: 475
	Optics: Top, Gain: 60
	Light Source: Xenon Flash, Lamp Energy: High
	Read Speed: Sweep, Delay: 0 msec, Measurements/Data Point: 1
	Read Height: 7 mm
Layout
		1	2	3	4	5	6	7	8	9	10	11	12
	A	SPL1	SPL5	SPL9	SPL13	SPL17	SPL21	SPL25	SPL29	SPL33	SPL37	SPL44	SPL51	Well ID
	B	SPL2	SPL6	SPL10	SPL14	SPL18	SPL22	SPL26	SPL30	SPL34	SPL38	SPL45	SPL52	Well ID
	C	SPL3	SPL7	SPL11	SPL15	SPL19	SPL23	SPL27	SPL31	SPL35	SPL39	SPL46	SPL53	Well ID
	D	SPL4	SPL8	SPL12	SPL16	SPL20	BLK	BLK	SPL32	SPL36	SPL40	SPL47	SPL54	Well ID
	E	SPL58	SPL62	SPL66	SPL70	SPL74	SPL78	SPL82	SPL86	SPL90	SPL41	SPL48	SPL55	Well ID
	F	SPL59	SPL63	SPL67	SPL71	SPL75	SPL79	SPL83	SPL87	SPL91	SPL42	SPL49	SPL56	Well ID
	G	SPL60	SPL64	SPL68	SPL72	SPL76	SPL80	SPL84	SPL88	SPL92	SPL43	SPL50	SPL57	Well ID
	H	SPL61	SPL65	SPL69	SPL73	SPL77	BLK	BLK	SPL89	SPL93	SPL94	SPL95	SPL1	Well ID
Read 1:600
	Time	T° Read 1:600	A1	A2	A3	A4	A5	A6	A7	A8	A9	A10	A11	A12	B1	B2	B3	B4	B5	B6	B7	B8	B9	B10	B11	B12	C1	C2	C3	C4	C5	C6	C7	C8	C9	C10	C11	C12	D1	D2	D3	D4	D5	D6	D7	D8	D9	D10	D11
	00:00:11	34.2	0.256	0.231	0.271	0.268	0.256	0.272	0.286	0.254	0.217	0.203	0.227	0.203	0.258	0.303	0.246	0.26	0.272	0.279	0.287	0.252	0.269	0.248	0.199	0.189	0.284	0.225	0.316	0.315	0.315	0.316	0.323	0.326	0.34	0.279	0.226	0.17	0.326	0.315	0.348	0.389	0.379	0.383	0.368	0.358	0.332	0.278	0.201
	23:45:29	27.1	0.112	0.105	0.123	0.119	0.132	0.148	0.141	0.139	0.153	0.164	0.183	0.208	0.099	0.128	0.126	0.144	0.149	0.168	0.155	0.187	0.197	0.19	0.224	0.193	0.103	0.118	0.137	0.151	0.175	0.2	0.187	0.221	0.235	0.252	0.209	0.178	0.104	0.117	0.167	0.2	0.235	0.241	0.253	0.253	0.26	0.27	0.165
	1 day, 23:39:56	34.2	0.171	0.131	0.155	0.187	0.163	0.188	0.172	0.164	0.194	0.182	0.212	0.184	0.117	0.147	0.13	0.12	0.126	0.128	0.204	0.151	0.137	0.138	0.218	0.17	0.148	0.14	0.18	0.204	0.225	0.142	0.196	0.161	0.229	0.198	0.18	0.147	0.162	0.153	0.172	0.214	0.221	0.217	0.215	0.204	0.199	0.158	0.152
	2 days, 23:59:45	26.9	0.144	0.188	0.142	0.117	0.096	0.125	0.113	0.119	0.147	0.138	0.095	0.112	0.136	0.166	0.103	0.121	0.107	0.105	0.111	0.1	0.095	0.105	0.093	0.124	0.164	0.16	0.121	0.121	0.121	0.101	0.13	0.096	0.107	0.089	0.099	0.139	0.121	0.1	0.127	0.115	0.134	0.114	0.11	0.114	0.1	0.104	0.105
	3 days, 23:50:00	26.8	0.109	0.144	0.123	0.12	0.142	0.146	0.126	0.116	0.146	0.133	0.111	0.097	0.117	0.158	0.104	0.155	0.129	0.146	0.115	0.146	0.12	0.123	0.117	0.124	0.131	0.155	0.153	0.148	0.155	0.127	0.13	0.15	0.136	0.144	0.132	0.136	0.142	0.148	0.115	0.145	0.148	0.144	0.142	0.147	0.132	0.119	0.112
	4 days, 23:53:16	26.8	0.103	0.131	0.134	0.139	0.145	0.128	0.129	0.115	0.155	0.129	0.157	0.101	0.141	0.147	0.123	0.131	0.154	0.143	0.11	0.117	0.105	0.113	0.158	0.124	0.152	0.113	0.142	0.132	0.132	0.12	0.146	0.138	0.149	0.173	0.161	0.15	0.165	0.142	0.118	0.141	0.137	0.157	0.158	0.16	0.164	0.117	0.142
	5 days, 23:55:22	26.9	0.091	0.097	0.113	0.12	0.1	0.092	0.091	0.101	0.116	0.115	0.115	0.105	0.111	0.101	0.084	0.094	0.113	0.103	0.102	0.113	0.095	0.117	0.1	0.11	0.126	0.092	0.111	0.101	0.115	0.1	0.099	0.131	0.107	0.115	0.12	0.113	0.104	0.112	0.092	0.108	0.11	0.114	0.129	0.109	0.108	0.099	0.1
	7 days, 0:05:33	27	0.136	0.129	0.117	0.123	0.132	0.151	0.124	0.107	0.143	0.133	0.14	0.137	0.138	0.15	0.149	0.139	0.158	0.132	0.164	0.132	0.125	0.13	0.119	0.126	0.133	0.15	0.136	0.143	0.149	0.135	0.139	0.131	0.111	0.147	0.13	0.148	0.127	0.149	0.138	0.129	0.129	0.132	0.127	0.149	0.12	0.142	0.14
	8 days, 0:06:36	26.9	0.11	0.099	0.126	0.131	0.101	0.143	0.125	0.114	0.129	0.111	0.114	0.124	0.123	0.104	0.109	0.101	0.114	0.095	0.122	0.122	0.098	0.094	0.103	0.133	0.148	0.115	0.104	0.139	0.122	0.098	0.09	0.126	0.096	0.127	0.102	0.107	0.092	0.13	0.122	0.15	0.119	0.102	0.118	0.098	0.1	0.097	0.101
	8 days, 23:20:12	27.3	0.118	0.108	0.141	0.132	0.144	0.142	0.125	0.106	0.132	0.131	0.123	0.13	0.126	0.14	0.111	0.144	0.143	0.113	0.148	0.143	0.123	0.127	0.116	0.121	0.127	0.114	0.115	0.108	0.141	0.125	0.128	0.146	0.1	0.138	0.122	0.136	0.108	0.135	0.132	0.16	0.128	0.113	0.168	0.137	0.109	0.102	0.137
	10 days, 0:03:24	27.1	0.152	0.359	0.174	0.21	0.18	0.305	0.236	0.218	0.19	0.107	0.131	0.131	0.174	0.132	0.148	0.147	0.119	0.131	0.186	0.141	0.097	0.109	0.131	0.1	0.337	0.154	0.239	0.186	0.176	0.152	0.146	0.173	0.108	0.205	0.172	0.095	0.323	0.146	0.188	0.144	0.135	0.123	0.267	0.145	0.153	0.117	0.15
	10 days, 23:48:38	26.9	0.107	0.103	0.1	0.116	0.097	0.113	0.131	0.099	0.124	0.12	0.116	0.137	0.124	0.138	0.098	0.112	0.125	0.106	0.145	0.133	0.125	0.127	0.113	0.116	0.116	0.104	0.11	0.1	0.121	0.134	0.126	0.14	0.125	0.127	0.132	0.13	0.103	0.121	0.118	0.117	0.102	0.117	0.138	0.118	0.094	0.126	0.131
	00:00:00
	00:00:00
	00:00:00
	00:00:00
	00:00:00
	00:00:00
	00:00:00
	00:00:00
	00:00:00
	00:00:00
	00:00:00
Read 2:515,545
	Time	T° Read 2:515,545	A1	A2	A3	A4	A5	A6	A7	A8	A9	A10	A11	A12	B1	B2	B3	B4	B5	B6	B7	B8	B9	B10	B11	B12	C1	C2	C3	C4	C5	C6	C7	C8	C9	C10	C11	C12	D1	D2	D3	D4	D5	D6	D7	D8	D9	D10	D11
	00:00:03	34.2	243	245	289	229	307	234	225	249	249	177	210	153	226	258	238	204	139	193	180	157	161	195	158	207	221	217	194	205	222	197	210	178	184	134	212	211	206	227	244	151	152	238	158	152	171	175	164
	23:45:21	27.1	193	181	165	131	207	307	255	200	196	253	261	313	253	275	200	196	343	249	277	252	303	163	171	351	245	193	254	214	290	248	338	297	304	224	192	270	244	167	189	187	237	214	225	218	225	334	337
	1 day, 23:39:49	34.2	267	254	299	219	213	229	116	240	194	192	172	246	208	351	240	219	254	165	196	176	298	302	189	262	145	416	200	167	204	225	244	274	120	126	181	239	261	230	428	237	148	190	125	205	194	456	157
	2 days, 23:59:37	26.9	492	305	297	236	206	257	123	183	422	212	227	256	254	292	322	302	192	205	152	244	381	329	217	369	286	459	146	138	191	192	350	152	201	236	246	293	225	259	384	122	294	150	215	348	223	441	126
	3 days, 23:49:53	26.8	421	402	430	217	290	325	163	165	404	293	182	121	212	243	426	329	137	130	163	264	304	311	173	515	231	441	266	192	326	168	418	348	188	330	276	282	262	227	496	259	331	260	252	396	181	455	172
	4 days, 23:53:08	26.8	463	425	332	259	244	312	291	168	447	323	288	281	240	274	433	339	279	135	154	223	417	428	235	280	326	502	221	242	385	268	333	463	278	318	217	393	217	361	417	156	306	327	272	393	273	451	207
	5 days, 23:55:15	26.9	313	352	460	238	357	226	130	238	488	265	400	223	251	226	515	328	317	194	271	435	477	439	192	340	220	322	172	232	425	262	342	369	176	365	225	377	127	200	349	122	354	232	242	278	177	508	172
	7 days, 0:05:25	27	583	401	341	338	372	301	237	188	446	329	471	303	290	248	631	328	337	215	278	467	474	487	239	603	219	501	206	264	384	196	343	404	289	327	419	394	287	241	584	186	372	206	290	329	181	658	188
	8 days, 0:06:29	26.9	434	412	517	376	448	336	275	259	417	469	370	350	258	375	536	282	419	214	424	414	347	372	236	467	330	575	202	192	396	279	243	491	183	270	300	366	266	276	476	418	388	214	499	395	298	433	244
	8 days, 23:20:04	27.3	546	345	307	334	407	305	152	163	341	369	451	334	253	275	452	433	301	281	201	477	461	527	215	481	289	459	285	219	529	404	413	356	281	379	364	356	215	325	485	820	362	229	560	334	255	557	299
	10 days, 0:03:16	27.1	397	447	436	321	353	284	181	258	377	251	289	270	271	176	371	253	155	228	284	304	204	333	160	374	272	399	283	277	353	429	253	448	287	334	284	321	256	325	465	473	280	162	379	217	225	415	344
	10 days, 23:48:30	26.9	414	408	362	483	395	282	299	205	443	354	569	405	357	334	468	392	340	413	366	445	579	649	219	617	248	369	326	242	550	426	336	510	329	424	316	340	240	335	596	500	359	299	504	410	212	676	458
	00:00:00
	00:00:00
	00:00:00
	00:00:00
	00:00:00
	00:00:00
	00:00:00
	00:00:00
	00:00:00
	00:00:00
	00:00:00
Read 2:515,545[2]
	Time	T° Read 2:515,545[2]	A1	A2	A3	A4	A5	A6	A7	A8	A9	A10	A11	A12	B1	B2	B3	B4	B5	B6	B7	B8	B9	B10	B11	B12	C1	C2	C3	C4	C5	C6	C7	C8	C9	C10	C11	C12	D1	D2	D3	D4	D5	D6	D7	D8	D9	D10	D11
	00:00:15	34.2	1017	868	923	841	602	877	534	689	787	739	901	593	891	872	746	1048	831	904	750	778	775	813	830	890	1035	885	596	971	945	1025	553	629	916	791	614	749	783	773	896	1071	623	789	717	790	768	865	876
	23:45:33	27.1	1252	866	910	984	868	1169	896	913	868	1209	903	905	1045	1242	879	960	686	695	994	997	875	793	995	753	711	944	807	868	785	913	728	972	750	982	842	1065	1020	952	971	826	1046	1231	852	702	884	1172	934
	1 day, 23:40:01	34.2	1678	811	871	879	927	1051	639	957	888	541	825	870	719	933	1662	1035	886	993	946	792	1841	1230	803	558	765	1505	998	728	796	870	867	965	1014	961	682	849	788	855	2128	1101	971	648	855	810	715	1908	958
	2 days, 23:59:49	26.9	1697	1213	1595	870	838	1027	935	767	1193	1024	987	576	757	1033	1355	953	997	807	869	835	1158	1601	755	1729	695	1566	867	588	696	708	1380	1189	917	1174	760	1085	918	773	1898	815	1331	690	582	1163	989	1422	727
	3 days, 23:50:05	26.8	1530	1629	1608	1121	1095	1180	990	1046	1327	1461	840	801	1038	944	1600	1421	848	1345	964	1031	1703	1905	1041	1734	1163	2061	882	1031	1808	820	1365	1353	856	841	1099	1244	870	1115	1885	1072	1524	860	924	1321	860	1608	1016
	4 days, 23:53:20	26.8	1711	1358	1554	1196	1173	1310	783	958	1656	1475	985	949	833	1541	1563	1412	943	1007	1286	1066	1436	1652	766	1929	1624	1875	941	967	1620	742	1263	1797	912	1376	965	1549	1042	983	2257	991	1680	1094	1374	1167	886	1816	981
	5 days, 23:55:27	26.9	1668	1258	1336	1273	1308	1002	649	823	1677	1327	1334	789	995	1171	1883	1364	1124	957	1009	1613	1609	1720	959	1758	902	1471	706	860	1661	571	1357	1767	1089	1672	1820	1319	810	1046	1642	845	1214	948	1111	1187	1011	2114	1087
	7 days, 0:05:37	27	2124	1444	1415	1199	1417	1722	811	1278	1555	1645	2074	1076	978	1274	2451	1576	1457	955	1077	1696	1830	2122	666	1940	997	2134	1049	970	1757	1131	1269	1582	929	1575	1513	1634	996	1146	2270	947	1533	664	1406	1692	623	2427	1090
	8 days, 0:06:41	26.9	2252	1531	2228	1501	1601	1305	1284	954	1484	1323	1796	1197	1154	1606	2091	1254	1594	1160	1155	1585	1669	1688	1044	2173	1288	2047	883	1229	1794	1092	1610	1768	1249	1429	1344	1349	740	1116	2035	1677	1570	1068	1910	1069	981	2047	928
	8 days, 23:20:16	27.3	2284	1358	1861	1494	1777	1417	1249	1129	1488	1135	2045	1576	1160	1282	2125	1843	1297	1088	1139	1863	2079	2205	951	1912	976	1622	792	854	1931	1827	1550	2143	1049	1461	1869	1656	1324	1292	2024	3420	1635	943	2644	1799	1139	2189	1102
	10 days, 0:03:28	27.1	1805	1749	1865	1627	1517	1153	1457	1022	1638	1622	1256	1181	877	946	1304	1069	1101	666	1254	1567	1245	1428	967	1358	1059	1231	1025	749	1736	1651	1134	1766	1179	1215	1150	853	924	1218	1784	1944	921	761	1891	1564	1205	1512	1327
	10 days, 23:48:42	26.9	1947	1916	1939	1980	1513	864	1089	1040	1564	1285	1892	1887	1337	1099	2039	1678	1448	1320	1756	1868	2109	1807	782	2398	1415	1671	1399	1075	2358	2056	1776	1711	1282	1526	2008	1413	1103	1147	2242	1619	1622	918	1888	1709	992	2554	1577
	00:00:00
	00:00:00
	00:00:00
	00:00:00
	00:00:00
	00:00:00
	00:00:00
	00:00:00
	00:00:00
	00:00:00
	00:00:00
Read 3:425,475
	Time	T° Read 3:425,475	A1	A2	A3	A4	A5	A6	A7	A8	A9	A10	A11	A12	B1	B2	B3	B4	B5	B6	B7	B8	B9	B10	B11	B12	C1	C2	C3	C4	C5	C6	C7	C8	C9	C10	C11	C12	D1	D2	D3	D4	D5	D6	D7	D8	D9	D10	D11
	00:00:03	34.1	11314	10223	10267	10655	10338	10303	9646	9597	8545	8659	9135	8970	12313	13318	11433	10716	10652	10721	9759	9780	9213	8914	8486	8984	13692	12090	12653	11160	11179	11376	10836	9659	10172	8764	7744	8712	13866	14162	12906	11890	11994	11139	9763	9371	8640	8403	7986
	23:45:21	27.1	6645	7332	7540	7820	7884	9697	7982	8318	7472	7636	7874	8007	6071	9356	7575	8084	7183	7814	8106	7986	9628	8383	7642	7042	6077	7189	7210	7844	8356	8669	9363	8473	8692	8029	7443	6782	6284	7647	10338	7131	7872	7937	7903	8351	7359	19463	6367
	1 day, 23:39:48	34.1	26158	8337	7974	8915	7797	10521	8243	8845	8746	8763	7601	7710	7481	10453	27367	9311	7726	8382	8570	8454	29356	26981	8303	11814	8554	22546	8604	8687	8817	8605	10973	8551	8314	8977	7850	8887	8244	8686	40385	8893	8535	8530	8072	11734	8533	45901	7033
	2 days, 23:59:37	26.9	41465	23893	26189	8122	7876	9780	7566	7894	32041	12404	7813	8579	8247	11553	30755	20892	8499	8316	8262	8715	27516	31313	8185	33699	9158	39814	7569	7636	12899	7375	20482	8033	7727	7085	8199	20382	8359	7410	36029	7965	20089	8197	8176	21000	8051	36025	8468
	3 days, 23:49:53	26.8	32642	28420	26310	7256	14094	9559	7522	7168	29813	16000	7841	7827	6733	8936	32173	21983	7578	7494	7342	17222	32105	35456	7702	30737	8675	43158	6779	7084	23373	7375	18631	19132	7590	11175	12838	23312	7251	7208	30352	7309	18676	7688	8463	19516	8315	40679	7410
	4 days, 23:53:08	26.8	33504	29352	29416	9201	21633	8567	7650	7468	30248	18080	14363	6186	7680	8953	40129	22793	8577	7913	8289	20941	29460	33417	7262	29262	9400	31954	7731	7759	24533	7626	21359	22954	8322	18784	18515	24847	7592	7768	36134	7344	19673	7916	9799	23577	7559	41161	7630
	5 days, 23:55:14	26.9	30396	27158	27281	16694	19054	8084	7240	7273	30444	22631	22560	8559	8080	8306	30269	21413	12025	7811	9159	21507	32892	37206	6768	31363	8160	27160	6949	6841	22323	6992	17720	20867	7015	21630	20962	23827	6965	7775	28932	7966	18476	7543	14940	20784	7224	42146	7104
	7 days, 0:05:25	27	37473	26968	23968	18241	23921	10344	7298	6361	29282	27017	44221	15331	7673	11245	48586	25848	17994	6790	15393	23388	39668	42851	6493	37798	7014	44858	6263	6434	24983	6576	23418	23403	7178	23472	23747	27465	5988	8135	43138	6450	20692	6799	21920	25224	6343	52721	6447
	8 days, 0:06:29	26.9	37978	28471	40645	31770	24368	8672	12541	7831	31212	25615	38115	23630	9831	9295	44936	25061	24906	8289	22829	32530	33518	32744	8050	42834	10387	43322	7094	7649	34902	13840	20270	33531	9787	24079	23993	25553	7698	9776	44721	22953	23481	7139	36982	22011	8440	41744	9546
	8 days, 23:20:04	27.3	43136	27165	37989	31769	31896	8908	15241	6951	25646	25823	40179	30011	10765	9510	42195	30555	25860	8450	23776	46321	39400	43114	7741	41659	10784	39696	7639	7463	42255	29664	26523	42869	9220	28486	26484	31070	8144	9845	42797	63999	24408	7383	57907	27486	8602	46494	17218
	10 days, 0:03:16	27.1	41561	42234	31707	32546	26486	8955	17511	9660	29492	20048	30862	21098	10232	7594	36482	19595	18517	12700	22851	31569	26025	27496	7482	27061	9529	30653	14091	9270	36823	35357	20015	33387	14967	26763	19820	21327	9867	8500	36891	37213	17876	7262	37572	22040	10095	35396	30993
	10 days, 23:48:30	26.9	39838	30013	28834	33642	27029	7934	18844	9103	27941	27561	44439	33727	10266	9337	38524	30369	25255	21848	30305	35538	46958	46562	8374	52703	8636	39326	16635	9795	39102	38775	26025	35096	28846	31169	35892	34644	8851	8698	49276	40735	26818	7437	35632	28814	9549	57593	35802
	00:00:00
	00:00:00
	00:00:00
	00:00:00
	00:00:00
	00:00:00
	00:00:00
	00:00:00
	00:00:00
	00:00:00
	00:00:00
Read 3:425,475[2]
	Time	T° Read 3:425,475[2]	A1	A2	A3	A4	A5	A6	A7	A8	A9	A10	A11	A12	B1	B2	B3	B4	B5	B6	B7	B8	B9	B10	B11	B12	C1	C2	C3	C4	C5	C6	C7	C8	C9	C10	C11	C12	D1	D2	D3	D4	D5	D6	D7	D8	D9	D10	D11
	00:00:15	34.1	288	241	210	273	316	225	240	199	178	232	184	255	295	328	240	281	234	319	236	273	211	224	154	236	356	291	271	305	257	283	229	230	287	258	173	167	310	361	342	316	318	252	247	200	236	239	191
	23:45:33	27.1	146	165	148	159	189	201	210	249	137	221	178	184	178	232	193	214	189	190	164	149	222	162	234	199	112	185	159	248	171	257	184	212	247	182	172	172	162	166	295	163	234	212	233	184	191	438	124
	1 day, 23:40:00	34.1	641	177	177	188	245	307	183	169	155	201	221	197	207	242	638	246	187	180	157	164	733	686	168	274	236	587	236	205	192	171	290	202	212	211	190	168	152	223	985	230	182	185	177	297	185	1144	149
	2 days, 23:59:49	26.9	1031	537	577	193	229	185	140	241	739	252	218	171	198	254	689	490	189	169	232	199	660	734	196	832	227	950	176	177	264	174	465	211	160	162	211	550	184	180	923	208	546	189	201	504	227	887	235
	3 days, 23:50:05	26.8	828	697	630	152	352	272	228	237	704	383	216	183	145	178	738	518	171	165	152	439	824	881	158	737	173	1014	181	221	550	144	463	516	152	226	293	524	204	170	765	125	453	197	244	525	178	962	178
	4 days, 23:53:20	26.8	889	701	746	207	536	190	215	207	714	462	356	162	229	226	957	586	233	177	236	461	690	844	145	696	251	854	170	193	573	125	515	574	181	437	415	572	177	176	850	212	541	225	270	520	176	984	164
	5 days, 23:55:26	26.9	701	661	706	415	398	185	194	157	745	536	569	245	156	212	711	521	252	171	254	503	790	875	204	766	152	667	150	175	554	126	429	533	163	467	514	595	156	179	662	240	460	149	352	520	164	1001	200
	7 days, 0:05:37	27	939	671	584	406	545	266	218	156	695	593	1035	416	206	279	1231	657	429	153	408	564	977	1041	174	890	131	1105	192	127	634	147	563	563	132	585	616	661	216	213	1067	112	517	156	514	613	121	1309	179
	8 days, 0:06:41	26.9	891	679	1039	777	580	238	307	217	820	650	876	567	237	153	1065	601	614	217	616	789	844	751	168	1020	197	1062	196	224	876	321	498	859	261	591	567	699	170	255	1134	517	543	194	961	550	157	995	258
	8 days, 23:20:16	27.3	1118	605	888	771	754	213	387	233	576	636	976	808	288	225	1019	808	603	241	532	1088	963	1076	178	1029	279	991	142	189	1023	753	649	1142	210	690	667	759	159	268	1033	1576	548	179	1399	668	151	1129	397
	10 days, 0:03:28	27.1	920	925	762	755	595	233	399	244	766	475	815	475	303	179	873	430	413	306	570	747	653	654	215	730	282	700	326	241	870	885	489	829	349	646	422	493	280	230	951	921	463	219	902	499	219	836	734
	10 days, 23:48:42	26.9	978	719	752	809	706	196	485	224	691	643	1102	804	293	181	989	719	650	517	745	865	1148	1252	211	1316	237	950	421	205	940	906	675	825	688	779	797	862	258	195	1152	1005	629	177	858	734	201	1458	891
	00:00:00
	00:00:00
	00:00:00
	00:00:00
	00:00:00
	00:00:00
	00:00:00
	00:00:00
	00:00:00
	00:00:00
	00:00:00
Ratio yfp od
	Time	A1	A2	A3	A4	A5	A6	A7	A8	A9	A10	A11	A12	B1	B2	B3	B4	B5	B6	B7	B8	B9	B10	B11	B12	C1	C2	C3	C4	C5	C6	C7	C8	C9	C10	C11	C12	D1	D2	D3	D4	D5	D6	D7	D8	D9	D10	D11	D12
	00:00:03	947.738	1059.23	1065.63	854.797	1200.16	861.561	787.264	979.158	1146.41	874.074	925.926	753.323	875.969	852.048	967.48	784.012	511.594	691.261	626.523	622.522	597.846	787.561	795.169	1096.98	777.348	965.732	614.507	650.587	703.868	623.418	649.351	546.683	541.973	480.631	939.716	1241.91	631.708	719.949	700.747	388.275	401.267	620.924	429.465	424.581	515.06	630.176	816.733	1074.17
	23:45:21	1717.08	1727.1	1346.94	1103.62	1574.14	2070.13	1811.08	1440.92	1281.88	1543.62	1428.57	1502.64	2547.84	2156.86	1584.79	1363.95	2302.01	1483.91	1788.25	1344.72	1541.98	856.092	763.052	1821.48	2371.73	1634.21	1848.62	1414.41	1652.42	1238.14	1803.63	1345.11	1294.72	889.242	919.1	1516	2355.21	1426.13	1135.13	933.134	1007.65	887.599	890.736	862.001	866.384	1238.41	2041.19	1655.4
	1 day, 23:39:49	1559.58	1940.41	1926.55	1169.87	1303.55	1218.73	673.244	1465.2	1000	1054.94	811.321	1340.6	1782.35	2391.01	1846.15	1831.1	2020.68	1285.05	958.435	1164.79	2183.15	2191.58	868.966	1542.08	977.089	2977.81	1108.65	818.226	907.473	1580.06	1242.36	1700.81	524.017	637.329	1005.56	1623.64	1608.13	1504.25	2481.16	1108.51	668.473	875.98	580.855	1005.89	975.365	2887.9	1032.89	1645.02
	2 days, 23:59:37	3416.67	1621.48	2088.61	2018.82	2139.15	2054.36	1090.43	1540.4	2866.85	1531.79	2399.58	2281.64	1864.9	1754.81	3120.16	2504.15	1797.75	1944.97	1371.84	2449.8	4031.75	3133.33	2335.84	2968.62	1746.03	2861.6	1210.61	1145.23	1579.82	1908.55	2686.11	1581.69	1885.55	2663.66	2482.34	2106.4	1867.22	2582.25	3035.57	1062.72	2197.31	1313.48	1952.77	3052.63	2225.55	4236.31	1200	1649.37
	3 days, 23:49:53	3880.18	2785.86	3495.93	1811.35	2042.25	2218.43	1290.58	1426.1	2761.45	2211.32	1642.6	1242.3	1808.87	1534.09	4096.15	2129.45	1062.84	888.585	1413.7	1804.51	2541.81	2520.26	1477.37	4156.58	1757.99	2843.33	1734.03	1296.42	2100.51	1328.06	3212.91	2313.83	1381.34	2298.05	2094.08	2073.53	1838.6	1534.82	4313.04	1791.15	2241.03	1800.55	1774.65	2692.05	1375.38	3823.53	1538.46	2167.44
	4 days, 23:53:08	4495.15	3254.21	2479.46	1861.97	1682.76	2439.41	2248.84	1462.14	2883.87	2496.14	1836.73	2787.7	1702.13	1867.76	3520.32	2595.71	1810.51	940.767	1394.93	1905.98	3975.21	3797.69	1491.12	2267.21	2146.15	4446.41	1556.34	1834.72	2923.31	2240.8	2282.39	3357.51	1870.79	1841.34	1346.99	2625.25	1315.15	2547.64	3527.92	1107.95	2233.58	2084.13	1718.26	2463.95	1668.7	3844.84	1452.63	1710.83
	5 days, 23:55:15	3450.94	3628.87	4056.44	1988.3	3562.87	2464.56	1420.77	2363.46	4192.44	2310.38	3469.21	2123.81	2269.44	2233.2	6101.9	3481.95	2805.31	1878.03	2643.9	3849.56	5036.96	3742.54	1914.26	3102.19	1744.65	3488.62	1548.15	2308.46	3682.84	2633.17	3444.11	2810.36	1640.26	3182.21	1871.88	3330.39	1225.87	1779.36	3801.74	1125.46	3226.98	2031.52	1878.88	2559.85	1641.93	5136.5	1725.18	2675.62
	7 days, 0:05:25	4283.61	3118.2	2909.56	2756.93	2811.79	1990.74	1905.14	1750.47	3114.53	2471.83	3359.49	2206.85	2095.38	1654.44	4226.39	2354.63	2134.26	1626.32	1691	3532.53	3785.94	3743.27	2006.72	4778.13	1649.1	3342.23	1513.59	1839.72	2584.12	1457.25	2472.96	3083.97	2608.3	2230.56	3230.53	2660.36	2252.75	1618.54	4225.76	1438.52	2894.94	1555.89	2283.47	2203.62	1513.38	4627.29	1339.99	1449.28
	8 days, 0:06:29	3945.45	4161.62	4119.52	2874.62	4440.04	2346.37	2198.24	2265.97	3225.06	4244.34	3239.93	2824.86	2090.76	3619.69	4921.95	2792.08	3672.22	2243.19	3466.89	3407.41	3533.61	3978.61	2280.19	3513.92	2232.75	4995.66	1946.05	1382.29	3235.29	2855.68	2703	3906.13	1912.23	2131.02	2926.83	3417.37	2891.3	2129.63	3908.05	2781.1	3260.5	2108.37	4235.99	4026.5	2988.97	4463.92	2423.04	1982.16
	8 days, 23:20:04	4611.49	3206.32	2172.68	2532.22	2832.29	2140.35	1216.97	1531.95	2577.47	2812.5	3672.64	2575.17	2003.17	1967.1	4090.5	3015.32	2104.89	2493.34	1360.87	3331.01	3763.26	4143.08	1853.45	3981.79	2268.45	4040.49	2471.81	2029.66	3754.44	3221.69	3226.56	2431.69	2821.28	2750.36	2990.96	2613.8	1990.74	2405.62	3685.41	5125	2823.71	2019.4	3337.31	2443.31	2348.07	5460.78	2182.48	1864.56
	10 days, 0:03:16	2613.56	1243.39	2498.57	1530.03	1965.48	931.148	767.274	1185.66	1988.4	2345.79	2201.07	2057.93	1560.16	1331.32	2513.55	1717.58	1306.91	1744.45	1524.42	2163.7	2105.26	3055.05	1226.05	3755.02	807.122	2597.66	1184.1	1488.45	2009.11	2826.09	1728.14	2583.62	2667.29	1628.47	1650.2	3364.78	793.306	2230.61	2474.72	3275.62	2075.61	1312.8	1418.41	1497.59	1474.44	3547.01	2291.8	1863.47
	10 days, 23:48:30	3880.04	3965.01	3630.89	4163.79	4076.37	2506.67	2275.49	2074.9	3572.58	2959.87	4905.17	2964.86	2883.68	2415.04	4790.17	3490.65	2722.18	3914.69	2517.19	3343.35	4620.91	5126.38	1934.63	5309.81	2130.58	3551.49	2977.17	2429.72	4534.21	3172	2675.16	3642.86	2636.22	3338.58	2401.22	2619.41	2321.08	2768.59	5033.78	4262.57	3502.44	2555.56	3646.89	3468.7	2252.92	5360.82	3485.54	1741.29
	00:00:00	?????	?????	?????	?????	?????	?????	?????	?????	?????	?????	?????	?????	?????	?????	?????	?????	?????	?????	?????	?????	?????	?????	?????	?????	?????	?????	?????	?????	?????	?????	?????	?????	?????	?????	?????	?????	?????	?????	?????	?????	?????	?????	?????	?????	?????	?????	?????	?????
	00:00:00	?????	?????	?????	?????	?????	?????	?????	?????	?????	?????	?????	?????	?????	?????	?????	?????	?????	?????	?????	?????	?????	?????	?????	?????	?????	?????	?????	?????	?????	?????	?????	?????	?????	?????	?????	?????	?????	?????	?????	?????	?????	?????	?????	?????	?????	?????	?????	?????
	00:00:00	?????	?????	?????	?????	?????	?????	?????	?????	?????	?????	?????	?????	?????	?????	?????	?????	?????	?????	?????	?????	?????	?????	?????	?????	?????	?????	?????	?????	?????	?????	?????	?????	?????	?????	?????	?????	?????	?????	?????	?????	?????	?????	?????	?????	?????	?????	?????	?????
	00:00:00	?????	?????	?????	?????	?????	?????	?????	?????	?????	?????	?????	?????	?????	?????	?????	?????	?????	?????	?????	?????	?????	?????	?????	?????	?????	?????	?????	?????	?????	?????	?????	?????	?????	?????	?????	?????	?????	?????	?????	?????	?????	?????	?????	?????	?????	?????	?????	?????
	00:00:00	?????	?????	?????	?????	?????	?????	?????	?????	?????	?????	?????	?????	?????	?????	?????	?????	?????	?????	?????	?????	?????	?????	?????	?????	?????	?????	?????	?????	?????	?????	?????	?????	?????	?????	?????	?????	?????	?????	?????	?????	?????	?????	?????	?????	?????	?????	?????	?????
	00:00:00	?????	?????	?????	?????	?????	?????	?????	?????	?????	?????	?????	?????	?????	?????	?????	?????	?????	?????	?????	?????	?????	?????	?????	?????	?????	?????	?????	?????	?????	?????	?????	?????	?????	?????	?????	?????	?????	?????	?????	?????	?????	?????	?????	?????	?????	?????	?????	?????
	00:00:00	?????	?????	?????	?????	?????	?????	?????	?????	?????	?????	?????	?????	?????	?????	?????	?????	?????	?????	?????	?????	?????	?????	?????	?????	?????	?????	?????	?????	?????	?????	?????	?????	?????	?????	?????	?????	?????	?????	?????	?????	?????	?????	?????	?????	?????	?????	?????	?????
	00:00:00	?????	?????	?????	?????	?????	?????	?????	?????	?????	?????	?????	?????	?????	?????	?????	?????	?????	?????	?????	?????	?????	?????	?????	?????	?????	?????	?????	?????	?????	?????	?????	?????	?????	?????	?????	?????	?????	?????	?????	?????	?????	?????	?????	?????	?????	?????	?????	?????
	00:00:00	?????	?????	?????	?????	?????	?????	?????	?????	?????	?????	?????	?????	?????	?????	?????	?????	?????	?????	?????	?????	?????	?????	?????	?????	?????	?????	?????	?????	?????	?????	?????	?????	?????	?????	?????	?????	?????	?????	?????	?????	?????	?????	?????	?????	?????	?????	?????	?????
	00:00:00	?????	?????	?????	?????	?????	?????	?????	?????	?????	?????	?????	?????	?????	?????	?????	?????	?????	?????	?????	?????	?????	?????	?????	?????	?????	?????	?????	?????	?????	?????	?????	?????	?????	?????	?????	?????	?????	?????	?????	?????	?????	?????	?????	?????	?????	?????	?????	?????
	00:00:00	?????	?????	?????	?????	?????	?????	?????	?????	?????	?????	?????	?????	?????	?????	?????	?????	?????	?????	?????	?????	?????	?????	?????	?????	?????	?????	?????	?????	?????	?????	?????	?????	?????	?????	?????	?????	?????	?????	?????	?????	?????	?????	?????	?????	?????	?????	?????	?????
Ratio cfp od
	Time	A1	A2	A3	A4	A5	A6	A7	A8	A9	A10	A11	A12	B1	B2	B3	B4	B5	B6	B7	B8	B9	B10	B11	B12	C1	C2	C3	C4	C5	C6	C7	C8	C9	C10	C11	C12	D1	D2	D3	D4	D5	D6	D7	D8	D9	D10	D11	D12
	00:00:03	44126.4	44198	37857.7	39772.3	40414.4	37934.5	33750.9	37738.9	39341.6	42760.5	40277.8	44165.4	47724.8	43982.8	46475.6	41183.7	39205	38399	33968	38778.7	34210.9	36001.6	42707.6	47610	48160.4	53805.1	40079.2	35417.3	35443.9	36000	33506.5	29665.2	29961.7	31434.7	34326.2	51277.2	42520.7	44916	37064.9	30573.4	31663.1	29060.8	26537.1	26176	26024.1	30259.3	39770.9	41529.4
	23:45:21	59119.2	69961.8	61551	65880.4	59954.4	65387.7	56690.3	59928	48868.5	46589.4	43098	38439.8	61138	73380.4	60023.8	56256.1	48208.1	46567.3	52330.5	42614.7	48997.5	44028.4	34100.8	36543.9	58828.7	60872.1	52474.5	51844	47612.5	43280.1	49962.6	38374.1	37018.7	31873.8	35629.5	38079.7	60656.4	65303.2	62090.1	35583.8	33469.4	32919.9	31286.6	33021	28336.5	72165.4	38564.5	45790.5
	1 day, 23:39:48	152792	63689.8	51378.9	47622.9	47717.3	55992.5	47841	53998.8	45082.5	48148.4	35853.8	42016.3	64104.5	71205.7	210515	77851.2	61463.8	65280.4	41907.1	55949.7	215062	195798	38174.7	69535	57641.5	161389	47694	42562.5	39221.5	60428.4	55870.7	53078.8	36305.7	45407.2	43611.1	60373.6	50794.8	56808.4	234116	41594.9	38550.1	39326.9	37509.3	57576.1	42901	290697	46269.7	55295.8
	2 days, 23:59:37	287951	127023	184170	69478.2	81786.1	78177.5	67074.5	66447.8	217670	89624.3	82589.9	76461.7	60550.7	69429.1	298014	173234	79578.7	78899.4	74566.8	87500	291175	298219	88105.5	271110	55909.6	248217	62761.2	63369.3	106691	73310.1	157191	83590	72485.9	79966.1	82734.6	146528	69369.3	73878.4	284814	69381.5	150142	71777.6	74259.8	184211	80349.3	346061	80647.6	96055.4
	3 days, 23:49:53	300848	196951	213902	60567.6	99253.5	65249.1	59556.6	61953.3	203780	120755	70767.1	80359.3	57448.8	56414.1	309356	142285	58789.8	51223.5	63677.4	117717	268436	287326	65772.8	248079	66019.8	278259	44191.7	47832.5	150599	58300.4	143205	127207	55767.8	77820.3	97405.2	171412	50884.2	48735.6	263930	50546.3	126445	53241	59598.6	132672	63183.9	341840	66279.1	76437.2
	4 days, 23:53:08	325282	224747	219686	66146.7	149193	66982	59119	64995.6	195148	139722	91600.8	61369	54468.1	61029.3	326252	174525	55658.7	55142.9	75081.5	178983	280839	296513	46078.7	236939	61882.8	283029	54443.7	58824.9	186279	63762.5	146395	166454	56002.7	108767	114929	165979	46012.1	54820	305702	52159.1	143599	50452.5	61901.5	147818	46204.2	350904	53543.9	58304.3
	5 days, 23:55:14	335127	279979	240573	139465	190160	88157	79125.7	72224.4	261546	197306	195663	81514.3	73056.1	82075.1	358637	227314	106416	75614.7	89356.1	190327	347328	317187	67477.6	286159	64710.5	294258	62547.3	68069.7	193440	70271.4	178449	158926	65377.4	188579	174393	210486	67229.7	69172.6	315163	73487.1	168423	66050.8	115994	191381	67013	426148	71253.8	76838.8
	7 days, 0:05:25	275334	209705	204505	148785	180809	68412.7	58665.6	59227.2	204483	202983	315414	111661	55440.8	75016.7	325425	185556	113958	51361.6	93631.4	176914	316837	329370	54517.2	299509	52816.3	299253	46017.6	44836.2	168122	48892.2	168839	178649	64783.4	160109	183092	185449	47001.6	54634	312142	49884	161027	51352	172598	168948	53035.1	370752	45951.5	51529
	8 days, 0:06:29	345255	287586	323865	242890	241506	60558.7	100248	68512.7	241392	231810	333757	190718	79667.7	89720.1	412635	248129	218282	86886.8	186664	267737	341324	350203	77777.8	322302	70277.4	376386	68343	55068.4	285147	141658	225473	266754	102268	190047	234078	238590	83673.9	75432.1	367167	152715	197319	70335	313939	224373	84654	430351	94796.4	91159.6
	8 days, 23:20:04	364324	252463	268854	240857	221962	62512.3	122026	65328.9	193847	196822	327191	231388	85233.6	68025.8	381855	212779	180839	74977.8	160975	323471	321633	338947	66732.8	344859	84646.8	349437	66253.3	69165.9	299894	236555	207211	292821	92570.3	206720	217617	228120	75407.4	72871.9	325205	399994	190390	65105.8	345095	201068	79208.1	455824	125679	75352.5
	10 days, 0:03:16	273608	117480	181702	155129	147472	29360.7	74230.6	44393.4	155549	187364	235050	160808	58906.2	57443.3	247168	133028	156130	97169.1	122657	224690	268576	252257	57333.3	271697	28276	199564	58958.2	49811.9	209579	232918	136714	192543	139099	130488	115166	223553	30576.4	58339.1	196333	257708	132513	58849.3	140614	152105	66153.3	302530	206482	72038.7
	10 days, 23:48:30	373365	291672	289208	290017	278937	70524.4	143409	92135.6	225331	230443	383095	246903	82924.1	67512.7	394309	270427	202202	207090	208425	267002	374765	367788	73975.3	453554	74192.4	378499	151918	98343.4	322358	288719	207205	250686	231138	245425	272736	266903	85599.6	71884.3	416182	347272	261639	63564.1	257829	243773	101477	456725	272466	65829.2
	00:00:00	?????	?????	?????	?????	?????	?????	?????	?????	?????	?????	?????	?????	?????	?????	?????	?????	?????	?????	?????	?????	?????	?????	?????	?????	?????	?????	?????	?????	?????	?????	?????	?????	?????	?????	?????	?????	?????	?????	?????	?????	?????	?????	?????	?????	?????	?????	?????	?????
	00:00:00	?????	?????	?????	?????	?????	?????	?????	?????	?????	?????	?????	?????	?????	?????	?????	?????	?????	?????	?????	?????	?????	?????	?????	?????	?????	?????	?????	?????	?????	?????	?????	?????	?????	?????	?????	?????	?????	?????	?????	?????	?????	?????	?????	?????	?????	?????	?????	?????
	00:00:00	?????	?????	?????	?????	?????	?????	?????	?????	?????	?????	?????	?????	?????	?????	?????	?????	?????	?????	?????	?????	?????	?????	?????	?????	?????	?????	?????	?????	?????	?????	?????	?????	?????	?????	?????	?????	?????	?????	?????	?????	?????	?????	?????	?????	?????	?????	?????	?????
	00:00:00	?????	?????	?????	?????	?????	?????	?????	?????	?????	?????	?????	?????	?????	?????	?????	?????	?????	?????	?????	?????	?????	?????	?????	?????	?????	?????	?????	?????	?????	?????	?????	?????	?????	?????	?????	?????	?????	?????	?????	?????	?????	?????	?????	?????	?????	?????	?????	?????
	00:00:00	?????	?????	?????	?????	?????	?????	?????	?????	?????	?????	?????	?????	?????	?????	?????	?????	?????	?????	?????	?????	?????	?????	?????	?????	?????	?????	?????	?????	?????	?????	?????	?????	?????	?????	?????	?????	?????	?????	?????	?????	?????	?????	?????	?????	?????	?????	?????	?????
	00:00:00	?????	?????	?????	?????	?????	?????	?????	?????	?????	?????	?????	?????	?????	?????	?????	?????	?????	?????	?????	?????	?????	?????	?????	?????	?????	?????	?????	?????	?????	?????	?????	?????	?????	?????	?????	?????	?????	?????	?????	?????	?????	?????	?????	?????	?????	?????	?????	?????
	00:00:00	?????	?????	?????	?????	?????	?????	?????	?????	?????	?????	?????	?????	?????	?????	?????	?????	?????	?????	?????	?????	?????	?????	?????	?????	?????	?????	?????	?????	?????	?????	?????	?????	?????	?????	?????	?????	?????	?????	?????	?????	?????	?????	?????	?????	?????	?????	?????	?????
	00:00:00	?????	?????	?????	?????	?????	?????	?????	?????	?????	?????	?????	?????	?????	?????	?????	?????	?????	?????	?????	?????	?????	?????	?????	?????	?????	?????	?????	?????	?????	?????	?????	?????	?????	?????	?????	?????	?????	?????	?????	?????	?????	?????	?????	?????	?????	?????	?????	?????
	00:00:00	?????	?????	?????	?????	?????	?????	?????	?????	?????	?????	?????	?????	?????	?????	?????	?????	?????	?????	?????	?????	?????	?????	?????	?????	?????	?????	?????	?????	?????	?????	?????	?????	?????	?????	?????	?????	?????	?????	?????	?????	?????	?????	?????	?????	?????	?????	?????	?????
	00:00:00	?????	?????	?????	?????	?????	?????	?????	?????	?????	?????	?????	?????	?????	?????	?????	?????	?????	?????	?????	?????	?????	?????	?????	?????	?????	?????	?????	?????	?????	?????	?????	?????	?????	?????	?????	?????	?????	?????	?????	?????	?????	?????	?????	?????	?????	?????	?????	?????
	00:00:00	?????	?????	?????	?????	?????	?????	?????	?????	?????	?????	?????	?????	?????	?????	?????	?????	?????	?????	?????	?????	?????	?????	?????	?????	?????	?????	?????	?????	?????	?????	?????	?????	?????	?????	?????	?????	?????	?????	?????	?????	?????	?????	?????	?????	?????	?????	?????	?????
Ratio yfp cfp
	Time	A1	A2	A3	A4	A5	A6	A7	A8	A9	A10	A11	A12	B1	B2	B3	B4	B5	B6	B7	B8	B9	B10	B11	B12	C1	C2	C3	C4	C5	C6	C7	C8	C9	C10	C11	C12	D1	D2	D3	D4	D5	D6	D7	D8	D9	D10	D11	D12
	00:00:15	3.531	3.602	4.395	3.081	1.905	3.898	2.225	3.462	4.421	3.185	4.897	2.325	3.02	2.659	3.108	3.73	3.551	2.834	3.178	2.85	3.673	3.629	5.39	3.771	2.907	3.041	2.199	3.184	3.677	3.622	2.415	2.735	3.192	3.066	3.549	4.485	2.526	2.141	2.62	3.389	1.959	3.131	2.903	3.95	3.254	3.619	4.586	4.063
	23:45:33	8.575	5.248	6.149	6.189	4.593	5.816	4.267	3.667	6.336	5.471	5.073	4.918	5.871	5.353	4.554	4.486	3.63	3.658	6.061	6.691	3.941	4.895	4.252	3.784	6.348	5.103	5.075	3.5	4.591	3.553	3.957	4.585	3.036	5.396	4.895	6.192	6.296	5.735	3.292	5.067	4.47	5.807	3.657	3.815	4.628	2.676	7.532	5.046
	1 day, 23:40:01	2.618	4.582	4.921	4.676	3.784	3.423	3.492	5.663	5.729	2.692	3.733	4.416	3.473	3.855	2.605	4.207	4.738	5.517	6.025	4.829	2.512	1.793	4.78	2.036	3.242	2.564	4.229	3.551	4.146	5.088	2.99	4.777	4.783	4.555	3.589	5.054	5.184	3.834	2.16	4.787	5.335	3.503	4.831	2.727	3.865	1.668	6.43	3.453
	2 days, 23:59:49	1.646	2.259	2.764	4.508	3.659	5.551	6.679	3.183	1.614	4.063	4.528	3.368	3.823	4.067	1.967	1.945	5.275	4.775	3.746	4.196	1.755	2.181	3.852	2.078	3.062	1.648	4.926	3.322	2.636	4.069	2.968	5.635	5.731	7.247	3.602	1.973	4.989	4.294	2.056	3.918	2.438	3.651	2.896	2.308	4.357	1.603	3.094	2.583
	3 days, 23:50:05	1.848	2.337	2.552	7.375	3.111	4.338	4.342	4.414	1.885	3.815	3.889	4.377	7.159	5.303	2.168	2.743	4.959	8.152	6.342	2.349	2.067	2.162	6.589	2.353	6.723	2.033	4.873	4.665	3.287	5.694	2.948	2.622	5.632	3.721	3.751	2.374	4.265	6.559	2.464	8.576	3.364	4.365	3.787	2.516	4.831	1.672	5.708	4.158
	4 days, 23:53:20	1.925	1.937	2.083	5.778	2.188	6.895	3.642	4.628	2.319	3.193	2.767	5.858	3.638	6.819	1.633	2.41	4.047	5.689	5.449	2.312	2.081	1.957	5.283	2.772	6.47	2.196	5.535	5.01	2.827	5.936	2.452	3.131	5.039	3.149	2.325	2.708	5.887	5.585	2.655	4.675	3.105	4.862	5.089	2.244	5.034	1.846	5.982	3.477
	5 days, 23:55:27	2.379	1.903	1.892	3.067	3.286	5.416	3.345	5.242	2.251	2.476	2.344	3.22	6.378	5.524	2.648	2.618	4.46	5.596	3.972	3.207	2.037	1.966	4.701	2.295	5.934	2.205	4.707	4.914	2.998	4.532	3.163	3.315	6.681	3.58	3.541	2.217	5.192	5.844	2.48	3.521	2.639	6.362	3.156	2.283	6.165	2.112	5.435	4.629
	7 days, 0:05:37	2.262	2.152	2.423	2.953	2.6	6.474	3.72	8.192	2.237	2.774	2.004	2.587	4.748	4.566	1.991	2.399	3.396	6.242	2.64	3.007	1.873	2.038	3.828	2.18	7.611	1.931	5.464	7.638	2.771	7.694	2.254	2.81	7.038	2.692	2.456	2.472	4.611	5.38	2.127	8.455	2.965	4.256	2.735	2.76	5.149	1.854	6.089	5.161
	8 days, 0:06:41	2.527	2.255	2.144	1.932	2.76	5.483	4.182	4.396	1.81	2.035	2.05	2.111	4.869	10.497	1.963	2.087	2.596	5.346	1.875	2.009	1.977	2.248	6.214	2.13	6.538	1.927	4.505	5.487	2.048	3.402	3.233	2.058	4.785	2.418	2.37	1.93	4.353	4.376	1.795	3.244	2.891	5.505	1.988	1.944	6.248	2.057	3.597	4.656
	8 days, 23:20:16	2.043	2.245	2.096	1.938	2.357	6.653	3.227	4.845	2.583	1.785	2.095	1.95	4.028	5.698	2.085	2.281	2.151	4.515	2.141	1.712	2.159	2.049	5.343	1.858	3.498	1.637	5.577	4.519	1.888	2.426	2.388	1.877	4.995	2.117	2.802	2.182	8.327	4.821	1.959	2.17	2.984	5.268	1.89	2.693	7.543	1.939	2.776	5.852
	10 days, 0:03:28	1.962	1.891	2.448	2.155	2.55	4.948	3.652	4.189	2.138	3.415	1.541	2.486	2.894	5.285	1.494	2.486	2.666	2.176	2.2	2.098	1.907	2.183	4.498	1.86	3.755	1.759	3.144	3.108	1.995	1.866	2.319	2.13	3.378	1.881	2.725	1.73	3.3	5.296	1.876	2.111	1.989	3.475	2.096	3.134	5.502	1.809	1.808	2.511
	10 days, 23:48:42	1.991	2.665	2.578	2.447	2.143	4.408	2.245	4.643	2.263	1.998	1.717	2.347	4.563	6.072	2.062	2.334	2.228	2.553	2.357	2.16	1.837	1.443	3.706	1.822	5.97	1.759	3.323	5.244	2.509	2.269	2.631	2.074	1.863	1.959	2.519	1.639	4.275	5.882	1.946	1.611	2.579	5.186	2.2	2.328	4.935	1.752	1.77	4.537
	00:00:00	?????	?????	?????	?????	?????	?????	?????	?????	?????	?????	?????	?????	?????	?????	?????	?????	?????	?????	?????	?????	?????	?????	?????	?????	?????	?????	?????	?????	?????	?????	?????	?????	?????	?????	?????	?????	?????	?????	?????	?????	?????	?????	?????	?????	?????	?????	?????	?????
	00:00:00	?????	?????	?????	?????	?????	?????	?????	?????	?????	?????	?????	?????	?????	?????	?????	?????	?????	?????	?????	?????	?????	?????	?????	?????	?????	?????	?????	?????	?????	?????	?????	?????	?????	?????	?????	?????	?????	?????	?????	?????	?????	?????	?????	?????	?????	?????	?????	?????
	00:00:00	?????	?????	?????	?????	?????	?????	?????	?????	?????	?????	?????	?????	?????	?????	?????	?????	?????	?????	?????	?????	?????	?????	?????	?????	?????	?????	?????	?????	?????	?????	?????	?????	?????	?????	?????	?????	?????	?????	?????	?????	?????	?????	?????	?????	?????	?????	?????	?????
	00:00:00	?????	?????	?????	?????	?????	?????	?????	?????	?????	?????	?????	?????	?????	?????	?????	?????	?????	?????	?????	?????	?????	?????	?????	?????	?????	?????	?????	?????	?????	?????	?????	?????	?????	?????	?????	?????	?????	?????	?????	?????	?????	?????	?????	?????	?????	?????	?????	?????
	00:00:00	?????	?????	?????	?????	?????	?????	?????	?????	?????	?????	?????	?????	?????	?????	?????	?????	?????	?????	?????	?????	?????	?????	?????	?????	?????	?????	?????	?????	?????	?????	?????	?????	?????	?????	?????	?????	?????	?????	?????	?????	?????	?????	?????	?????	?????	?????	?????	?????
	00:00:00	?????	?????	?????	?????	?????	?????	?????	?????	?????	?????	?????	?????	?????	?????	?????	?????	?????	?????	?????	?????	?????	?????	?????	?????	?????	?????	?????	?????	?????	?????	?????	?????	?????	?????	?????	?????	?????	?????	?????	?????	?????	?????	?????	?????	?????	?????	?????	?????
	00:00:00	?????	?????	?????	?????	?????	?????	?????	?????	?????	?????	?????	?????	?????	?????	?????	?????	?????	?????	?????	?????	?????	?????	?????	?????	?????	?????	?????	?????	?????	?????	?????	?????	?????	?????	?????	?????	?????	?????	?????	?????	?????	?????	?????	?????	?????	?????	?????	?????
	00:00:00	?????	?????	?????	?????	?????	?????	?????	?????	?????	?????	?????	?????	?????	?????	?????	?????	?????	?????	?????	?????	?????	?????	?????	?????	?????	?????	?????	?????	?????	?????	?????	?????	?????	?????	?????	?????	?????	?????	?????	?????	?????	?????	?????	?????	?????	?????	?????	?????
	00:00:00	?????	?????	?????	?????	?????	?????	?????	?????	?????	?????	?????	?????	?????	?????	?????	?????	?????	?????	?????	?????	?????	?????	?????	?????	?????	?????	?????	?????	?????	?????	?????	?????	?????	?????	?????	?????	?????	?????	?????	?????	?????	?????	?????	?????	?????	?????	?????	?????
	00:00:00	?????	?????	?????	?????	?????	?????	?????	?????	?????	?????	?????	?????	?????	?????	?????	?????	?????	?????	?????	?????	?????	?????	?????	?????	?????	?????	?????	?????	?????	?????	?????	?????	?????	?????	?????	?????	?????	?????	?????	?????	?????	?????	?????	?????	?????	?????	?????	?????
	00:00:00	?????	?????	?????	?????	?????	?????	?????	?????	?????	?????	?????	?????	?????	?????	?????	?????	?????	?????	?????	?????	?????	?????	?????	?????	?????	?????	?????	?????	?????	?????	?????	?????	?????	?????	?????	?????	?????	?????	?????	?????	?????	?????	?????	?????	?????	?????	?????	?????
Ratio cfp2 od
	Time	A1	A2	A3	A4	A5	A6	A7	A8	A9	A10	A11	A12	B1	B2	B3	B4	B5	B6	B7	B8	B9	B10	B11	B12	C1	C2	C3	C4	C5	C6	C7	C8	C9	C10	C11	C12	D1	D2	D3	D4	D5	D6	D7	D8	D9	D10	D11	D12
	00:00:15	1123.24	1041.94	774.336	1019.04	1235.34	828.424	839.748	782.54	819.521	1145.68	811.287	1255.54	1143.41	1083.22	975.61	1079.94	861.244	1142.55	821.441	1082.47	783.513	904.685	775.038	1250.66	1252.2	1295.06	858.41	967.947	814.838	895.57	708.101	706.388	845.361	925.395	766.844	982.931	950.629	1144.94	982.194	812.548	839.493	657.448	671.378	558.659	710.843	860.641	951.195	895.141
	23:45:33	1298.93	1574.43	1208.16	1339.51	1437.26	1355.36	1491.48	1793.95	896.01	1348.38	974.275	883.341	1792.55	1819.61	1529.32	1489.21	1268.46	1132.3	1058.75	795.091	1129.77	850.84	1044.18	1032.69	1084.22	1566.47	1157.2	1639.13	974.359	1283.08	981.857	960.145	1051.96	722.509	823.36	965.75	1563.71	1417.59	1771.77	813.373	994.898	879.303	922.407	727.56	735.464	1624.03	751.06	1033.78
	1 day, 23:40:00	3744.16	1352.18	1140.46	1004.27	1499.39	1633.85	1062.1	1031.75	798.969	1104.4	1042.45	1073.57	1773.78	1648.5	4907.69	2056.86	1487.67	1401.87	767.726	1085.37	5369.96	4978.23	772.414	1612.71	1590.3	4201.86	1308.2	1004.41	854.093	1200.84	1476.58	1253.88	925.764	1067.27	1055.56	1141.3	936.537	1458.47	5710.15	1075.77	822.042	852.928	822.491	1457.31	930.116	7245.09	980.263	1608.95
	2 days, 23:59:49	7159.72	2854.86	4057.66	1650.98	2377.99	1478.82	1241.13	2028.62	5020.38	1820.81	2304.44	1524.06	1453.74	1526.44	6676.36	4063.02	1769.66	1603.42	2093.86	1997.99	6984.13	6990.48	2109.8	6693.48	1385.84	5922.69	1459.37	1468.88	2183.62	1729.62	3568.69	2195.63	1500.94	1828.44	2129.16	3953.99	1526.97	1794.62	7296.44	1811.85	4080.72	1654.99	1825.61	4421.05	2265.47	8520.65	2238.09	2652.83
	3 days, 23:50:05	7631.34	4830.22	5121.95	1268.78	2478.87	1856.65	1805.23	2048.4	4812.03	2890.57	1949.46	1878.85	1237.2	1123.74	7096.15	3352.75	1326.61	1127.82	1318.3	3000.68	6889.63	7139.38	1349.27	5948.35	1316.59	6537.72	1179.92	1492.23	3543.81	1138.34	3558.8	3430.85	1116.83	1573.82	2223.07	3852.94	1431.58	1149.42	6652.17	864.454	3067.03	1364.27	1718.31	3569	1352.58	8084.03	1592.13	1823.26
	4 days, 23:53:20	8631.07	5367.53	5571.32	1488.14	3696.55	1485.54	1661.52	1801.57	4606.45	3570.32	2270.41	1607.14	1624.11	1540.56	7780.49	4486.98	1512.01	1233.45	2137.68	3940.17	6577.69	7488.91	920.051	5635.63	1652.4	7564.22	1197.18	1463.23	4350.8	1045.15	3529.82	4162.44	1218.04	2530.4	2576.04	3820.97	1072.73	1242.06	7191.2	1505.68	3948.91	1434.03	1705.62	3260.19	1075.8	8388.75	1150.88	1506.43
	5 days, 23:55:26	7728.78	6814.43	6225.75	3467	3972.06	2017.45	2120.22	1559.09	6400.34	4673.06	4934.95	2333.33	1410.49	2094.86	8424.17	5530.79	2230.09	1655.37	2478.05	4451.33	8342.13	7459.51	2033.9	6989.05	1205.39	7226.44	1350.13	1741.29	4800.69	1266.33	4320.24	4059.41	1519.11	4071.49	4276.21	5256.18	1505.79	1592.53	7211.33	2214.02	4193.25	1304.73	2732.92	4788.21	1521.34	10121.3	2006.02	2004.13
	7 days, 0:05:37	6899.34	5217.73	4982.94	3311.58	4119.43	1759.26	1752.41	1452.51	4853.35	4455.3	7382.31	3029.86	1488.44	1861.24	8245.14	4716.44	2716.91	1157.34	2481.75	4266.26	7803.51	8001.54	1460.96	7052.3	986.446	7371.58	1410.73	885.017	4266.49	1092.94	4059.12	4297.71	1191.34	3990.45	4749.42	4463.2	1695.45	1430.49	7720.69	866.203	4023.35	1178.25	4047.24	4105.83	1011.71	9205.34	1275.84	1079.71
	8 days, 0:06:41	8100	6858.59	8278.88	5940.37	5748.27	1662.01	2454.04	1898.51	6341.84	5882.35	7670.75	4576.27	1920.58	1476.83	9779.61	5950.49	5381.24	2274.63	5036.8	6493.83	8594.7	8032.09	1623.19	7674.94	1332.88	9226.76	1888.25	1612.67	7156.86	3285.57	5539.49	6833.73	2727.27	4664.56	5531.71	6526.61	1847.83	1967.59	9310.34	3439.79	4563.02	1911.33	8157.9	5606.52	1574.72	10257.7	2562.07	1843.41
	8 days, 23:20:16	9442.57	5622.68	6284.5	5845.34	5247.04	1494.74	3098.48	2189.85	4353.74	4847.56	7947.88	6229.76	2280.28	1609.44	9221.72	5626.74	4216.78	2138.42	3601.9	7597.77	7861.22	8459.12	1534.48	8518.21	2189.95	8723.59	1231.57	1751.62	7260.47	6004.78	5070.31	7800.55	2108.43	5007.26	5480.69	5572.69	1472.22	1983.72	7849.54	9850	4274.57	1578.48	8337.31	4886.61	1390.42	11068.6	2897.81	1502.78
	10 days, 0:03:28	6056.62	2573.02	4366.76	3598.66	3312.92	763.934	1691.39	1121.32	4040.08	4439.25	6207.16	3620.43	1744.39	1354.01	5914.63	2919.21	3482.29	2341.24	3059.58	5316.73	6738.91	6000	1647.51	7329.32	836.795	4557.29	1364.02	1295	4951.62	5830.04	3340.16	4780.85	3243.49	3149.68	2452.06	5167.72	867.679	1578.59	5061.2	6378.12	3432.17	1774.72	3375.75	3443.75	1435.12	7145.3	4890.07	2057.2
	10 days, 23:48:42	9165.89	6987.37	7542.63	6974.14	7285.86	1742.22	3691.02	2267.21	5572.58	5376.25	9500	5885.8	2366.72	1308.75	10122.8	6402.49	5204.16	4900.47	5123.8	6498.87	9162.01	9889.42	1863.96	11325.3	2036.08	9143.41	3844.75	2058.23	7749.38	6746.09	5374.2	5892.86	5512.82	6133.86	6056.23	6640.99	2495.16	1611.57	9729.73	8567.77	6136.59	1512.82	6208.39	6209.81	2136.03	11562.3	6780.82	1774.46
	00:00:00	?????	?????	?????	?????	?????	?????	?????	?????	?????	?????	?????	?????	?????	?????	?????	?????	?????	?????	?????	?????	?????	?????	?????	?????	?????	?????	?????	?????	?????	?????	?????	?????	?????	?????	?????	?????	?????	?????	?????	?????	?????	?????	?????	?????	?????	?????	?????	?????
	00:00:00	?????	?????	?????	?????	?????	?????	?????	?????	?????	?????	?????	?????	?????	?????	?????	?????	?????	?????	?????	?????	?????	?????	?????	?????	?????	?????	?????	?????	?????	?????	?????	?????	?????	?????	?????	?????	?????	?????	?????	?????	?????	?????	?????	?????	?????	?????	?????	?????
	00:00:00	?????	?????	?????	?????	?????	?????	?????	?????	?????	?????	?????	?????	?????	?????	?????	?????	?????	?????	?????	?????	?????	?????	?????	?????	?????	?????	?????	?????	?????	?????	?????	?????	?????	?????	?????	?????	?????	?????	?????	?????	?????	?????	?????	?????	?????	?????	?????	?????
	00:00:00	?????	?????	?????	?????	?????	?????	?????	?????	?????	?????	?????	?????	?????	?????	?????	?????	?????	?????	?????	?????	?????	?????	?????	?????	?????	?????	?????	?????	?????	?????	?????	?????	?????	?????	?????	?????	?????	?????	?????	?????	?????	?????	?????	?????	?????	?????	?????	?????
	00:00:00	?????	?????	?????	?????	?????	?????	?????	?????	?????	?????	?????	?????	?????	?????	?????	?????	?????	?????	?????	?????	?????	?????	?????	?????	?????	?????	?????	?????	?????	?????	?????	?????	?????	?????	?????	?????	?????	?????	?????	?????	?????	?????	?????	?????	?????	?????	?????	?????
	00:00:00	?????	?????	?????	?????	?????	?????	?????	?????	?????	?????	?????	?????	?????	?????	?????	?????	?????	?????	?????	?????	?????	?????	?????	?????	?????	?????	?????	?????	?????	?????	?????	?????	?????	?????	?????	?????	?????	?????	?????	?????	?????	?????	?????	?????	?????	?????	?????	?????
	00:00:00	?????	?????	?????	?????	?????	?????	?????	?????	?????	?????	?????	?????	?????	?????	?????	?????	?????	?????	?????	?????	?????	?????	?????	?????	?????	?????	?????	?????	?????	?????	?????	?????	?????	?????	?????	?????	?????	?????	?????	?????	?????	?????	?????	?????	?????	?????	?????	?????
	00:00:00	?????	?????	?????	?????	?????	?????	?????	?????	?????	?????	?????	?????	?????	?????	?????	?????	?????	?????	?????	?????	?????	?????	?????	?????	?????	?????	?????	?????	?????	?????	?????	?????	?????	?????	?????	?????	?????	?????	?????	?????	?????	?????	?????	?????	?????	?????	?????	?????
	00:00:00	?????	?????	?????	?????	?????	?????	?????	?????	?????	?????	?????	?????	?????	?????	?????	?????	?????	?????	?????	?????	?????	?????	?????	?????	?????	?????	?????	?????	?????	?????	?????	?????	?????	?????	?????	?????	?????	?????	?????	?????	?????	?????	?????	?????	?????	?????	?????	?????
	00:00:00	?????	?????	?????	?????	?????	?????	?????	?????	?????	?????	?????	?????	?????	?????	?????	?????	?????	?????	?????	?????	?????	?????	?????	?????	?????	?????	?????	?????	?????	?????	?????	?????	?????	?????	?????	?????	?????	?????	?????	?????	?????	?????	?????	?????	?????	?????	?????	?????
	00:00:00	?????	?????	?????	?????	?????	?????	?????	?????	?????	?????	?????	?????	?????	?????	?????	?????	?????	?????	?????	?????	?????	?????	?????	?????	?????	?????	?????	?????	?????	?????	?????	?????	?????	?????	?????	?????	?????	?????	?????	?????	?????	?????	?????	?????	?????	?????	?????	?????
[truncated: 49 more columns]

## Sheet: Plate 8 - mediumB_30
Software Version	2001-09-02
Experiment File Path:	C:\Users\Public\Documents\Experiments\Bella\20190512_EE24.12.xpt
Protocol File Path:	C:\Users\Public\Documents\Protocols\Bella\EE22.prt
Plate Number	Plate 8
Date	2019-05-01
Time	10:29:48
Reader Type:	Synergy H1
Reader Serial Number:	266878
Reading Type	Reader
Procedure Details
Plate Type	Nunc 96 flat bottom generic
Discontinuous Kinetics	Runtime 22:00:00 (D:HH:MM), Interval 1:00:00, 23 Reads
	Pause after each run
Eject plate on completion
Shake	Double Orbital: 0:10 (MM:SS)
	Frequency: 365 cpm (2 mm)
Read	Absorbance Endpoint
	Full Plate
	Wavelengths: 600
	Read Speed: Sweep, Delay: 0 msec, Measurements/Data Point: 1
Shake	Linear: 0:02 (MM:SS)
	Frequency: 731 cpm (2 mm)
Read	Fluorescence Endpoint
	Full Plate
	Filter Set 1
	Excitation: 515, Emission: 545
	Optics: Top, Gain: 100
	Filter Set 2
	Excitation: 515, Emission: 545
	Optics: Top, Gain: 120
	Light Source: Xenon Flash, Lamp Energy: High
	Read Speed: Sweep, Delay: 0 msec, Measurements/Data Point: 1
	Read Height: 7 mm
Shake	Linear: 0:02 (MM:SS)
	Frequency: 731 cpm (2 mm)
Read	Fluorescence Endpoint
	Full Plate
	Filter Set 1
	Excitation: 425, Emission: 475
	Optics: Top, Gain: 100
	Filter Set 2
	Excitation: 425, Emission: 475
	Optics: Top, Gain: 60
	Light Source: Xenon Flash, Lamp Energy: High
	Read Speed: Sweep, Delay: 0 msec, Measurements/Data Point: 1
	Read Height: 7 mm
Layout
		1	2	3	4	5	6	7	8	9	10	11	12
	A	SPL1	SPL5	SPL9	SPL13	SPL17	SPL21	SPL25	SPL29	SPL33	SPL37	SPL44	SPL51	Well ID
	B	SPL2	SPL6	SPL10	SPL14	SPL18	SPL22	SPL26	SPL30	SPL34	SPL38	SPL45	SPL52	Well ID
	C	SPL3	SPL7	SPL11	SPL15	SPL19	SPL23	SPL27	SPL31	SPL35	SPL39	SPL46	SPL53	Well ID
	D	SPL4	SPL8	SPL12	SPL16	SPL20	BLK	BLK	SPL32	SPL36	SPL40	SPL47	SPL54	Well ID
	E	SPL58	SPL62	SPL66	SPL70	SPL74	SPL78	SPL82	SPL86	SPL90	SPL41	SPL48	SPL55	Well ID
	F	SPL59	SPL63	SPL67	SPL71	SPL75	SPL79	SPL83	SPL87	SPL91	SPL42	SPL49	SPL56	Well ID
	G	SPL60	SPL64	SPL68	SPL72	SPL76	SPL80	SPL84	SPL88	SPL92	SPL43	SPL50	SPL57	Well ID
	H	SPL61	SPL65	SPL69	SPL73	SPL77	BLK	BLK	SPL89	SPL93	SPL94	SPL95	SPL1	Well ID
Read 1:600
	Time	T° Read 1:600	A1	A2	A3	A4	A5	A6	A7	A8	A9	A10	A11	A12	B1	B2	B3	B4	B5	B6	B7	B8	B9	B10	B11	B12	C1	C2	C3	C4	C5	C6	C7	C8	C9	C10	C11	C12	D1	D2	D3	D4	D5	D6	D7	D8	D9	D10	D11
	00:00:11	33.9	0.172	0.154	0.156	0.165	0.159	0.16	0.163	0.158	0.179	0.172	0.177	0.187	0.155	0.173	0.173	0.169	0.179	0.187	0.186	0.189	0.179	0.182	0.177	0.208	0.17	0.191	0.236	0.236	0.246	0.209	0.221	0.23	0.234	0.229	0.192	0.2	0.16	0.199	0.266	0.326	0.309	0.301	0.295	0.268	0.227	0.218	0.182
	23:45:16	27.2	0.108	0.107	0.096	0.099	0.104	0.105	0.101	0.106	0.104	0.104	0.108	0.117	0.119	0.122	0.114	0.105	0.099	0.102	0.114	0.108	0.108	0.117	0.105	0.106	0.11	0.135	0.184	0.134	0.19	0.183	0.168	0.159	0.182	0.168	0.101	0.098	0.121	0.135	0.215	0.234	0.24	0.226	0.239	0.166	0.163	0.117	0.096
	1 day, 23:39:44	33.9	0.113	0.098	0.083	0.094	0.088	0.092	0.098	0.096	0.092	0.208	0.099	0.099	0.087	0.092	0.119	0.1	0.096	0.105	0.086	0.098	0.102	0.092	0.108	0.095	0.096	0.102	0.111	0.102	0.113	0.114	0.11	0.11	0.141	0.1	0.089	0.087	0.093	0.105	0.107	0.122	0.168	0.225	0.178	0.11	0.116	0.102	0.096
	2 days, 23:59:32	26.9	0.093	0.095	0.095	0.101	0.104	0.093	0.104	0.104	0.09	0.326	0.096	0.089	0.097	0.096	0.395	0.099	0.095	0.113	0.107	0.211	0.109	0.098	0.093	0.104	0.102	0.086	0.431	0.102	0.108	0.1	0.108	0.102	0.1	0.097	0.099	0.097	0.102	0.097	0.11	0.116	0.113	0.116	0.11	0.1	0.104	0.099	0.105
	3 days, 23:49:51	26.8	0.125	0.159	0.122	0.119	0.117	0.114	0.111	0.107	0.136	0.45	0.103	0.113	0.112	0.108	0.506	0.103	0.099	0.105	0.106	0.399	0.109	0.11	0.119	0.115	0.112	0.113	0.529	0.106	0.106	0.104	0.106	0.108	0.105	0.104	0.11	0.111	0.119	0.111	0.113	0.11	0.105	0.104	0.102	0.109	0.105	0.103	0.116
	4 days, 23:53:05	26.8	0.087	0.109	0.086	0.087	0.088	0.084	0.097	0.082	0.13	0.304	0.086	0.084	0.087	0.089	0.408	0.082	0.093	0.101	0.093	0.454	0.089	0.095	0.094	0.091	0.093	0.098	0.472	0.083	0.123	0.083	0.092	0.093	0.093	0.097	0.093	0.095	0.087	0.081	0.105	0.095	0.092	0.089	0.09	0.095	0.091	0.098	0.098
	5 days, 23:56:55	26.9	0.102	0.102	0.187	0.105	0.112	0.104	0.114	0.095	0.185	0.344	0.105	0.1	0.104	0.118	0.44	0.112	0.112	0.108	0.124	0.508	0.105	0.11	0.108	0.092	0.115	0.115	0.503	0.096	0.196	0.118	0.124	0.117	0.111	0.119	0.113	0.116	0.128	0.1	0.108	0.115	0.113	0.112	0.105	0.115	0.124	0.113	0.103
	7 days, 0:05:24	27	0.115	0.093	0.197	0.105	0.11	0.109	0.122	0.112	0.193	0.372	0.114	0.108	0.119	0.136	0.346	0.112	0.113	0.114	0.115	0.449	0.113	0.116	0.102	0.101	0.132	0.121	0.592	0.114	0.202	0.113	0.107	0.117	0.118	0.131	0.11	0.116	0.126	0.122	0.106	0.13	0.118	0.122	0.097	0.101	0.111	0.102	0.106
	8 days, 0:06:24	26.9	0.117	0.092	0.185	0.115	0.104	0.11	0.132	0.113	0.489	0.495	0.098	0.107	0.073	0.093	0.359	0.087	0.09	0.103	0.102	0.311	0.114	0.124	0.095	0.114	0.098	0.116	0.475	0.086	0.343	0.118	0.139	0.148	0.143	0.226	0.099	0.132	0.095	0.086	0.095	0.115	0.134	0.151	0.125	0.13	0.117	0.131	0.129
	8 days, 23:19:58	27.4	0.119	0.171	0.186	0.115	0.109	0.111	0.131	0.13	0.2	0.507	0.113	0.136	0.115	0.14	0.441	0.118	0.126	0.145	0.138	0.243	0.141	0.133	0.117	0.111	0.124	0.136	0.563	0.112	0.23	0.125	0.121	0.151	0.182	0.201	0.115	0.107	0.146	0.115	0.124	0.206	0.115	0.108	0.086	0.116	0.127	0.103	0.112
	10 days, 0:03:14	27.1	0.089	0.348	0.145	0.096	0.09	0.084	0.091	0.087	0.176	0.225	0.084	0.117	0.092	0.123	0.294	0.077	0.09	0.104	0.089	0.134	0.089	0.089	0.084	0.078	0.104	0.112	0.363	0.073	0.153	0.084	0.084	0.093	0.093	0.146	0.078	0.082	0.106	0.103	0.096	0.104	0.095	0.104	0.074	0.092	0.088	0.089	0.094
	10 days, 23:48:24	26.9	0.096	0.329	0.188	0.104	0.093	0.1	0.106	0.115	0.209	0.247	0.097	0.124	0.101	0.252	0.321	0.079	0.104	0.129	0.108	0.211	0.115	0.127	0.103	0.101	0.121	0.123	0.401	0.099	0.229	0.109	0.105	0.133	0.114	0.257	0.111	0.101	0.114	0.104	0.108	0.14	0.108	0.109	0.089	0.106	0.109	0.108	0.112
	00:00:00
	00:00:00
	00:00:00
	00:00:00
	00:00:00
	00:00:00
	00:00:00
	00:00:00
	00:00:00
	00:00:00
	00:00:00
Read 2:515,545
	Time	T° Read 2:515,545	A1	A2	A3	A4	A5	A6	A7	A8	A9	A10	A11	A12	B1	B2	B3	B4	B5	B6	B7	B8	B9	B10	B11	B12	C1	C2	C3	C4	C5	C6	C7	C8	C9	C10	C11	C12	D1	D2	D3	D4	D5	D6	D7	D8	D9	D10	D11
	00:00:03	33.9	193	217	144	248	208	141	238	238	224	201	208	238	230	282	251	225	134	249	215	269	204	251	251	145	186	284	249	215	211	224	202	213	205	183	233	258	247	207	329	212	222	214	197	201	170	174	203
	23:45:08	27.2	210	93	176	254	255	171	253	242	260	137	281	194	189	238	172	245	224	165	224	222	231	217	189	257	190	168	223	199	306	229	217	236	191	170	290	236	239	285	220	301	177	277	199	225	269	324	163
	1 day, 23:39:36	33.9	232	172	220	263	211	235	213	190	129	416	252	187	210	167	386	209	198	233	203	231	174	147	215	210	208	124	334	279	239	226	240	152	222	163	169	205	207	267	196	247	192	192	268	139	227	190	244
	2 days, 23:59:25	26.9	222	239	216	214	256	194	195	203	228	490	195	192	201	144	2401	232	256	215	205	278	155	243	246	318	303	117	1751	204	216	246	201	249	194	264	278	137	216	283	153	156	236	286	237	269	269	338	207
	3 days, 23:49:43	26.8	183	277	146	279	199	216	221	211	384	1212	181	199	221	158	3350	263	170	249	308	942	231	199	284	218	155	265	3126	173	196	274	253	228	299	268	165	253	200	247	197	183	155	257	264	174	209	191	185
	4 days, 23:52:58	26.8	229	185	236	208	212	191	253	282	1244	920	189	279	236	153	3448	257	183	129	254	1231	223	170	158	312	163	216	3754	263	361	243	229	201	251	254	177	208	270	250	136	195	183	246	227	244	267	254	241
	5 days, 23:56:47	26.9	196	222	560	262	246	293	257	196	1457	1062	195	208	245	275	2839	206	250	203	240	1681	268	194	257	186	159	202	3350	214	1298	216	270	241	210	255	238	204	283	233	175	342	253	158	250	302	179	184	211
	7 days, 0:05:17	27	313	181	794	260	116	227	279	236	1636	934	159	240	262	226	2490	194	244	288	229	1276	236	254	167	202	122	235	3645	259	1246	255	229	285	272	465	224	272	284	179	260	301	278	216	247	192	264	158	272
	8 days, 0:06:17	26.9	224	214	778	216	272	185	153	300	2293	1252	171	229	193	308	2912	239	222	198	282	1283	228	236	221	245	256	231	3460	234	1493	198	225	278	278	1036	229	228	197	275	206	269	174	114	301	149	289	131	309
	8 days, 23:19:51	27.4	208	422	803	169	202	114	184	252	1612	944	221	202	306	214	2353	207	234	275	227	762	171	189	247	253	277	185	3562	194	1433	184	261	193	234	671	247	252	257	221	247	165	151	176	149	197	243	184	243
	10 days, 0:03:06	27.1	244	2239	644	198	177	153	196	219	1407	910	258	179	236	308	2337	153	247	373	182	719	285	208	212	200	218	289	2721	271	1275	207	267	226	236	885	289	242	249	210	254	286	221	204	278	196	200	263	189
	10 days, 23:48:17	26.9	317	2522	1192	211	178	189	250	279	1750	1006	166	263	175	515	2370	273	160	361	218	1174	251	166	119	311	206	243	3337	255	1729	159	218	262	185	1315	171	341	196	254	237	147	258	210	178	302	263	217	189
	00:00:00
	00:00:00
	00:00:00
	00:00:00
	00:00:00
	00:00:00
	00:00:00
	00:00:00
	00:00:00
	00:00:00
	00:00:00
Read 2:515,545[2]
	Time	T° Read 2:515,545[2]	A1	A2	A3	A4	A5	A6	A7	A8	A9	A10	A11	A12	B1	B2	B3	B4	B5	B6	B7	B8	B9	B10	B11	B12	C1	C2	C3	C4	C5	C6	C7	C8	C9	C10	C11	C12	D1	D2	D3	D4	D5	D6	D7	D8	D9	D10	D11
	00:00:15	33.9	835	808	1012	1092	939	941	1010	832	1002	1072	963	896	897	781	816	1200	698	630	983	979	1013	1028	755	1144	793	714	982	913	924	792	985	871	892	1040	820	784	977	1003	690	805	785	900	958	882	956	921	796
	23:45:20	27.2	1032	1086	902	824	1031	808	895	1067	874	1078	851	721	763	1054	1006	844	835	1074	1091	911	1062	913	741	842	1049	987	1041	881	1037	943	845	1067	646	785	946	1077	814	985	873	693	997	706	808	858	716	633	801
	1 day, 23:39:48	33.9	749	902	896	900	901	602	952	628	863	1687	666	873	750	784	1004	936	869	788	826	907	944	791	670	855	694	757	904	770	985	777	746	859	794	739	1003	739	849	995	858	879	1127	899	1105	657	778	994	960
	2 days, 23:59:37	26.9	932	886	737	775	667	845	1026	774	770	2043	755	1244	725	1068	10558	872	841	619	841	1265	759	927	741	946	992	936	8506	973	876	735	1061	967	975	879	944	777	789	892	720	629	899	1116	932	913	997	866	955
	3 days, 23:49:55	26.8	1181	798	947	1058	850	931	1015	585	1629	4592	1085	1003	1006	857	13583	1189	1086	1076	1211	4189	1123	897	752	913	958	877	13927	564	797	1093	1196	837	995	1083	790	996	810	1053	724	643	1073	1209	999	807	1035	901	847
	4 days, 23:53:10	26.8	704	1046	899	1189	720	756	847	767	4429	3748	956	687	942	1147	14235	797	906	834	920	5729	841	822	1066	1077	923	806	15586	918	1906	781	741	809	806	1005	809	836	871	1046	750	953	1004	748	960	1084	732	1237	729
	5 days, 23:56:59	26.9	651	931	2094	1084	939	967	630	637	6717	4667	784	826	767	989	12778	730	848	1044	1032	7171	1013	1150	875	857	814	859	14387	823	5002	795	1164	866	1103	962	1080	931	1096	1088	1057	660	1104	1048	1005	1052	767	867	1002
	7 days, 0:05:29	27	861	1014	3209	803	1004	994	739	1024	6683	4559	1087	963	645	918	11055	831	1165	1136	953	5036	1015	883	865	1151	1188	1046	15029	1173	4636	938	876	1067	1025	1416	786	888	1111	1055	903	922	1158	951	793	780	1056	891	842
	8 days, 0:06:29	26.9	1012	825	3366	769	728	801	1031	1236	9023	4910	1099	761	933	615	11383	1051	805	1067	801	4999	822	884	736	1187	909	860	13394	981	6438	673	816	933	850	3531	921	1030	931	802	986	772	953	908	914	918	1098	790	866
	8 days, 23:20:03	27.4	1169	2066	2796	1004	936	997	834	917	5964	3637	871	771	833	908	9539	836	748	1284	863	3061	868	580	683	790	921	1157	13999	981	5424	748	605	947	691	2892	988	865	1110	500	669	1091	921	568	656	880	706	922	619
	10 days, 0:03:18	27.1	969	8608	2941	775	687	754	773	772	6264	3480	785	1025	738	1121	9143	914	938	1276	777	3493	689	983	771	949	722	977	11590	920	5135	741	1096	964	855	3056	942	921	730	745	900	1185	789	706	885	696	841	843	996
	10 days, 23:48:29	26.9	930	10315	3925	722	726	987	1201	1151	7188	4367	1042	1232	875	2099	11135	754	936	1372	989	4318	983	794	754	822	989	873	13926	995	7847	882	1005	873	877	5906	758	1043	961	842	570	1268	537	1042	888	697	990	960	883
	00:00:00
	00:00:00
	00:00:00
	00:00:00
	00:00:00
	00:00:00
	00:00:00
	00:00:00
	00:00:00
	00:00:00
	00:00:00
Read 3:425,475
	Time	T° Read 3:425,475	A1	A2	A3	A4	A5	A6	A7	A8	A9	A10	A11	A12	B1	B2	B3	B4	B5	B6	B7	B8	B9	B10	B11	B12	C1	C2	C3	C4	C5	C6	C7	C8	C9	C10	C11	C12	D1	D2	D3	D4	D5	D6	D7	D8	D9	D10	D11
	00:00:03	33.8	10079	10535	9488	10310	9614	9757	9516	9532	10124	9772	10395	10555	12339	11884	10714	9603	9863	10185	9266	9812	10004	9413	9482	10811	12045	13210	12046	11424	11050	10074	10347	10710	10426	9793	9748	10997	12361	12552	13700	13547	11828	10934	10464	9905	9778	10337	9541
	23:45:08	27.2	9189	8430	8000	7906	7624	7677	7822	7912	7857	7541	8188	8251	9693	9626	8395	7787	8047	7975	7612	7692	7873	7691	7298	8110	9916	11178	10055	8044	8494	9178	8083	8037	8324	7475	7420	8100	9509	9905	10391	8806	7898	8213	8271	7631	7759	7450	6796
	1 day, 23:39:36	33.8	7080	7647	7277	7278	7510	7514	7738	7632	7128	12012	7821	7933	7182	7384	25735	7281	7033	7795	7413	7027	7721	7658	7311	8384	8054	7756	14102	8041	7315	7858	7849	7633	7603	7395	7318	8034	7884	8847	7842	7522	8007	8655	7657	7584	7725	7834	7345
	2 days, 23:59:25	26.9	8527	9238	7708	8464	8776	8316	8771	8483	8484	21457	8419	8460	7788	8571	OVRFLW	7856	7877	9048	8123	12068	8506	7940	8576	8770	8626	8583	OVRFLW	8049	8428	8108	8503	8383	7233	8645	8675	8569	8545	7764	8695	8380	8146	7931	8700	8630	8093	8639	8510
	3 days, 23:49:43	26.8	8642	8546	8601	8969	8984	8394	8561	8272	47551	40054	10014	9083	8255	8553	OVRFLW	8098	8189	8635	8012	32786	8790	8562	9334	9962	8191	8315	OVRFLW	8107	8185	7540	7807	8286	8609	7806	8272	9146	8310	8404	8230	8587	7943	8042	7601	8358	7779	8686	8364
	4 days, 23:52:57	26.8	9251	8770	11170	9504	9299	8871	8391	8901	OVRFLW	37721	9887	9164	8524	8616	OVRFLW	8643	9296	10204	8810	43786	8782	8053	8720	9464	8500	8469	OVRFLW	7975	42380	8523	8777	8443	8048	8098	8614	9022	8426	8074	9022	7726	7711	7861	8378	8488	8961	8681	8519
	5 days, 23:56:46	26.9	9092	8517	61890	9469	8934	9988	8199	9123	OVRFLW	41330	9601	9652	8777	8609	OVRFLW	8933	9799	11744	9849	63334	8402	8332	8940	9213	8723	8606	OVRFLW	8349	OVRFLW	9283	8566	7883	7804	8396	9163	8590	8182	8715	10217	8348	9278	8546	8545	9031	9843	9209	9119
	7 days, 0:05:16	27	8991	8256	82631	8417	9052	8924	8210	8968	OVRFLW	37933	9473	8975	8773	8304	OVRFLW	8218	8976	11112	8530	45775	8515	8201	9004	8869	8725	8449	OVRFLW	8489	OVRFLW	8160	8485	8274	8317	33769	8619	7962	8288	8307	8976	7843	8930	8028	7922	8558	9067	9098	8447
	8 days, 0:06:17	26.9	11565	13334	87655	10263	10161	10221	9572	9463	OVRFLW	46029	10381	10235	9700	8794	OVRFLW	9869	10171	18370	10435	46992	10589	10045	11151	9503	9062	9743	OVRFLW	10061	OVRFLW	10117	10778	9242	9272	98678	10078	10270	9762	9735	10325	8892	10368	9149	8887	10659	10784	10488	10172
	8 days, 23:19:51	27.4	9784	50597	88307	9454	9128	9161	9320	8878	OVRFLW	33132	9393	10308	9786	8517	OVRFLW	8530	9122	15380	9439	31601	9029	8271	9850	8925	9311	9556	OVRFLW	8856	OVRFLW	9758	9672	8429	8799	85151	9439	9516	9569	9119	10094	9040	9174	8161	7631	9326	9377	8814	9531
	10 days, 0:03:06	27.1	9719	OVRFLW	75653	10102	9602	9524	9628	8507	OVRFLW	30611	10876	15966	10195	8970	OVRFLW	8460	10184	21747	9846	28953	8939	8687	10400	12038	9806	10030	OVRFLW	8614	OVRFLW	9749	9079	8717	8659	72288	9822	10234	9411	10297	9988	8109	10286	9510	7337	10877	10494	10014	10485
	10 days, 23:48:17	26.9	9274	OVRFLW	OVRFLW	9269	8306	8990	8998	8543	OVRFLW	32874	9199	22830	9786	16994	OVRFLW	7626	9455	24607	9647	41054	8837	8088	9633	9566	9151	9651	OVRFLW	8249	OVRFLW	9047	9325	7803	8669	OVRFLW	9142	8121	9142	8728	9111	8130	9425	7755	6757	9128	9525	9623	9651
	00:00:00
	00:00:00
	00:00:00
	00:00:00
	00:00:00
	00:00:00
	00:00:00
	00:00:00
	00:00:00
	00:00:00
	00:00:00
Read 3:425,475[2]
	Time	T° Read 3:425,475[2]	A1	A2	A3	A4	A5	A6	A7	A8	A9	A10	A11	A12	B1	B2	B3	B4	B5	B6	B7	B8	B9	B10	B11	B12	C1	C2	C3	C4	C5	C6	C7	C8	C9	C10	C11	C12	D1	D2	D3	D4	D5	D6	D7	D8	D9	D10	D11
	00:00:15	33.8	320	290	259	226	221	264	202	227	231	279	260	248	297	247	226	235	215	239	225	218	206	190	249	267	351	355	296	272	263	275	274	206	200	191	202	242	285	355	359	336	279	299	296	296	219	208	279
	23:45:20	27.2	281	197	218	224	221	201	227	219	216	162	178	269	239	213	159	237	165	181	220	183	161	220	159	222	280	275	204	232	173	273	180	153	184	134	184	209	257	242	280	230	173	224	242	168	137	164	158
	1 day, 23:39:48	33.8	173	176	166	218	203	189	198	205	180	305	168	155	149	199	633	205	205	214	167	191	201	158	224	247	212	212	370	143	189	198	209	194	161	217	228	162	188	214	156	169	140	240	184	164	179	200	163
	2 days, 23:59:37	26.9	237	243	170	232	175	202	256	185	203	503	239	239	183	227	7754	179	157	253	193	260	229	182	210	180	243	177	7588	216	165	228	164	223	210	162	212	194	198	220	166	183	226	215	171	189	244	242	193
	3 days, 23:49:55	26.8	172	199	232	226	238	223	222	198	1097	943	267	219	235	195	7904	174	210	179	175	750	226	228	243	234	194	193	7974	193	224	232	232	187	172	181	185	259	233	239	239	199	237	193	164	157	244	202	183
	4 days, 23:53:09	26.8	221	220	298	170	248	196	232	197	2619	890	251	188	276	207	8774	180	169	304	260	1050	186	215	249	241	232	164	9174	223	1074	233	209	219	239	205	252	251	216	202	251	204	217	222	159	208	242	223	173
	5 days, 23:56:58	26.9	141	198	1492	261	215	253	212	252	4049	961	198	308	186	220	8118	217	194	276	179	1551	197	198	266	188	242	174	8440	167	2772	276	229	147	186	221	204	209	185	205	250	174	223	198	222	263	201	192	212
	7 days, 0:05:28	27	191	188	2189	244	211	205	217	171	3899	891	246	213	248	191	5984	175	221	277	244	1100	164	184	274	214	189	237	7958	224	2920	213	222	226	234	842	220	155	218	196	206	175	216	203	255	187	236	231	224
	8 days, 0:06:29	26.9	325	321	2127	235	270	210	245	231	5866	1149	267	215	237	239	7369	309	269	409	278	1224	269	196	327	258	261	271	8736	202	3578	224	239	291	277	2623	275	256	211	241	267	211	272	271	176	281	300	263	265
	8 days, 23:20:03	27.4	275	1220	2138	227	220	210	177	229	3703	810	201	221	214	248	6507	190	222	320	250	770	225	229	238	163	247	238	8042	207	3780	243	278	174	238	2173	215	205	206	218	282	181	232	241	166	242	209	210	258
	10 days, 0:03:18	27.1	242	5918	1792	254	284	261	186	219	4117	732	281	369	292	184	5975	186	236	499	229	757	250	226	302	265	266	224	6911	235	2719	262	229	153	218	1727	241	272	236	240	234	177	223	151	195	268	264	245	244
	10 days, 23:48:29	26.9	250	6844	2671	249	191	207	244	170	4881	759	259	562	197	474	6447	159	268	601	197	994	204	247	250	265	185	217	7694	232	3827	216	198	199	215	3261	200	186	241	204	248	165	206	241	204	282	190	253	245
	00:00:00
	00:00:00
	00:00:00
	00:00:00
	00:00:00
	00:00:00
	00:00:00
	00:00:00
	00:00:00
	00:00:00
	00:00:00
Ratio yfp od
	Time	A1	A2	A3	A4	A5	A6	A7	A8	A9	A10	A11	A12	B1	B2	B3	B4	B5	B6	B7	B8	B9	B10	B11	B12	C1	C2	C3	C4	C5	C6	C7	C8	C9	C10	C11	C12	D1	D2	D3	D4	D5	D6	D7	D8	D9	D10	D11	D12
	00:00:03	1122.09	1405.44	920.716	1503.03	1305.71	880.15	1457.44	1510.15	1248.61	1169.96	1173.15	1270.01	1480.05	1629.12	1454.23	1331.36	749.022	1330.13	1157.16	1424.03	1137.12	1378.36	1414.88	698.122	1094.12	1488.47	1052.85	910.246	857.027	1069.21	912.788	927.296	876.818	800.175	1211.65	1287.42	1548.59	1040.72	1239.17	651.106	719.611	709.784	668.703	749.441	749.89	797.434	1116	1285.27
	23:45:08	1942.65	869.159	1827.62	2555.33	2447.22	1633.24	2509.92	2274.44	2497.6	1321.12	2609.1	1658.12	1585.57	1946.03	1515.42	2340.02	2258.07	1619.23	1958.04	2065.12	2138.89	1853.12	1808.61	2415.41	1725.7	1248.14	1215.26	1483.97	1614.78	1252.05	1291.67	1488.02	1051.18	1014.32	2868.45	2400.81	1971.95	2118.96	1021.36	1289.08	737.5	1227.84	831.592	1359.52	1652.33	2771.6	1696.15	1464.39
	1 day, 23:39:36	2056.74	1756.89	2663.44	2786.02	2400.45	2548.81	2166.84	1970.95	1402.17	2000	2550.61	1896.55	2416.57	1805.4	3240.97	2081.67	2058.21	2212.73	2374.27	2366.8	1710.91	1592.63	1998.14	2203.57	2159.92	1219.27	3000.9	2727.27	2122.56	1991.19	2189.78	1380.56	1578.95	1631.63	1894.62	2353.62	2218.65	2552.58	1831.78	2017.97	1144.9	852.954	1506.46	1263.64	1963.67	1857.28	2536.38	1746.54
	2 days, 23:59:25	2392.24	2518.44	2283.3	2116.72	2459.17	2083.78	1880.42	1959.46	2536.15	1501.69	2033.37	2154.88	2078.59	1493.78	6086.19	2355.33	2706.13	1900.97	1910.53	1315.04	1424.63	2482.12	2648.01	3054.76	2956.1	1352.6	4057.94	2003.93	1996.3	2469.88	1855.96	2429.27	1938.06	2732.92	2802.42	1409.46	2109.38	2920.54	1392.17	1347.15	2086.65	2459.16	2156.51	2703.52	2576.63	3424.52	1980.86	1610.67
	3 days, 23:49:43	1459.33	1737.77	1201.65	2342.57	1699.4	1898.07	2000	1966.45	2831.86	2694.53	1764.13	1764.18	1966.19	1464.32	6621.86	2548.45	1718.91	2375.95	2913.91	2362.68	2113.45	1805.81	2392.59	1890.72	1380.23	2345.13	5904.8	1639.81	1854.31	2642.24	2398.1	2113.07	2850.33	2576.92	1506.85	2277.23	1675.04	2231.26	1748	1666.67	1479.01	2475.91	2578.12	1594.87	1994.28	1847.19	1592.08	1588.79
	4 days, 23:52:58	2620.14	1694.14	2728.32	2399.08	2417.33	2281.96	2610.94	3460.12	9606.18	3021.35	2207.94	3305.69	2697.14	1717.17	8446.84	3134.15	1961.41	1275.96	2719.49	2714.44	2491.62	1797.04	1673.73	3421.05	1750.81	2210.85	7953.39	3153.48	2930.2	2924.19	2494.55	2170.63	2687.37	2632.12	1897.11	2189.47	3096.33	3101.74	1291.55	2052.63	1997.82	2770.27	2527.84	2582.01	2921.22	2591.84	2471.8	2051.79
	5 days, 23:56:47	1919.69	2176.47	3002.68	2507.18	2200.36	2820.02	2256.36	2074.07	7875.68	3083.62	1855.38	2082.08	2355.77	2334.47	6452.27	1847.53	2228.16	1881.37	1929.26	3310.36	2545.11	1763.64	2386.26	2012.99	1381.41	1753.47	6658.72	2222.22	6635.99	1835.17	2173.91	2051.06	1886.79	2135.68	2098.76	1761.66	2207.49	2325.35	1615.88	2976.5	2234.98	1406.95	2374.17	2632.96	1442.38	1635.56	2050.53	2393.82
	7 days, 0:05:17	2733.62	1939.98	4022.29	2476.19	1055.51	2078.76	2288.76	2103.39	8459.15	2509.4	1398.42	2224.28	2197.99	1664.21	7192.37	1735.24	2159.29	2524.1	1993.04	2844.41	2092.2	2187.77	1642.09	1992.11	921.45	1938.94	6157.1	2265.97	6180.56	2252.65	2140.19	2446.35	2303.13	3544.21	2034.51	2354.98	2257.55	1472.04	2443.61	2315.39	2361.94	1774.86	2549.02	1893.49	2380.52	1545.99	2561.2	1355.78
	8 days, 0:06:17	1916.17	2323.56	4212.24	1873.37	2615.39	1686.42	1159.97	2661.93	4688.2	2530.32	1743.12	2132.22	2636.61	3311.83	8120.47	2734.55	2453.04	1927.94	2764.71	4122.75	1994.75	1904.76	2338.62	2152.9	2614.91	1996.54	7285.74	2733.64	4350.23	1670.89	1619.87	1880.92	1937.28	4586.1	2313.13	1724.66	2075.87	3190.26	2163.87	2331.02	1302.39	755.467	2402.24	1145.27	2478.56	999.237	2404.67	1734.8
	8 days, 23:19:51	1742.04	2470.73	4328.84	1470.84	1846.43	1024.26	1405.65	1941.45	8064.03	1860.46	1948.85	1488.58	2670.16	1529.66	5341.66	1749.79	1861.58	1895.24	1643.74	3139.68	1211.05	1419.98	2120.17	2281.34	2230.27	1360.29	6324.57	1736.8	6225.02	1474.36	2162.39	1278.99	1287.13	3346.63	2144.1	2363.98	1755.46	1920.07	1985.53	799.806	1317.63	1634.17	1726.54	1702.68	1916.4	1786.41	2175.47	2603.6
	10 days, 0:03:06	2741.57	6432.06	4441.38	2056.07	1971.05	1827.96	2146.77	2525.95	8012.53	4037.27	3071.43	1531.22	2570.81	2502.03	7946.28	1984.44	2747.5	3593.45	2044.94	5361.67	3198.65	2342.34	2526.82	2554.28	2104.25	2573.46	7491.74	3692.1	8355.18	2464.29	3193.78	2419.7	2540.37	6057.49	3690.93	2958.43	2346.84	2046.78	2654.13	2739.46	2328.77	1954.02	3731.54	2130.43	2283.11	2948.43	2012.78	2617.87
	10 days, 23:48:17	3319.37	7672.65	6357.33	2021.07	1907.82	1891.89	2354.05	2419.78	8377.21	4077.83	1706.06	2115.85	1730.96	2045.27	7373.99	3446.97	1538.46	2796.28	2020.39	5556.08	2175.04	1310.18	1159.84	3088.38	1705.3	1978.83	8327.93	2580.97	7560.12	1453.38	2078.17	1977.36	1625.66	5112.75	1536.39	3379.58	1714.79	2447.01	2194.44	1051.5	2382.27	1924.84	2002.25	2849.06	2423.96	2007.4	1685.99	2483.8
	00:00:00	?????	?????	?????	?????	?????	?????	?????	?????	?????	?????	?????	?????	?????	?????	?????	?????	?????	?????	?????	?????	?????	?????	?????	?????	?????	?????	?????	?????	?????	?????	?????	?????	?????	?????	?????	?????	?????	?????	?????	?????	?????	?????	?????	?????	?????	?????	?????	?????
	00:00:00	?????	?????	?????	?????	?????	?????	?????	?????	?????	?????	?????	?????	?????	?????	?????	?????	?????	?????	?????	?????	?????	?????	?????	?????	?????	?????	?????	?????	?????	?????	?????	?????	?????	?????	?????	?????	?????	?????	?????	?????	?????	?????	?????	?????	?????	?????	?????	?????
	00:00:00	?????	?????	?????	?????	?????	?????	?????	?????	?????	?????	?????	?????	?????	?????	?????	?????	?????	?????	?????	?????	?????	?????	?????	?????	?????	?????	?????	?????	?????	?????	?????	?????	?????	?????	?????	?????	?????	?????	?????	?????	?????	?????	?????	?????	?????	?????	?????	?????
	00:00:00	?????	?????	?????	?????	?????	?????	?????	?????	?????	?????	?????	?????	?????	?????	?????	?????	?????	?????	?????	?????	?????	?????	?????	?????	?????	?????	?????	?????	?????	?????	?????	?????	?????	?????	?????	?????	?????	?????	?????	?????	?????	?????	?????	?????	?????	?????	?????	?????
	00:00:00	?????	?????	?????	?????	?????	?????	?????	?????	?????	?????	?????	?????	?????	?????	?????	?????	?????	?????	?????	?????	?????	?????	?????	?????	?????	?????	?????	?????	?????	?????	?????	?????	?????	?????	?????	?????	?????	?????	?????	?????	?????	?????	?????	?????	?????	?????	?????	?????
	00:00:00	?????	?????	?????	?????	?????	?????	?????	?????	?????	?????	?????	?????	?????	?????	?????	?????	?????	?????	?????	?????	?????	?????	?????	?????	?????	?????	?????	?????	?????	?????	?????	?????	?????	?????	?????	?????	?????	?????	?????	?????	?????	?????	?????	?????	?????	?????	?????	?????
	00:00:00	?????	?????	?????	?????	?????	?????	?????	?????	?????	?????	?????	?????	?????	?????	?????	?????	?????	?????	?????	?????	?????	?????	?????	?????	?????	?????	?????	?????	?????	?????	?????	?????	?????	?????	?????	?????	?????	?????	?????	?????	?????	?????	?????	?????	?????	?????	?????	?????
	00:00:00	?????	?????	?????	?????	?????	?????	?????	?????	?????	?????	?????	?????	?????	?????	?????	?????	?????	?????	?????	?????	?????	?????	?????	?????	?????	?????	?????	?????	?????	?????	?????	?????	?????	?????	?????	?????	?????	?????	?????	?????	?????	?????	?????	?????	?????	?????	?????	?????
	00:00:00	?????	?????	?????	?????	?????	?????	?????	?????	?????	?????	?????	?????	?????	?????	?????	?????	?????	?????	?????	?????	?????	?????	?????	?????	?????	?????	?????	?????	?????	?????	?????	?????	?????	?????	?????	?????	?????	?????	?????	?????	?????	?????	?????	?????	?????	?????	?????	?????
	00:00:00	?????	?????	?????	?????	?????	?????	?????	?????	?????	?????	?????	?????	?????	?????	?????	?????	?????	?????	?????	?????	?????	?????	?????	?????	?????	?????	?????	?????	?????	?????	?????	?????	?????	?????	?????	?????	?????	?????	?????	?????	?????	?????	?????	?????	?????	?????	?????	?????
	00:00:00	?????	?????	?????	?????	?????	?????	?????	?????	?????	?????	?????	?????	?????	?????	?????	?????	?????	?????	?????	?????	?????	?????	?????	?????	?????	?????	?????	?????	?????	?????	?????	?????	?????	?????	?????	?????	?????	?????	?????	?????	?????	?????	?????	?????	?????	?????	?????	?????
Ratio cfp od
	Time	A1	A2	A3	A4	A5	A6	A7	A8	A9	A10	A11	A12	B1	B2	B3	B4	B5	B6	B7	B8	B9	B10	B11	B12	C1	C2	C3	C4	C5	C6	C7	C8	C9	C10	C11	C12	D1	D2	D3	D4	D5	D6	D7	D8	D9	D10	D11	D12
	00:00:03	58598.8	68231.9	60665	62484.8	60351.5	60905.1	58273.1	60482.2	56432.6	56880.1	58629.4	56323.4	79401.5	68654	62074.2	56822.5	55131.4	54407.1	49870.8	51942.8	55763.7	51691.4	53449.8	52051	70852.9	69234.8	50934.5	48365.8	44882.2	48085.9	46755.5	46626	44593.7	42820.3	50691.6	54875.2	77498.4	63107.1	51600.8	41606.3	38340.4	36265.3	35519.3	36931.4	43131.9	47374	52451.9	53354.2
	23:45:08	85004.6	78785	83073.7	79537.2	73167	73323.8	77599.2	74360.9	75475.5	72719.4	76026	70521.4	81317.1	78708.1	73964.8	74374.4	81119	78263	66538.5	71553.5	72898.1	65678.9	69837.3	76221.8	90063.6	83046.1	54795.6	59985.1	44823.2	50180.4	48113.1	50674.7	45811.8	44600.2	73392.7	82400.8	78457.1	73643.1	48240.5	37713.1	32908.3	36405.1	34563.3	46108.8	47659.7	63729.7	70718	81233.7
	1 day, 23:39:36	62766	78110.3	88099.3	77097.5	85438	81496.7	78718.2	79170.1	77478.3	57750	79159.9	80456.4	82646.7	79827	216079	72519.9	73108.1	74026.6	86701.8	71998	75919.4	82968.6	67946.1	87974.8	83634.5	76263.5	126703	78602.2	64964.5	69233.5	71615	69327.9	54075.4	74024	82040.4	92238.8	84501.6	84579.4	73289.7	61454.2	47746	38449.6	43041	68945.5	66825.3	76578.7	76351.4	82651.8
	2 days, 23:59:25	91885.8	97344.6	81479.9	83719.1	84303.6	89323.3	84580.5	81882.2	94371.5	65758.5	87789.4	94949.5	80537.7	88910.8	?????	79756.3	83266.4	80000	75703.6	57086.1	78180.1	81103.2	92314.3	84245.9	84156.1	99225.4	?????	79066.8	77892.8	81405.6	78513.4	81785.4	72257.7	89492.8	87449.6	88158.4	83447.3	80123.8	79117.4	72366.1	72024.8	68194.3	79162.9	86733.7	77519.2	87527.9	81435.4	85424.9
	3 days, 23:49:43	68915.5	53613.6	70790.1	75306.5	76720.8	73761	77475.1	77092.3	350671	89048.5	97602.3	80523.1	73443.1	79267.8	?????	78469	82800.8	82395	75799.4	82232.3	80420.9	77695.1	78635.2	86400.7	72938.6	73584.1	?????	76843.6	77436.1	72709.7	74000	76793.3	82068.6	75057.7	75543.4	82322.2	69598	75916.9	73025.7	78205.8	75792	77475.9	74228.5	76608.6	74227.1	84003.9	71979.3	94822.4
	4 days, 23:52:57	105847	80311.4	129133	109619	106032	105986	86594.4	109215	?????	123878	115502	108578	97417.1	96700.3	?????	105402	99635.6	100930	94325.5	96551.3	98122.9	85126.9	92372.9	103772	91299.7	86683.7	?????	95623.5	343994	102563	95610	91177.1	86167	83917.1	92325.8	94968.4	96628.4	100174	85679	81326.3	84181.2	88524.8	93296.2	89820.1	98041.6	88581.6	87374.4	98745
	5 days, 23:56:46	89050	83500	331850	90612.4	79910.6	96130.9	71984.2	96539.7	?????	120006	91351.1	96616.6	84394.2	73081.5	?????	80116.6	87335.1	108842	79172	124722	79791.1	75745.5	83008.4	99707.8	75786.3	74704.9	?????	86697.8	?????	78870	68969.4	67089.4	70116.8	70318.3	80802.5	74179.6	63822.2	86976	94339.8	72654.5	81961.1	76099.7	81149.1	78735.8	79315.1	81857.8	88620	87963.3
	7 days, 0:05:16	78524	88488.7	418597	80161.9	82365.8	81721.6	67350.3	79928.7	?????	101916	83315.7	83178.9	73599	61148.7	?????	73506.3	79433.6	97388.3	74238.5	102040	75487.6	70637.4	88534.9	87465.5	65898.8	69711.2	?????	74269.5	?????	72084.8	79299.1	71021.5	70423.4	257386	78283.4	68935.1	65882.4	68314.1	84360.9	60330.8	75870.9	65965.5	81754.4	84398.4	81758.3	89021.5	79538.6	89281.2
	8 days, 0:06:17	98930.7	144777	474580	89011.3	97701.9	93172.3	72570.1	83966.3	?????	93025.5	105821	95298	132514	94559.1	?????	112918	112387	178870	102304	151003	92642.2	81073.4	118000	83506.2	92563.8	84209.2	?????	117535	?????	85375.5	77595.4	62530.4	64613.2	436822	101798	77685.3	102866	112935	108456	77053.7	77604.8	60629.6	70925.8	81929.3	92487.1	80000	79159.5	106361
	8 days, 23:19:51	81943	296235	476049	82280.2	83436.9	82309.1	71199.4	68397.5	?????	65297.6	82830.7	75961.7	85392.7	60879.2	?????	72104.8	72569.6	105996	68349	130206	63944.8	62141.2	84549.4	80477.9	74967.8	70264.7	?????	79283.8	?????	78189.1	80132.6	55858.2	48399.3	424693	81935.8	89268.3	65362	79226.8	81141.5	43819.7	80052.4	75775.3	88424.1	80605	73951.1	85572.8	85326.8	87675.7
	10 days, 0:03:06	109202	?????	521745	104901	106927	113787	105455	98120	?????	135807	129476	136578	111057	72867.6	?????	109728	113281	209509	110629	215906	100325	97826.6	123957	153742	94652.5	89314.3	?????	117357	?????	116060	108600	93329.8	93207.8	494784	125441	125110	88699.3	100361	104368	77672.4	108388	91092	98483.2	118228	119795	112265	111661	138275
	10 days, 23:48:17	97109.9	?????	?????	88783.5	89024.7	89990	84726.9	74093.7	?????	133255	94542.7	183669	96795.3	67490.1	?????	96287.9	90913.5	190604	89406.9	194292	76577.1	63835.8	93888.9	94995	75753.3	78591.2	?????	83491.9	?????	82696.5	88894.2	58890.6	76177.5	?????	82138.4	80485.6	79982.5	84084.8	84361.1	58154.5	87026.8	71081.6	76006.7	86113.2	87788	89019.4	86092.8	98876.9
	00:00:00	?????	?????	?????	?????	?????	?????	?????	?????	?????	?????	?????	?????	?????	?????	?????	?????	?????	?????	?????	?????	?????	?????	?????	?????	?????	?????	?????	?????	?????	?????	?????	?????	?????	?????	?????	?????	?????	?????	?????	?????	?????	?????	?????	?????	?????	?????	?????	?????
	00:00:00	?????	?????	?????	?????	?????	?????	?????	?????	?????	?????	?????	?????	?????	?????	?????	?????	?????	?????	?????	?????	?????	?????	?????	?????	?????	?????	?????	?????	?????	?????	?????	?????	?????	?????	?????	?????	?????	?????	?????	?????	?????	?????	?????	?????	?????	?????	?????	?????
	00:00:00	?????	?????	?????	?????	?????	?????	?????	?????	?????	?????	?????	?????	?????	?????	?????	?????	?????	?????	?????	?????	?????	?????	?????	?????	?????	?????	?????	?????	?????	?????	?????	?????	?????	?????	?????	?????	?????	?????	?????	?????	?????	?????	?????	?????	?????	?????	?????	?????
	00:00:00	?????	?????	?????	?????	?????	?????	?????	?????	?????	?????	?????	?????	?????	?????	?????	?????	?????	?????	?????	?????	?????	?????	?????	?????	?????	?????	?????	?????	?????	?????	?????	?????	?????	?????	?????	?????	?????	?????	?????	?????	?????	?????	?????	?????	?????	?????	?????	?????
	00:00:00	?????	?????	?????	?????	?????	?????	?????	?????	?????	?????	?????	?????	?????	?????	?????	?????	?????	?????	?????	?????	?????	?????	?????	?????	?????	?????	?????	?????	?????	?????	?????	?????	?????	?????	?????	?????	?????	?????	?????	?????	?????	?????	?????	?????	?????	?????	?????	?????
	00:00:00	?????	?????	?????	?????	?????	?????	?????	?????	?????	?????	?????	?????	?????	?????	?????	?????	?????	?????	?????	?????	?????	?????	?????	?????	?????	?????	?????	?????	?????	?????	?????	?????	?????	?????	?????	?????	?????	?????	?????	?????	?????	?????	?????	?????	?????	?????	?????	?????
	00:00:00	?????	?????	?????	?????	?????	?????	?????	?????	?????	?????	?????	?????	?????	?????	?????	?????	?????	?????	?????	?????	?????	?????	?????	?????	?????	?????	?????	?????	?????	?????	?????	?????	?????	?????	?????	?????	?????	?????	?????	?????	?????	?????	?????	?????	?????	?????	?????	?????
	00:00:00	?????	?????	?????	?????	?????	?????	?????	?????	?????	?????	?????	?????	?????	?????	?????	?????	?????	?????	?????	?????	?????	?????	?????	?????	?????	?????	?????	?????	?????	?????	?????	?????	?????	?????	?????	?????	?????	?????	?????	?????	?????	?????	?????	?????	?????	?????	?????	?????
	00:00:00	?????	?????	?????	?????	?????	?????	?????	?????	?????	?????	?????	?????	?????	?????	?????	?????	?????	?????	?????	?????	?????	?????	?????	?????	?????	?????	?????	?????	?????	?????	?????	?????	?????	?????	?????	?????	?????	?????	?????	?????	?????	?????	?????	?????	?????	?????	?????	?????
	00:00:00	?????	?????	?????	?????	?????	?????	?????	?????	?????	?????	?????	?????	?????	?????	?????	?????	?????	?????	?????	?????	?????	?????	?????	?????	?????	?????	?????	?????	?????	?????	?????	?????	?????	?????	?????	?????	?????	?????	?????	?????	?????	?????	?????	?????	?????	?????	?????	?????
	00:00:00	?????	?????	?????	?????	?????	?????	?????	?????	?????	?????	?????	?????	?????	?????	?????	?????	?????	?????	?????	?????	?????	?????	?????	?????	?????	?????	?????	?????	?????	?????	?????	?????	?????	?????	?????	?????	?????	?????	?????	?????	?????	?????	?????	?????	?????	?????	?????	?????
Ratio yfp cfp
	Time	A1	A2	A3	A4	A5	A6	A7	A8	A9	A10	A11	A12	B1	B2	B3	B4	B5	B6	B7	B8	B9	B10	B11	B12	C1	C2	C3	C4	C5	C6	C7	C8	C9	C10	C11	C12	D1	D2	D3	D4	D5	D6	D7	D8	D9	D10	D11	D12
	00:00:15	2.609	2.786	3.907	4.832	4.249	3.564	5	3.665	4.338	3.842	3.704	3.613	3.02	3.162	3.611	5.106	3.247	2.636	4.369	4.491	4.917	5.411	3.032	4.285	2.259	2.011	3.318	3.357	3.513	2.88	3.595	4.228	4.46	5.445	4.059	3.24	3.428	2.825	1.922	2.396	2.814	3.01	3.236	2.98	4.365	4.428	2.853	3.286
	23:45:20	3.673	5.513	4.138	3.679	4.665	4.02	3.943	4.872	4.046	6.654	4.781	2.68	3.192	4.948	6.327	3.561	5.061	5.934	4.959	4.978	6.596	4.15	4.66	3.793	3.746	3.589	5.103	3.797	5.994	3.454	4.694	6.974	3.511	5.858	5.141	5.153	3.167	4.07	3.118	3.013	5.763	3.152	3.339	5.107	5.226	3.86	5.07	3.14
	1 day, 23:39:48	4.329	5.125	5.398	4.128	4.438	3.185	4.808	3.063	4.794	5.531	3.964	5.632	5.034	3.94	1.586	4.566	4.239	3.682	4.946	4.749	4.697	5.006	2.991	3.462	3.274	3.571	2.443	5.385	5.212	3.924	3.569	4.428	4.932	3.406	4.399	4.562	4.516	4.65	5.5	5.201	8.05	3.746	6.005	4.006	4.346	4.97	5.89	4.005
	2 days, 23:59:37	3.932	3.646	4.335	3.341	3.811	4.183	4.008	4.184	3.793	4.062	3.159	5.205	3.962	4.705	1.362	4.872	5.357	2.447	4.358	4.865	3.314	5.093	3.529	5.256	4.082	5.288	1.121	4.505	5.309	3.224	6.47	4.336	4.643	5.426	4.453	4.005	3.985	4.055	4.337	3.437	3.978	5.191	5.45	4.831	4.086	3.579	4.948	3.764
	3 days, 23:49:55	6.866	4.01	4.082	4.681	3.571	4.175	4.572	2.955	1.485	4.87	4.064	4.58	4.281	4.395	1.718	6.833	5.171	6.011	6.92	5.585	4.969	3.934	3.095	3.902	4.938	4.544	1.747	2.922	3.558	4.711	5.155	4.476	5.785	5.983	4.27	3.846	3.476	4.406	3.029	3.231	4.527	6.264	6.091	5.14	4.242	4.46	4.628	3.49
	4 days, 23:53:10	3.186	4.755	3.017	6.994	2.903	3.857	3.651	3.893	1.691	4.211	3.809	3.654	3.413	5.541	1.622	4.428	5.361	2.743	3.538	5.456	4.522	3.823	4.281	4.469	3.978	4.915	1.699	4.117	1.775	3.352	3.545	3.694	3.372	4.902	3.21	3.331	4.032	5.178	2.988	4.672	4.627	3.369	6.038	5.212	3.025	5.547	4.214	3.772
	5 days, 23:56:59	4.617	4.702	1.403	4.153	4.367	3.822	2.972	2.528	1.659	4.856	3.96	2.682	4.124	4.495	1.574	3.364	4.371	3.783	5.765	4.623	5.142	5.808	3.289	4.559	3.364	4.937	1.705	4.928	1.804	2.88	5.083	5.891	5.93	4.353	5.294	4.455	5.924	5.307	4.228	3.793	4.951	5.293	4.527	4	3.816	4.516	4.726	4.026
	7 days, 0:05:29	4.508	5.394	1.466	3.291	4.758	4.849	3.406	5.988	1.714	5.117	4.419	4.521	2.601	4.806	1.847	4.749	5.271	4.101	3.906	4.578	6.189	4.799	3.157	5.379	6.286	4.414	1.889	5.237	1.588	4.404	3.946	4.721	4.38	1.682	3.573	5.729	5.096	5.383	4.383	5.269	5.361	4.685	3.11	4.171	4.475	3.857	3.759	2.892
	8 days, 0:06:29	3.114	2.57	1.583	3.272	2.696	3.814	4.208	5.351	1.538	4.273	4.116	3.54	3.937	2.573	1.545	3.401	2.993	2.609	2.881	4.084	3.056	4.51	2.251	4.601	3.483	3.173	1.533	4.856	1.799	3.004	3.414	3.206	3.069	1.346	3.349	4.023	4.412	3.328	3.693	3.659	3.504	3.351	5.193	3.267	3.66	3.004	3.268	3.368
	8 days, 23:20:03	4.251	1.693	1.308	4.423	4.255	4.748	4.712	4.004	1.611	4.49	4.333	3.489	3.893	3.661	1.466	4.4	3.369	4.013	3.452	3.975	3.858	2.533	2.87	4.847	3.729	4.861	1.741	4.739	1.435	3.078	2.176	5.443	2.903	1.331	4.595	4.22	5.388	2.294	2.372	6.028	3.97	2.357	3.952	3.636	3.378	4.39	2.399	5.253
	10 days, 0:03:18	4.004	1.455	1.641	3.051	2.419	2.889	4.156	3.525	1.521	4.754	2.794	2.778	2.527	6.092	1.53	4.914	3.975	2.557	3.393	4.614	2.756	4.35	2.553	3.581	2.714	4.362	1.677	3.915	1.889	2.828	4.786	6.301	3.922	1.77	3.909	3.386	3.093	3.104	3.846	6.695	3.538	4.675	4.538	2.597	3.186	3.441	4.082	3.442
	10 days, 23:48:29	3.72	1.507	1.469	2.9	3.801	4.768	4.922	6.771	1.473	5.754	4.023	2.192	4.442	4.428	1.727	4.742	3.493	2.283	5.02	4.344	4.819	3.215	3.016	3.102	5.346	4.023	1.81	4.289	2.05	4.083	5.076	4.387	4.079	1.811	3.79	5.608	3.988	4.127	2.298	7.685	2.607	4.324	4.353	2.472	5.211	3.794	3.604	4.676
	00:00:00	?????	?????	?????	?????	?????	?????	?????	?????	?????	?????	?????	?????	?????	?????	?????	?????	?????	?????	?????	?????	?????	?????	?????	?????	?????	?????	?????	?????	?????	?????	?????	?????	?????	?????	?????	?????	?????	?????	?????	?????	?????	?????	?????	?????	?????	?????	?????	?????
	00:00:00	?????	?????	?????	?????	?????	?????	?????	?????	?????	?????	?????	?????	?????	?????	?????	?????	?????	?????	?????	?????	?????	?????	?????	?????	?????	?????	?????	?????	?????	?????	?????	?????	?????	?????	?????	?????	?????	?????	?????	?????	?????	?????	?????	?????	?????	?????	?????	?????
	00:00:00	?????	?????	?????	?????	?????	?????	?????	?????	?????	?????	?????	?????	?????	?????	?????	?????	?????	?????	?????	?????	?????	?????	?????	?????	?????	?????	?????	?????	?????	?????	?????	?????	?????	?????	?????	?????	?????	?????	?????	?????	?????	?????	?????	?????	?????	?????	?????	?????
	00:00:00	?????	?????	?????	?????	?????	?????	?????	?????	?????	?????	?????	?????	?????	?????	?????	?????	?????	?????	?????	?????	?????	?????	?????	?????	?????	?????	?????	?????	?????	?????	?????	?????	?????	?????	?????	?????	?????	?????	?????	?????	?????	?????	?????	?????	?????	?????	?????	?????
	00:00:00	?????	?????	?????	?????	?????	?????	?????	?????	?????	?????	?????	?????	?????	?????	?????	?????	?????	?????	?????	?????	?????	?????	?????	?????	?????	?????	?????	?????	?????	?????	?????	?????	?????	?????	?????	?????	?????	?????	?????	?????	?????	?????	?????	?????	?????	?????	?????	?????
	00:00:00	?????	?????	?????	?????	?????	?????	?????	?????	?????	?????	?????	?????	?????	?????	?????	?????	?????	?????	?????	?????	?????	?????	?????	?????	?????	?????	?????	?????	?????	?????	?????	?????	?????	?????	?????	?????	?????	?????	?????	?????	?????	?????	?????	?????	?????	?????	?????	?????
	00:00:00	?????	?????	?????	?????	?????	?????	?????	?????	?????	?????	?????	?????	?????	?????	?????	?????	?????	?????	?????	?????	?????	?????	?????	?????	?????	?????	?????	?????	?????	?????	?????	?????	?????	?????	?????	?????	?????	?????	?????	?????	?????	?????	?????	?????	?????	?????	?????	?????
	00:00:00	?????	?????	?????	?????	?????	?????	?????	?????	?????	?????	?????	?????	?????	?????	?????	?????	?????	?????	?????	?????	?????	?????	?????	?????	?????	?????	?????	?????	?????	?????	?????	?????	?????	?????	?????	?????	?????	?????	?????	?????	?????	?????	?????	?????	?????	?????	?????	?????
	00:00:00	?????	?????	?????	?????	?????	?????	?????	?????	?????	?????	?????	?????	?????	?????	?????	?????	?????	?????	?????	?????	?????	?????	?????	?????	?????	?????	?????	?????	?????	?????	?????	?????	?????	?????	?????	?????	?????	?????	?????	?????	?????	?????	?????	?????	?????	?????	?????	?????
	00:00:00	?????	?????	?????	?????	?????	?????	?????	?????	?????	?????	?????	?????	?????	?????	?????	?????	?????	?????	?????	?????	?????	?????	?????	?????	?????	?????	?????	?????	?????	?????	?????	?????	?????	?????	?????	?????	?????	?????	?????	?????	?????	?????	?????	?????	?????	?????	?????	?????
	00:00:00	?????	?????	?????	?????	?????	?????	?????	?????	?????	?????	?????	?????	?????	?????	?????	?????	?????	?????	?????	?????	?????	?????	?????	?????	?????	?????	?????	?????	?????	?????	?????	?????	?????	?????	?????	?????	?????	?????	?????	?????	?????	?????	?????	?????	?????	?????	?????	?????
Ratio cfp2 od
	Time	A1	A2	A3	A4	A5	A6	A7	A8	A9	A10	A11	A12	B1	B2	B3	B4	B5	B6	B7	B8	B9	B10	B11	B12	C1	C2	C3	C4	C5	C6	C7	C8	C9	C10	C11	C12	D1	D2	D3	D4	D5	D6	D7	D8	D9	D10	D11	D12
	00:00:15	1860.46	1878.24	1656.01	1369.7	1387.32	1647.94	1236.99	1440.36	1287.62	1623.98	1466.44	1323.37	1911.2	1426.92	1309.39	1390.53	1201.79	1276.71	1210.98	1154.05	1148.27	1043.38	1403.61	1285.51	2064.71	1860.59	1251.59	1151.57	1068.24	1312.65	1238.14	896.822	855.432	835.155	1050.44	1207.59	1786.83	1784.82	1352.17	1031.94	904.376	991.708	1004.75	1103.65	966.034	953.254	1533.81	1353.19
	23:45:20	2599.45	1841.12	2263.76	2253.52	2120.92	1919.77	2251.98	2058.27	2074.93	1562.2	1652.74	2299.14	2005.03	1741.62	1400.88	2263.61	1663.31	1776.25	1923.08	1702.33	1490.74	1878.74	1521.53	2086.47	2543.14	2043.09	1111.72	1730.05	912.929	1492.62	1071.43	964.691	1012.66	799.523	1819.98	2126.14	2120.46	1799.26	1299.91	985.011	720.833	992.908	1011.28	1015.11	841.523	1402.91	1644.12	2226.68
	1 day, 23:39:48	1533.69	1797.75	2009.68	2309.32	2309.44	2049.89	2014.24	2126.56	1956.52	1466.35	1700.4	1572.01	1714.61	2151.35	5314.86	2041.83	2130.98	2032.29	1953.22	1956.97	1976.4	1711.81	2081.78	2591.82	2201.45	2084.56	3324.35	1397.85	1678.51	1744.49	1906.93	1762.04	1145.09	2172.17	2556.05	1859.93	2015.01	2045.89	1457.94	1380.72	834.824	1066.19	1034.29	1490.91	1548.44	1955.03	1694.39	1991.48
	2 days, 23:59:37	2553.88	2560.59	1797.04	2294.76	1681.08	2169.71	2468.66	1785.71	2258.07	1541.53	2492.18	2682.38	1892.45	2354.77	19655.3	1817.26	1659.62	2236.96	1798.69	1229.9	2104.78	1859.04	2260.49	1729.11	2370.73	2046.24	17585.2	2121.81	1524.95	2289.16	1514.31	2175.61	2097.9	1677.02	2137.1	1995.88	1933.59	2270.38	1510.46	1580.31	1998.23	1848.67	1555.96	1899.5	2337.16	2451.87	1846.89	2005.93
	3 days, 23:49:55	1371.61	1248.43	1909.46	1897.57	2032.45	1959.58	2009.05	1845.29	8089.97	2096.49	2602.34	1941.49	2090.75	1807.23	15623.6	1686.05	2123.36	1708.02	1655.63	1881.11	2067.7	2068.97	2047.18	2029.49	1727.52	1707.96	15062.3	1829.38	2119.2	2237.22	2199.05	1733.09	1639.66	1740.38	1689.5	2331.23	1951.42	2158.99	2120.67	1812.39	2261.45	1859.35	1601.56	1439.05	2328.24	1953.58	1574.87	1943.92
	4 days, 23:53:09	2528.6	2014.65	3445.09	1960.78	2827.82	2341.7	2394.22	2417.18	20223.9	2922.82	2932.24	2227.49	3154.29	2323.23	21494.4	2195.12	1811.36	3006.92	2783.73	2315.32	2078.21	2272.73	2637.71	2642.54	2491.94	1678.61	19436.4	2673.86	8717.53	2803.85	2276.69	2365.01	2558.89	2124.35	2700.97	2642.11	2477.06	2506.2	2383.67	2147.37	2369	2500	1770.6	2201.06	2647.7	2275.51	1774.36	2838.64
	5 days, 23:56:58	1381	1941.18	8000	2497.61	1923.08	2435.03	1861.28	2666.67	21886.5	2790.36	1883.92	3083.08	1788.46	1867.57	18450	1946.19	1729.06	2557.92	1438.91	3054.35	1870.85	1800	2469.82	2034.63	2102.52	1510.42	16776	1734.16	14171.8	2344.95	1843.8	1251.06	1671.16	1850.92	1798.94	1804.84	1443.06	2045.91	2308.4	1514.36	1969.96	1763.13	2108.26	2292.94	1619.66	1706.67	2060.25	2191.12
	7 days, 0:05:28	1668.12	2015.01	11089.2	2323.81	1919.93	1877.29	1780.15	1524.06	20160.3	2393.87	2163.59	1974.05	2080.54	1406.48	17284.8	1565.3	1955.75	2427.7	2123.59	2452.07	1453.9	1584.84	2694.2	2110.45	1427.49	1955.45	13442.6	1959.76	14484.1	1881.62	2074.77	1939.91	1981.37	6417.68	1998.18	1341.99	1732.91	1611.84	1936.09	1346.15	1835.17	1668.04	2631.58	1844.18	2128.04	2260.27	2109.23	2192.9
	8 days, 0:06:29	2780.15	3485.34	11516	2038.16	2596.15	1914.31	1857.47	2049.69	11993.5	2322.15	2721.71	2001.86	3237.7	2569.89	20549.4	3535.47	2972.38	3982.47	2725.49	3933.16	2353.46	1581.92	3460.32	2267.14	2665.99	2342.26	18395.5	2359.81	10425.4	1890.3	1720.66	1968.88	1930.31	11611.3	2777.78	1936.46	2223.39	2795.82	2804.62	1828.42	2035.93	1795.89	1404.63	2159.88	2572.9	2006.1	2062.26	2492.52
	8 days, 23:20:03	2303.18	7142.86	11525.6	1975.63	2010.97	1886.79	1352.18	1764.25	18524.3	1596.37	1772.49	1628.59	1867.37	1772.69	14771.9	1606.09	1766.11	2205.38	1810.28	3172.64	1593.48	1720.51	2042.92	1469.79	1988.73	1750	14279.1	1853.18	16420.5	1947.12	2303.23	1153.08	1309.13	10837.9	1866.32	1923.08	1407.1	1894.01	2266.88	877.363	2024.43	2237.7	1923.52	2091.62	1648.27	2038.84	2309.76	1747.75
	10 days, 0:03:18	2719.1	17000.9	12358.6	2637.59	3162.58	3118.28	2037.24	2525.95	23445.3	3247.56	3345.24	3156.54	3180.83	1494.72	20316.2	2412.45	2625.14	4807.32	2573.03	5645.04	2805.84	2545.05	3599.52	3384.42	2567.57	1994.66	19028.1	3201.64	17817.8	3119.05	2739.23	1638.12	2346.61	11820.7	3077.91	3325.18	2224.32	2339.18	2445.14	1695.4	2349.84	1446.36	2617.45	2913.04	3013.7	2746.64	2598.51	3225.81
	10 days, 23:48:29	2617.8	20821.4	14245.3	2385.06	2047.16	2072.07	2297.55	1474.41	23365.2	3076.61	2661.87	4521.32	1948.57	1882.45	20059.1	2007.58	2576.92	4655.31	1825.77	4704.21	1767.76	1949.49	2436.65	2631.58	1531.46	1767.1	19201.4	2348.18	16733.7	1974.41	1887.51	1501.89	1889.28	12678.8	1796.94	1843.41	2108.49	1965.32	2296.3	1180.26	1902.12	2208.98	2294.71	2660.38	1751.15	2340.43	2185.55	2203.02
	00:00:00	?????	?????	?????	?????	?????	?????	?????	?????	?????	?????	?????	?????	?????	?????	?????	?????	?????	?????	?????	?????	?????	?????	?????	?????	?????	?????	?????	?????	?????	?????	?????	?????	?????	?????	?????	?????	?????	?????	?????	?????	?????	?????	?????	?????	?????	?????	?????	?????
	00:00:00	?????	?????	?????	?????	?????	?????	?????	?????	?????	?????	?????	?????	?????	?????	?????	?????	?????	?????	?????	?????	?????	?????	?????	?????	?????	?????	?????	?????	?????	?????	?????	?????	?????	?????	?????	?????	?????	?????	?????	?????	?????	?????	?????	?????	?????	?????	?????	?????
	00:00:00	?????	?????	?????	?????	?????	?????	?????	?????	?????	?????	?????	?????	?????	?????	?????	?????	?????	?????	?????	?????	?????	?????	?????	?????	?????	?????	?????	?????	?????	?????	?????	?????	?????	?????	?????	?????	?????	?????	?????	?????	?????	?????	?????	?????	?????	?????	?????	?????
	00:00:00	?????	?????	?????	?????	?????	?????	?????	?????	?????	?????	?????	?????	?????	?????	?????	?????	?????	?????	?????	?????	?????	?????	?????	?????	?????	?????	?????	?????	?????	?????	?????	?????	?????	?????	?????	?????	?????	?????	?????	?????	?????	?????	?????	?????	?????	?????	?????	?????
	00:00:00	?????	?????	?????	?????	?????	?????	?????	?????	?????	?????	?????	?????	?????	?????	?????	?????	?????	?????	?????	?????	?????	?????	?????	?????	?????	?????	?????	?????	?????	?????	?????	?????	?????	?????	?????	?????	?????	?????	?????	?????	?????	?????	?????	?????	?????	?????	?????	?????
	00:00:00	?????	?????	?????	?????	?????	?????	?????	?????	?????	?????	?????	?????	?????	?????	?????	?????	?????	?????	?????	?????	?????	?????	?????	?????	?????	?????	?????	?????	?????	?????	?????	?????	?????	?????	?????	?????	?????	?????	?????	?????	?????	?????	?????	?????	?????	?????	?????	?????
	00:00:00	?????	?????	?????	?????	?????	?????	?????	?????	?????	?????	?????	?????	?????	?????	?????	?????	?????	?????	?????	?????	?????	?????	?????	?????	?????	?????	?????	?????	?????	?????	?????	?????	?????	?????	?????	?????	?????	?????	?????	?????	?????	?????	?????	?????	?????	?????	?????	?????
	00:00:00	?????	?????	?????	?????	?????	?????	?????	?????	?????	?????	?????	?????	?????	?????	?????	?????	?????	?????	?????	?????	?????	?????	?????	?????	?????	?????	?????	?????	?????	?????	?????	?????	?????	?????	?????	?????	?????	?????	?????	?????	?????	?????	?????	?????	?????	?????	?????	?????
	00:00:00	?????	?????	?????	?????	?????	?????	?????	?????	?????	?????	?????	?????	?????	?????	?????	?????	?????	?????	?????	?????	?????	?????	?????	?????	?????	?????	?????	?????	?????	?????	?????	?????	?????	?????	?????	?????	?????	?????	?????	?????	?????	?????	?????	?????	?????	?????	?????	?????
	00:00:00	?????	?????	?????	?????	?????	?????	?????	?????	?????	?????	?????	?????	?????	?????	?????	?????	?????	?????	?????	?????	?????	?????	?????	?????	?????	?????	?????	?????	?????	?????	?????	?????	?????	?????	?????	?????	?????	?????	?????	?????	?????	?????	?????	?????	?????	?????	?????	?????
	00:00:00	?????	?????	?????	?????	?????	?????	?????	?????	?????	?????	?????	?????	?????	?????	?????	?????	?????	?????	?????	?????	?????	?????	?????	?????	?????	?????	?????	?????	?????	?????	?????	?????	?????	?????	?????	?????	?????	?????	?????	?????	?????	?????	?????	?????	?????	?????	?????	?????
[truncated: 49 more columns]

## Sheet: Plate 9 - mediumA_30
Software Version	2001-09-02
Experiment File Path:	C:\Users\Public\Documents\Experiments\Bella\20190512_EE24.12.xpt
Protocol File Path:	C:\Users\Public\Documents\Protocols\Bella\EE22.prt
Plate Number	Plate 9
Date	2019-05-01
Time	10:31:41
Reader Type:	Synergy H1
Reader Serial Number:	266878
Reading Type	Reader
Procedure Details
Plate Type	Nunc 96 flat bottom generic
Discontinuous Kinetics	Runtime 22:00:00 (D:HH:MM), Interval 1:00:00, 23 Reads
	Pause after each run
Eject plate on completion
Shake	Double Orbital: 0:10 (MM:SS)
	Frequency: 365 cpm (2 mm)
Read	Absorbance Endpoint
	Full Plate
	Wavelengths: 600
	Read Speed: Sweep, Delay: 0 msec, Measurements/Data Point: 1
Shake	Linear: 0:02 (MM:SS)
	Frequency: 731 cpm (2 mm)
Read	Fluorescence Endpoint
	Full Plate
	Filter Set 1
	Excitation: 515, Emission: 545
	Optics: Top, Gain: 100
	Filter Set 2
	Excitation: 515, Emission: 545
	Optics: Top, Gain: 120
	Light Source: Xenon Flash, Lamp Energy: High
	Read Speed: Sweep, Delay: 0 msec, Measurements/Data Point: 1
	Read Height: 7 mm
Shake	Linear: 0:02 (MM:SS)
	Frequency: 731 cpm (2 mm)
Read	Fluorescence Endpoint
	Full Plate
	Filter Set 1
	Excitation: 425, Emission: 475
	Optics: Top, Gain: 100
	Filter Set 2
	Excitation: 425, Emission: 475
	Optics: Top, Gain: 60
	Light Source: Xenon Flash, Lamp Energy: High
	Read Speed: Sweep, Delay: 0 msec, Measurements/Data Point: 1
	Read Height: 7 mm
Layout
		1	2	3	4	5	6	7	8	9	10	11	12
	A	SPL1	SPL5	SPL9	SPL13	SPL17	SPL21	SPL25	SPL29	SPL33	SPL37	SPL44	SPL51	Well ID
	B	SPL2	SPL6	SPL10	SPL14	SPL18	SPL22	SPL26	SPL30	SPL34	SPL38	SPL45	SPL52	Well ID
	C	SPL3	SPL7	SPL11	SPL15	SPL19	SPL23	SPL27	SPL31	SPL35	SPL39	SPL46	SPL53	Well ID
	D	SPL4	SPL8	SPL12	SPL16	SPL20	BLK	BLK	SPL32	SPL36	SPL40	SPL47	SPL54	Well ID
	E	SPL58	SPL62	SPL66	SPL70	SPL74	SPL78	SPL82	SPL86	SPL90	SPL41	SPL48	SPL55	Well ID
	F	SPL59	SPL63	SPL67	SPL71	SPL75	SPL79	SPL83	SPL87	SPL91	SPL42	SPL49	SPL56	Well ID
	G	SPL60	SPL64	SPL68	SPL72	SPL76	SPL80	SPL84	SPL88	SPL92	SPL43	SPL50	SPL57	Well ID
	H	SPL61	SPL65	SPL69	SPL73	SPL77	BLK	BLK	SPL89	SPL93	SPL94	SPL95	SPL1	Well ID
Read 1:600
	Time	T° Read 1:600	A1	A2	A3	A4	A5	A6	A7	A8	A9	A10	A11	A12	B1	B2	B3	B4	B5	B6	B7	B8	B9	B10	B11	B12	C1	C2	C3	C4	C5	C6	C7	C8	C9	C10	C11	C12	D1	D2	D3	D4	D5	D6	D7	D8	D9	D10	D11
	00:00:11	33.7	0.161	0.14	0.146	0.156	0.151	0.158	0.161	0.151	0.139	0.127	0.14	0.139	0.172	0.186	0.172	0.171	0.174	0.189	0.182	0.182	0.176	0.135	0.131	0.122	0.19	0.184	0.213	0.253	0.262	0.247	0.232	0.255	0.231	0.175	0.146	0.131	0.17	0.196	0.256	0.333	0.341	0.348	0.325	0.326	0.29	0.231	0.129
	23:45:09	27.2	0.111	0.082	0.087	0.095	0.066	0.089	0.067	0.073	0.089	0.1	0.067	0.094	0.116	0.222	0.108	0.137	0.067	0.12	0.096	0.083	0.066	0.115	0.069	0.07	0.142	0.076	0.146	0.22	0.155	0.141	0.166	0.169	0.083	0.075	0.067	0.072	0.146	0.121	0.183	0.122	0.149	0.108	0.129	0.081	0.13	0.144	0.069
	1 day, 23:39:37	33.6	0.153	0.144	0.141	0.153	0.136	0.149	0.129	0.139	0.141	0.15	0.153	0.137	0.153	0.185	0.201	0.16	0.145	0.155	0.147	0.156	0.139	0.153	0.133	0.125	0.158	0.199	0.25	0.166	0.213	0.082	0.193	0.197	0.17	0.057	0.123	0.124	0.164	0.216	0.246	0.225	0.178	0.147	0.147	0.18	0.173	0.132	0.119
	2 days, 23:59:27	26.9	0.116	0.113	0.108	0.107	0.101	0.114	0.109	0.101	0.102	0.104	0.104	0.113	0.113	0.113	0.113	0.11	0.1	0.097	0.095	0.103	0.101	0.099	0.095	0.095	0.128	0.114	0.141	0.123	0.133	0.096	0.146	0.12	0.132	0.061	0.099	0.093	0.122	0.121	0.184	0.208	0.259	0.252	0.176	0.157	0.177	0.104	0.093
	3 days, 23:49:43	26.8	0.127	0.146	0.136	0.314	0.138	0.128	0.12	0.138	0.125	0.142	0.13	0.119	0.12	0.133	0.136	0.156	0.195	0.163	0.139	0.178	0.185	0.147	0.141	0.168	0.119	0.122	0.119	0.134	0.171	0.144	0.156	0.154	0.269	0.085	0.161	0.159	0.147	0.149	0.126	0.218	0.249	0.155	0.163	0.145	0.275	0.615	0.166
	4 days, 23:52:57	26.8	0.089	0.107	0.086	0.36	0.092	0.09	0.087	0.085	0.081	0.081	0.094	0.13	0.083	0.081	0.084	0.083	0.083	0.08	0.075	0.085	0.093	0.091	0.092	0.092	0.089	0.094	0.092	0.086	0.087	0.079	0.079	0.091	0.129	0.083	0.094	0.091	0.088	0.088	0.086	0.085	0.089	0.092	0.085	0.099	0.099	0.598	0.101
	5 days, 23:56:46	26.9	0.087	0.078	0.097	0.425	0.107	0.09	0.107	0.106	0.081	0.098	0.107	0.093	0.084	0.092	0.084	0.095	0.094	0.092	0.09	0.078	0.09	0.09	0.089	0.095	0.089	0.089	0.096	0.099	0.092	0.092	0.097	0.104	0.095	0.097	0.087	0.089	0.093	0.093	0.098	0.101	0.102	0.1	0.096	0.099	0.1	0.668	0.095
	7 days, 0:05:17	27	0.111	0.115	0.138	0.525	0.175	0.158	0.166	0.167	0.151	0.145	0.101	0.109	0.122	0.158	0.145	0.158	0.148	0.153	0.154	0.127	0.141	0.157	0.131	0.114	0.137	0.154	0.149	0.302	0.162	0.161	0.154	0.314	0.151	0.126	0.146	0.125	0.135	0.127	0.152	0.156	0.169	0.149	0.162	0.146	0.144	0.788	0.137
	8 days, 0:06:15	26.9	0.097	0.085	0.09	0.5	0.103	0.097	0.107	0.101	0.091	0.086	0.091	0.092	0.093	0.092	0.133	0.092	0.093	0.096	0.098	0.081	0.095	0.096	0.087	0.089	0.099	0.093	0.097	0.161	0.097	0.101	0.123	0.191	0.098	0.1	0.101	0.088	0.108	0.099	0.1	0.102	0.104	0.108	0.111	0.105	0.108	0.733	0.134
	8 days, 23:19:52	27.4	0.088	0.069	0.073	0.522	0.094	0.079	0.104	0.097	0.08	0.071	0.093	0.075	0.089	0.091	0.149	0.092	0.082	0.092	0.095	0.074	0.091	0.169	0.077	0.082	0.093	0.077	0.118	0.251	0.087	0.089	0.544	0.249	0.101	0.103	0.107	0.077	0.094	0.096	0.09	0.089	0.094	0.099	0.095	0.103	0.113	0.718	0.148
	10 days, 0:03:04	27.1	0.093	0.086	0.088	0.528	0.099	0.085	0.137	0.084	0.086	0.087	0.086	0.091	0.088	0.097	0.187	0.101	0.097	0.089	0.101	0.081	0.093	0.236	0.088	0.088	0.093	0.105	0.102	0.185	0.103	0.1	0.735	0.365	0.097	0.111	0.207	0.099	0.098	0.088	0.091	0.095	0.116	0.104	0.101	0.107	0.162	0.787	0.195
	10 days, 23:48:15	27	0.082	0.083	0.123	0.613	0.093	0.077	0.167	0.073	0.071	0.075	0.083	0.099	0.077	0.089	0.219	0.089	0.134	0.082	0.076	0.078	0.084	0.685	0.076	0.082	0.095	0.1	0.102	0.182	0.094	0.117	0.779	0.544	0.089	0.083	0.245	0.082	0.093	0.1	0.086	0.097	0.16	0.095	0.107	0.093	0.174	0.834	0.616
	00:00:00
	00:00:00
	00:00:00
	00:00:00
	00:00:00
	00:00:00
	00:00:00
	00:00:00
	00:00:00
	00:00:00
	00:00:00
Read 2:515,545
	Time	T° Read 2:515,545	A1	A2	A3	A4	A5	A6	A7	A8	A9	A10	A11	A12	B1	B2	B3	B4	B5	B6	B7	B8	B9	B10	B11	B12	C1	C2	C3	C4	C5	C6	C7	C8	C9	C10	C11	C12	D1	D2	D3	D4	D5	D6	D7	D8	D9	D10	D11
	00:00:03	33.6	282	229	210	203	234	260	234	276	258	230	196	159	312	181	197	245	175	243	303	203	264	168	251	260	191	329	276	203	261	276	326	299	278	167	242	223	359	168	235	210	243	164	340	240	276	167	146
	23:45:02	27.2	227	261	255	210	195	204	170	162	213	270	317	201	197	219	199	281	194	227	263	229	190	204	314	233	204	207	216	205	234	233	214	236	246	226	142	258	236	232	251	197	184	272	218	250	190	168	289
	1 day, 23:39:29	33.6	263	188	255	143	199	144	220	132	204	196	258	219	285	220	326	251	236	267	219	325	115	166	261	227	233	233	235	225	308	218	226	131	202	225	227	225	189	154	216	255	213	228	176	206	218	199	149
	2 days, 23:59:19	26.9	218	206	192	236	204	232	206	287	241	247	125	159	253	248	179	246	163	254	261	211	172	257	197	184	266	249	239	175	237	250	116	118	236	200	262	235	233	221	281	261	272	217	343	235	232	199	206
	3 days, 23:49:35	26.8	206	299	210	733	257	235	212	208	150	190	194	218	292	215	207	267	201	289	181	202	271	248	249	261	280	222	317	241	235	197	255	266	316	144	219	210	268	150	268	234	253	368	293	241	239	2694	258
	4 days, 23:52:50	26.8	226	261	193	1793	195	244	343	224	188	323	216	272	297	223	227	175	257	297	273	228	238	320	169	202	235	226	256	261	231	238	242	255	238	299	252	219	181	134	261	225	186	279	214	278	208	3479	287
	5 days, 23:56:38	26.9	202	282	271	2339	198	249	233	264	267	339	223	207	188	238	248	301	318	290	269	223	244	266	255	277	133	331	241	201	261	285	236	237	271	249	260	231	161	190	286	102	159	213	262	248	277	3906	212
	7 days, 0:05:09	27	296	249	255	3044	201	198	208	283	222	231	257	258	318	144	282	232	232	220	272	251	245	263	242	199	263	297	225	555	284	206	158	1061	218	188	253	260	219	244	221	319	210	251	269	279	241	4746	205
	8 days, 0:06:08	26.9	253	270	242	3143	255	319	250	176	159	257	200	242	250	213	456	280	191	305	238	255	201	272	210	251	217	233	242	922	232	267	317	1041	206	195	159	262	218	219	215	303	324	359	232	192	248	4043	331
	8 days, 23:19:44	27.4	249	219	221	3172	286	251	160	295	223	279	161	266	310	209	767	227	323	219	350	193	288	434	303	249	193	212	248	882	325	162	2295	1418	243	175	411	301	265	212	173	326	216	180	186	177	250	4260	510
	10 days, 0:02:56	27.1	269	208	220	3578	204	309	464	224	245	212	248	220	247	229	861	226	293	227	197	267	278	1019	241	173	256	190	216	1015	254	157	4018	2155	187	224	1207	376	225	287	320	332	191	163	203	267	597	4403	504
	10 days, 23:48:08	27	239	198	266	3905	284	238	832	201	301	224	268	181	176	240	1201	238	930	256	251	295	245	2210	250	366	265	243	215	996	244	452	4223	3327	227	137	1904	324	175	282	221	184	440	337	303	233	826	3501	858
	00:00:00
	00:00:00
	00:00:00
	00:00:00
	00:00:00
	00:00:00
	00:00:00
	00:00:00
	00:00:00
	00:00:00
	00:00:00
Read 2:515,545[2]
	Time	T° Read 2:515,545[2]	A1	A2	A3	A4	A5	A6	A7	A8	A9	A10	A11	A12	B1	B2	B3	B4	B5	B6	B7	B8	B9	B10	B11	B12	C1	C2	C3	C4	C5	C6	C7	C8	C9	C10	C11	C12	D1	D2	D3	D4	D5	D6	D7	D8	D9	D10	D11
	00:00:15	33.6	955	844	621	1235	958	1172	882	1107	1150	576	1135	757	945	906	1144	557	972	935	1012	980	853	1030	978	1032	1206	1132	811	922	982	926	1056	1129	848	886	967	927	1136	1212	1205	656	1003	915	1067	844	973	1082	998
	23:45:14	27.2	600	652	939	875	952	1001	1076	988	1088	972	917	822	1196	991	856	780	772	1106	795	948	846	715	979	900	974	736	784	1053	787	976	1218	1091	807	982	926	709	815	655	1070	690	780	952	905	951	844	942	1006
	1 day, 23:39:41	33.6	1029	863	791	946	945	1025	944	843	1020	988	1184	784	815	982	897	1098	767	872	1086	863	913	1016	976	748	923	1184	984	923	645	874	1217	1036	855	816	678	808	907	915	1189	911	763	1004	809	1067	1022	1025	1001
	2 days, 23:59:31	26.9	1015	771	860	792	763	1037	894	993	838	896	950	934	1109	788	943	1074	870	886	851	924	883	715	863	1115	1194	790	1083	1132	1051	896	863	860	621	891	670	880	1103	1037	1115	1218	1285	1101	828	839	1061	1146	780
	3 days, 23:49:47	26.8	1098	1109	1030	3249	875	1006	849	696	984	637	589	796	1085	1175	928	1025	1162	973	826	1105	1151	963	864	856	721	984	1091	826	1132	1172	1026	1195	1244	1022	979	907	886	793	961	1223	846	1110	983	868	1103	11372	1086
	4 days, 23:53:02	26.8	1018	869	812	7999	1074	994	1167	880	1211	1067	840	930	1152	895	1025	819	919	750	1386	965	1262	1060	1096	874	908	1080	1092	957	825	1079	1009	1027	1067	1119	1212	1196	746	853	1210	1207	1200	962	895	1087	918	13137	1153
	5 days, 23:56:50	26.9	779	926	950	10967	816	771	722	1066	990	1065	1075	1087	806	1136	502	991	1033	894	883	959	963	1140	1109	968	1053	1101	925	1276	1049	1282	936	1218	976	1112	878	980	975	1213	987	1127	998	1124	1189	888	796	15563	907
	7 days, 0:05:21	27	963	1127	926	13634	955	779	915	1105	867	825	1048	901	970	979	908	982	1005	1083	751	860	950	800	826	1133	1071	1202	987	2044	1152	898	1021	4070	798	844	804	761	872	1144	1175	1024	1089	1245	1207	1039	1246	17767	912
	8 days, 0:06:20	26.9	1019	938	813	11194	777	941	1048	1238	1105	767	1025	812	910	993	1898	993	1153	1120	920	853	1275	1109	704	1082	822	968	1204	3332	950	871	1400	4272	1057	884	1073	767	974	1100	1020	1061	1129	1159	1178	901	1145	16858	1095
	8 days, 23:19:56	27.4	1028	945	1344	12603	1104	1107	1145	994	644	919	888	1222	1072	1217	3195	939	1188	870	859	1126	895	1800	702	1127	1122	972	1035	3719	952	989	8957	5563	766	794	1533	903	1052	986	971	877	1273	1183	819	1200	1002	16107	1834
	10 days, 0:03:08	27.1	1001	886	1030	12497	990	868	1637	722	876	906	1050	1068	1106	964	3680	1052	1281	962	1039	1063	769	3675	944	1215	972	926	827	3933	842	1173	15706	9610	881	1012	5556	1043	872	710	1251	983	1069	1067	983	1129	2851	19385	2148
	10 days, 23:48:20	27	984	1113	1616	14923	1345	971	3229	1137	937	1156	1123	1270	1175	1191	4983	983	3157	886	858	1210	878	8265	574	1032	1102	1125	839	4467	1180	1571	18072	12829	966	1052	6888	1218	1246	918	914	856	1171	1075	1194	946	3086	15037	2663
	00:00:00
	00:00:00
	00:00:00
	00:00:00
	00:00:00
	00:00:00
	00:00:00
	00:00:00
	00:00:00
	00:00:00
	00:00:00
Read 3:425,475
	Time	T° Read 3:425,475	A1	A2	A3	A4	A5	A6	A7	A8	A9	A10	A11	A12	B1	B2	B3	B4	B5	B6	B7	B8	B9	B10	B11	B12	C1	C2	C3	C4	C5	C6	C7	C8	C9	C10	C11	C12	D1	D2	D3	D4	D5	D6	D7	D8	D9	D10	D11
	00:00:03	33.6	9785	7885	7907	8702	9011	10359	9555	9300	8533	8478	8433	8844	12272	10667	9465	9034	8721	9282	9462	9215	9520	8043	8407	7845	14322	13143	13003	11631	11319	11308	10151	10860	9763	9000	8160	8836	13749	14081	14314	13371	14272	13750	12866	10828	10551	8863	7755
	23:45:01	27.2	7207	6716	6664	6868	5929	6269	5881	5970	7088	7079	5810	7126	6420	8277	6508	7273	5809	6918	7049	6152	5786	7612	5980	6014	8799	5860	6956	9074	7660	7900	7964	7672	5432	5210	5337	5956	8105	7171	8393	6949	7440	6280	7113	5758	6641	7217	5342
	1 day, 23:39:29	33.5	8447	7836	7427	8298	7308	7615	7765	7545	7731	7427	7976	4872	8707	9326	7861	7299	7363	7658	7078	7300	7495	7441	7797	8079	9457	10310	9745	7581	8147	6878	7707	7313	7435	5090	7179	7512	8836	9350	8291	7597	7213	7154	7045	7342	7603	6741	7078
	2 days, 23:59:19	26.9	7720	8091	7616	7944	8075	7762	7857	7728	7740	7765	8311	5199	9221	9057	9120	8501	9004	7657	7644	8265	7405	6978	7741	7926	10378	9355	10069	8388	9417	6934	8810	7593	7473	5442	7219	7676	9569	11352	12465	12203	10171	8968	7851	8049	7868	17618	6895
	3 days, 23:49:35	26.8	7878	9801	7718	OVRFLW	5896	5875	6176	6183	5468	5583	5539	4227	8162	8033	7749	8377	9935	7783	8023	11150	8008	7681	8396	8448	7999	7677	8047	8489	9932	8545	8279	8238	8731	6760	8297	8606	8704	8817	8031	8555	9431	8709	7946	7803	8617	OVRFLW	8001
	4 days, 23:52:50	26.8	7532	7903	7566	OVRFLW	7226	7620	7235	7290	7426	7328	7769	6559	7374	7400	7204	7334	7175	7292	7663	9841	7724	8048	8091	9111	7325	7371	7362	7747	7079	7415	7387	7410	7938	6700	7542	8295	7467	7146	6982	7483	7769	7327	7038	7883	7503	OVRFLW	7867
	5 days, 23:56:38	27	7616	6909	6912	OVRFLW	7360	6884	7326	7382	6942	7501	7408	7636	7458	7433	6749	7144	7228	7139	7194	9223	7591	7960	7188	8760	7186	7429	6805	7908	6353	6541	6191	14056	7106	6951	6716	8185	7072	7212	7004	6951	6989	6896	7411	7300	7254	OVRFLW	7917
	7 days, 0:05:09	27	7166	7947	7433	OVRFLW	7706	7522	7248	7820	7853	7857	7600	8012	7732	7741	9050	7735	8308	8044	8122	9188	7471	8166	7811	8428	8684	7863	7466	55086	7773	8184	8568	92945	7912	7195	7603	8263	8153	7988	7593	8226	7802	7681	7974	7634	8649	OVRFLW	7280
	8 days, 0:06:08	27	7857	7474	8298	OVRFLW	8328	8237	8870	8681	8248	8495	8716	9107	8175	8057	51391	8005	8177	8408	8094	10214	8517	9196	8936	9935	8502	7689	7671	75229	7521	8354	22565	OVRFLW	8538	8534	8258	9304	7903	8240	7878	8416	7744	8479	8544	8547	9081	OVRFLW	11146
	8 days, 23:19:44	27.4	6944	7264	7712	OVRFLW	8256	8272	10859	8115	8445	8273	8508	10117	8270	8222	91315	8452	8943	8708	8585	10183	9046	53731	8948	10096	8257	7658	8314	OVRFLW	7777	8093	OVRFLW	OVRFLW	8507	8151	27588	9819	8650	8178	7889	8577	8869	8419	8866	8791	13743	OVRFLW	17765
	10 days, 0:02:56	27.1	7791	7801	8166	OVRFLW	8966	7753	43054	7936	7393	7995	7876	8024	7578	8787	OVRFLW	8163	16594	8114	8388	10265	7954	OVRFLW	8105	9772	8136	8209	7989	OVRFLW	7774	10357	OVRFLW	OVRFLW	8343	8062	OVRFLW	8754	8577	7754	7776	8350	8360	8109	8470	7949	59372	OVRFLW	22243
	10 days, 23:48:08	27	7592	7870	31800	OVRFLW	12882	7225	89761	7710	7748	7848	8096	8822	7937	10137	OVRFLW	7585	98273	7376	7335	10268	8783	OVRFLW	8554	10399	8092	7990	7495	OVRFLW	7541	24748	OVRFLW	OVRFLW	8001	7969	OVRFLW	9392	8065	7957	7293	7804	39860	8087	11937	7936	90919	OVRFLW	46854
	00:00:00
	00:00:00
	00:00:00
	00:00:00
	00:00:00
	00:00:00
	00:00:00
	00:00:00
	00:00:00
	00:00:00
	00:00:00
Read 3:425,475[2]
	Time	T° Read 3:425,475[2]	A1	A2	A3	A4	A5	A6	A7	A8	A9	A10	A11	A12	B1	B2	B3	B4	B5	B6	B7	B8	B9	B10	B11	B12	C1	C2	C3	C4	C5	C6	C7	C8	C9	C10	C11	C12	D1	D2	D3	D4	D5	D6	D7	D8	D9	D10	D11
	00:00:15	33.6	239	188	154	184	242	291	225	256	221	197	193	214	238	280	251	248	255	216	223	206	228	177	166	169	344	341	288	300	275	249	244	266	228	229	229	200	320	334	346	351	393	370	339	210	236	211	206
	23:45:13	27.2	134	204	129	158	193	193	182	168	159	119	70	167	181	224	141	178	103	170	171	186	145	160	125	158	152	105	178	229	225	179	178	206	129	123	138	166	229	171	246	208	182	133	127	118	146	155	117
	1 day, 23:39:41	33.5	225	230	144	156	170	180	185	210	154	184	194	140	221	224	154	240	204	159	168	153	226	164	138	198	228	261	263	193	158	196	163	178	227	87	182	165	228	168	210	179	193	191	169	192	205	225	189
	2 days, 23:59:31	26.9	227	200	196	234	151	206	231	179	200	147	163	150	266	200	197	237	211	161	199	159	170	168	225	191	278	227	295	174	210	201	166	248	192	181	184	206	195	275	305	312	230	278	137	189	234	401	120
	3 days, 23:49:47	26.8	200	253	193	2915	151	140	112	161	151	169	174	107	206	200	147	166	202	137	151	205	204	203	222	224	247	227	225	243	275	199	216	226	179	128	195	192	257	238	217	213	189	154	187	175	203	6890	169
	4 days, 23:53:02	26.8	162	218	178	5860	223	149	222	134	218	152	171	183	186	155	204	196	219	154	148	248	161	189	239	196	110	137	150	262	177	138	171	200	214	196	194	181	208	148	215	207	132	210	159	159	178	9770	220
	5 days, 23:56:50	27	205	130	122	7187	202	195	145	156	226	198	173	246	115	180	162	175	201	144	210	169	211	209	155	240	177	141	155	194	188	154	150	372	152	129	216	245	172	113	211	207	233	146	133	149	139	11379	137
	7 days, 0:05:21	27	190	199	161	9061	185	207	161	198	239	163	144	200	146	189	212	212	213	158	200	237	192	219	219	175	220	151	239	1381	151	244	157	2276	195	148	200	168	199	189	188	148	159	228	129	218	227	12895	201
	8 days, 0:06:20	27	243	141	150	10263	163	219	215	187	223	204	167	240	217	146	1278	221	175	261	162	255	211	220	286	262	161	168	210	1830	152	193	598	3140	211	160	193	188	235	162	202	195	199	183	259	183	255	13395	283
	8 days, 23:19:56	27.4	219	188	163	10367	146	237	274	205	187	240	226	293	182	203	2415	262	196	242	212	279	181	1355	220	292	188	205	184	2903	227	166	7491	3935	166	225	588	217	171	236	191	178	248	216	166	206	353	13091	397
	10 days, 0:03:08	27.1	174	173	205	10212	176	133	1046	185	204	218	214	226	219	232	2716	213	438	214	216	236	202	2834	248	251	143	215	220	3019	195	300	10853	6073	228	255	3713	214	223	198	226	250	193	199	200	176	1482	14429	553
	10 days, 23:48:20	27	162	192	832	11508	345	126	2145	156	168	178	153	204	240	261	2926	184	2138	153	163	214	196	7132	195	244	155	201	218	2584	243	651	12918	9006	235	140	5231	202	153	179	160	168	986	226	328	249	2211	13736	1137
	00:00:00
	00:00:00
	00:00:00
	00:00:00
	00:00:00
	00:00:00
	00:00:00
	00:00:00
	00:00:00
	00:00:00
	00:00:00
Ratio yfp od
	Time	A1	A2	A3	A4	A5	A6	A7	A8	A9	A10	A11	A12	B1	B2	B3	B4	B5	B6	B7	B8	B9	B10	B11	B12	C1	C2	C3	C4	C5	C6	C7	C8	C9	C10	C11	C12	D1	D2	D3	D4	D5	D6	D7	D8	D9	D10	D11	D12
	00:00:03	1753.73	1635.71	1437.37	1301.28	1552.75	1643.49	1452.51	1827.82	1856.12	1809.6	1397.01	1145.53	1815.01	971.551	1148.69	1436.95	1005.17	1287.76	1665.75	1116.61	1498.3	1240.77	1918.96	2124.18	1005.79	1784.16	1294.56	803.96	995.423	1116.05	1404.57	1173.01	1206.07	951.567	1656.4	1707.5	2115.5	855.833	919.405	631.01	712.192	470.588	1047.12	736.422	952.381	721.694	1133.54	2459.02
	23:45:02	2043.2	3179.05	2927.67	2203.57	2954.55	2292.14	2529.76	2228.34	2398.65	2708.12	4759.76	2147.44	1695.35	987.376	1842.59	2051.09	2917.29	1891.67	2739.58	2762.36	2887.54	1775.46	4550.73	3319.09	1435.61	2720.11	1482.5	932.666	1508.7	1653.65	1289.93	1399.76	2960.29	2993.38	2119.4	3583.33	1613.12	1912.61	1374.59	1612.11	1234.07	2525.53	1696.5	3105.59	1463.79	1162.63	4194.48	2507.51
	1 day, 23:39:29	1720.08	1301.94	1814.95	932.811	1466.47	968.393	1708.08	953.069	1448.86	1304.06	1685.17	1597.37	1862.74	1187.9	1621.89	1573.67	1628.71	1720.36	1488.78	2080.67	826.743	1087.1	1969.81	1823.29	1473.75	1170.27	938.498	1355.42	1443.98	2674.85	1172.81	666.328	1191.04	3919.86	1847.03	1814.52	1150.34	714.286	877.692	1134.85	1195.29	1549.97	1196.46	1145.72	1259.39	1513.31	1252.1	2754.78
	2 days, 23:59:19	1880.93	1823.01	1776.13	2201.49	2023.81	2040.46	1888.18	2835.97	2353.52	2370.44	1198.47	1413.33	2234.98	2202.49	1579.88	2242.48	1626.75	2615.86	2750.26	2038.65	1709.74	2601.22	2084.66	1932.77	2081.38	2189.97	1693.83	1423.92	1777.94	2604.17	792.891	980.881	1789.23	3294.89	2657.2	2537.8	1917.69	1824.94	1525.52	1253.6	1051.82	862.823	1952.19	1501.6	1312.22	1911.62	2217.44	2270.74
	3 days, 23:49:35	1627.17	2050.75	1545.25	2333.65	1858.28	1840.25	1769.62	1511.63	1203.85	1335.21	1493.46	1835.02	2425.25	1620.2	1527.67	1711.54	1033.42	1776.28	1299.35	1132.92	1465.66	1682.5	1772.24	1554.5	2348.99	1821.16	2670.6	1805.24	1375.07	1366.16	1632.52	1725.03	1176.91	1700.12	1358.56	1319.92	1820.65	1004.02	2126.98	1075.86	1017.29	2369.61	1797.55	1665.52	869.091	4381.91	1553.28	1387.76
	4 days, 23:52:50	2525.14	2450.7	2257.31	4986.1	2121.87	2711.11	3942.53	2644.63	2335.4	3987.65	2307.69	2092.31	3582.63	2770.19	2692.76	2098.32	3085.23	3721.8	3615.89	2685.51	2550.91	3508.77	1844.98	2202.84	2640.45	2414.53	2773.56	3017.34	2658.23	3001.26	3047.86	2786.89	1847.83	3589.44	2675.16	2393.44	2052.15	1526.2	3017.34	2643.95	2080.54	3029.32	2532.54	2808.08	2107.4	5822.59	2844.4	2141.33
	5 days, 23:56:38	2327.19	3596.94	2790.94	5500.94	1847.02	2763.6	2183.69	2495.27	3296.3	3448.63	2082.17	2233.01	2246.12	2586.96	2948.87	3165.09	3397.44	3165.94	2985.57	2851.66	2702.1	2955.56	2852.35	2925.03	1494.38	3719.1	2507.8	2024.17	2821.62	3107.96	2430.48	2276.66	2849.63	2580.31	2974.83	2607.22	1731.18	2040.82	2918.37	1007.9	1563.42	2127.87	2740.59	2494.97	2767.23	5848.18	2226.89	1591.88
	7 days, 0:05:09	2661.87	2157.71	1845.15	5792.58	1148.57	1253.16	1253.01	1691.57	1466.31	1587.63	2554.67	2369.15	2604.42	911.97	1943.49	1464.65	1566.51	1434.16	1762.8	1976.38	1742.53	1673.03	1845.92	1751.76	1919.71	1926.07	1506.02	1838.36	1749.85	1283.49	1027.98	3383.29	1444.66	1495.62	1731.69	2073.36	1628.25	1918.24	1453.95	2044.87	1240.4	1689.1	1658.45	1904.44	1671.29	6025.14	1498.54	1586.42
	8 days, 0:06:08	2613.64	3169.01	2700.89	6287.26	2463.77	3285.27	2340.82	1746.03	1739.61	2995.34	2185.79	2639.04	2685.28	2307.69	3420.86	3030.3	2055.97	3187.04	2423.62	3152.04	2124.74	2845.19	2422.14	2810.75	2183.1	2510.78	2505.18	5733.83	2401.66	2656.72	2575.14	5438.87	2095.63	1957.83	1568.05	2963.8	2011.07	2207.66	2141.43	2973.5	3115.39	3317.93	2088.21	1825.1	2287.82	5516.44	2468.31	2344.9
	8 days, 23:19:44	2826.33	3164.74	3010.9	6070.81	3029.66	3189.33	1544.4	3050.67	2777.09	3935.12	1723.77	3565.68	3475.34	2284.15	5154.57	2475.46	3943.83	2383.03	3668.76	2601.08	3147.54	2571.09	3909.68	3025.52	2077.5	2739.02	2098.14	3513.94	3718.53	1812.08	4219.53	5701.65	2408.32	1705.65	3837.53	3888.89	2825.16	2206.03	1922.22	3654.71	2297.87	1814.52	1949.69	1710.14	2218.28	5933.15	3434.34	2864.98
	10 days, 0:02:56	2898.71	2410.2	2485.88	6771.39	2056.45	3652.48	3381.92	2669.84	2862.15	2439.59	2897.2	2417.58	2813.21	2363.26	4596.9	2228.8	3029.99	2544.84	1950.49	3312.66	2998.92	4323.29	2723.16	1961.45	2761.6	1807.8	2117.65	5498.38	2461.24	1577.89	5465.18	5897.65	1925.85	2014.39	5833.74	3794.15	2305.33	3265.07	3524.23	3513.23	1647.97	1565.8	2019.9	2488.35	3678.37	5596.09	2579.32	3488.59
	10 days, 23:48:08	2918.19	2385.54	2155.59	6375.51	3063.65	3103	4979.05	2742.16	4263.46	2990.65	3213.43	1837.56	2297.65	2681.56	5489.03	2677.16	6945.48	3133.41	3315.72	3801.55	2902.84	3227.69	3289.47	4457.98	2804.23	2442.21	2105.78	5469.52	2606.84	3879.83	5423.14	6116.93	2556.31	1646.63	7784.14	3975.46	1887.81	2822.82	2557.87	1906.74	2751.72	3566.14	2837.08	2510.78	4738.96	4198.85	1393.08	7137.52
	00:00:00	?????	?????	?????	?????	?????	?????	?????	?????	?????	?????	?????	?????	?????	?????	?????	?????	?????	?????	?????	?????	?????	?????	?????	?????	?????	?????	?????	?????	?????	?????	?????	?????	?????	?????	?????	?????	?????	?????	?????	?????	?????	?????	?????	?????	?????	?????	?????	?????
	00:00:00	?????	?????	?????	?????	?????	?????	?????	?????	?????	?????	?????	?????	?????	?????	?????	?????	?????	?????	?????	?????	?????	?????	?????	?????	?????	?????	?????	?????	?????	?????	?????	?????	?????	?????	?????	?????	?????	?????	?????	?????	?????	?????	?????	?????	?????	?????	?????	?????
	00:00:00	?????	?????	?????	?????	?????	?????	?????	?????	?????	?????	?????	?????	?????	?????	?????	?????	?????	?????	?????	?????	?????	?????	?????	?????	?????	?????	?????	?????	?????	?????	?????	?????	?????	?????	?????	?????	?????	?????	?????	?????	?????	?????	?????	?????	?????	?????	?????	?????
	00:00:00	?????	?????	?????	?????	?????	?????	?????	?????	?????	?????	?????	?????	?????	?????	?????	?????	?????	?????	?????	?????	?????	?????	?????	?????	?????	?????	?????	?????	?????	?????	?????	?????	?????	?????	?????	?????	?????	?????	?????	?????	?????	?????	?????	?????	?????	?????	?????	?????
	00:00:00	?????	?????	?????	?????	?????	?????	?????	?????	?????	?????	?????	?????	?????	?????	?????	?????	?????	?????	?????	?????	?????	?????	?????	?????	?????	?????	?????	?????	?????	?????	?????	?????	?????	?????	?????	?????	?????	?????	?????	?????	?????	?????	?????	?????	?????	?????	?????	?????
	00:00:00	?????	?????	?????	?????	?????	?????	?????	?????	?????	?????	?????	?????	?????	?????	?????	?????	?????	?????	?????	?????	?????	?????	?????	?????	?????	?????	?????	?????	?????	?????	?????	?????	?????	?????	?????	?????	?????	?????	?????	?????	?????	?????	?????	?????	?????	?????	?????	?????
	00:00:00	?????	?????	?????	?????	?????	?????	?????	?????	?????	?????	?????	?????	?????	?????	?????	?????	?????	?????	?????	?????	?????	?????	?????	?????	?????	?????	?????	?????	?????	?????	?????	?????	?????	?????	?????	?????	?????	?????	?????	?????	?????	?????	?????	?????	?????	?????	?????	?????
	00:00:00	?????	?????	?????	?????	?????	?????	?????	?????	?????	?????	?????	?????	?????	?????	?????	?????	?????	?????	?????	?????	?????	?????	?????	?????	?????	?????	?????	?????	?????	?????	?????	?????	?????	?????	?????	?????	?????	?????	?????	?????	?????	?????	?????	?????	?????	?????	?????	?????
	00:00:00	?????	?????	?????	?????	?????	?????	?????	?????	?????	?????	?????	?????	?????	?????	?????	?????	?????	?????	?????	?????	?????	?????	?????	?????	?????	?????	?????	?????	?????	?????	?????	?????	?????	?????	?????	?????	?????	?????	?????	?????	?????	?????	?????	?????	?????	?????	?????	?????
	00:00:00	?????	?????	?????	?????	?????	?????	?????	?????	?????	?????	?????	?????	?????	?????	?????	?????	?????	?????	?????	?????	?????	?????	?????	?????	?????	?????	?????	?????	?????	?????	?????	?????	?????	?????	?????	?????	?????	?????	?????	?????	?????	?????	?????	?????	?????	?????	?????	?????
	00:00:00	?????	?????	?????	?????	?????	?????	?????	?????	?????	?????	?????	?????	?????	?????	?????	?????	?????	?????	?????	?????	?????	?????	?????	?????	?????	?????	?????	?????	?????	?????	?????	?????	?????	?????	?????	?????	?????	?????	?????	?????	?????	?????	?????	?????	?????	?????	?????	?????
Ratio cfp od
	Time	A1	A2	A3	A4	A5	A6	A7	A8	A9	A10	A11	A12	B1	B2	B3	B4	B5	B6	B7	B8	B9	B10	B11	B12	C1	C2	C3	C4	C5	C6	C7	C8	C9	C10	C11	C12	D1	D2	D3	D4	D5	D6	D7	D8	D9	D10	D11	D12
	00:00:03	60852	56321.4	54120.5	55782.1	59794.3	65480.4	59311	61589.4	61388.5	66703.4	60106.9	63717.6	71390.3	57257.1	55189.5	52985.3	50091.9	49189.2	52017.6	50687.6	54029.5	59401.8	64273.7	64093.1	75418.6	71274.4	60989.7	46063.4	43169.3	45725.8	43735.5	42604.9	42355.7	51282.1	55852.2	67657	81019.4	71732	56001.6	40177.3	41828.8	39454.8	39624.3	33224.9	36407.9	38301.6	60209.6	62240.4
	23:45:01	64869.5	81802.7	76509.8	72067.2	89833.3	70438.2	87514.9	82118.3	79819.8	71003	87237.2	76132.5	55249.6	37317.4	60259.3	53087.6	87353.4	57650	73427.1	74209.9	87933.1	66248.9	86666.7	85669.5	61921.2	77003.9	47741.9	41283	49387.5	56068.1	48004.8	45504.2	65367	69006.6	79656.7	82722.2	55399.9	59117.9	45963.9	56865.8	49899.4	58310.1	55354.1	71527.9	51163.3	49944.6	77532.7	88198.2
	1 day, 23:39:29	55245.3	54265.9	52861.2	54129.2	53854.1	51210.5	60287.3	54476.5	54907.7	49414.5	52096.7	35536.1	56908.5	50356.4	39109.5	45761.8	50814.4	49342.8	48116.9	46735	53882.1	48729.5	58845.3	64891.6	59816.6	51783	38917.7	45668.7	38195	84392.6	39994.8	37197.4	43838.4	88676	58413.3	60580.6	53779.7	43367.3	33689.6	33809.5	40477	48633.6	47892.6	40834.3	43922.6	51262.4	59479	59864.7
	2 days, 23:59:19	66609.1	71601.8	70453.3	74104.5	80109.1	68267.4	72016.5	76363.6	75585.9	74520.2	79683.6	46213.3	81457.6	80435.2	80494.3	77493.2	89860.3	78856.8	80547.9	79855.1	73608.4	70627.5	81915.3	83256.3	81205	82277.9	71360.7	68250.6	70645.2	72229.2	60218.7	63117.2	56656.6	89654	73215	82894.2	78757.2	93740.7	67671	58611.9	39331	35658.1	44684.1	51431.3	44502.3	169241	74219.6	82849.3
	3 days, 23:49:35	62227.5	67222.2	56791.8	?????	42632	46006.3	51552.6	44934.6	43884.4	39234	42640.5	35580.8	67790.7	60535	57188.2	53698.7	51079.7	47836.5	57595.1	62535.1	43309.9	52109.9	59758	50315.7	67105.7	62977.9	67792.8	63588	58115.9	59258	53002.6	53424.1	32517.7	79811.1	51470.2	54091.8	59130.4	59016.1	63738.1	39333.3	37921.2	56078.6	48748.5	53925.4	31334.5	?????	48169.8	48058.3
	4 days, 23:52:50	84156.4	74206.6	88491.2	?????	78628.9	84666.7	83160.9	86068.5	92248.4	90469.1	83002.1	50453.8	88950.5	91925.5	85456.7	87937.6	86134.5	91378.4	101497	115913	82786.7	88245.6	88329.7	99356.6	82303.4	78750	79761.6	89560.7	81461.4	93505.7	93035.3	80983.6	61630.4	80432.2	80063.7	90655.7	84659.9	81389.5	80716.8	87931.8	86901.6	79554.8	83289.9	79626.3	76018.2	?????	77968.3	81349
	5 days, 23:56:38	87741.9	88125	71184.3	?????	68656.7	76404	68659.8	69773.2	85703.7	76307.2	69169	82373.2	89103.9	80793.5	80249.7	75120.9	77222.2	77936.7	79844.6	117941	84064.2	88444.4	80402.7	92502.6	80741.6	83471.9	70811.7	79637.5	68681.1	71330.4	63759	135024	74721.3	72031.1	76842.1	92381.5	76043	77465.1	71469.4	68685.8	68721.7	68891.1	77520.9	73440.6	72467.5	?????	83161.8	87275.6
	7 days, 0:05:09	64442.4	68864.8	53784.4	?????	44034.3	47607.6	43662.7	46742.4	51869.2	54000	75546.7	73572.1	63325.1	49024.7	62370.8	48832.1	56097.2	52438.1	52637.7	72346.5	53136.6	51946.6	59580.5	74190.1	63386.9	50992.2	49973.2	182464	47892.8	50990.7	55745	296381	52432.1	57239.5	52039.7	65893.1	60617.1	62798.7	49953.9	52730.8	46083.9	51689.1	49161.5	52109.2	59979.2	?????	53216.4	62849.2
	8 days, 0:06:08	81167.4	87723	92611.6	?????	80463.8	84830.1	83052.4	86121	90240.7	99009.3	95256.8	99313	87808.8	87291.4	385529	86634.2	88019.4	87857.9	82423.6	126255	90031.7	96192.5	103068	111254	85533.2	82855.6	79409.9	467842	77857.1	83124.4	183306	?????	86856.6	85682.7	81439.8	105249	72905.9	83064.5	78466.1	82590.8	74461.5	78364.1	76903.7	81245.2	83773.1	?????	83117.1	97171.4
	8 days, 23:19:44	78819.5	104971	105068	?????	87457.6	105108	104817	83919.3	105168	116685	91092.1	135617	92713	89857.9	613676	92170.1	109194	94755.2	89989.5	137237	98863.4	318312	115458	122673	88880.5	98940.6	70338.4	?????	88981.7	90525.7	?????	?????	84311.2	79444.4	257591	126860	92217.5	85098.9	87655.6	96154.7	94351.1	84869	92935	84937.2	121943	?????	119630	112097
	10 days, 0:02:56	83954.7	90394	92271.2	?????	90383.1	91643	313805	94588.8	86366.8	92002.3	92009.3	88175.8	86309.8	90681.1	?????	80503	171603	90964.1	83049.5	127357	85803.7	?????	91581.9	110794	87767	78106.6	78323.5	?????	75329.5	104090	?????	?????	85921.7	72500	?????	88335	87879.1	88213.9	85638.8	88359.8	72131.1	77896.3	84278.6	74082	365816	?????	113833	314068
	10 days, 23:48:08	92698.4	94819.3	257699	?????	138964	94198.2	537169	105184	109745	104780	97074.3	89563.5	103616	113263	?????	85320.6	733928	90281.5	96895.6	132320	104064	?????	112553	126663	85629.6	80301.5	73408.4	?????	80566.2	212429	?????	?????	90101.4	95781.2	?????	115239	87001.1	79649.6	84409.7	80870.5	249281	85576.7	111770	85517.2	521624	?????	76074	?????
	00:00:00	?????	?????	?????	?????	?????	?????	?????	?????	?????	?????	?????	?????	?????	?????	?????	?????	?????	?????	?????	?????	?????	?????	?????	?????	?????	?????	?????	?????	?????	?????	?????	?????	?????	?????	?????	?????	?????	?????	?????	?????	?????	?????	?????	?????	?????	?????	?????	?????
	00:00:00	?????	?????	?????	?????	?????	?????	?????	?????	?????	?????	?????	?????	?????	?????	?????	?????	?????	?????	?????	?????	?????	?????	?????	?????	?????	?????	?????	?????	?????	?????	?????	?????	?????	?????	?????	?????	?????	?????	?????	?????	?????	?????	?????	?????	?????	?????	?????	?????
	00:00:00	?????	?????	?????	?????	?????	?????	?????	?????	?????	?????	?????	?????	?????	?????	?????	?????	?????	?????	?????	?????	?????	?????	?????	?????	?????	?????	?????	?????	?????	?????	?????	?????	?????	?????	?????	?????	?????	?????	?????	?????	?????	?????	?????	?????	?????	?????	?????	?????
	00:00:00	?????	?????	?????	?????	?????	?????	?????	?????	?????	?????	?????	?????	?????	?????	?????	?????	?????	?????	?????	?????	?????	?????	?????	?????	?????	?????	?????	?????	?????	?????	?????	?????	?????	?????	?????	?????	?????	?????	?????	?????	?????	?????	?????	?????	?????	?????	?????	?????
	00:00:00	?????	?????	?????	?????	?????	?????	?????	?????	?????	?????	?????	?????	?????	?????	?????	?????	?????	?????	?????	?????	?????	?????	?????	?????	?????	?????	?????	?????	?????	?????	?????	?????	?????	?????	?????	?????	?????	?????	?????	?????	?????	?????	?????	?????	?????	?????	?????	?????
	00:00:00	?????	?????	?????	?????	?????	?????	?????	?????	?????	?????	?????	?????	?????	?????	?????	?????	?????	?????	?????	?????	?????	?????	?????	?????	?????	?????	?????	?????	?????	?????	?????	?????	?????	?????	?????	?????	?????	?????	?????	?????	?????	?????	?????	?????	?????	?????	?????	?????
	00:00:00	?????	?????	?????	?????	?????	?????	?????	?????	?????	?????	?????	?????	?????	?????	?????	?????	?????	?????	?????	?????	?????	?????	?????	?????	?????	?????	?????	?????	?????	?????	?????	?????	?????	?????	?????	?????	?????	?????	?????	?????	?????	?????	?????	?????	?????	?????	?????	?????
	00:00:00	?????	?????	?????	?????	?????	?????	?????	?????	?????	?????	?????	?????	?????	?????	?????	?????	?????	?????	?????	?????	?????	?????	?????	?????	?????	?????	?????	?????	?????	?????	?????	?????	?????	?????	?????	?????	?????	?????	?????	?????	?????	?????	?????	?????	?????	?????	?????	?????
	00:00:00	?????	?????	?????	?????	?????	?????	?????	?????	?????	?????	?????	?????	?????	?????	?????	?????	?????	?????	?????	?????	?????	?????	?????	?????	?????	?????	?????	?????	?????	?????	?????	?????	?????	?????	?????	?????	?????	?????	?????	?????	?????	?????	?????	?????	?????	?????	?????	?????
	00:00:00	?????	?????	?????	?????	?????	?????	?????	?????	?????	?????	?????	?????	?????	?????	?????	?????	?????	?????	?????	?????	?????	?????	?????	?????	?????	?????	?????	?????	?????	?????	?????	?????	?????	?????	?????	?????	?????	?????	?????	?????	?????	?????	?????	?????	?????	?????	?????	?????
	00:00:00	?????	?????	?????	?????	?????	?????	?????	?????	?????	?????	?????	?????	?????	?????	?????	?????	?????	?????	?????	?????	?????	?????	?????	?????	?????	?????	?????	?????	?????	?????	?????	?????	?????	?????	?????	?????	?????	?????	?????	?????	?????	?????	?????	?????	?????	?????	?????	?????
Ratio yfp cfp
	Time	A1	A2	A3	A4	A5	A6	A7	A8	A9	A10	A11	A12	B1	B2	B3	B4	B5	B6	B7	B8	B9	B10	B11	B12	C1	C2	C3	C4	C5	C6	C7	C8	C9	C10	C11	C12	D1	D2	D3	D4	D5	D6	D7	D8	D9	D10	D11	D12
	00:00:15	3.996	4.489	4.032	6.712	3.959	4.027	3.92	4.324	5.204	2.924	5.881	3.537	3.971	3.236	4.558	2.246	3.812	4.329	4.538	4.757	3.741	5.819	5.892	6.107	3.506	3.32	2.816	3.073	3.571	3.719	4.328	4.244	3.719	3.869	4.223	4.635	3.55	3.629	3.483	1.869	2.552	2.473	3.147	4.019	4.123	5.128	4.845	5.388
	23:45:14	4.478	3.196	7.279	5.538	4.933	5.187	5.912	5.881	6.843	8.168	13.1	4.922	6.608	4.424	6.071	4.382	7.495	6.506	4.649	5.097	5.834	4.469	7.832	5.696	6.408	7.01	4.404	4.598	3.498	5.453	6.843	5.296	6.256	7.984	6.71	4.271	3.559	3.83	4.35	3.317	4.286	7.158	7.126	8.059	5.781	6.077	8.598	4.771
	1 day, 23:39:41	4.573	3.752	5.493	6.064	5.559	5.694	5.103	4.014	6.623	5.37	6.103	5.6	3.688	4.384	5.825	4.575	3.76	5.484	6.464	5.641	4.04	6.195	7.072	3.778	4.048	4.536	3.741	4.782	4.082	4.459	7.466	5.82	3.767	9.379	3.725	4.897	3.978	5.446	5.662	5.089	3.953	5.257	4.787	5.557	4.985	4.556	5.296	4.982
	2 days, 23:59:31	4.471	3.855	4.388	3.385	5.053	5.034	3.87	5.547	4.19	6.095	5.828	6.227	4.169	3.94	4.787	4.532	4.123	5.503	4.276	5.811	5.194	4.256	3.836	5.838	4.295	3.48	3.671	6.506	5.005	4.458	5.199	3.468	3.234	4.923	3.641	4.272	5.656	3.771	3.656	3.904	5.587	3.96	6.044	4.439	4.534	2.858	6.5	3.52
	3 days, 23:49:47	5.49	4.383	5.337	1.115	5.795	7.186	7.58	4.323	6.517	3.769	3.385	7.439	5.267	5.875	6.313	6.175	5.752	7.102	5.47	5.39	5.642	4.744	3.892	3.821	2.919	4.335	4.849	3.399	4.116	5.889	4.75	5.288	6.95	7.984	5.021	4.724	3.447	3.332	4.429	5.742	4.476	7.208	5.257	4.96	5.433	1.651	6.426	5.531
	4 days, 23:53:02	6.284	3.986	4.562	1.365	4.816	6.671	5.257	6.567	5.555	7.02	4.912	5.082	6.194	5.774	5.025	4.179	4.196	4.87	9.365	3.891	7.839	5.608	4.586	4.459	8.255	7.883	7.28	3.653	4.661	7.819	5.901	5.135	4.986	5.709	6.247	6.608	3.587	5.764	5.628	5.831	9.091	4.581	5.629	6.836	5.157	1.345	5.241	5.756
	5 days, 23:56:50	3.8	7.123	7.787	1.526	4.04	3.954	4.979	6.833	4.381	5.379	6.214	4.419	7.009	6.311	3.099	5.663	5.139	6.208	4.205	5.675	4.564	5.455	7.155	4.033	5.949	7.809	5.968	6.577	5.58	8.325	6.24	3.274	6.421	8.62	4.065	4	5.669	10.735	4.678	5.444	4.283	7.699	8.94	5.96	5.727	1.368	6.62	3.192
	7 days, 0:05:21	5.068	5.663	5.752	1.505	5.162	3.763	5.683	5.581	3.628	5.061	7.278	4.505	6.644	5.18	4.283	4.632	4.718	6.854	3.755	3.629	4.948	3.653	3.772	6.474	4.868	7.96	4.13	1.48	7.629	3.68	6.503	1.788	4.092	5.703	4.02	4.53	4.382	6.053	6.25	6.919	6.849	5.461	9.357	4.766	5.489	1.378	4.537	4.552
	8 days, 0:06:20	4.193	6.652	5.42	1.091	4.767	4.297	4.874	6.62	4.955	3.76	6.138	3.383	4.194	6.801	1.485	4.493	6.589	4.291	5.679	3.345	6.043	5.041	2.462	4.13	5.106	5.762	5.733	1.821	6.25	4.513	2.341	1.361	5.009	5.525	5.56	4.08	4.145	6.79	5.05	5.441	5.673	6.333	4.548	4.923	4.49	1.259	3.869	3.971
	8 days, 23:19:56	4.694	5.027	8.245	1.216	7.562	4.671	4.179	4.849	3.444	3.829	3.929	4.171	5.89	5.995	1.323	3.584	6.061	3.595	4.052	4.036	4.945	1.328	3.191	3.86	5.968	4.741	5.625	1.281	4.194	5.958	1.196	1.414	4.614	3.529	2.607	4.161	6.152	4.178	5.084	4.927	5.133	5.477	4.934	5.825	2.839	1.23	4.62	4.862
	10 days, 0:03:08	5.753	5.121	5.024	1.224	5.625	6.526	1.565	3.903	4.294	4.156	4.907	4.726	5.05	4.155	1.355	4.939	2.925	4.495	4.81	4.504	3.807	1.297	3.806	4.841	6.797	4.307	3.759	1.303	4.318	3.91	1.447	1.582	3.864	3.969	1.496	4.874	3.91	3.586	5.535	3.932	5.539	5.362	4.915	6.415	1.924	1.343	3.884	2.314
	10 days, 23:48:20	6.074	5.797	1.942	1.297	3.899	7.706	1.505	7.288	5.577	6.494	7.34	6.225	4.896	4.563	1.703	5.342	1.477	5.791	5.264	5.654	4.48	1.159	2.944	4.23	7.11	5.597	3.849	1.729	4.856	2.413	1.399	1.424	4.111	7.514	1.317	6.03	8.144	5.128	5.713	5.095	1.188	4.757	3.64	3.799	1.396	1.095	2.342	1.623
	00:00:00	?????	?????	?????	?????	?????	?????	?????	?????	?????	?????	?????	?????	?????	?????	?????	?????	?????	?????	?????	?????	?????	?????	?????	?????	?????	?????	?????	?????	?????	?????	?????	?????	?????	?????	?????	?????	?????	?????	?????	?????	?????	?????	?????	?????	?????	?????	?????	?????
	00:00:00	?????	?????	?????	?????	?????	?????	?????	?????	?????	?????	?????	?????	?????	?????	?????	?????	?????	?????	?????	?????	?????	?????	?????	?????	?????	?????	?????	?????	?????	?????	?????	?????	?????	?????	?????	?????	?????	?????	?????	?????	?????	?????	?????	?????	?????	?????	?????	?????
	00:00:00	?????	?????	?????	?????	?????	?????	?????	?????	?????	?????	?????	?????	?????	?????	?????	?????	?????	?????	?????	?????	?????	?????	?????	?????	?????	?????	?????	?????	?????	?????	?????	?????	?????	?????	?????	?????	?????	?????	?????	?????	?????	?????	?????	?????	?????	?????	?????	?????
	00:00:00	?????	?????	?????	?????	?????	?????	?????	?????	?????	?????	?????	?????	?????	?????	?????	?????	?????	?????	?????	?????	?????	?????	?????	?????	?????	?????	?????	?????	?????	?????	?????	?????	?????	?????	?????	?????	?????	?????	?????	?????	?????	?????	?????	?????	?????	?????	?????	?????
	00:00:00	?????	?????	?????	?????	?????	?????	?????	?????	?????	?????	?????	?????	?????	?????	?????	?????	?????	?????	?????	?????	?????	?????	?????	?????	?????	?????	?????	?????	?????	?????	?????	?????	?????	?????	?????	?????	?????	?????	?????	?????	?????	?????	?????	?????	?????	?????	?????	?????
	00:00:00	?????	?????	?????	?????	?????	?????	?????	?????	?????	?????	?????	?????	?????	?????	?????	?????	?????	?????	?????	?????	?????	?????	?????	?????	?????	?????	?????	?????	?????	?????	?????	?????	?????	?????	?????	?????	?????	?????	?????	?????	?????	?????	?????	?????	?????	?????	?????	?????
	00:00:00	?????	?????	?????	?????	?????	?????	?????	?????	?????	?????	?????	?????	?????	?????	?????	?????	?????	?????	?????	?????	?????	?????	?????	?????	?????	?????	?????	?????	?????	?????	?????	?????	?????	?????	?????	?????	?????	?????	?????	?????	?????	?????	?????	?????	?????	?????	?????	?????
	00:00:00	?????	?????	?????	?????	?????	?????	?????	?????	?????	?????	?????	?????	?????	?????	?????	?????	?????	?????	?????	?????	?????	?????	?????	?????	?????	?????	?????	?????	?????	?????	?????	?????	?????	?????	?????	?????	?????	?????	?????	?????	?????	?????	?????	?????	?????	?????	?????	?????
	00:00:00	?????	?????	?????	?????	?????	?????	?????	?????	?????	?????	?????	?????	?????	?????	?????	?????	?????	?????	?????	?????	?????	?????	?????	?????	?????	?????	?????	?????	?????	?????	?????	?????	?????	?????	?????	?????	?????	?????	?????	?????	?????	?????	?????	?????	?????	?????	?????	?????
	00:00:00	?????	?????	?????	?????	?????	?????	?????	?????	?????	?????	?????	?????	?????	?????	?????	?????	?????	?????	?????	?????	?????	?????	?????	?????	?????	?????	?????	?????	?????	?????	?????	?????	?????	?????	?????	?????	?????	?????	?????	?????	?????	?????	?????	?????	?????	?????	?????	?????
	00:00:00	?????	?????	?????	?????	?????	?????	?????	?????	?????	?????	?????	?????	?????	?????	?????	?????	?????	?????	?????	?????	?????	?????	?????	?????	?????	?????	?????	?????	?????	?????	?????	?????	?????	?????	?????	?????	?????	?????	?????	?????	?????	?????	?????	?????	?????	?????	?????	?????
Ratio cfp2 od
	Time	A1	A2	A3	A4	A5	A6	A7	A8	A9	A10	A11	A12	B1	B2	B3	B4	B5	B6	B7	B8	B9	B10	B11	B12	C1	C2	C3	C4	C5	C6	C7	C8	C9	C10	C11	C12	D1	D2	D3	D4	D5	D6	D7	D8	D9	D10	D11	D12
	00:00:15	1486.32	1342.86	1054.07	1179.49	1605.84	1839.44	1396.65	1695.36	1589.93	1549.96	1375.62	1541.79	1384.53	1502.95	1463.56	1454.55	1464.67	1144.67	1225.95	1133.11	1293.98	1307.24	1269.11	1380.72	1811.48	1849.24	1350.84	1188.12	1048.82	1006.87	1051.27	1043.55	989.154	1304.84	1567.42	1531.39	1885.68	1701.48	1353.68	1054.69	1151.82	1061.69	1044.04	644.369	814.355	911.841	1599.38	1327.09
	23:45:13	1206.12	2484.78	1481.06	1657.92	2924.24	2168.54	2708.33	2310.87	1790.54	1193.58	1051.05	1784.19	1557.66	1009.92	1305.56	1299.27	1548.87	1416.67	1781.25	2243.67	2203.65	1392.52	1811.59	2250.71	1069.67	1379.76	1221.69	1041.86	1450.68	1270.4	1072.94	1221.83	1552.35	1629.14	2059.7	2305.56	1565.28	1409.73	1347.21	1702.13	1220.66	1234.91	988.327	1465.84	1124.81	1072.66	1698.11	2552.55
	1 day, 23:39:41	1471.55	1592.8	1024.91	1017.61	1252.76	1210.49	1436.34	1516.24	1093.75	1224.22	1267.15	1021.15	1444.44	1209.5	766.169	1504.7	1407.87	1024.48	1142.08	979.513	1624.73	1074	1041.51	1590.36	1442.12	1310.9	1050.32	1162.65	740.741	2404.91	845.874	905.392	1338.44	1515.68	1480.88	1330.64	1387.7	779.221	853.312	796.618	1083.05	1298.44	1148.88	1067.85	1184.29	1711.03	1588.23	1751.59
	2 days, 23:59:31	1958.59	1769.91	1813.14	2182.84	1498.02	1811.79	2117.32	1768.78	1953.12	1410.75	1562.8	1333.33	2349.82	1776.2	1738.75	2160.44	2105.79	1658.08	2096.94	1536.23	1689.86	1700.4	2380.95	2006.3	2175.27	1996.48	2090.72	1415.79	1575.39	2093.75	1134.65	2061.51	1455.65	2981.88	1866.13	2224.62	1604.94	2270.85	1655.81	1498.56	889.404	1105.37	779.738	1207.67	1323.53	3852.07	1291.71	2183.41
	3 days, 23:49:47	1579.78	1735.25	1420.16	9280.48	1091.83	1096.32	934.891	1170.06	1211.88	1187.63	1339.49	900.673	1710.96	1507.16	1084.87	1064.1	1038.56	842.041	1083.99	1149.75	1103.3	1377.2	1580.07	1334.13	2072.15	1862.18	1895.54	1820.22	1609.13	1380.03	1382.84	1465.63	666.667	1511.22	1209.68	1206.79	1745.92	1593.04	1722.22	979.31	759.952	991.629	1147.24	1209.4	738.182	11206.9	1017.46	857.143
	4 days, 23:53:02	1810.06	2046.95	2081.87	16295.9	2426.55	1655.56	2551.72	1582.05	2708.07	1876.54	1826.92	1407.69	2243.67	1925.47	2419.93	2350.12	2629.05	1929.83	1960.27	2921.08	1725.62	2072.37	2609.17	2137.41	1235.95	1463.67	1625.13	3028.9	2036.82	1740.23	2153.65	2185.79	1661.49	2352.94	2059.45	1978.14	2358.28	1685.65	2485.55	2432.43	1476.51	2280.13	1881.66	1606.06	1803.44	16351.5	2180.38	1713.06
	5 days, 23:56:50	2361.75	1658.16	1256.44	16902.6	1884.33	2164.26	1358.95	1474.48	2790.12	2014.24	1615.31	2653.72	1373.95	1956.52	1926.28	1840.17	2147.44	1572.05	2330.74	2161.12	2336.66	2322.22	1733.78	2534.32	1988.76	1584.27	1612.9	1953.68	2032.43	1679.39	1544.8	3573.49	1598.32	1336.79	2471.4	2765.24	1849.46	1213.75	2153.06	2045.45	2291.05	1458.54	1391.21	1498.99	1388.61	17037	1439.08	2564.1
	7 days, 0:05:21	1708.63	1724.44	1164.98	17242.6	1057.14	1310.13	969.88	1183.5	1578.6	1120.28	1431.41	1836.55	1195.74	1196.96	1461.06	1338.38	1438.22	1029.99	1296.18	1866.14	1365.58	1393.13	1670.48	1540.49	1605.84	979.248	1599.73	4574.36	930.376	1520.25	1021.47	7257.65	1292.25	1177.41	1368.92	1339.71	1479.55	1485.85	1236.84	948.718	939.161	1534.32	795.314	1488.06	1574.2	16370.4	1469.3	1673.24
	8 days, 0:06:20	2510.33	1654.93	1674.11	20530.1	1574.88	2255.41	2013.11	1855.16	2439.82	2377.62	1825.14	2617.23	2330.83	1581.8	9587.4	2391.78	1883.75	2727.27	1649.69	3152.04	2230.44	2301.26	3298.73	2933.93	1619.72	1810.35	2173.91	11380.6	1573.5	1920.4	4857.84	16405.4	2146.49	1606.43	1903.35	2126.7	2167.9	1633.07	2011.95	1913.64	1913.46	1691.31	2331.23	1739.54	2352.4	18276.7	2110.36	2565.72
	8 days, 23:19:56	2485.81	2716.76	2220.71	19841.1	1546.61	3011.44	2644.79	2119.96	2328.77	3385.05	2419.7	3927.61	2040.36	2218.58	16229.8	2857.14	2393.16	2633.3	2222.22	3760.11	1978.14	8027.25	2838.71	3547.99	2023.68	2648.58	1556.68	11565.7	2597.25	1856.82	13772.8	15822.3	1645.19	2192.98	5490.2	2803.62	1823.03	2455.78	2122.22	1995.52	2638.3	2177.42	1740.04	1990.34	3132.21	18232.6	2673.4	2941.82
	10 days, 0:03:08	1875	2004.63	2316.38	19326.3	1774.19	1572.1	7623.91	2205.01	2383.18	2508.63	2500	2483.52	2494.3	2394.22	14500.8	2100.59	4529.47	2399.1	2138.61	2928.04	2179.07	12023.8	2802.26	2845.8	1542.61	2045.67	2156.86	16354.3	1889.54	3015.07	14762	16620.1	2348.09	2293.16	17945.9	2159.43	2284.84	2252.56	2488.99	2645.5	1665.23	1911.62	1990.05	1640.26	9131.24	18338.8	2830.09	7214.83
	10 days, 23:48:20	1978.02	2313.25	6742.3	18788.6	3721.68	1642.76	12836.6	2128.24	2379.6	2376.5	1834.53	2071.07	3133.16	2916.2	13372.9	2069.74	15967.1	1872.7	2153.24	2757.73	2322.28	10416.2	2565.79	2971.99	1640.21	2020.1	2135.16	14190	2596.15	5587.98	16589.2	16558.2	2646.4	1682.69	21385.9	2478.53	1650.48	1791.79	1851.85	1740.93	6166.35	2391.53	3071.16	2683.19	12685	16474	1846.08	18445.4
	00:00:00	?????	?????	?????	?????	?????	?????	?????	?????	?????	?????	?????	?????	?????	?????	?????	?????	?????	?????	?????	?????	?????	?????	?????	?????	?????	?????	?????	?????	?????	?????	?????	?????	?????	?????	?????	?????	?????	?????	?????	?????	?????	?????	?????	?????	?????	?????	?????	?????
	00:00:00	?????	?????	?????	?????	?????	?????	?????	?????	?????	?????	?????	?????	?????	?????	?????	?????	?????	?????	?????	?????	?????	?????	?????	?????	?????	?????	?????	?????	?????	?????	?????	?????	?????	?????	?????	?????	?????	?????	?????	?????	?????	?????	?????	?????	?????	?????	?????	?????
	00:00:00	?????	?????	?????	?????	?????	?????	?????	?????	?????	?????	?????	?????	?????	?????	?????	?????	?????	?????	?????	?????	?????	?????	?????	?????	?????	?????	?????	?????	?????	?????	?????	?????	?????	?????	?????	?????	?????	?????	?????	?????	?????	?????	?????	?????	?????	?????	?????	?????
	00:00:00	?????	?????	?????	?????	?????	?????	?????	?????	?????	?????	?????	?????	?????	?????	?????	?????	?????	?????	?????	?????	?????	?????	?????	?????	?????	?????	?????	?????	?????	?????	?????	?????	?????	?????	?????	?????	?????	?????	?????	?????	?????	?????	?????	?????	?????	?????	?????	?????
	00:00:00	?????	?????	?????	?????	?????	?????	?????	?????	?????	?????	?????	?????	?????	?????	?????	?????	?????	?????	?????	?????	?????	?????	?????	?????	?????	?????	?????	?????	?????	?????	?????	?????	?????	?????	?????	?????	?????	?????	?????	?????	?????	?????	?????	?????	?????	?????	?????	?????
	00:00:00	?????	?????	?????	?????	?????	?????	?????	?????	?????	?????	?????	?????	?????	?????	?????	?????	?????	?????	?????	?????	?????	?????	?????	?????	?????	?????	?????	?????	?????	?????	?????	?????	?????	?????	?????	?????	?????	?????	?????	?????	?????	?????	?????	?????	?????	?????	?????	?????
	00:00:00	?????	?????	?????	?????	?????	?????	?????	?????	?????	?????	?????	?????	?????	?????	?????	?????	?????	?????	?????	?????	?????	?????	?????	?????	?????	?????	?????	?????	?????	?????	?????	?????	?????	?????	?????	?????	?????	?????	?????	?????	?????	?????	?????	?????	?????	?????	?????	?????
	00:00:00	?????	?????	?????	?????	?????	?????	?????	?????	?????	?????	?????	?????	?????	?????	?????	?????	?????	?????	?????	?????	?????	?????	?????	?????	?????	?????	?????	?????	?????	?????	?????	?????	?????	?????	?????	?????	?????	?????	?????	?????	?????	?????	?????	?????	?????	?????	?????	?????
	00:00:00	?????	?????	?????	?????	?????	?????	?????	?????	?????	?????	?????	?????	?????	?????	?????	?????	?????	?????	?????	?????	?????	?????	?????	?????	?????	?????	?????	?????	?????	?????	?????	?????	?????	?????	?????	?????	?????	?????	?????	?????	?????	?????	?????	?????	?????	?????	?????	?????
	00:00:00	?????	?????	?????	?????	?????	?????	?????	?????	?????	?????	?????	?????	?????	?????	?????	?????	?????	?????	?????	?????	?????	?????	?????	?????	?????	?????	?????	?????	?????	?????	?????	?????	?????	?????	?????	?????	?????	?????	?????	?????	?????	?????	?????	?????	?????	?????	?????	?????
	00:00:00	?????	?????	?????	?????	?????	?????	?????	?????	?????	?????	?????	?????	?????	?????	?????	?????	?????	?????	?????	?????	?????	?????	?????	?????	?????	?????	?????	?????	?????	?????	?????	?????	?????	?????	?????	?????	?????	?????	?????	?????	?????	?????	?????	?????	?????	?????	?????	?????
[truncated: 49 more columns]

## Sheet: Plate 10 - mediumE_all
Software Version	2001-09-02
Experiment File Path:	C:\Users\Public\Documents\Experiments\Bella\20190512_EE24.12.xpt
Protocol File Path:	C:\Users\Public\Documents\Protocols\Bella\EE22.prt
Plate Number	Plate 10
Date	2019-05-01
Time	10:33:30
Reader Type:	Synergy H1
Reader Serial Number:	266878
Reading Type	Reader
Procedure Details
Plate Type	Nunc 96 flat bottom generic
Discontinuous Kinetics	Runtime 22:00:00 (D:HH:MM), Interval 1:00:00, 23 Reads
	Pause after each run
Eject plate on completion
Shake	Double Orbital: 0:10 (MM:SS)
	Frequency: 365 cpm (2 mm)
Read	Absorbance Endpoint
	Full Plate
	Wavelengths: 600
	Read Speed: Sweep, Delay: 0 msec, Measurements/Data Point: 1
Shake	Linear: 0:02 (MM:SS)
	Frequency: 731 cpm (2 mm)
Read	Fluorescence Endpoint
	Full Plate
	Filter Set 1
	Excitation: 515, Emission: 545
	Optics: Top, Gain: 100
	Filter Set 2
	Excitation: 515, Emission: 545
	Optics: Top, Gain: 120
	Light Source: Xenon Flash, Lamp Energy: High
	Read Speed: Sweep, Delay: 0 msec, Measurements/Data Point: 1
	Read Height: 7 mm
Shake	Linear: 0:02 (MM:SS)
	Frequency: 731 cpm (2 mm)
Read	Fluorescence Endpoint
	Full Plate
	Filter Set 1
	Excitation: 425, Emission: 475
	Optics: Top, Gain: 100
	Filter Set 2
	Excitation: 425, Emission: 475
	Optics: Top, Gain: 60
	Light Source: Xenon Flash, Lamp Energy: High
	Read Speed: Sweep, Delay: 0 msec, Measurements/Data Point: 1
	Read Height: 7 mm
Layout
		1	2	3	4	5	6	7	8	9	10	11	12
	A	SPL1	SPL5	SPL9	SPL13	SPL17	SPL21	SPL25	SPL29	SPL33	SPL37	SPL44	SPL51	Well ID
	B	SPL2	SPL6	SPL10	SPL14	SPL18	SPL22	SPL26	SPL30	SPL34	SPL38	SPL45	SPL52	Well ID
	C	SPL3	SPL7	SPL11	SPL15	SPL19	SPL23	SPL27	SPL31	SPL35	SPL39	SPL46	SPL53	Well ID
	D	SPL4	SPL8	SPL12	SPL16	SPL20	BLK	BLK	SPL32	SPL36	SPL40	SPL47	SPL54	Well ID
	E	SPL58	SPL62	SPL66	SPL70	SPL74	SPL78	SPL82	SPL86	SPL90	SPL41	SPL48	SPL55	Well ID
	F	SPL59	SPL63	SPL67	SPL71	SPL75	SPL79	SPL83	SPL87	SPL91	SPL42	SPL49	SPL56	Well ID
	G	SPL60	SPL64	SPL68	SPL72	SPL76	SPL80	SPL84	SPL88	SPL92	SPL43	SPL50	SPL57	Well ID
	H	SPL61	SPL65	SPL69	SPL73	SPL77	BLK	BLK	SPL89	SPL93	SPL94	SPL95	SPL1	Well ID
Read 1:600
	Time	T° Read 1:600	A1	A2	A3	A4	A5	A6	A7	A8	A9	A10	A11	A12	B1	B2	B3	B4	B5	B6	B7	B8	B9	B10	B11	B12	C1	C2	C3	C4	C5	C6	C7	C8	C9	C10	C11	C12	D1	D2	D3	D4	D5	D6	D7	D8	D9	D10	D11
	00:00:11	33.4	0.205	0.206	0.203	0.222	0.153	0.147	0.138	0.136	0.203	0.196	0.2	0.208	0.205	0.224	0.264	0.246	0.148	0.154	0.16	0.169	0.233	0.249	0.249	0.153	0.18	0.256	0.305	0.265	0.177	0.206	0.181	0.2	0.285	0.265	0.212	0.173	0.195	0.272	0.277	0.263	0.206	0.195	0.175	0.182	0.291	0.261	0.24
	23:45:06	27.2	0.215	0.226	0.206	0.214	0.205	0.195	0.18	0.201	0.205	0.197	0.199	0.18	0.233	0.274	0.265	0.263	0.203	0.205	0.199	0.2	0.212	0.2	0.154	0.155	0.206	0.288	0.343	0.356	0.179	0.239	0.226	0.225	0.312	0.265	0.196	0.152	0.217	0.333	0.364	0.331	0.234	0.26	0.253	0.216	0.295	0.261	0.166
	1 day, 23:39:45	33.4	0.153	0.185	0.168	0.19	0.105	0.109	0.114	0.103	0.135	0.174	0.17	0.224	0.186	0.132	0.142	0.155	0.102	0.112	0.109	0.111	0.117	0.154	0.141	0.194	0.116	0.142	0.157	0.127	0.117	0.089	0.122	0.122	0.133	0.148	0.165	0.186	0.155	0.144	0.163	0.142	0.131	0.121	0.127	0.13	0.121	0.12	0.147
	2 days, 23:59:40	26.9	0.102	0.101	0.08	0.082	0.077	0.095	0.08	0.079	0.079	0.086	0.094	0.105	0.093	0.091	0.109	0.101	0.081	0.083	0.086	0.086	0.093	0.1	0.095	0.097	0.096	0.089	0.096	0.094	0.082	0.085	0.088	0.093	0.1	0.096	0.097	0.098	0.09	0.094	0.127	0.087	0.096	0.089	0.098	0.097	0.095	0.095	0.097
	3 days, 23:49:46	26.8	0.107	0.105	0.095	0.102	0.116	0.101	0.095	0.098	0.089	0.092	0.076	0.101	0.091	0.104	0.097	0.097	0.096	0.105	0.102	0.096	0.089	0.1	0.086	0.083	0.095	0.105	0.103	0.103	0.101	0.095	0.092	0.1	0.09	0.087	0.094	0.084	0.095	0.094	0.109	0.108	0.102	0.099	0.094	0.09	0.09	0.09	0.087
	4 days, 23:52:55	26.8	0.108	0.104	0.101	0.1	0.104	0.095	0.094	0.097	0.099	0.085	0.103	0.096	0.105	0.106	0.09	0.102	0.101	0.108	0.098	0.096	0.097	0.092	0.088	0.094	0.106	0.127	0.103	0.099	0.109	0.103	0.097	0.098	0.104	0.097	0.098	0.092	0.09	0.092	0.118	0.117	0.113	0.105	0.111	0.107	0.101	0.101	0.089
	5 days, 23:56:43	26.9	0.112	0.105	0.107	0.105	0.103	0.101	0.103	0.105	0.101	0.103	0.107	0.129	0.109	0.109	0.113	0.114	0.114	0.11	0.106	0.104	0.102	0.104	0.112	0.112	0.12	0.124	0.131	0.144	0.152	0.143	0.141	0.131	0.113	0.116	0.117	0.104	0.12	0.114	0.143	0.157	0.158	0.166	0.158	0.155	0.138	0.121	0.114
	7 days, 0:05:16	27	0.364	0.318	0.328	0.212	0.113	0.22	0.186	0.081	0.084	0.108	0.099	0.078	0.073	0.155	0.15	0.105	0.099	0.083	0.105	0.084	0.077	0.073	0.071	0.068	0.163	0.213	0.181	0.16	0.146	0.123	0.125	0.091	0.078	0.08	0.077	0.067	0.164	0.138	0.161	0.133	0.096	0.114	0.11	0.088	0.085	0.084	0.078
	8 days, 0:06:11	26.9	0.118	0.12	0.108	0.116	0.125	0.115	0.113	0.11	0.113	0.115	0.114	0.127	0.121	0.112	0.101	0.114	0.12	0.117	0.114	0.114	0.107	0.111	0.11	0.106	0.12	0.119	0.113	0.116	0.123	0.117	0.117	0.119	0.117	0.114	0.105	0.106	0.124	0.124	0.135	0.14	0.131	0.131	0.131	0.129	0.117	0.11	0.102
	8 days, 23:19:47	27.4	0.083	0.078	0.084	0.086	0.088	0.08	0.083	0.087	0.084	0.085	0.087	0.089	0.095	0.102	0.09	0.095	0.084	0.085	0.1	0.102	0.094	0.093	0.09	0.082	0.111	0.13	0.091	0.085	0.101	0.11	0.095	0.095	0.091	0.09	0.082	0.087	0.096	0.095	0.095	0.088	0.106	0.094	0.098	0.109	0.092	0.087	0.077
	10 days, 0:03:02	27.1	0.199	0.185	0.164	0.15	0.146	0.13	0.129	0.12	0.12	0.122	0.115	0.108	0.258	0.198	0.152	0.143	0.118	0.122	0.114	0.112	0.108	0.11	0.103	0.1	0.257	0.254	0.187	0.185	0.198	0.149	0.155	0.147	0.13	0.134	0.124	0.11	0.232	0.184	0.201	0.173	0.174	0.144	0.137	0.15	0.145	0.135	0.123
	10 days, 23:48:20	26.9	0.103	0.091	0.089	0.079	0.088	0.08	0.086	0.084	0.082	0.084	0.1	0.122	0.106	0.09	0.089	0.085	0.088	0.086	0.097	0.089	0.079	0.084	0.083	0.075	0.091	0.097	0.095	0.09	0.094	0.082	0.088	0.091	0.09	0.09	0.085	0.081	0.089	0.092	0.092	0.092	0.094	0.097	0.089	0.091	0.089	0.083	0.087
	00:00:00
	00:00:00
	00:00:00
	00:00:00
	00:00:00
	00:00:00
	00:00:00
	00:00:00
	00:00:00
	00:00:00
	00:00:00
Read 2:515,545
	Time	T° Read 2:515,545	A1	A2	A3	A4	A5	A6	A7	A8	A9	A10	A11	A12	B1	B2	B3	B4	B5	B6	B7	B8	B9	B10	B11	B12	C1	C2	C3	C4	C5	C6	C7	C8	C9	C10	C11	C12	D1	D2	D3	D4	D5	D6	D7	D8	D9	D10	D11
	00:00:03	33.4	294	188	197	165	175	146	188	160	220	172	133	276	289	259	222	142	207	205	224	249	207	232	247	222	306	243	238	237	192	191	194	230	215	250	217	201	300	199	153	232	162	170	202	147	231	195	269
	23:44:58	27.2	253	273	263	228	174	188	156	188	202	237	230	197	245	168	225	271	128	168	191	225	191	140	271	132	304	264	296	254	166	214	197	254	266	243	210	160	320	239	239	158	178	132	98	177	203	300	211
	1 day, 23:39:37	33.3	272	220	187	225	184	198	206	183	203	251	184	160	259	230	194	301	196	161	174	149	287	170	182	255	230	201	211	226	182	177	159	123	212	245	249	208	206	226	166	232	190	200	190	139	202	122	238
	2 days, 23:59:32	26.9	181	160	189	236	243	226	171	167	211	202	206	162	162	130	201	151	228	203	237	176	189	189	168	161	254	248	269	213	198	155	264	144	162	163	276	173	204	136	196	202	196	211	140	134	222	208	229
	3 days, 23:49:38	26.8	196	219	286	225	193	138	189	248	206	188	215	178	237	211	174	294	157	130	186	120	180	269	259	208	211	301	239	220	211	195	156	245	170	209	196	228	172	265	252	231	210	133	162	114	241	248	126
	4 days, 23:52:48	26.8	143	235	313	196	213	216	184	231	278	138	256	254	184	198	125	198	253	219	119	261	212	279	150	174	245	218	259	143	205	138	101	279	192	127	208	239	178	276	158	252	166	176	219	224	200	135	283
	5 days, 23:56:36	26.9	237	223	161	288	145	186	122	211	137	192	218	201	198	242	177	314	197	233	143	216	197	241	201	229	208	218	231	270	202	182	155	217	225	277	169	197	236	206	286	213	155	249	90	202	255	247	296
	7 days, 0:05:09	27	235	145	294	248	240	240	121	161	227	156	255	197	188	249	271	208	123	186	275	135	244	193	169	275	173	183	193	233	217	288	208	229	199	187	204	229	201	217	170	214	180	190	185	183	140	251	184
	8 days, 0:06:03	26.9	232	255	214	173	188	235	129	171	214	247	208	291	243	238	269	273	113	129	228	178	187	196	306	169	196	270	187	188	228	154	182	230	193	233	195	210	239	218	202	273	219	153	214	161	166	177	274
	8 days, 23:19:39	27.4	191	134	158	231	114	308	104	232	215	217	136	304	214	218	246	228	240	163	196	203	183	197	267	224	255	184	301	253	166	207	237	207	336	329	186	216	173	258	155	228	201	142	203	225	234	187	176
	10 days, 0:02:54	27.1	223	211	160	201	189	171	169	220	224	199	202	215	249	350	133	165	178	318	200	208	219	229	235	212	302	203	255	229	213	277	131	140	233	225	171	102	276	218	290	198	157	225	241	222	167	191	182
	10 days, 23:48:12	26.9	220	202	243	267	163	200	180	181	251	222	217	141	148	177	267	246	179	261	190	167	184	194	212	194	234	223	298	232	161	180	166	224	202	303	188	201	211	164	164	178	197	245	157	156	162	232	250
	00:00:00
	00:00:00
	00:00:00
	00:00:00
	00:00:00
	00:00:00
	00:00:00
	00:00:00
	00:00:00
	00:00:00
	00:00:00
Read 2:515,545[2]
	Time	T° Read 2:515,545[2]	A1	A2	A3	A4	A5	A6	A7	A8	A9	A10	A11	A12	B1	B2	B3	B4	B5	B6	B7	B8	B9	B10	B11	B12	C1	C2	C3	C4	C5	C6	C7	C8	C9	C10	C11	C12	D1	D2	D3	D4	D5	D6	D7	D8	D9	D10	D11
	00:00:15	33.4	1037	721	928	829	657	851	1089	783	1023	1125	833	914	976	836	836	1091	871	905	1035	1083	988	801	982	687	883	1174	1027	1062	834	738	676	676	958	883	809	993	1251	905	1154	885	853	699	882	871	1308	844	1154
	23:45:10	27.2	1115	1076	874	1218	546	870	853	690	940	784	962	915	859	1057	833	806	748	716	844	681	709	748	883	724	1004	1245	844	989	714	707	855	653	1124	798	880	992	799	1060	1114	1048	565	1040	895	814	1010	833	1008
	1 day, 23:39:49	33.3	931	900	865	1036	851	684	617	920	722	1166	795	1000	937	1001	864	1143	682	967	654	892	701	934	705	801	890	1058	615	834	1018	635	747	882	885	1192	780	950	1111	728	1103	855	826	601	776	654	911	807	657
	2 days, 23:59:44	26.9	629	775	748	970	910	537	925	848	863	671	829	907	925	780	804	750	498	1041	569	495	841	671	755	1058	988	988	832	939	602	873	747	727	1036	809	973	988	722	826	620	827	747	885	570	743	865	813	786
	3 days, 23:49:50	26.8	962	688	828	901	792	723	733	1106	944	797	859	724	896	1142	695	930	725	672	645	593	645	888	549	856	604	1058	956	968	869	696	594	757	1169	735	856	848	723	643	705	843	825	621	903	754	925	1011	940
	4 days, 23:53:00	26.8	1017	748	886	935	894	871	490	845	703	1266	1054	893	731	828	833	870	1022	804	691	874	733	652	717	989	906	800	869	793	672	868	690	801	1018	1042	961	1118	954	1046	697	922	856	807	635	776	1110	956	897
	5 days, 23:56:48	26.9	971	743	1098	898	893	869	906	760	891	865	818	620	729	863	939	856	789	673	753	1017	778	681	795	1071	917	788	940	770	1041	812	536	822	1167	810	911	965	853	952	978	819	680	881	772	675	1014	971	421
	7 days, 0:05:21	27	963	763	1078	833	678	684	991	761	941	877	888	1058	880	1055	816	733	719	687	857	834	848	972	687	878	851	807	909	867	1105	1040	979	849	848	739	857	768	706	1018	839	937	752	583	665	666	854	1047	768
	8 days, 0:06:15	26.9	774	1005	834	999	933	716	837	852	948	921	1029	973	709	1331	1047	955	838	712	715	698	907	950	813	896	759	647	861	852	758	588	685	508	987	846	912	878	853	939	857	1061	862	844	819	674	853	915	1023
	8 days, 23:19:51	27.4	809	831	800	718	700	851	663	920	1206	874	909	882	907	733	751	759	889	693	829	520	1026	889	881	775	805	978	881	1107	774	524	713	581	1613	979	731	1007	1007	1247	808	1029	726	520	727	908	703	1023	884
	10 days, 0:03:06	27.1	1010	1033	854	972	753	840	588	889	843	893	766	861	969	652	688	901	849	670	586	735	1045	585	790	566	936	921	845	872	745	888	1002	685	1012	910	770	1020	975	1249	720	980	881	1010	632	581	1035	731	858
	10 days, 23:48:24	26.9	1127	942	835	983	538	717	900	751	1003	1025	879	1095	1096	603	900	1057	826	845	777	567	908	744	934	1063	1035	628	784	1315	751	848	757	986	928	927	779	978	818	1132	895	792	602	847	894	753	882	834	830
	00:00:00
	00:00:00
	00:00:00
	00:00:00
	00:00:00
	00:00:00
	00:00:00
	00:00:00
	00:00:00
	00:00:00
	00:00:00
Read 3:425,475
	Time	T° Read 3:425,475	A1	A2	A3	A4	A5	A6	A7	A8	A9	A10	A11	A12	B1	B2	B3	B4	B5	B6	B7	B8	B9	B10	B11	B12	C1	C2	C3	C4	C5	C6	C7	C8	C9	C10	C11	C12	D1	D2	D3	D4	D5	D6	D7	D8	D9	D10	D11
	00:00:03	33.3	9668	9246	8752	9486	7383	7148	6747	7631	8132	8420	8492	8089	10283	10589	9989	10385	7503	7970	7103	7791	8856	8403	8243	7414	10047	11232	10319	9876	6783	7651	7116	7822	8477	7999	7527	8015	9832	10065	7991	9450	7391	7460	6856	7540	8528	8000	8583
	23:44:58	27.2	9470	9586	8661	8222	8325	8532	8136	7836	7476	7516	7615	7351	11565	10881	10108	8875	8320	7412	8031	8162	7510	7778	6984	7549	11939	12125	10989	10473	8439	8911	8680	8371	8372	8498	7516	7274	11318	11340	10249	9104	8111	8397	8500	7597	8123	8093	7040
	1 day, 23:39:37	33.2	7807	7446	6824	7670	6746	6992	6860	6966	6464	7458	7056	8514	7494	7876	7198	6975	7261	6567	6852	6680	6517	6978	6774	8109	7308	7216	6787	6611	6920	6403	6313	6739	6633	7119	7432	7901	7160	7551	6983	6965	6899	6095	6838	7256	6580	6881	6900
	2 days, 23:59:32	26.9	6348	6432	5613	6033	6152	6796	6622	7389	6784	6390	7403	7694	6640	7111	6877	7504	6666	7083	7051	7155	7421	7450	7578	7922	6964	6639	6951	6056	6437	6455	6580	6960	7820	7257	6874	7784	7354	6873	7554	6842	7248	6726	6523	7195	6835	7220	7302
	3 days, 23:49:38	26.8	7148	7006	6843	7483	7540	7583	7540	7934	6949	7007	7127	7853	7425	7418	7726	7331	7941	8424	8243	7975	6796	7245	7515	7661	7600	8029	7668	7242	7494	7002	7516	7373	7307	6922	7263	7336	7755	7689	7550	8038	7634	7180	7922	7642	7941	6932	7430
	4 days, 23:52:47	26.8	6740	7022	6882	7006	7300	7571	7264	7699	7117	7135	7909	8311	6706	7389	6689	7240	7189	6983	7364	7516	7190	7294	7157	8403	7074	7531	6689	7132	7280	6761	7141	6707	7170	7169	7060	7988	5602	6169	6554	6884	6790	7157	7128	7217	7137	7155	7190
	5 days, 23:56:35	26.9	7010	7153	6452	6981	7301	7222	6666	7132	7023	7457	7970	8217	7501	7285	7094	7259	7083	7334	6864	7071	7573	6861	7670	7683	7972	7873	7113	7684	7407	7538	7153	7171	7355	7024	7107	7472	7676	7716	8052	8462	7997	7861	7782	7739	7070	7148	7226
	7 days, 0:05:08	27	8462	8171	10142	6833	5778	7307	6864	5583	5344	5238	5946	6154	5411	6336	6378	5877	5859	6024	5880	5429	6016	5204	5474	5688	6981	7112	6734	6531	6035	6491	6074	5755	5496	6013	5740	5463	6326	6104	6400	5717	5473	5484	5808	5546	5587	5410	5414
	8 days, 0:06:03	26.9	7199	6669	6994	7357	7249	7075	7357	7202	7147	7439	7575	7916	7335	6969	6479	7259	6868	7040	7045	7213	7258	7150	7192	8130	7669	6953	7287	7003	6791	7299	7134	7594	7447	7897	6919	8624	7404	7868	7191	7291	6892	7312	7269	7133	7813	7854	7444
	8 days, 23:19:39	27.4	6502	6305	5889	6897	7277	6908	6511	6674	7420	7032	7193	6986	6957	7178	7072	6829	6875	7500	7136	7307	7452	7298	7341	8254	7451	7225	6711	6538	6728	6631	6848	7001	11399	6594	6802	8293	6308	7360	7103	6591	7091	7386	7334	7167	7569	7809	7369
	10 days, 0:02:54	27.1	6678	7105	7673	6638	7113	7045	7172	7007	6965	6972	7064	7196	7889	7112	8215	7114	7089	7564	6789	6620	6780	6782	6967	7040	7719	7483	7878	6701	6951	7225	7206	6985	7712	7278	7532	7105	7016	7595	7698	7152	7171	7129	6833	6760	6930	7135	7164
	10 days, 23:48:12	26.9	7016	6801	6327	6469	6252	6263	6417	6465	7850	6729	7175	7431	6340	6660	8213	6653	6572	7658	6541	6721	6850	6481	7120	8101	6831	6795	6251	6430	6367	6423	6343	6416	6511	6286	6614	7294	6381	6840	6333	6286	6449	6762	7035	6571	6944	6335	7164
	00:00:00
	00:00:00
	00:00:00
	00:00:00
	00:00:00
	00:00:00
	00:00:00
	00:00:00
	00:00:00
	00:00:00
	00:00:00
Read 3:425,475[2]
	Time	T° Read 3:425,475[2]	A1	A2	A3	A4	A5	A6	A7	A8	A9	A10	A11	A12	B1	B2	B3	B4	B5	B6	B7	B8	B9	B10	B11	B12	C1	C2	C3	C4	C5	C6	C7	C8	C9	C10	C11	C12	D1	D2	D3	D4	D5	D6	D7	D8	D9	D10	D11
	00:00:15	33.3	255	210	186	290	203	160	175	175	210	247	164	219	294	255	195	265	187	149	200	137	236	160	247	147	210	254	255	203	199	171	188	204	210	171	138	226	256	216	207	206	218	153	213	208	225	180	210
	23:45:10	27.2	278	174	187	214	189	181	220	180	150	184	212	209	233	240	244	254	250	156	190	230	155	133	144	138	293	281	320	265	139	250	224	184	263	229	174	182	284	299	238	186	215	229	167	181	200	215	194
	1 day, 23:39:49	33.2	155	184	180	226	206	211	137	128	146	170	183	165	211	205	156	203	185	208	153	147	153	203	211	195	203	146	138	152	210	174	116	152	201	217	166	204	164	163	127	195	140	114	124	158	129	218	151
	2 days, 23:59:44	26.9	123	189	165	131	143	178	123	193	159	185	203	179	141	194	240	139	178	153	209	201	151	150	193	180	197	148	134	206	119	163	135	110	206	178	161	229	183	210	194	160	122	98	150	191	216	206	187
	3 days, 23:49:50	26.8	195	173	149	137	240	176	180	236	133	183	202	174	209	222	223	145	206	211	196	167	206	158	194	137	161	162	193	167	215	200	190	192	172	154	154	171	159	226	132	176	221	183	185	174	157	152	220
	4 days, 23:52:59	26.8	185	134	197	152	204	194	163	206	141	201	213	199	175	195	150	208	183	137	198	145	184	228	150	210	131	176	169	165	178	147	146	194	191	166	190	212	159	176	199	139	132	174	196	154	167	170	139
	5 days, 23:56:47	26.9	242	144	160	190	143	192	192	144	138	206	151	206	215	216	140	128	193	221	136	121	137	186	206	190	231	153	172	150	171	151	158	228	136	152	131	219	183	185	165	182	228	217	179	133	155	166	139
	7 days, 0:05:20	27	206	159	282	182	187	100	164	103	158	121	163	120	121	186	201	126	132	159	128	100	150	168	100	150	148	178	131	145	159	108	183	159	146	177	124	163	150	161	200	124	145	168	166	110	101	116	123
	8 days, 0:06:15	26.9	100	190	193	150	165	192	199	141	210	202	179	183	165	177	208	137	147	212	199	204	203	176	163	189	163	190	197	207	161	170	165	189	151	187	174	249	171	140	149	182	191	209	209	177	152	161	145
	8 days, 23:19:51	27.4	116	184	149	155	177	135	141	239	208	153	145	218	164	162	198	196	172	189	204	203	216	151	133	182	192	166	135	212	165	156	145	139	267	170	153	236	194	196	157	136	197	189	171	127	139	177	135
	10 days, 0:03:06	27.1	156	166	187	152	190	204	176	145	119	182	197	155	143	171	222	188	197	212	161	184	185	119	203	144	223	217	158	171	182	159	181	135	140	171	145	181	194	232	203	171	192	218	207	197	116	152	184
	10 days, 23:48:24	26.9	230	156	166	215	183	109	168	150	220	158	208	213	127	168	146	167	185	220	136	184	220	173	170	232	189	137	181	132	179	164	132	182	196	139	151	148	188	108	154	125	168	154	193	147	174	163	142
	00:00:00
	00:00:00
	00:00:00
	00:00:00
	00:00:00
	00:00:00
	00:00:00
	00:00:00
	00:00:00
	00:00:00
	00:00:00
Ratio yfp od
	Time	A1	A2	A3	A4	A5	A6	A7	A8	A9	A10	A11	A12	B1	B2	B3	B4	B5	B6	B7	B8	B9	B10	B11	B12	C1	C2	C3	C4	C5	C6	C7	C8	C9	C10	C11	C12	D1	D2	D3	D4	D5	D6	D7	D8	D9	D10	D11	D12
	00:00:03	1432.75	911.736	971.88	744.921	1143.79	995.907	1360.35	1174.74	1081.61	878.896	664.004	1323.74	1411.82	1158.32	842.505	577.941	1394.88	1332.03	1402.63	1471.63	888.031	933.602	993.564	1449.09	1696.23	948.108	779.817	893.665	1083.52	928.988	1073.6	1151.73	754.916	945.18	1023.1	1163.87	1536.88	731.618	551.749	883.81	787.172	871.795	1156.93	809.471	793.269	747.126	1122.24	1385.34
	23:44:58	1175.65	1206.9	1275.46	1066.42	849.609	964.597	865.225	933.929	986.328	1201.83	1157.52	1092.02	1053.76	613.811	850.662	1030.03	630.542	820.313	961.248	1122.75	900.943	699.301	1759.74	852.713	1473.58	915.713	863.981	714.085	926.339	896.899	871.296	1128.39	852.564	916.981	1070.34	1053.33	1476.7	718.797	655.693	477.486	760.034	508.083	388.119	818.308	688.369	1148.55	1268.03	1103.03
	1 day, 23:39:37	1782.44	1192.41	1115.09	1181.72	1745.73	1823.2	1810.19	1781.89	1499.26	1439.22	1083.63	713.967	1396.23	1738.47	1366.2	1938.18	1914.06	1432.38	1602.21	1343.55	2444.63	1103.9	1291.7	1313.08	1981.05	1417.49	1341.39	1773.94	1560.89	1977.65	1308.64	1006.55	1593.98	1649.83	1505.44	1120.69	1331.61	1570.54	1017.78	1628.07	1451.49	1650.16	1499.61	1071.7	1665.29	1018.36	1617.95	1099.33
	2 days, 23:59:32	1779.74	1584.16	2371.39	2881.56	3168.19	2376.45	2145.55	2113.92	2674.27	2335.26	2182.2	1550.24	1736.33	1434.88	1849.13	1490.62	2828.78	2457.63	2749.42	2034.68	2030.08	1895.69	1762.85	1658.08	2634.86	2770.95	2813.81	2268.37	2414.63	1834.32	2989.81	1548.39	1616.77	1694.39	2845.36	1770.73	2261.64	1442.21	1549.41	2313.86	2037.42	2362.82	1428.57	1387.16	2336.84	2196.41	2355.97	2025.05
	3 days, 23:49:38	1830.07	2095.69	2997.9	2199.41	1659.5	1362.29	1991.57	2530.61	2312.01	2052.4	2821.52	1760.63	2613.01	2036.68	1801.24	3034.06	1640.54	1244.02	1832.51	1256.55	2022.47	2700.8	2997.68	2509.05	2230.44	2872.14	2313.65	2135.92	2097.42	2052.63	1690.14	2450	1893.1	2407.83	2094.02	2701.42	1802.93	2816.15	2314.05	2132.96	2054.8	1340.73	1730.77	1265.26	2671.84	2755.56	1440	2230.94
	4 days, 23:52:48	1330.23	2261.79	3086.78	1956.09	2046.11	2283.3	1955.37	2374.1	2802.42	1621.62	2487.85	2643.08	1747.39	1866.16	1387.35	1950.74	2507.43	2029.66	1218.01	2715.92	2194.62	3042.53	1706.48	1843.22	2313.5	1716.54	2519.45	1440.08	1875.57	1343.72	1045.55	2841.14	1849.71	1309.28	2133.33	2595.01	1966.85	3006.54	1343.54	2144.68	1472.94	1674.6	1965.89	2103.29	1986.1	1340.62	3172.65	2245.34
	5 days, 23:56:36	2108.54	2117.76	1511.74	2750.72	1413.26	1837.94	1179.88	2003.8	1351.09	1869.52	2035.48	1564.2	1813.19	2216.12	1573.33	2747.16	1734.15	2123.97	1349.06	2078.92	1929.48	2319.54	1788.26	2039.18	1740.59	1755.23	1763.36	1872.4	1330.7	1269.18	1095.41	1653.96	1989.39	2383.82	1438.3	1899.71	1971.6	1803.85	1994.42	1356.69	983.503	1501.81	570.704	1305.75	1854.55	2043.01	2594.22	2399.23
	7 days, 0:05:09	645.073	456.549	897.162	1172.02	2120.14	1091.9	651.94	1990.11	2702.38	1449.81	2578.36	2538.66	2557.82	1609.57	1800.66	1988.53	1244.94	2230.22	2621.54	1609.06	3185.38	2651.1	2380.28	4056.05	1063.31	860.367	1066.3	1458.07	1490.38	2337.66	1668	2527.59	2554.56	2328.77	2656.25	3423.02	1227.86	1577.04	1054.59	1612.66	1880.88	1669.6	1684.88	2084.28	1641.27	2998.8	2371.13	1730.52
	8 days, 0:06:03	1962.78	2130.33	1985.16	1488.81	1508.83	2039.93	1145.65	1554.55	1888.79	2157.2	1826.16	2300.39	2004.95	2132.62	2655.48	2398.95	940.1	1099.74	1998.25	1561.4	1755.87	1773.76	2794.52	1589.84	1629.26	2263.2	1659.27	1626.3	1847.65	1316.24	1550.26	1934.4	1656.65	2051.06	1851.85	1979.27	1935.22	1762.33	1500.74	1945.83	1669.21	1164.38	1628.62	1250	1416.38	1610.56	2675.78	2545.63
	8 days, 23:19:39	2292.92	1717.95	1874.26	2695.45	1293.98	3874.21	1253.01	2663.61	2553.44	2549.94	1559.63	3400.45	2259.77	2137.26	2736.37	2394.96	2843.6	1922.17	1961.96	1992.15	1953.04	2127.43	2969.97	2725.06	2297.3	1419.75	3307.69	2966	1646.83	1883.53	2494.74	2188.16	3704.52	3651.5	2282.21	2482.76	1796.47	2724.39	1636.75	2582.11	1896.23	1518.72	2067.21	2069.92	2549.02	2156.86	2270.97	2946.43
	10 days, 0:02:54	1122.86	1141.16	977.398	1341.79	1297.19	1312.36	1307.04	1834.86	1862.01	1629.81	1761.12	1983.39	965.491	1767.68	873.276	1156.27	1513.61	2612.98	1752.85	1860.46	2025.9	2074.28	2279.34	2115.77	1177.39	797.956	1365.83	1239.85	1078.48	1859.06	843.529	952.381	1797.84	1677.85	1374.6	926.431	1191.2	1186.72	1442.79	1141.87	899.713	1557.09	1761.7	1481.98	1150.93	1413.77	1477.27	2077.69
	10 days, 23:48:12	2138	2224.67	2742.66	3388.32	1850.17	2500	2085.75	2144.55	3049.82	2639.72	2167.83	1156.69	1394.91	1971.05	3006.76	2897.53	2027.18	3017.34	1956.75	1880.63	2343.95	2301.3	2551.14	2593.58	2577.09	2298.97	3136.84	2589.29	1721.92	2197.8	1894.98	2456.14	2244.44	3381.7	2219.6	2475.37	2362.82	1788.44	1786.49	1941.11	2091.3	2530.99	1762.07	1716.17	1810.06	2805.32	2863.69	3127.46
	00:00:00	?????	?????	?????	?????	?????	?????	?????	?????	?????	?????	?????	?????	?????	?????	?????	?????	?????	?????	?????	?????	?????	?????	?????	?????	?????	?????	?????	?????	?????	?????	?????	?????	?????	?????	?????	?????	?????	?????	?????	?????	?????	?????	?????	?????	?????	?????	?????	?????
	00:00:00	?????	?????	?????	?????	?????	?????	?????	?????	?????	?????	?????	?????	?????	?????	?????	?????	?????	?????	?????	?????	?????	?????	?????	?????	?????	?????	?????	?????	?????	?????	?????	?????	?????	?????	?????	?????	?????	?????	?????	?????	?????	?????	?????	?????	?????	?????	?????	?????
	00:00:00	?????	?????	?????	?????	?????	?????	?????	?????	?????	?????	?????	?????	?????	?????	?????	?????	?????	?????	?????	?????	?????	?????	?????	?????	?????	?????	?????	?????	?????	?????	?????	?????	?????	?????	?????	?????	?????	?????	?????	?????	?????	?????	?????	?????	?????	?????	?????	?????
	00:00:00	?????	?????	?????	?????	?????	?????	?????	?????	?????	?????	?????	?????	?????	?????	?????	?????	?????	?????	?????	?????	?????	?????	?????	?????	?????	?????	?????	?????	?????	?????	?????	?????	?????	?????	?????	?????	?????	?????	?????	?????	?????	?????	?????	?????	?????	?????	?????	?????
	00:00:00	?????	?????	?????	?????	?????	?????	?????	?????	?????	?????	?????	?????	?????	?????	?????	?????	?????	?????	?????	?????	?????	?????	?????	?????	?????	?????	?????	?????	?????	?????	?????	?????	?????	?????	?????	?????	?????	?????	?????	?????	?????	?????	?????	?????	?????	?????	?????	?????
	00:00:00	?????	?????	?????	?????	?????	?????	?????	?????	?????	?????	?????	?????	?????	?????	?????	?????	?????	?????	?????	?????	?????	?????	?????	?????	?????	?????	?????	?????	?????	?????	?????	?????	?????	?????	?????	?????	?????	?????	?????	?????	?????	?????	?????	?????	?????	?????	?????	?????
	00:00:00	?????	?????	?????	?????	?????	?????	?????	?????	?????	?????	?????	?????	?????	?????	?????	?????	?????	?????	?????	?????	?????	?????	?????	?????	?????	?????	?????	?????	?????	?????	?????	?????	?????	?????	?????	?????	?????	?????	?????	?????	?????	?????	?????	?????	?????	?????	?????	?????
	00:00:00	?????	?????	?????	?????	?????	?????	?????	?????	?????	?????	?????	?????	?????	?????	?????	?????	?????	?????	?????	?????	?????	?????	?????	?????	?????	?????	?????	?????	?????	?????	?????	?????	?????	?????	?????	?????	?????	?????	?????	?????	?????	?????	?????	?????	?????	?????	?????	?????
	00:00:00	?????	?????	?????	?????	?????	?????	?????	?????	?????	?????	?????	?????	?????	?????	?????	?????	?????	?????	?????	?????	?????	?????	?????	?????	?????	?????	?????	?????	?????	?????	?????	?????	?????	?????	?????	?????	?????	?????	?????	?????	?????	?????	?????	?????	?????	?????	?????	?????
	00:00:00	?????	?????	?????	?????	?????	?????	?????	?????	?????	?????	?????	?????	?????	?????	?????	?????	?????	?????	?????	?????	?????	?????	?????	?????	?????	?????	?????	?????	?????	?????	?????	?????	?????	?????	?????	?????	?????	?????	?????	?????	?????	?????	?????	?????	?????	?????	?????	?????
	00:00:00	?????	?????	?????	?????	?????	?????	?????	?????	?????	?????	?????	?????	?????	?????	?????	?????	?????	?????	?????	?????	?????	?????	?????	?????	?????	?????	?????	?????	?????	?????	?????	?????	?????	?????	?????	?????	?????	?????	?????	?????	?????	?????	?????	?????	?????	?????	?????	?????
Ratio cfp od
	Time	A1	A2	A3	A4	A5	A6	A7	A8	A9	A10	A11	A12	B1	B2	B3	B4	B5	B6	B7	B8	B9	B10	B11	B12	C1	C2	C3	C4	C5	C6	C7	C8	C9	C10	C11	C12	D1	D2	D3	D4	D5	D6	D7	D8	D9	D10	D11	D12
	00:00:03	47115	44840	43177.1	42826.2	48254.9	48758.5	48820.6	56027.9	39980.3	43025	42396.4	38796.2	50234.5	47356.9	37908.9	42267	50559.3	51786.9	44477.1	46046.1	37992.3	33814.9	33157.7	48394.3	55692.9	43823.6	33810.6	37239.8	38278.8	37213	39380.2	39168.8	29764.7	30242	35488	46410	50368.9	37003.7	28817.2	36000	35913.5	38256.4	39266.9	41519.8	29285.7	30651.3	35807.3	50275.7
	23:44:58	44005.6	42378.4	42002.9	38456.5	40649.4	43776.3	45124.8	38927	36503.9	38113.6	38324.1	40748.3	49741.9	39755.2	38215.5	33732.4	40985.2	36191.4	40417.7	40728.5	35424.5	38851.1	45350.6	48766.2	57872	42056.9	32075.3	29443.4	47092.6	37347	38390.1	37187.9	26833.3	32067.9	38307.8	47886.8	52228.9	34105.3	28118	27512.8	34632.8	32321	33663.4	35122.5	27544.9	30983.9	42307.7	43000
	1 day, 23:39:37	51159.9	40357.7	40691.7	40283.6	64003.8	64383.1	60281.2	67828.6	47740	42763.8	41554.8	37992	40398.9	59531.4	50690.1	44913.1	70908.2	58425.3	63093.9	60234.4	55511.1	45311.7	48076.7	41755.9	62945.7	50888.6	43146.9	51891.7	59348.2	71541.9	51958.8	55147.3	49872.2	47939.4	44933.5	42570	46283.1	52473.9	42814.2	48877.2	52704.4	50288.8	53970	55944.5	54245.7	57437.4	46906.9	42092.6
	2 days, 23:59:32	62418.9	63683.2	70426.6	73663	80208.6	71461.6	83086.6	93531.6	85982.3	73872.8	78421.6	73626.8	71168.3	78487.9	63265.9	74077	82704.7	85750.6	81798.1	82716.8	79710	74724.2	79517.3	81586	72240.7	74178.8	72709.2	64494.1	78500	76390.5	74518.7	74838.7	78043.9	75436.6	70866	79672.5	81529.9	72884.4	59715.4	78373.4	75343	75319.1	66561.2	74482.4	71947.4	76240.8	75123.5	76002.1
	3 days, 23:49:38	66741.4	67043.1	71729.6	73147.6	64832.3	74856.9	79452.1	80959.2	77991	76495.6	93530.2	77675.6	81863.3	71602.3	79979.3	75655.3	82978.1	80612.4	81211.8	83507.9	76359.6	72741	86979.2	92412.5	80338.3	76612.6	74230.4	70310.7	74493	73705.3	81430.1	73730	81369.7	79746.5	77596.2	86919.4	81289.3	81710.9	69329.7	74219.8	74696.7	72379	84636.8	84816.9	88037.7	77022.2	84914.3	83587.4
	4 days, 23:52:47	62697.7	67584.2	67869.8	69920.2	70124.9	80031.7	77194.5	79126.4	71744	83842.5	76861	86482.8	63684.7	69641.8	74239.7	71330	71248.8	64717.3	75373.6	78210.2	74430.6	79542	81422.1	89014.8	66798.9	59299.2	65068.1	71822.8	66605.7	65832.5	73923.4	68299.4	69075.1	73907.2	72410.3	86731.8	61900.6	67200.4	55731.3	58587.2	60248.4	68097.1	63985.6	67765.3	70873.9	71052.6	80605.4	90120.5
	5 days, 23:56:35	62366.5	67929.7	60582.2	66676.2	71159.8	71363.6	64468.1	67730.3	69260.4	72609.5	74416.4	63945.5	68690.5	66712.5	63057.8	63508.3	62350.4	66855.1	64754.7	68055.8	74172.4	66034.6	68238.4	68415	66711.3	63389.7	54297.7	53287.1	48794.5	52566.2	50551.2	54657	65030.9	60447.5	60485.1	72054	64127	67565.7	56150.6	53898.1	50742.4	47412.5	49346.9	50025.9	51418.2	59123.2	63330.4	75700.6
	7 days, 0:05:08	23228.1	25727.3	30949	32292.1	51042.4	33243.9	36982.8	69011.1	63619	48680.3	60121.3	79304.1	73619	40956.7	42378.7	56185.5	59301.6	72230.2	56053.4	64708	78537.9	71483.5	77098.6	83893.8	42907.2	33436.8	37204.4	40869.8	41449.2	52686.7	48708.9	63521	70552	74881.7	74739.6	81659.2	38643.9	44360.5	39702.2	43082.1	57189.1	48189.8	52896.2	63166.3	65498.2	64635.6	69768	73064.7
	8 days, 0:06:03	60905.2	55714.3	64879.4	63313.3	58178.2	61414.9	65337.5	65472.7	63080.3	64969.4	66505.7	62577.1	60519.8	62446.2	63958.5	63787.3	57138.1	60017.1	61744.1	63271.9	68150.2	64705.9	65680.4	76481.7	63749	58281.6	64658.4	60579.6	55032.4	62384.6	60766.6	63868.8	63922.7	69515.8	65707.5	81281.8	59951.4	63605.5	53425	51967.2	52530.5	55646.9	55319.6	55380.4	66663.8	71465	72695.3	76445.7
	8 days, 23:19:39	78055.2	80833.3	69857.7	80478.4	82599.3	86893.1	78445.8	76624.6	88123.5	82632.2	82488.5	78143.2	73463.6	70372.5	78665.2	71733.2	81457.3	88443.4	71431.4	71707.6	79530.4	78812.1	81657.4	100414	67126.1	55748.5	73747.3	76647.1	66746	60336.7	72084.2	74006.3	125678	73185.4	83460.1	95321.8	65503.6	77719.1	75005.3	74643.3	66896.2	78994.7	74684.3	65933.8	82451	90069.2	95083.9	94609.4
	10 days, 0:02:54	33625.4	38426.2	46872.3	44312.4	48819.5	54067.5	55467.9	58440.4	57896.9	57100.7	61586.7	66383.8	30589.4	35919.2	53939.6	49852.8	60280.6	62152.8	59500.4	59212.9	62719.7	61431.2	67575.2	70259.5	30093.6	29414.3	42196	36280.5	35194.9	48489.9	46400.5	47517	59506.2	54272.9	60546.6	64532.2	30280.5	41344.6	38298.5	41245.7	41094.6	49335.6	49948.8	45126.8	47760.2	52812.7	58149.4	62646.8
	10 days, 23:48:12	68182.7	74900.9	71410.8	82093.9	70964.8	78287.5	74356.9	76599.5	95382.7	80011.9	71678.3	60959.8	59754.9	74164.8	92488.7	78362.8	74428.1	88531.8	67363.5	75686.9	87261.1	76880.2	85679.9	108302	75231.3	70051.5	65800	71763.4	68096.3	78424.9	72408.7	70350.9	72344.4	70156.2	78087.4	89827.6	71455.8	74591.1	68986.9	68549.6	68460.7	69855.4	78956.2	72288.2	77586.6	76602.2	82061.9	98134
	00:00:00	?????	?????	?????	?????	?????	?????	?????	?????	?????	?????	?????	?????	?????	?????	?????	?????	?????	?????	?????	?????	?????	?????	?????	?????	?????	?????	?????	?????	?????	?????	?????	?????	?????	?????	?????	?????	?????	?????	?????	?????	?????	?????	?????	?????	?????	?????	?????	?????
	00:00:00	?????	?????	?????	?????	?????	?????	?????	?????	?????	?????	?????	?????	?????	?????	?????	?????	?????	?????	?????	?????	?????	?????	?????	?????	?????	?????	?????	?????	?????	?????	?????	?????	?????	?????	?????	?????	?????	?????	?????	?????	?????	?????	?????	?????	?????	?????	?????	?????
	00:00:00	?????	?????	?????	?????	?????	?????	?????	?????	?????	?????	?????	?????	?????	?????	?????	?????	?????	?????	?????	?????	?????	?????	?????	?????	?????	?????	?????	?????	?????	?????	?????	?????	?????	?????	?????	?????	?????	?????	?????	?????	?????	?????	?????	?????	?????	?????	?????	?????
	00:00:00	?????	?????	?????	?????	?????	?????	?????	?????	?????	?????	?????	?????	?????	?????	?????	?????	?????	?????	?????	?????	?????	?????	?????	?????	?????	?????	?????	?????	?????	?????	?????	?????	?????	?????	?????	?????	?????	?????	?????	?????	?????	?????	?????	?????	?????	?????	?????	?????
	00:00:00	?????	?????	?????	?????	?????	?????	?????	?????	?????	?????	?????	?????	?????	?????	?????	?????	?????	?????	?????	?????	?????	?????	?????	?????	?????	?????	?????	?????	?????	?????	?????	?????	?????	?????	?????	?????	?????	?????	?????	?????	?????	?????	?????	?????	?????	?????	?????	?????
	00:00:00	?????	?????	?????	?????	?????	?????	?????	?????	?????	?????	?????	?????	?????	?????	?????	?????	?????	?????	?????	?????	?????	?????	?????	?????	?????	?????	?????	?????	?????	?????	?????	?????	?????	?????	?????	?????	?????	?????	?????	?????	?????	?????	?????	?????	?????	?????	?????	?????
	00:00:00	?????	?????	?????	?????	?????	?????	?????	?????	?????	?????	?????	?????	?????	?????	?????	?????	?????	?????	?????	?????	?????	?????	?????	?????	?????	?????	?????	?????	?????	?????	?????	?????	?????	?????	?????	?????	?????	?????	?????	?????	?????	?????	?????	?????	?????	?????	?????	?????
	00:00:00	?????	?????	?????	?????	?????	?????	?????	?????	?????	?????	?????	?????	?????	?????	?????	?????	?????	?????	?????	?????	?????	?????	?????	?????	?????	?????	?????	?????	?????	?????	?????	?????	?????	?????	?????	?????	?????	?????	?????	?????	?????	?????	?????	?????	?????	?????	?????	?????
	00:00:00	?????	?????	?????	?????	?????	?????	?????	?????	?????	?????	?????	?????	?????	?????	?????	?????	?????	?????	?????	?????	?????	?????	?????	?????	?????	?????	?????	?????	?????	?????	?????	?????	?????	?????	?????	?????	?????	?????	?????	?????	?????	?????	?????	?????	?????	?????	?????	?????
	00:00:00	?????	?????	?????	?????	?????	?????	?????	?????	?????	?????	?????	?????	?????	?????	?????	?????	?????	?????	?????	?????	?????	?????	?????	?????	?????	?????	?????	?????	?????	?????	?????	?????	?????	?????	?????	?????	?????	?????	?????	?????	?????	?????	?????	?????	?????	?????	?????	?????
	00:00:00	?????	?????	?????	?????	?????	?????	?????	?????	?????	?????	?????	?????	?????	?????	?????	?????	?????	?????	?????	?????	?????	?????	?????	?????	?????	?????	?????	?????	?????	?????	?????	?????	?????	?????	?????	?????	?????	?????	?????	?????	?????	?????	?????	?????	?????	?????	?????	?????
Ratio yfp cfp
	Time	A1	A2	A3	A4	A5	A6	A7	A8	A9	A10	A11	A12	B1	B2	B3	B4	B5	B6	B7	B8	B9	B10	B11	B12	C1	C2	C3	C4	C5	C6	C7	C8	C9	C10	C11	C12	D1	D2	D3	D4	D5	D6	D7	D8	D9	D10	D11	D12
	00:00:15	4.067	3.433	4.989	2.859	3.236	5.319	6.223	4.474	4.871	4.555	5.079	4.174	3.32	3.278	4.287	4.117	4.658	6.074	5.175	7.905	4.186	5.006	3.976	4.673	4.205	4.622	4.027	5.232	4.191	4.316	3.596	3.314	4.562	5.164	5.862	4.394	4.887	4.19	5.575	4.296	3.913	4.569	4.141	4.188	5.813	4.689	5.495	5.91
	23:45:10	4.011	6.184	4.674	5.692	2.889	4.807	3.877	3.833	6.267	4.261	4.538	4.378	3.687	4.404	3.414	3.173	2.992	4.59	4.442	2.961	4.574	5.624	6.132	5.246	3.427	4.431	2.638	3.732	5.137	2.828	3.817	3.549	4.274	3.485	5.057	5.451	2.813	3.545	4.681	5.634	2.628	4.541	5.359	4.497	5.05	3.874	5.196	5.323
	1 day, 23:39:49	6.006	4.891	4.806	4.584	4.131	3.242	4.504	7.188	4.945	6.859	4.344	6.061	4.441	4.883	5.538	5.631	3.686	4.649	4.275	6.068	4.582	4.601	3.341	4.108	4.384	7.247	4.457	5.487	4.848	3.649	6.44	5.803	4.403	5.493	4.699	4.657	6.774	4.466	8.685	4.385	5.9	5.272	6.258	4.139	7.062	3.702	4.351	3.042
	2 days, 23:59:44	5.114	4.101	4.533	7.405	6.364	3.017	7.52	4.394	5.428	3.627	4.084	5.067	6.56	4.021	3.35	5.396	2.798	6.804	2.722	2.463	5.57	4.473	3.912	5.878	5.015	6.676	6.209	4.558	5.059	5.356	5.533	6.609	5.029	4.545	6.043	4.314	3.945	3.933	3.196	5.169	6.123	9.031	3.8	3.89	4.005	3.947	4.203	3.956
	3 days, 23:49:50	4.933	3.977	5.557	6.577	3.3	4.108	4.072	4.686	7.098	4.355	4.252	4.161	4.287	5.144	3.117	6.414	3.519	3.185	3.291	3.551	3.131	5.62	2.83	6.248	3.752	6.531	4.953	5.796	4.042	3.48	3.126	3.943	6.797	4.773	5.558	4.959	4.547	2.845	5.341	4.79	3.733	3.393	4.881	4.333	5.892	6.651	4.273	4.393
	4 days, 23:53:00	5.497	5.582	4.497	6.151	4.382	4.49	3.006	4.102	4.986	6.299	4.948	4.487	4.177	4.246	5.553	4.183	5.585	5.869	3.49	6.028	3.984	2.86	4.78	4.71	6.916	4.545	5.142	4.806	3.775	5.905	4.726	4.129	5.33	6.277	5.058	5.274	6	5.943	3.503	6.633	6.485	4.638	3.24	5.039	6.647	5.624	6.453	5.627
	5 days, 23:56:48	4.012	5.16	6.862	4.726	6.245	4.526	4.719	5.278	6.457	4.199	5.417	3.01	3.391	3.995	6.707	6.688	4.088	3.045	5.537	8.405	5.679	3.661	3.859	5.637	3.97	5.15	5.465	5.133	6.088	5.377	3.392	3.605	8.581	5.329	6.954	4.406	4.661	5.146	5.927	4.5	2.982	4.06	4.313	5.075	6.542	5.849	3.029	4.628
	7 days, 0:05:21	4.675	4.799	3.823	4.577	3.626	6.84	6.043	7.388	5.956	7.248	5.448	8.817	7.273	5.672	4.06	5.817	5.447	4.321	6.695	8.34	5.653	5.786	6.87	5.853	5.75	4.534	6.939	5.979	6.95	9.63	5.35	5.34	5.808	4.175	6.911	4.712	4.707	6.323	4.195	7.556	5.186	3.47	4.006	6.055	8.455	9.026	6.244	4.156
	8 days, 0:06:15	7.74	5.289	4.321	6.66	5.655	3.729	4.206	6.043	4.514	4.559	5.749	5.317	4.297	7.52	5.034	6.971	5.701	3.358	3.593	3.422	4.468	5.398	4.988	4.741	4.656	3.405	4.371	4.116	4.708	3.459	4.152	2.688	6.536	4.524	5.241	3.526	4.988	6.707	5.752	5.83	4.513	4.038	3.919	3.808	5.612	5.683	7.055	4.197
	8 days, 23:19:51	6.974	4.516	5.369	4.632	3.955	6.304	4.702	3.849	5.798	5.712	6.269	4.046	5.53	4.525	3.793	3.872	5.169	3.667	4.064	2.562	4.75	5.887	6.624	4.258	4.193	5.892	6.526	5.222	4.691	3.359	4.917	4.18	6.041	5.759	4.778	4.267	5.191	6.362	5.146	7.566	3.685	2.751	4.251	7.15	5.058	5.78	6.548	4.709
	10 days, 0:03:06	6.474	6.223	4.567	6.395	3.963	4.118	3.341	6.131	7.084	4.907	3.888	5.555	6.776	3.813	3.099	4.793	4.31	3.16	3.64	3.995	5.649	4.916	3.892	3.931	4.197	4.244	5.348	5.099	4.093	5.585	5.536	5.074	7.229	5.322	5.31	5.635	5.026	5.384	3.547	5.731	4.589	4.633	3.053	2.949	8.922	4.809	4.663	5.167
	10 days, 23:48:24	4.9	6.038	5.03	4.572	2.94	6.578	5.357	5.007	4.559	6.487	4.226	5.141	8.63	3.589	6.164	6.329	4.465	3.841	5.713	3.082	4.127	4.301	5.494	4.582	5.476	4.584	4.331	9.962	4.196	5.171	5.735	5.418	4.735	6.669	5.159	6.608	4.351	10.481	5.812	6.336	3.583	5.5	4.632	5.122	5.069	5.117	5.845	4.432
	00:00:00	?????	?????	?????	?????	?????	?????	?????	?????	?????	?????	?????	?????	?????	?????	?????	?????	?????	?????	?????	?????	?????	?????	?????	?????	?????	?????	?????	?????	?????	?????	?????	?????	?????	?????	?????	?????	?????	?????	?????	?????	?????	?????	?????	?????	?????	?????	?????	?????
	00:00:00	?????	?????	?????	?????	?????	?????	?????	?????	?????	?????	?????	?????	?????	?????	?????	?????	?????	?????	?????	?????	?????	?????	?????	?????	?????	?????	?????	?????	?????	?????	?????	?????	?????	?????	?????	?????	?????	?????	?????	?????	?????	?????	?????	?????	?????	?????	?????	?????
	00:00:00	?????	?????	?????	?????	?????	?????	?????	?????	?????	?????	?????	?????	?????	?????	?????	?????	?????	?????	?????	?????	?????	?????	?????	?????	?????	?????	?????	?????	?????	?????	?????	?????	?????	?????	?????	?????	?????	?????	?????	?????	?????	?????	?????	?????	?????	?????	?????	?????
	00:00:00	?????	?????	?????	?????	?????	?????	?????	?????	?????	?????	?????	?????	?????	?????	?????	?????	?????	?????	?????	?????	?????	?????	?????	?????	?????	?????	?????	?????	?????	?????	?????	?????	?????	?????	?????	?????	?????	?????	?????	?????	?????	?????	?????	?????	?????	?????	?????	?????
	00:00:00	?????	?????	?????	?????	?????	?????	?????	?????	?????	?????	?????	?????	?????	?????	?????	?????	?????	?????	?????	?????	?????	?????	?????	?????	?????	?????	?????	?????	?????	?????	?????	?????	?????	?????	?????	?????	?????	?????	?????	?????	?????	?????	?????	?????	?????	?????	?????	?????
	00:00:00	?????	?????	?????	?????	?????	?????	?????	?????	?????	?????	?????	?????	?????	?????	?????	?????	?????	?????	?????	?????	?????	?????	?????	?????	?????	?????	?????	?????	?????	?????	?????	?????	?????	?????	?????	?????	?????	?????	?????	?????	?????	?????	?????	?????	?????	?????	?????	?????
	00:00:00	?????	?????	?????	?????	?????	?????	?????	?????	?????	?????	?????	?????	?????	?????	?????	?????	?????	?????	?????	?????	?????	?????	?????	?????	?????	?????	?????	?????	?????	?????	?????	?????	?????	?????	?????	?????	?????	?????	?????	?????	?????	?????	?????	?????	?????	?????	?????	?????
	00:00:00	?????	?????	?????	?????	?????	?????	?????	?????	?????	?????	?????	?????	?????	?????	?????	?????	?????	?????	?????	?????	?????	?????	?????	?????	?????	?????	?????	?????	?????	?????	?????	?????	?????	?????	?????	?????	?????	?????	?????	?????	?????	?????	?????	?????	?????	?????	?????	?????
	00:00:00	?????	?????	?????	?????	?????	?????	?????	?????	?????	?????	?????	?????	?????	?????	?????	?????	?????	?????	?????	?????	?????	?????	?????	?????	?????	?????	?????	?????	?????	?????	?????	?????	?????	?????	?????	?????	?????	?????	?????	?????	?????	?????	?????	?????	?????	?????	?????	?????
	00:00:00	?????	?????	?????	?????	?????	?????	?????	?????	?????	?????	?????	?????	?????	?????	?????	?????	?????	?????	?????	?????	?????	?????	?????	?????	?????	?????	?????	?????	?????	?????	?????	?????	?????	?????	?????	?????	?????	?????	?????	?????	?????	?????	?????	?????	?????	?????	?????	?????
	00:00:00	?????	?????	?????	?????	?????	?????	?????	?????	?????	?????	?????	?????	?????	?????	?????	?????	?????	?????	?????	?????	?????	?????	?????	?????	?????	?????	?????	?????	?????	?????	?????	?????	?????	?????	?????	?????	?????	?????	?????	?????	?????	?????	?????	?????	?????	?????	?????	?????
Ratio cfp2 od
	Time	A1	A2	A3	A4	A5	A6	A7	A8	A9	A10	A11	A12	B1	B2	B3	B4	B5	B6	B7	B8	B9	B10	B11	B12	C1	C2	C3	C4	C5	C6	C7	C8	C9	C10	C11	C12	D1	D2	D3	D4	D5	D6	D7	D8	D9	D10	D11	D12
	00:00:15	1242.69	1018.43	917.612	1309.26	1326.8	1091.4	1266.28	1284.88	1032.45	1262.14	818.772	1050.36	1436.25	1140.43	740.038	1078.55	1260.11	968.161	1252.35	809.693	1012.44	643.863	993.564	959.53	1164.08	991.026	835.518	765.46	1123.03	831.712	1040.4	1021.53	737.36	646.503	650.636	1308.63	1311.47	794.118	746.484	784.762	1059.28	784.615	1219.93	1145.37	772.665	689.655	876.095	1042.37
	23:45:10	1291.82	769.231	906.887	1000.93	922.852	928.681	1220.19	894.188	732.422	933.063	1066.93	1158.54	1002.15	876.872	922.495	965.412	1231.53	761.719	956.215	1147.7	731.132	664.336	935.065	891.473	1420.26	974.679	934.034	745.01	775.67	1047.78	990.712	817.414	842.949	864.151	886.85	1198.16	1310.57	899.248	652.949	562.103	918.019	881.447	661.386	836.801	678.196	823.124	1165.87	957.576
	1 day, 23:39:49	1015.73	997.29	1073.35	1186.97	1954.46	1942.91	1203.87	1246.35	1078.29	974.771	1077.74	736.278	1137.47	1549.51	1098.59	1307.15	1806.64	1850.53	1408.84	1325.52	1303.24	1318.18	1497.52	1004.12	1748.49	1029.62	877.305	1193.09	1801.03	1944.13	954.733	1243.86	1511.28	1461.28	1003.63	1099.14	1060.12	1132.73	778.663	1368.42	1069.52	940.594	978.69	1218.2	1063.48	1819.7	1026.51	1205.36
	2 days, 23:59:44	1209.44	1871.29	2070.26	1599.51	1864.41	1871.71	1543.29	2443.04	2015.21	2138.73	2150.42	1712.92	1511.25	2141.28	2207.91	1372.16	2208.44	1852.3	2424.59	2323.7	1621.91	1504.51	2025.18	1853.76	2043.57	1653.63	1401.67	2193.82	1451.22	1928.99	1528.88	1182.8	2055.89	1850.31	1659.79	2343.91	2028.83	2226.93	1533.6	1832.76	1268.19	1097.42	1530.61	1977.23	2273.68	2175.29	1923.87	1659.71
	3 days, 23:49:50	1820.73	1655.5	1561.85	1339.2	2063.63	1737.41	1896.73	2408.16	1492.7	1997.82	2650.92	1721.07	2304.3	2142.86	2308.49	1496.39	2152.56	2019.14	1931.03	1748.69	2314.61	1586.35	2245.37	1652.59	1701.9	1545.8	1868.35	1621.36	2137.18	2105.26	2058.51	1920	1915.37	1774.19	1645.3	2026.07	1666.67	2401.7	1212.12	1625.12	2162.43	1844.76	1976.5	1931.19	1740.58	1688.89	2514.29	2309.42
	4 days, 23:52:59	1720.93	1289.7	1942.8	1516.97	1959.65	2050.74	1732.2	2117.16	1421.37	2361.93	2069.97	2070.76	1661.92	1837.89	1664.82	2049.26	1813.68	1269.69	2026.61	1508.85	1904.76	2486.37	1706.48	2224.58	1237.02	1385.83	1643.97	1661.63	1628.55	1431.35	1511.39	1975.56	1840.08	1711.34	1948.72	2301.85	1756.91	1917.21	1692.18	1182.98	1171.25	1655.57	1759.42	1446.01	1658.39	1688.18	1558.3	1675.79
	5 days, 23:56:47	2153.03	1367.52	1502.35	1814.71	1393.76	1897.23	1856.87	1367.52	1360.95	2005.84	1409.9	1603.11	1968.86	1978.02	1244.44	1119.86	1698.94	2014.59	1283.02	1164.58	1341.82	1790.18	1832.74	1691.9	1933.05	1231.88	1312.98	1040.22	1126.48	1053	1116.61	1737.81	1202.48	1308.09	1114.89	2111.86	1528.82	1619.96	1150.63	1159.24	1446.7	1308.81	1135.07	859.729	1127.27	1373.04	1218.23	2140.11
	7 days, 0:05:20	565.468	500.63	860.543	860.113	1651.94	454.959	883.621	1273.18	1880.95	1124.54	1648.13	1546.39	1646.26	1202.33	1335.55	1204.59	1336.03	1906.47	1220.21	1191.89	1958.22	2307.69	1408.45	2212.39	909.65	836.859	723.757	907.384	1092.03	876.623	1467.52	1754.97	1874.2	2204.23	1614.58	2436.47	916.31	1170.06	1240.69	934.439	1515.15	1476.27	1511.84	1252.85	1184.06	1385.9	1585.05	2364.6
	8 days, 0:06:15	846.024	1587.3	1790.35	1290.88	1324.24	1666.67	1767.32	1281.82	1853.49	1764.19	1571.55	1446.64	1361.39	1586.02	2053.31	1203.87	1222.96	1807.33	1744.08	1789.47	1906.1	1592.76	1488.58	1777.99	1354.95	1592.62	1748	1790.66	1304.7	1452.99	1405.45	1589.57	1296.14	1646.13	1652.42	2346.84	1384.62	1131.77	1106.98	1297.22	1455.79	1590.56	1590.56	1374.22	1296.93	1464.97	1416.02	1950.05
	8 days, 23:19:51	1392.56	2358.97	1767.5	1808.63	2009.08	1698.11	1698.8	2743.97	2470.31	1797.88	1662.84	2438.48	1731.79	1588.23	2202.45	2058.82	2037.91	2228.77	2042.04	1992.15	2305.23	1630.67	1479.42	2214.11	1729.73	1280.86	1483.52	2485.35	1636.9	1419.47	1526.32	1469.35	2943.77	1886.79	1877.3	2712.64	2014.54	2069.69	1657.87	1540.2	1858.49	2021.39	1741.34	1168.35	1514.16	2041.52	1741.93	2220.98
	10 days, 0:03:06	785.498	897.783	1142.33	1014.69	1304.05	1565.62	1361.18	1209.34	989.194	1490.58	1717.52	1429.89	554.478	863.636	1457.65	1317.45	1675.17	1741.99	1411.04	1645.8	1711.38	1077.9	1968.96	1437.13	869.396	852.987	846.277	925.826	921.519	1067.11	1165.49	918.367	1080.25	1275.17	1165.6	1643.96	837.29	1262.93	1009.95	986.159	1100.29	1508.65	1513.16	1315.09	799.449	1125.09	1493.51	1355.01
	10 days, 23:48:24	2235.18	1718.06	1873.59	2728.43	2077.18	1362.5	1946.7	1777.25	2673.15	1878.72	2077.92	1747.33	1196.98	1870.82	1644.14	1967.02	2095.13	2543.35	1400.62	2072.07	2802.55	2052.2	2045.73	3101.6	2081.5	1412.37	1905.26	1473.21	1914.44	2002.44	1506.85	1995.61	2177.78	1551.34	1782.76	1822.66	2105.26	1177.75	1677.56	1363.14	1783.44	1590.91	2166.11	1617.16	1944.13	1970.98	1626.58	1918.53
	00:00:00	?????	?????	?????	?????	?????	?????	?????	?????	?????	?????	?????	?????	?????	?????	?????	?????	?????	?????	?????	?????	?????	?????	?????	?????	?????	?????	?????	?????	?????	?????	?????	?????	?????	?????	?????	?????	?????	?????	?????	?????	?????	?????	?????	?????	?????	?????	?????	?????
	00:00:00	?????	?????	?????	?????	?????	?????	?????	?????	?????	?????	?????	?????	?????	?????	?????	?????	?????	?????	?????	?????	?????	?????	?????	?????	?????	?????	?????	?????	?????	?????	?????	?????	?????	?????	?????	?????	?????	?????	?????	?????	?????	?????	?????	?????	?????	?????	?????	?????
	00:00:00	?????	?????	?????	?????	?????	?????	?????	?????	?????	?????	?????	?????	?????	?????	?????	?????	?????	?????	?????	?????	?????	?????	?????	?????	?????	?????	?????	?????	?????	?????	?????	?????	?????	?????	?????	?????	?????	?????	?????	?????	?????	?????	?????	?????	?????	?????	?????	?????
	00:00:00	?????	?????	?????	?????	?????	?????	?????	?????	?????	?????	?????	?????	?????	?????	?????	?????	?????	?????	?????	?????	?????	?????	?????	?????	?????	?????	?????	?????	?????	?????	?????	?????	?????	?????	?????	?????	?????	?????	?????	?????	?????	?????	?????	?????	?????	?????	?????	?????
	00:00:00	?????	?????	?????	?????	?????	?????	?????	?????	?????	?????	?????	?????	?????	?????	?????	?????	?????	?????	?????	?????	?????	?????	?????	?????	?????	?????	?????	?????	?????	?????	?????	?????	?????	?????	?????	?????	?????	?????	?????	?????	?????	?????	?????	?????	?????	?????	?????	?????
	00:00:00	?????	?????	?????	?????	?????	?????	?????	?????	?????	?????	?????	?????	?????	?????	?????	?????	?????	?????	?????	?????	?????	?????	?????	?????	?????	?????	?????	?????	?????	?????	?????	?????	?????	?????	?????	?????	?????	?????	?????	?????	?????	?????	?????	?????	?????	?????	?????	?????
	00:00:00	?????	?????	?????	?????	?????	?????	?????	?????	?????	?????	?????	?????	?????	?????	?????	?????	?????	?????	?????	?????	?????	?????	?????	?????	?????	?????	?????	?????	?????	?????	?????	?????	?????	?????	?????	?????	?????	?????	?????	?????	?????	?????	?????	?????	?????	?????	?????	?????
	00:00:00	?????	?????	?????	?????	?????	?????	?????	?????	?????	?????	?????	?????	?????	?????	?????	?????	?????	?????	?????	?????	?????	?????	?????	?????	?????	?????	?????	?????	?????	?????	?????	?????	?????	?????	?????	?????	?????	?????	?????	?????	?????	?????	?????	?????	?????	?????	?????	?????
	00:00:00	?????	?????	?????	?????	?????	?????	?????	?????	?????	?????	?????	?????	?????	?????	?????	?????	?????	?????	?????	?????	?????	?????	?????	?????	?????	?????	?????	?????	?????	?????	?????	?????	?????	?????	?????	?????	?????	?????	?????	?????	?????	?????	?????	?????	?????	?????	?????	?????
	00:00:00	?????	?????	?????	?????	?????	?????	?????	?????	?????	?????	?????	?????	?????	?????	?????	?????	?????	?????	?????	?????	?????	?????	?????	?????	?????	?????	?????	?????	?????	?????	?????	?????	?????	?????	?????	?????	?????	?????	?????	?????	?????	?????	?????	?????	?????	?????	?????	?????
	00:00:00	?????	?????	?????	?????	?????	?????	?????	?????	?????	?????	?????	?????	?????	?????	?????	?????	?????	?????	?????	?????	?????	?????	?????	?????	?????	?????	?????	?????	?????	?????	?????	?????	?????	?????	?????	?????	?????	?????	?????	?????	?????	?????	?????	?????	?????	?????	?????	?????
[truncated: 49 more columns]
