# Supplementary figures and images for: Adaptation dynamics between copy-number and point mutations
Source: eLife journal article supplement (doi:10.7554/elife.82240), 2022-12-22

Figure 1 - Figure Supplement 1

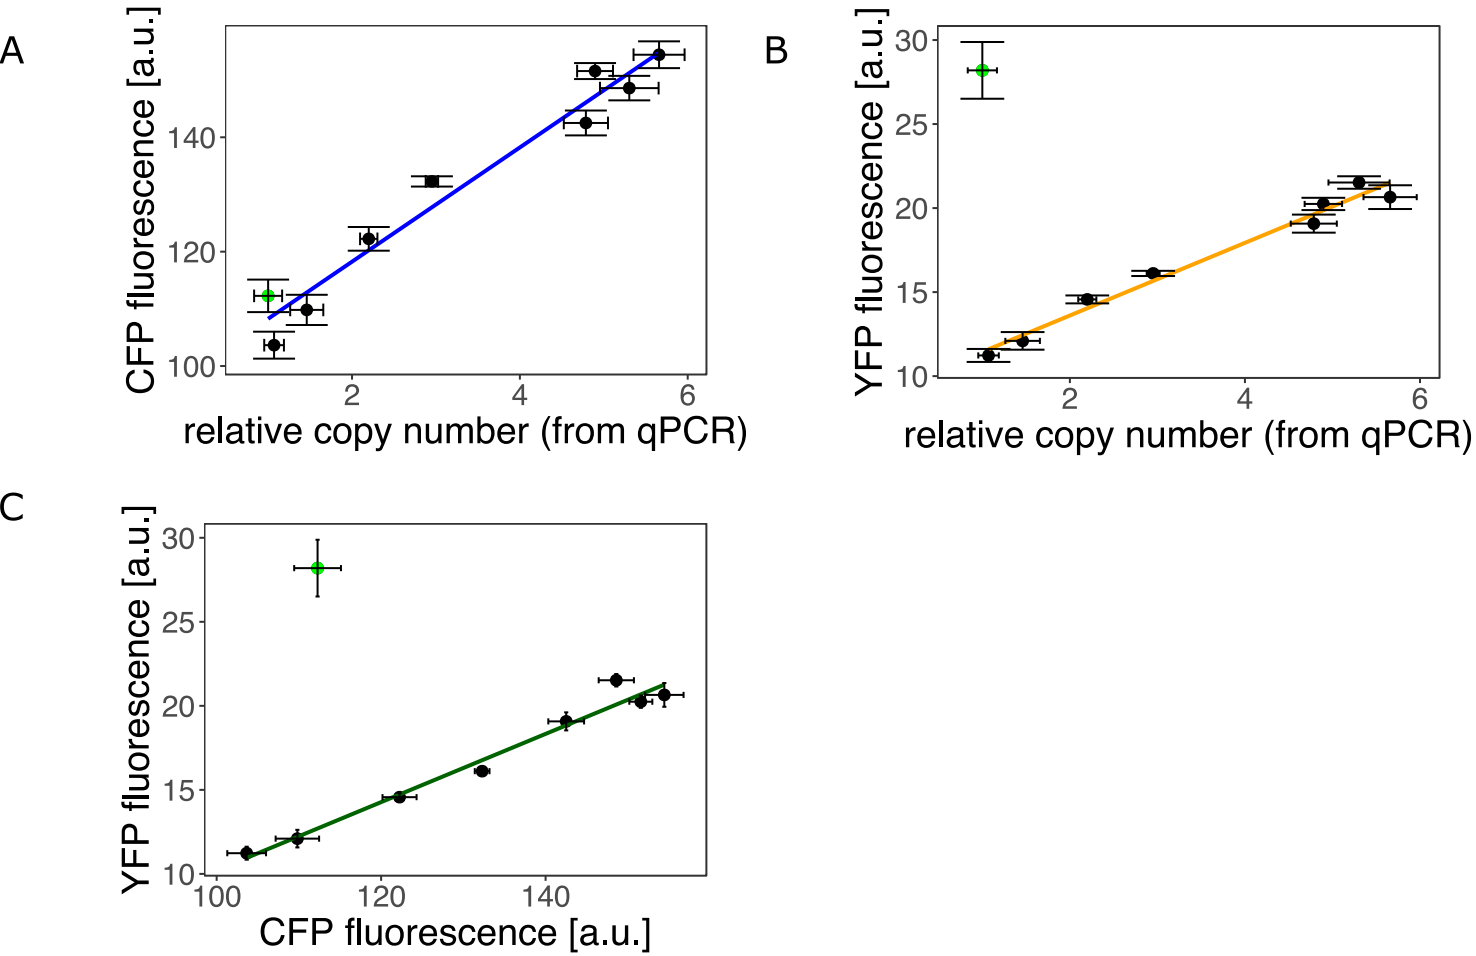

Supplement: supp [file elife-82240-supp-v1.zip]

Figure 4 - Figure Supplement 1

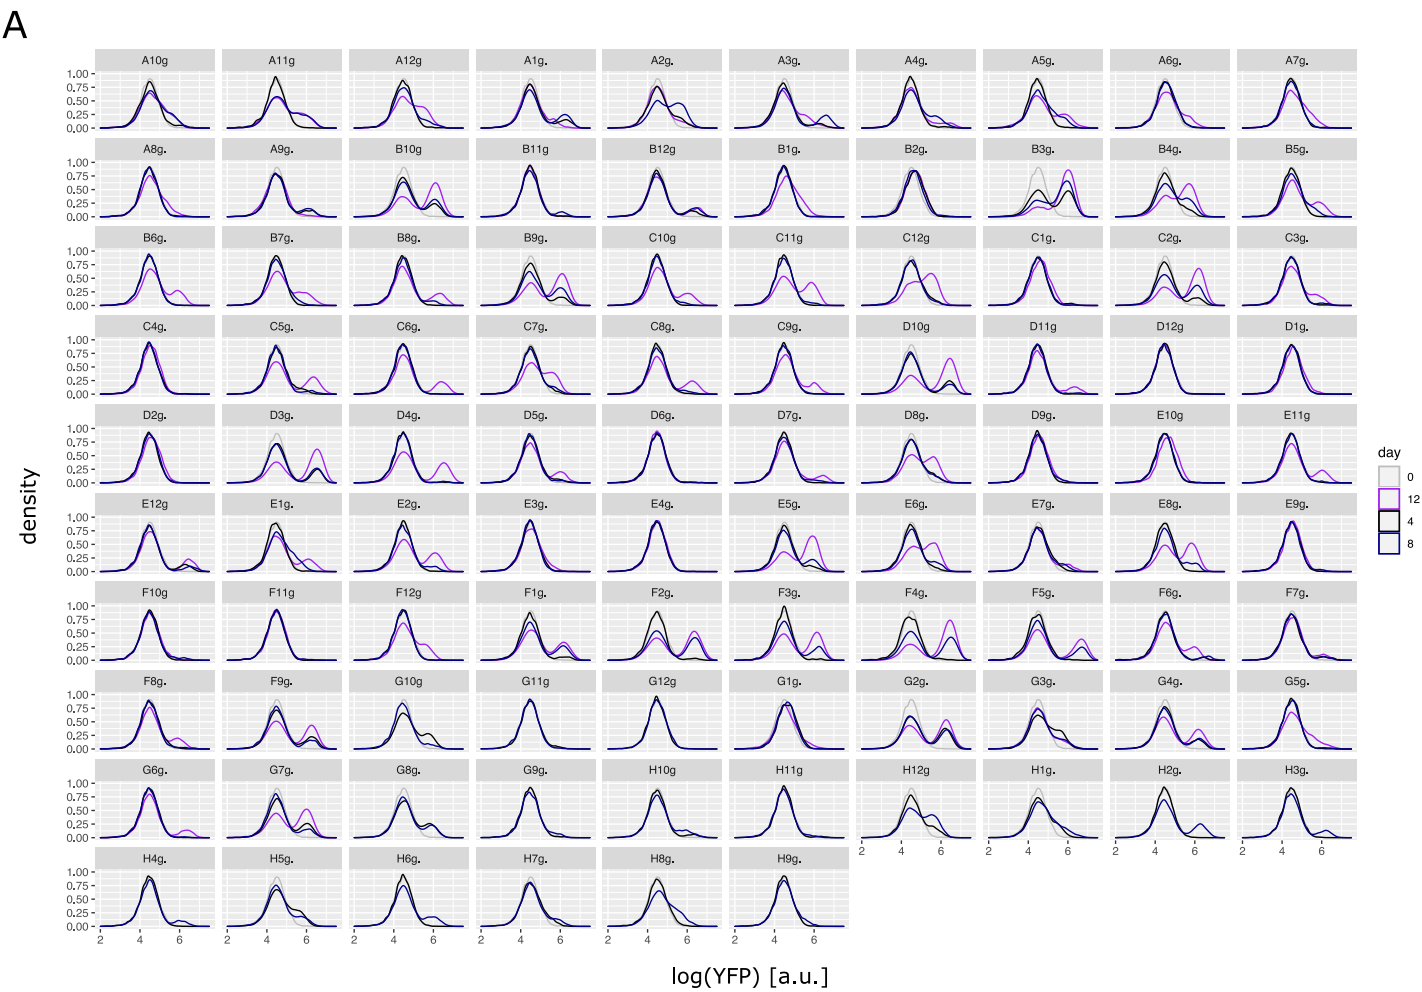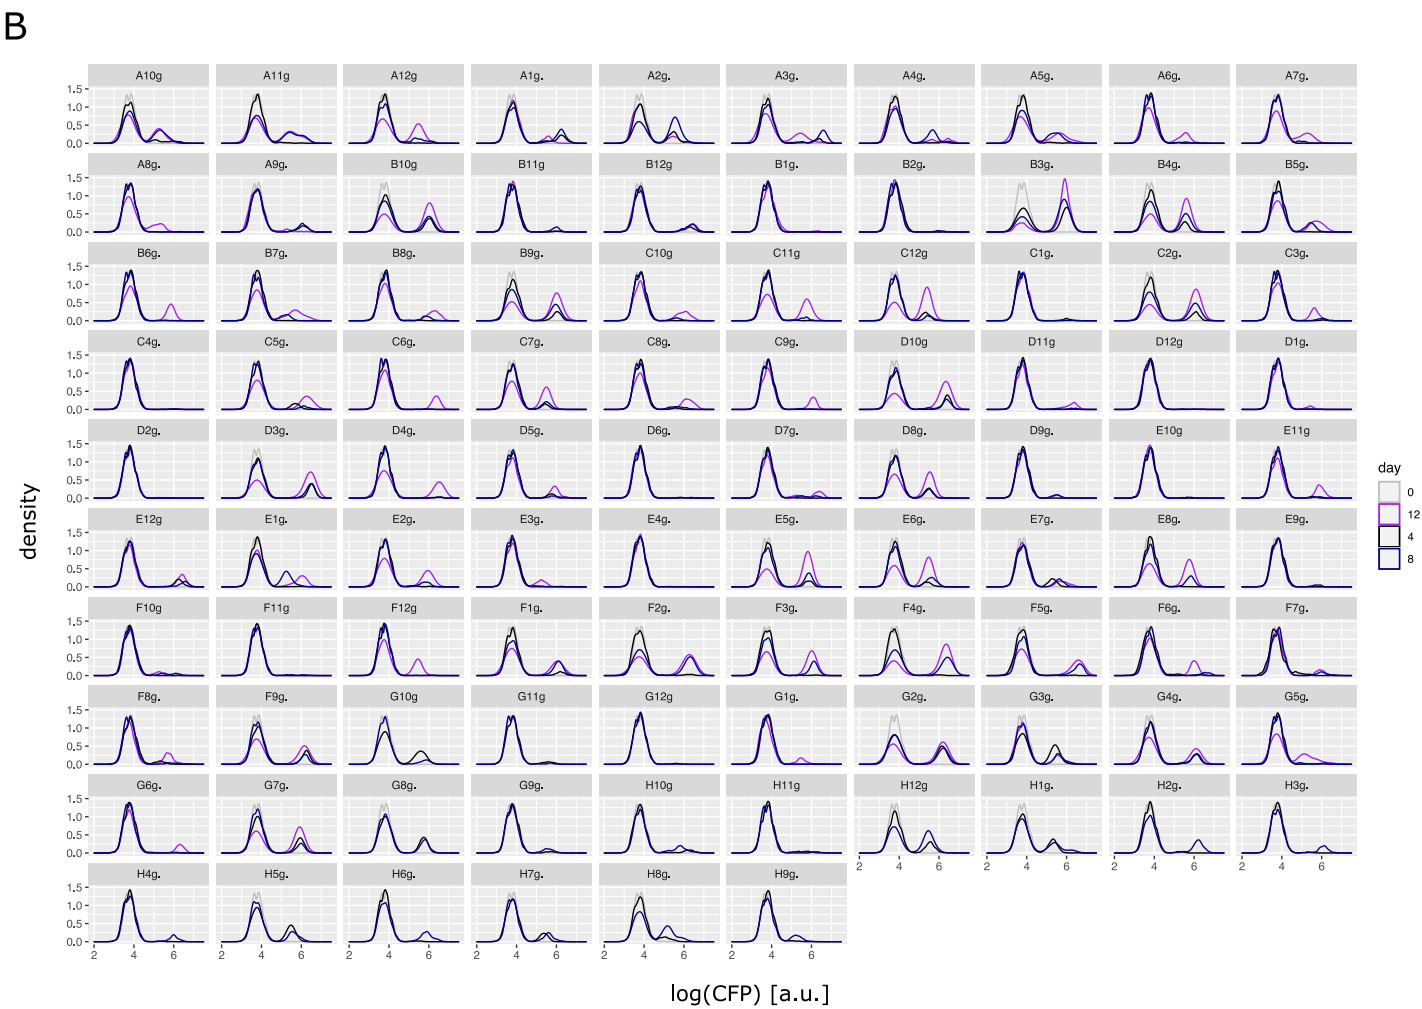

Supplement: supp [file elife-82240-supp-v1.zip]

Figure 6 - Figure Supplement 1

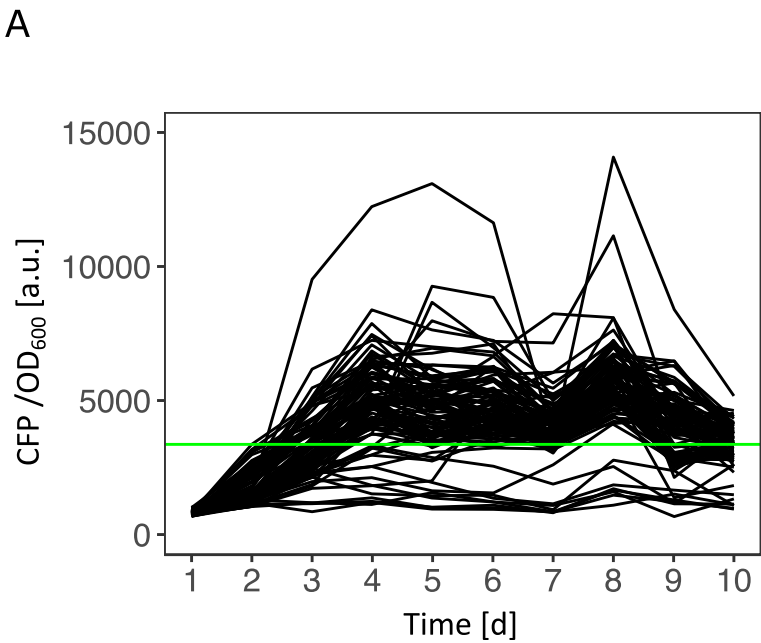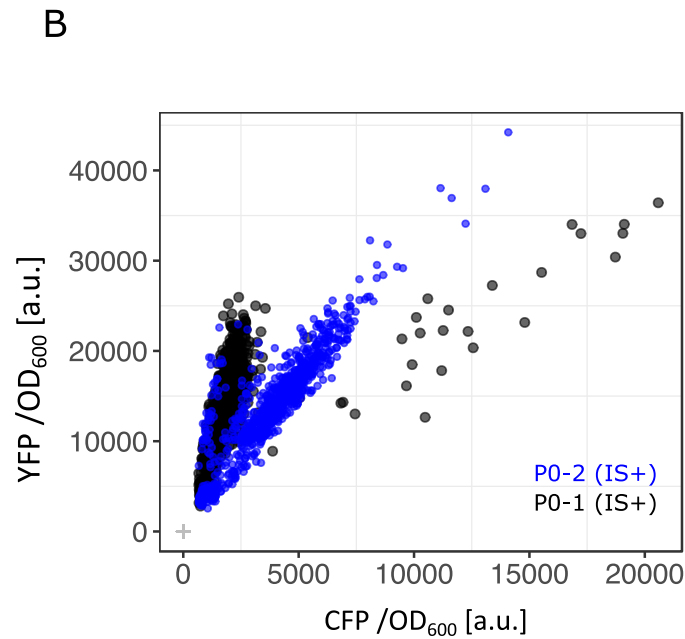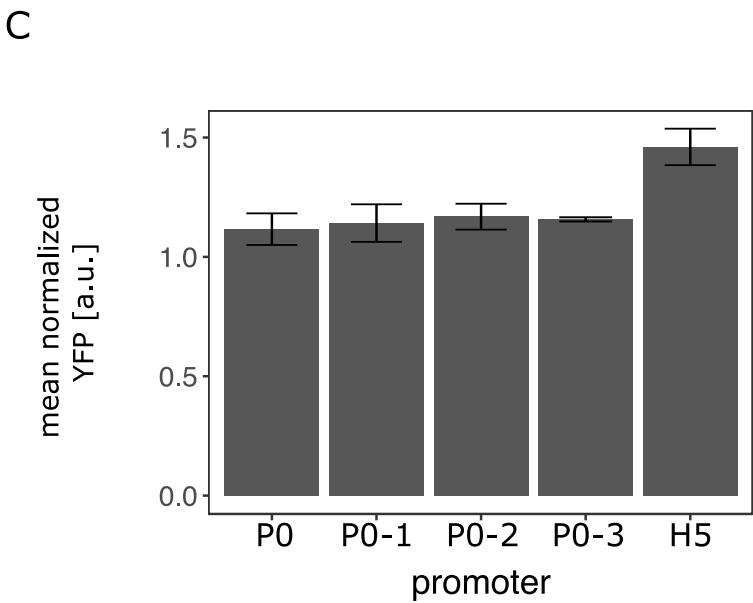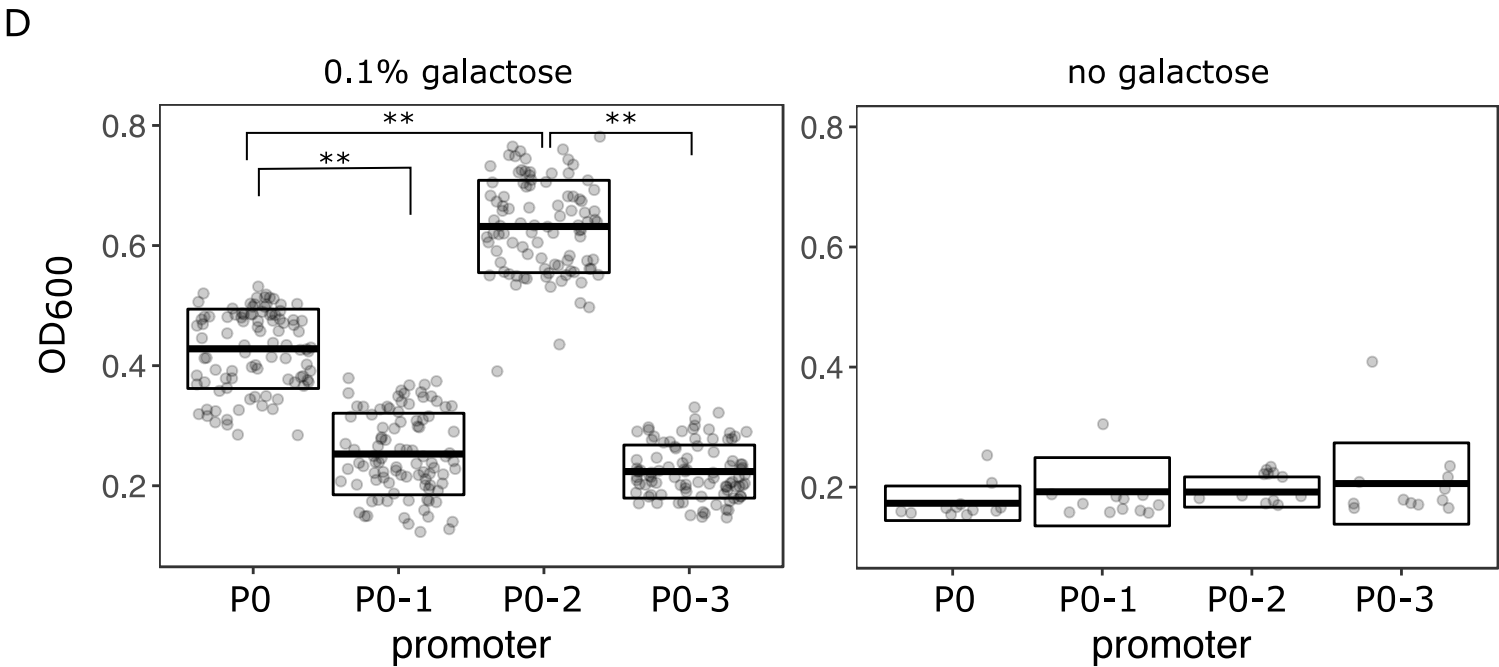

Supplement: supp [file elife-82240-supp-v1.zip]

Figure 5 - Figure Supplement 1

A

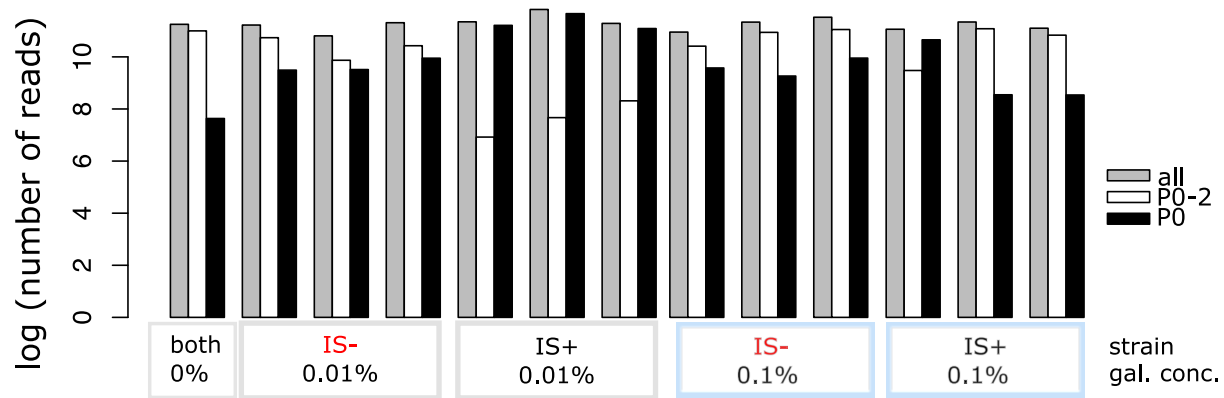

Supplement: supp [file elife-82240-supp-v1.zip]

Figure 7 - Figure Supplement 1

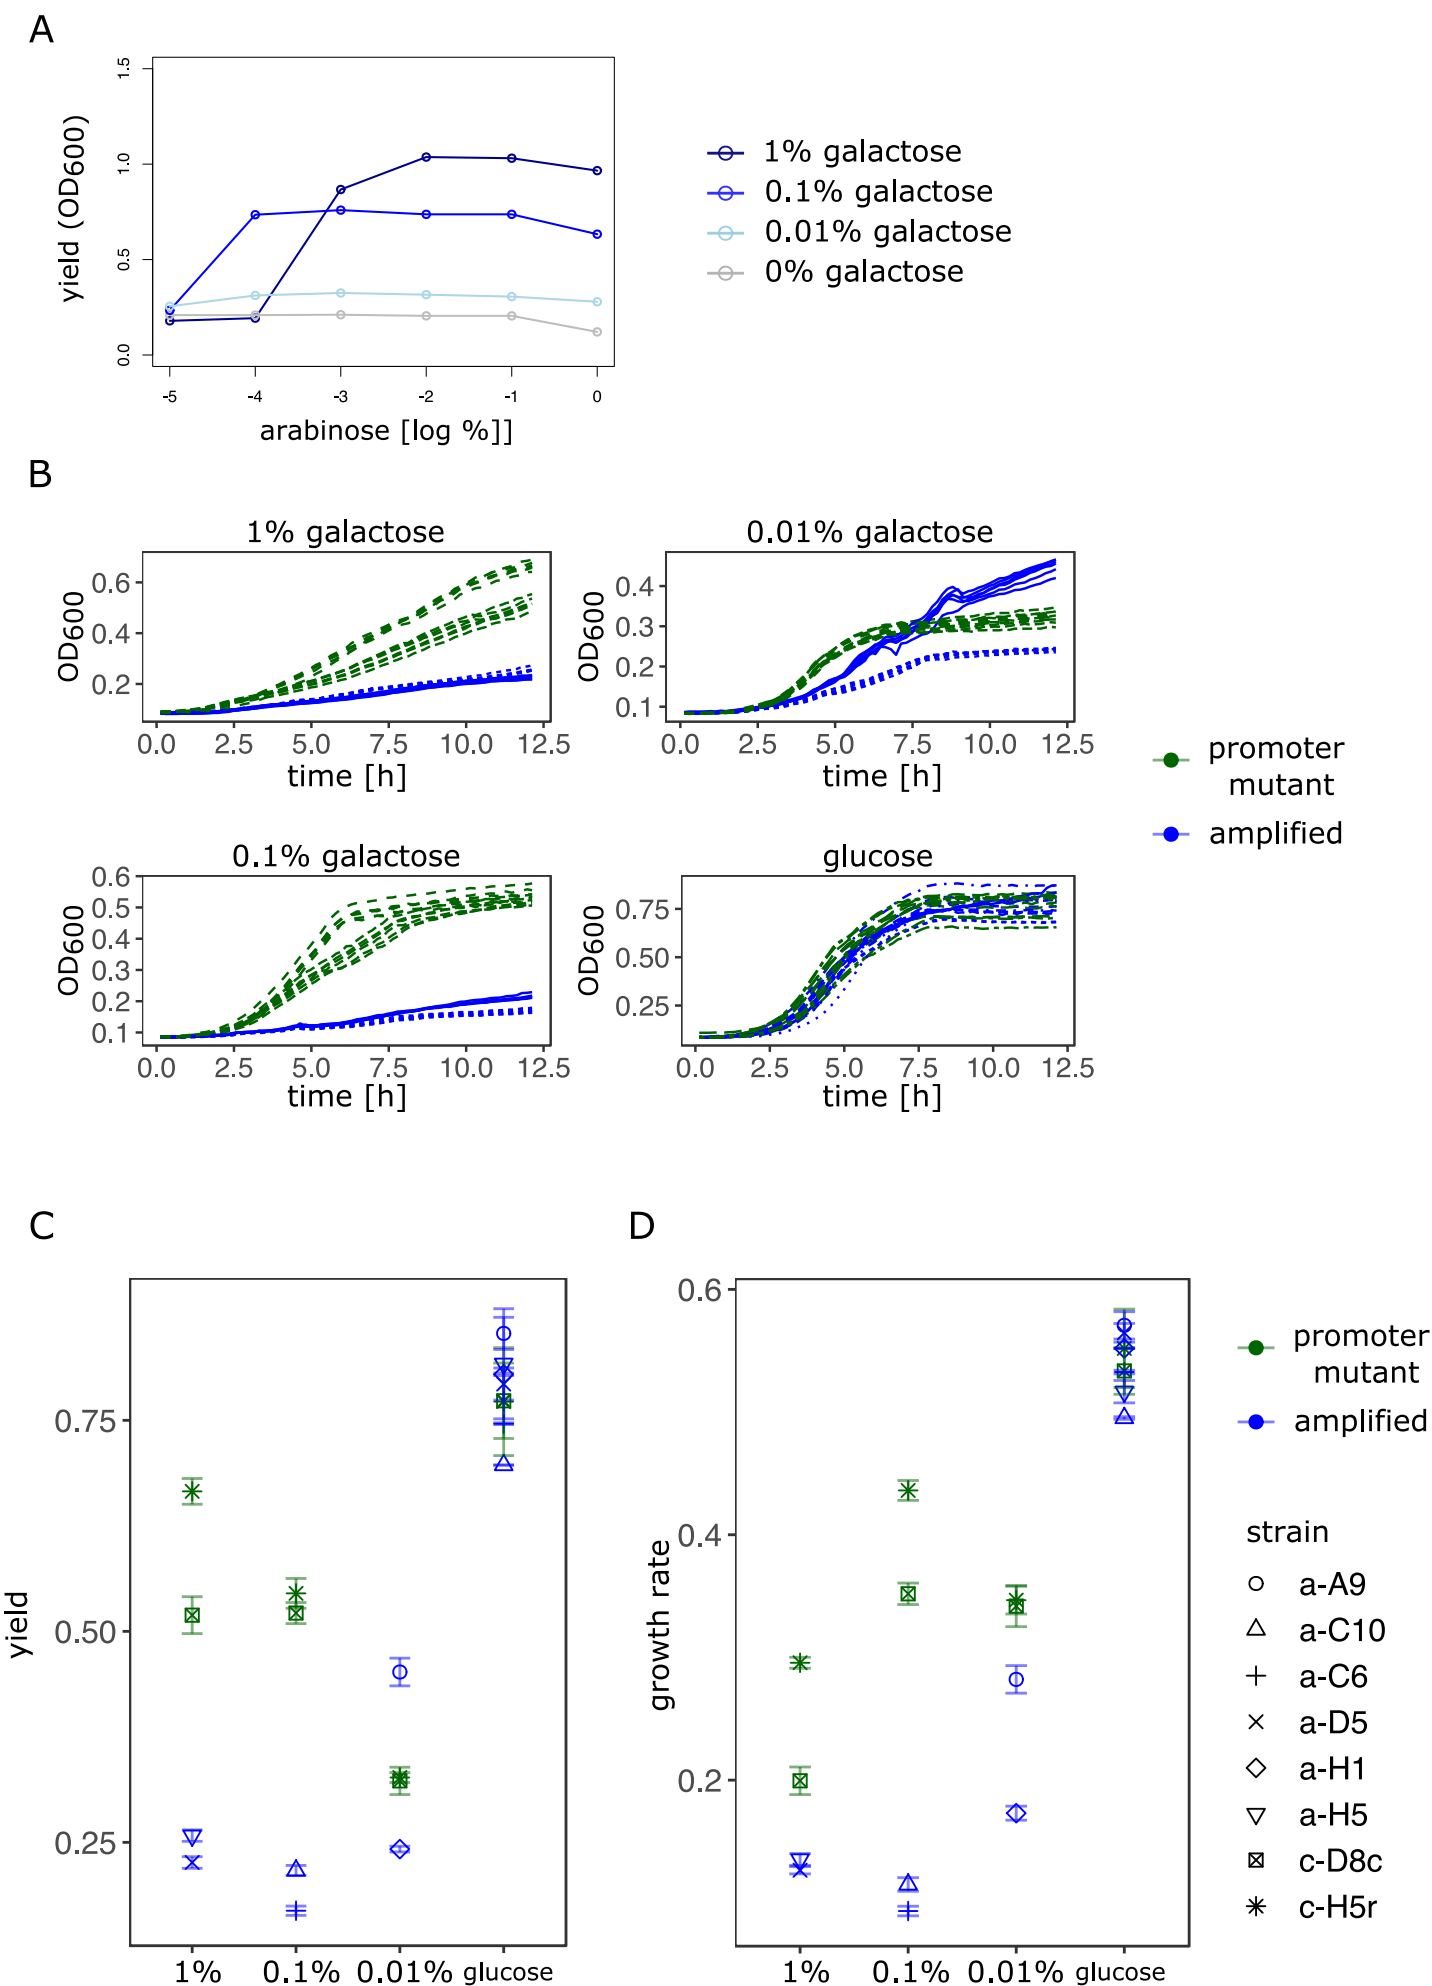

Supplement: supp [file elife-82240-supp-v1.zip]

Figure 4 - Figure Supplement 2

A

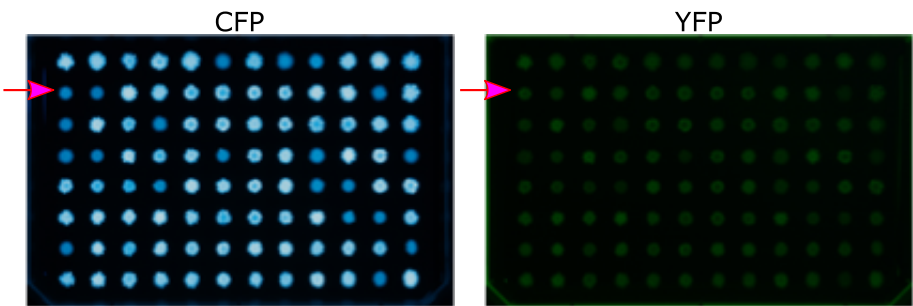

Supplement: supp [file elife-82240-supp-v1.zip]

Figure 2 - Figure Supplement 1

A

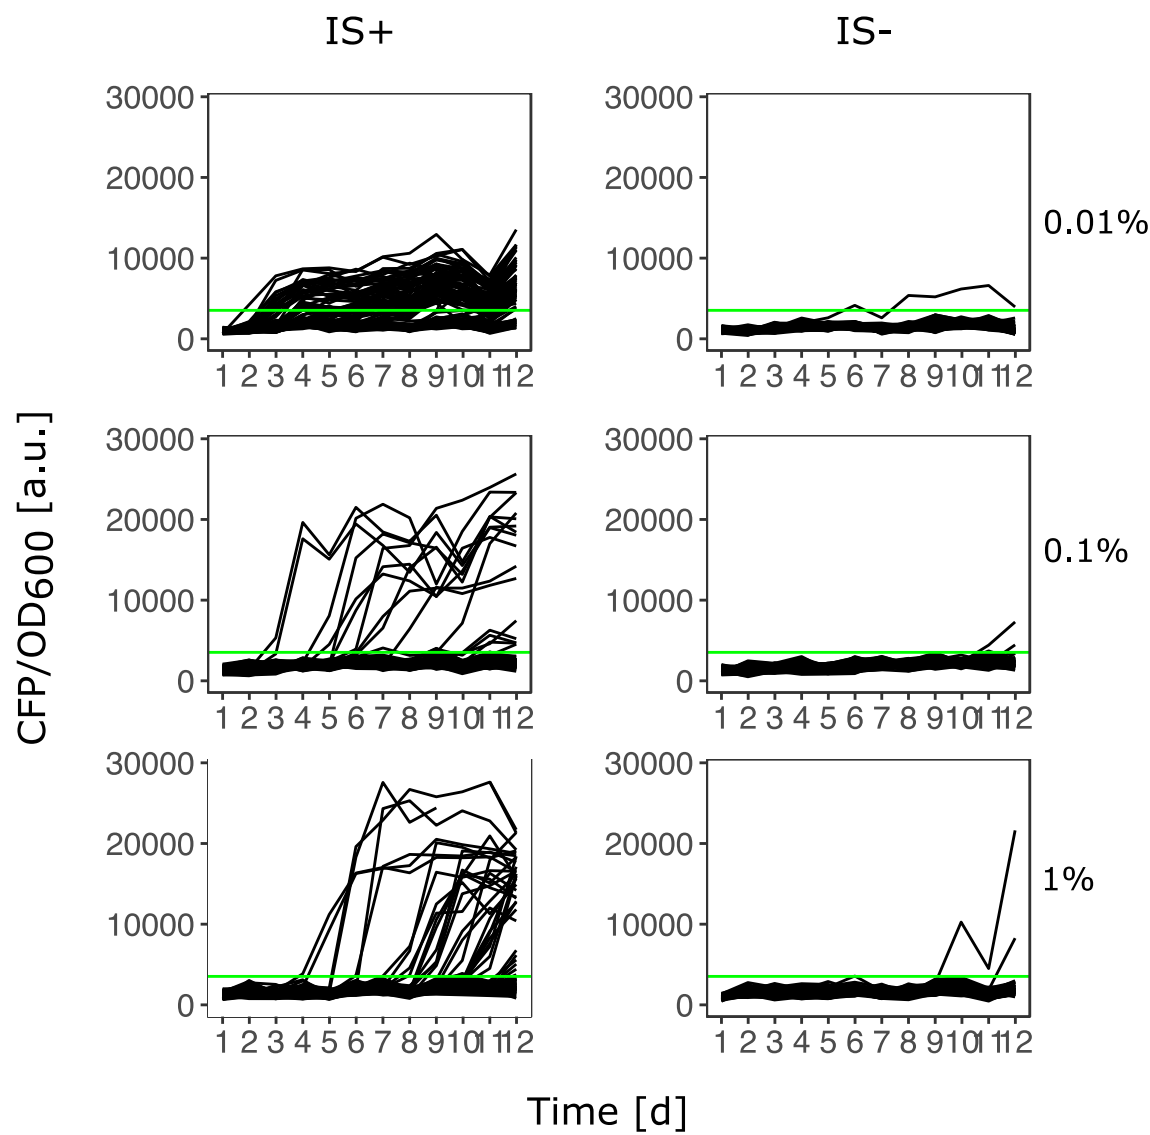

B

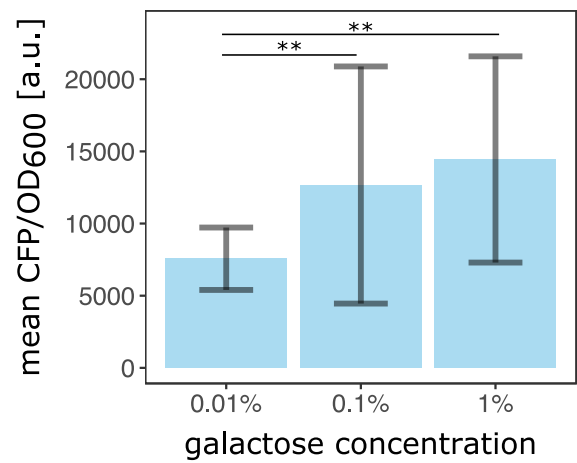

Supplement: supp [file elife-82240-supp-v1.zip]

Figure 2 - Figure Supplement 2

A

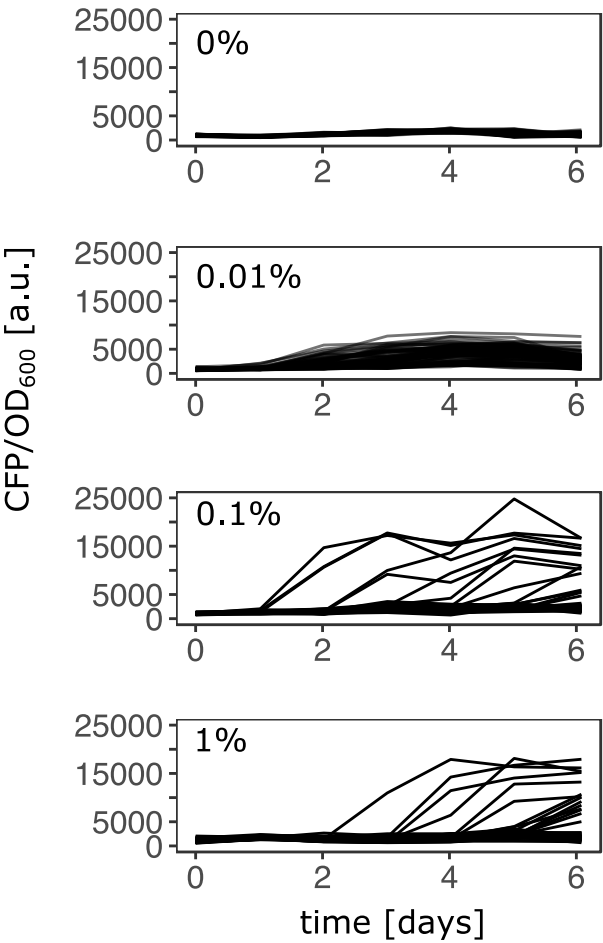

B

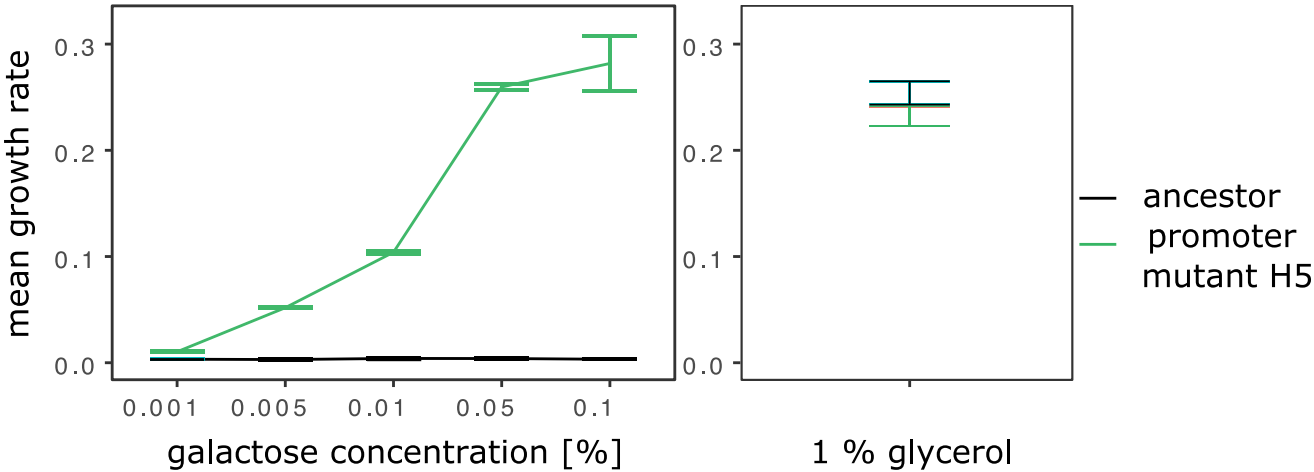

Supplement: supp [file elife-82240-supp-v1.zip]

Figure 2 - Figure Supplement 3

A

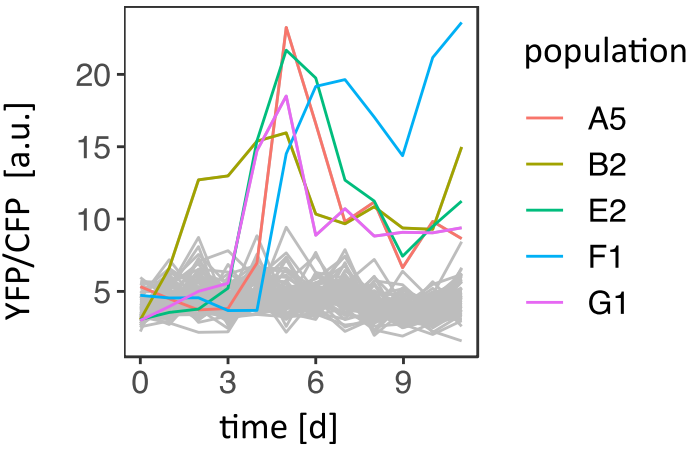

B

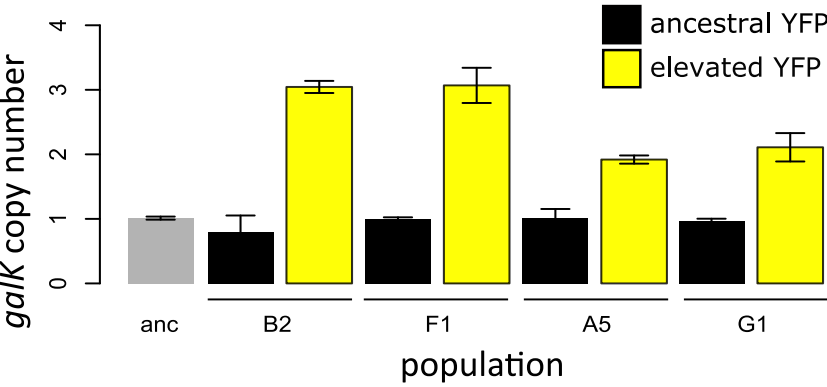

C

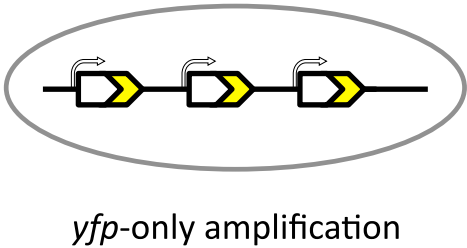

Supplement: supp [file elife-82240-supp-v1.zip]
